# Supplementary material for: Potential Similarities in Sex Difference in Key Genes and Their Expression, Network, EQTL and Pathways between COVID-19 and Chronic Kidney Disease Based on Mouse Model
Source: MDPI journal article supplement (doi:10.3390/jpm12071190), 2022-07-21

**Supplemental Table S1. Correlation Matrix among probes of Ace2\***

| Spearman Rank Correlation (rho)          |                                                                                                                                                                                  |                           |                           |                           |                           |                           |                           |
|------------------------------------------|----------------------------------------------------------------------------------------------------------------------------------------------------------------------------------|---------------------------|---------------------------|---------------------------|---------------------------|---------------------------|---------------------------|
| P<br>e<br>a<br>r<br>s<br>o<br>n<br><br>r |                                                                                                                                                                                  | Trait1                    | Trait2                    | Trait3                    | Trait4                    | Trait5                    | Trait6                    |
|                                          | <b><u>Trait 1: MA_M2M_0706_R::1452138_a_at</u></b><br>Ace2 on Chr X @ 164.167855 Mb<br>angiotensin I converting enzyme (peptidyl-<br>dipeptidase A) 2<br>last 2~6 and 11 exons   | <i>n</i><br><b>38</b>     | <b>0.822</b><br><b>38</b> | <b>0.720</b><br><b>38</b> | <b>0.247</b><br><b>34</b> | <b>0.292</b><br><b>34</b> | <b>0.201</b><br><b>34</b> |
|                                          | <b><u>Trait 2: MA_M2M_0706_R::1425102_a_at</u></b><br>Ace2 on Chr X @ 164.182645 Mb<br>angiotensin I converting enzyme (peptidyl-<br>dipeptidase A) 2<br>3'-UTR and last 4 exons | <b>0.806</b><br><b>38</b> | <i>n</i><br><b>38</b>     | <b>0.738</b><br><b>38</b> | <b>0.501</b><br><b>34</b> | <b>0.453</b><br><b>34</b> | <b>0.204</b><br><b>34</b> |
|                                          | <b><u>Trait 3: MA_M2M_0706_R::1425103_at</u></b><br>Ace2 on Chr X @ 164.187853 Mb<br>angiotensin I converting enzyme (peptidyl-<br>dipeptidase A) 2<br>middle to distal 3'-UTR   | <b>0.742</b><br><b>38</b> | <b>0.683</b><br><b>38</b> | <i>n</i><br><b>38</b>     | <b>0.221</b><br><b>34</b> | <b>0.314</b><br><b>34</b> | <b>0.188</b><br><b>34</b> |
|                                          | <b><u>Trait 4: MA_M2F_0706_R::1452138_a_at</u></b><br>Ace2 on Chr X @ 164.167855 Mb<br>angiotensin I converting enzyme (peptidyl-<br>dipeptidase A) 2<br>last 2~6 and 11 exons   | <b>0.245</b><br><b>34</b> | <b>0.410</b><br><b>34</b> | <b>0.209</b><br><b>34</b> | <i>n</i><br><b>52</b>     | <b>0.721</b><br><b>52</b> | <b>0.495</b><br><b>52</b> |
|                                          | <b><u>Trait 5: MA_M2F_0706_R::1425102_a_at</u></b><br>Ace2 on Chr X @ 164.182645 Mb<br>angiotensin I converting enzyme (peptidyl-<br>dipeptidase A) 2<br>3'-UTR and last 4 exons | <b>0.248</b><br><b>34</b> | <b>0.389</b><br><b>34</b> | <b>0.289</b><br><b>34</b> | <b>0.763</b><br><b>52</b> | <i>n</i><br><b>52</b>     | <b>0.706</b><br><b>52</b> |
|                                          | <b><u>Trait 6: MA_M2F_0706_R::1425103_at</u></b><br>Ace2 on Chr X @ 164.187853 Mb<br>angiotensin I converting enzyme (peptidyl-<br>dipeptidase A) 2<br>middle to distal 3'-UTR   | <b>0.202</b><br><b>34</b> | <b>0.218</b><br><b>34</b> | <b>0.325</b><br><b>34</b> | <b>0.492</b><br><b>52</b> | <b>0.695</b><br><b>52</b> | <i>n</i><br><b>52</b>     |

\*Lower left cells show Pearson product-moment correlations; upper right cells provide Spearman rank order correlations. Each cell also contains the number of cases (n). **Red color** = values higher than 0.7. **Orange** = between 0.5 and 0.7. **Blue** = Values lower than -0.7; **Green** = between -0.5 and -0.7.

**Supplemental Table S2. Correlation Matrix among probes of Adam17.**

| Spearman Rank Correlation (rho)      |                                                                                                                                                                       |                                       |                                       |                                       |                                       |                                       |                           |                           |                                       |
|--------------------------------------|-----------------------------------------------------------------------------------------------------------------------------------------------------------------------|---------------------------------------|---------------------------------------|---------------------------------------|---------------------------------------|---------------------------------------|---------------------------|---------------------------|---------------------------------------|
| P<br>e<br>a<br>r<br>s<br>o<br>n<br>r |                                                                                                                                                                       | Trait1                                | Trait2                                | Trait3                                | Trait4                                | Trait5                                | Trait6                    | Trait7                    | Trait8                                |
|                                      | <b>Trait 1:</b><br><a href="#">MA M2F 0706 R::1421858 at</a><br>Adam17 on Chr 12 @<br>21.323941 Mb<br>a disintegrin and metalloproteinase domain 17 mid distal 3' UTR | $n$<br>52                             | $\underline{0.408}$<br>52             | $\underline{0.276}$<br>52             | $\underline{\underline{0.414}}$<br>52 | $\underline{0.410}$<br>34             | $\underline{0.213}$<br>34 | $\underline{0.262}$<br>34 | $\underline{\underline{0.447}}$<br>34 |
|                                      | <b>Trait 2:</b><br><a href="#">MA M2F 0706 R::1421859 at</a><br>Adam17 on Chr 12 @<br>21.324648 Mb<br>a disintegrin and metalloproteinase domain 17 proximal 3-UTR    | $\underline{0.402}$<br>52             | $n$<br>52                             | $\underline{0.543}$<br>52             | $\underline{\underline{0.545}}$<br>52 | $\underline{0.386}$<br>34             | $\underline{0.255}$<br>34 | $\underline{0.073}$<br>34 | $\underline{\underline{0.378}}$<br>34 |
|                                      | <b>Trait 3:</b><br><a href="#">MA M2F 0706 R::1421857 at</a><br>Adam17 on Chr 12 @<br>21.325298 Mb<br>a disintegrin and metalloproteinase domain 17 last 4 exons      | $\underline{0.244}$<br>52             | $\underline{0.520}$<br>52             | $n$<br>52                             | $\underline{\underline{0.539}}$<br>52 | $\underline{0.502}$<br>34             | $\underline{0.185}$<br>34 | $\underline{0.077}$<br>34 | $\underline{\underline{0.148}}$<br>34 |
|                                      | <b>Trait 4:</b><br><a href="#">MA M2F 0706 R::1445500 at</a><br>Adam17 on Chr 12 @<br>21.353419 Mb<br>a disintegrin and metalloproteinase domain 17                   | $\underline{\underline{0.389}}$<br>52 | $\underline{\underline{0.531}}$<br>52 | $\underline{\underline{0.501}}$<br>52 | $n$<br>52                             | $\underline{\underline{0.541}}$<br>34 | $\underline{0.307}$<br>34 | $\underline{0.198}$<br>34 | $\underline{0.503}$<br>34             |
|                                      | <b>Trait 5:</b><br><a href="#">MA M2M 0706 R::1421858 at</a><br>Adam17 on Chr 12 @<br>21.323941 Mb<br>a disintegrin and metalloproteinase domain 17 mid distal 3' UTR | $\underline{0.391}$<br>34             | $\underline{0.382}$<br>34             | $\underline{0.452}$<br>34             | $\underline{\underline{0.511}}$<br>34 | $n$<br>38                             | $\underline{0.690}$<br>38 | $\underline{0.420}$<br>38 | $\underline{\underline{0.602}}$<br>38 |
|                                      | <b>Trait 6:</b><br><a href="#">MA M2M 0706 R::1421859 at</a><br>Adam17 on Chr 12 @<br>21.324648 Mb<br>a disintegrin and metalloproteinase domain 17 proximal 3-UTR    | $\underline{0.184}$<br>34             | $\underline{0.281}$<br>34             | $\underline{0.155}$<br>34             | $\underline{\underline{0.241}}$<br>34 | $\underline{0.697}$<br>38             | $n$<br>38                 | $\underline{0.546}$<br>38 | $\underline{\underline{0.582}}$<br>38 |

|  |                                                                                                                                                               |                    |                    |                    |                    |                    |                    |                    |                    |
|--|---------------------------------------------------------------------------------------------------------------------------------------------------------------|--------------------|--------------------|--------------------|--------------------|--------------------|--------------------|--------------------|--------------------|
|  | <b>Trait 7:</b><br><a href="#">MA M2M 0706 R::1421857 at</a><br>Adam17 on Chr 12 @ 21.325298 Mb<br>a disintegrin and metalloproteinase domain 17 last 4 exons | <u>0.136</u><br>34 | <u>0.082</u><br>34 | <u>0.000</u><br>34 | <u>0.161</u><br>34 | <u>0.355</u><br>38 | <u>0.571</u><br>38 | <i>n</i><br>38     | <u>0.415</u><br>38 |
|  | <b>Trait 8:</b><br><a href="#">MA M2M 0706 R::1445500 at</a><br>Adam17 on Chr 12 @ 21.353419 Mb<br>a disintegrin and metalloproteinase domain 17              | <u>0.429</u><br>34 | <u>0.397</u><br>34 | <u>0.155</u><br>34 | <u>0.470</u><br>34 | <u>0.568</u><br>38 | <u>0.563</u><br>38 | <u>0.403</u><br>38 | <i>n</i><br>38     |

\* \*Lower left cells show Pearson product-moment correlations; upper right cells provide Spearman rank order correlations. Each cell also contains the number of cases (n). **Red color** = values higher than 0.7. **Orange** = between 0.5 and 0.7. **Blue** = Values lower than -0.7; **Green** = between -0.5 and -0.7.

**Supplemental Table S3. Correlation Matrix among probes of Tmprss2.**

| Spearman Rank Correlation (rho)      |                                                                                                                                               |                    |                    |                    |                    |                    |                    |                    |                    |
|--------------------------------------|-----------------------------------------------------------------------------------------------------------------------------------------------|--------------------|--------------------|--------------------|--------------------|--------------------|--------------------|--------------------|--------------------|
| P<br>e<br>a<br>r<br>s<br>o<br>n<br>r |                                                                                                                                               | <u>Trait 1</u>     | <u>Trait 2</u>     | <u>Trait 3</u>     | <u>Trait 4</u>     | <u>Trait 5</u>     | <u>Trait 6</u>     | <u>Trait 7</u>     | <u>Trait 8</u>     |
|                                      | <b>Trait 1:</b><br><a href="#">MA M2F 0706 R::1458347 s at</a><br>Tmprss2 on Chr 16 @ 97.564715 Mb<br>transmembrane protease, serine 2 3' UTR | <i>n</i><br>52     | <u>0.103</u><br>52 | <u>0.074</u><br>52 | <u>0.151</u><br>52 | <u>0.417</u><br>34 | <u>0.229</u><br>34 | <u>0.049</u><br>34 | <u>0.032</u><br>34 |
|                                      | <b>Trait 2:</b><br><a href="#">MA M2F 0706 R::1419154 at</a><br>Tmprss2 on Chr 16 @ 97.564874 Mb<br>transmembrane protease, serine 2          | <u>0.131</u><br>52 | <i>n</i><br>52     | <u>0.004</u><br>52 | <u>0.586</u><br>52 | <u>0.013</u><br>34 | <u>0.235</u><br>34 | <u>0.016</u><br>34 | <u>0.035</u><br>34 |
|                                      | <b>Trait 3:</b><br><a href="#">MA M2F 0706 R::1459510 at</a><br>Tmprss2 on Chr 16 @ 97.566141 Mb<br>transmembrane protease, serine 2          | <u>0.100</u><br>52 | <u>0.092</u><br>52 | <i>n</i><br>52     | <u>0.024</u><br>52 | <u>0.039</u><br>34 | <u>0.302</u><br>34 | <u>0.215</u><br>34 | <u>0.208</u><br>34 |

|  |                                                                                                                                                     |                         |                         |                         |                         |                         |                         |                         |                         |
|--|-----------------------------------------------------------------------------------------------------------------------------------------------------|-------------------------|-------------------------|-------------------------|-------------------------|-------------------------|-------------------------|-------------------------|-------------------------|
|  | <b>Trait 4:</b><br><b>MA M2F 0706 R::1449369 at</b><br>Tmprss2 on Chr 16 @ 97.567022 Mb<br>transmembrane protease, serine 2<br>exons 10, 11, and 12 | $\frac{-}{0.177}$<br>52 | $\frac{0.547}{52}$      | $\frac{-}{0.005}$<br>52 | $\frac{n}{52}$          | $\frac{-}{0.202}$<br>34 | $\frac{0.123}{34}$      | $\frac{0.053}{34}$      | $\frac{-}{0.124}$<br>34 |
|  | <b>Trait 5:</b><br><b>MA M2M 0706 R::1458347 s</b><br><b>at</b><br>Tmprss2 on Chr 16 @ 97.564715 Mb<br>transmembrane protease, serine 2<br>3' UTR   | $\frac{0.457}{34}$      | $\frac{-}{0.004}$<br>34 | $\frac{-}{0.065}$<br>34 | $\frac{-}{0.278}$<br>34 | $\frac{n}{38}$          | $\frac{0.272}{38}$      | $\frac{-}{0.140}$<br>38 | $\frac{-}{0.159}$<br>38 |
|  | <b>Trait 6:</b><br><b>MA M2M 0706 R::1419154 at</b><br>Tmprss2 on Chr 16 @ 97.564874 Mb<br>transmembrane protease, serine 2                         | $\frac{0.211}{34}$      | $\frac{0.319}{34}$      | $\frac{0.298}{34}$      | $\frac{0.026}{34}$      | $\frac{0.349}{38}$      | $\frac{n}{38}$          | $\frac{-}{0.059}$<br>38 | $\frac{0.201}{38}$      |
|  | <b>Trait 7:</b><br><b>MA M2M 0706 R::1459510 at</b><br>Tmprss2 on Chr 16 @ 97.566141 Mb<br>transmembrane protease, serine 2                         | $\frac{-}{0.038}$<br>34 | $\frac{0.031}{34}$      | $\frac{0.184}{34}$      | $\frac{0.090}{34}$      | $\frac{-}{0.151}$<br>38 | $\frac{-}{0.094}$<br>38 | $\frac{n}{38}$          | $\frac{-}{0.368}$<br>38 |
|  | <b>Trait 8:</b><br><b>MA M2M 0706 R::1449369 at</b><br>Tmprss2 on Chr 16 @ 97.567022 Mb<br>transmembrane protease, serine 2<br>exons 10, 11, and 12 | $\frac{0.037}{34}$      | $\frac{0.069}{34}$      | $\frac{-}{0.240}$<br>34 | $\frac{-}{0.111}$<br>34 | $\frac{-}{0.107}$<br>38 | $\frac{0.195}{38}$      | $\frac{-}{0.444}$<br>38 | $\frac{n}{38}$          |

\*Lower left cells show Pearson product-moment correlations; upper right cells provide Spearman rank order correlations. Each cell also contains the number of cases (n). **Red color** = values higher than 0.7. **Orange** = between 0.5 and 0.7. **Blue** = Values lower than -0.7; **Green** = between -0.5 and -0.7.

**Supplemental Table S4. Candidate genes on Chr 2 in female for Adma17**

| Ind<br>ex | Symbol      | Mb<br>Start                  | Len<br>gth<br>(Kb)       | SN<br>P<br>Co<br>unt | SNP<br>Dens<br>ity | Avg<br>Ex<br>pr | Hu<br>man<br>Chr | Mb<br>Start<br>(hg19)       | Gene<br>Descripti<br>on            | Polym<br>iRTS<br>Datab<br>ase | Gen<br>e<br>Wea<br>ver<br>Info<br>Cont<br>ent |
|-----------|-------------|------------------------------|--------------------------|----------------------|--------------------|-----------------|------------------|-----------------------------|------------------------------------|-------------------------------|-----------------------------------------------|
| 1         | <b>Hao1</b> | <b>134.49</b><br><b>7360</b> | <b>56.9</b><br><b>92</b> | <b>5</b>             | 0.0877<br>32       | --              | 20               | <b>67.115</b><br><b>672</b> | hydroxyacid<br>oxidase 1,<br>liver |                               |                                               |

|                          |    |                                                                                                          |                              |                           |                        |              |    |    |                             |                                                                                                                                       |  |  |
|--------------------------|----|----------------------------------------------------------------------------------------------------------|------------------------------|---------------------------|------------------------|--------------|----|----|-----------------------------|---------------------------------------------------------------------------------------------------------------------------------------|--|--|
| <input type="checkbox"/> | 2  | <b>Tmx4</b>             | <b>134.59</b><br><b>4501</b> | <b>49.6</b><br><b>20</b>  | <b>18</b>              | 0.3627<br>57 | -- | -- | --                          | thioredoxin-related transmembrane protein 4 (Tmx4), mRNA.                                                                             |  |  |
| <input type="checkbox"/> | 3  | <b>Txndc13</b>          | <b>134.59</b><br><b>4502</b> | <b>49.6</b><br><b>19</b>  | <b>18</b>              | 0.3627<br>64 | -- | -- | --                          | thioredoxin domain containing 13                                                                                                      |  |  |
| <input type="checkbox"/> | 4  | <b>Plcb1</b>            | <b>134.78</b><br><b>6163</b> | <b>689.</b><br><b>095</b> | <b>14</b><br><b>40</b> | 2.0896<br>97 | -- | 20 | <b>74.685</b><br><b>334</b> | phospholipase C, beta 1                                                                                                               |  |  |
| <input type="checkbox"/> | 5  | <b>4930545L23Rik</b>    | <b>135.16</b><br><b>9572</b> | <b>46.0</b><br><b>44</b>  | <b>81</b>              | 1.7591<br>87 | -- | -- | --                          | RIKEN cDNA 4930545L23 gene                                                                                                            |  |  |
| <input type="checkbox"/> | 6  | <b>9630028H03Rik</b>    | <b>135.58</b><br><b>0529</b> | <b>2.69</b><br><b>1</b>   | 0                      | 0            | -- | -- | --                          | RIKEN cDNA 9630028H03 gene                                                                                                            |  |  |
| <input type="checkbox"/> | 7  | <b>Plcb4</b>           | <b>135.65</b><br><b>9546</b> | <b>323.</b><br><b>580</b> | <b>26</b><br><b>0</b>  | 0.8035<br>11 | -- | 20 | <b>32.325</b><br><b>903</b> | phospholipase C, beta 4                                                                                                               |  |  |
| <input type="checkbox"/> | 8  | <b>AK044842</b>       | <b>135.94</b><br><b>9852</b> | <b>1.61</b><br><b>7</b>   | 0                      | 0            | -- | -- | --                          | 9.5 days embryo parthenogenote cDNA, RIKEN full-length enriched library, clone:B130007K04 product:unclassified, full insert sequence. |  |  |
| <input type="checkbox"/> | 9  | <b>6330527006Rik</b>  | <b>136.05</b><br><b>7926</b> | <b>11.9</b><br><b>91</b>  | <b>1</b>               | 0.0833<br>96 | -- | -- | --                          | RIKEN cDNA 6330527006 gene                                                                                                            |  |  |
| <input type="checkbox"/> | 10 | <b>Lamp5</b>          | <b>136.05</b><br><b>7926</b> | <b>11.9</b><br><b>91</b>  | <b>1</b>               | 0.0833<br>96 | -- | -- | --                          | lysosomal-associated membrane protein family, member 5 (Lamp5), mRNA.                                                                 |  |  |
| <input type="checkbox"/> | 11 | <b>Pak7</b>           | <b>136.08</b><br><b>1087</b> | <b>306.</b><br><b>880</b> | <b>10</b><br><b>5</b>  | 0.3421<br>53 | -- | 20 | <b>7.9499</b><br><b>47</b>  | p21 protein (Cdc42/Rac)-                                                                                                              |  |  |

|                                |                                                                                                          |                   |                |          |          |    |    |                   |                                                                                                                                   |  |  |
|--------------------------------|----------------------------------------------------------------------------------------------------------|-------------------|----------------|----------|----------|----|----|-------------------|-----------------------------------------------------------------------------------------------------------------------------------|--|--|
|                                |                                                                                                          |                   |                |          |          |    |    |                   | activated kinase 7                                                                                                                |  |  |
| 12<br><input type="checkbox"/> | <b>2900018K06Rik</b>    | <b>136.120256</b> | <b>0.465</b>   | 0        | 0        | -- | -- | --                | RIKEN cDNA 2900018K06 gene                                                                                                        |  |  |
| 13<br><input type="checkbox"/> | <b>BC034902</b>         | <b>136.501909</b> | <b>13.605</b>  | <b>1</b> | 0.073502 | -- | -- | --                | cDNA sequence BC034902                                                                                                            |  |  |
| 14<br><input type="checkbox"/> | <b>Ankrd5</b>           | <b>136.532320</b> | <b>23.534</b>  | 0        | 0        | -- | 20 | <b>74.439111</b>  | ankyrin repeat domain 5                                                                                                           |  |  |
| 15<br><input type="checkbox"/> | <b>Ankef1</b>           | <b>136.532320</b> | <b>23.568</b>  | 0        | 0        | -- | -- | --                | ankyrin repeat and EF-hand domain containing 1 (Ankef1), mRNA.                                                                    |  |  |
| 16<br><input type="checkbox"/> | <b>Snap25</b>           | <b>136.713449</b> | <b>68.979</b>  | <b>2</b> | 0.028994 | -- | 20 | <b>143.828428</b> | synaptosomal-associated protein 25                                                                                                |  |  |
| 17<br><input type="checkbox"/> | <b>Mkks</b>           | <b>136.873780</b> | <b>17.626</b>  | <b>1</b> | 0.056734 | -- | 20 | <b>102.315276</b> | McKusick-Kaufman syndrome                                                                                                         |  |  |
| 18<br><input type="checkbox"/> | <b>2210009G21Rik</b>  | <b>136.891217</b> | <b>178.432</b> | <b>5</b> | 0.028022 | -- | -- | --                | RIKEN cDNA 2210009G21 gene                                                                                                        |  |  |
| 19<br><input type="checkbox"/> | <b>AK164084</b>       | <b>136.892288</b> | <b>2.817</b>   | 0        | 0        | -- | -- | --                | 12 days embryo spinal cord cDNA, RIKEN full-length enriched library, clone:C530005O09 product:unclassified, full insert sequence. |  |  |
| 20<br><input type="checkbox"/> | <b>AK148781</b>       | <b>136.897096</b> | <b>3.329</b>   | <b>1</b> | 0.300391 | -- | -- | --                | 2 days neonate sympathetic ganglion cDNA, RIKEN full-length enriched                                                              |  |  |

|                                                                                         |                                                                                                 |                        |                     |          |              |    |    |    |                                                                                             |  |  |
|-----------------------------------------------------------------------------------------|-------------------------------------------------------------------------------------------------|------------------------|---------------------|----------|--------------|----|----|----|---------------------------------------------------------------------------------------------|--|--|
|                                                                                         |                                                                                                 |                        |                     |          |              |    |    |    | library,<br>clone:712044<br>6C05<br>product:uncla<br>ssifiable, full<br>insert<br>sequence. |  |  |
| 21<br> | <b>Slx4ip</b>  | <b>136.89<br/>9350</b> | <b>170.<br/>428</b> | <b>5</b> | 0.029<br>338 | -- | -- | -- | SLX4<br>interacting<br>protein<br>(Slx4ip),<br>transcript<br>variant 2,<br>mRNA.            |  |  |

Supplemental Table S5. Candidate genes for Ace2 eQTL in female on Chr 2.

|                                                                                     | In<br>de<br>x | Symbo<br>l                              | Mb<br>Star<br>t                      | Le<br>ngt<br>h<br>(K<br>b)  | S<br>N<br>P<br>Co<br>un<br>t | SN<br>P<br>De<br>nsit<br>y | A<br>vg<br>E<br>x<br>pr | Hu<br>ma<br>n<br>Ch<br>r | Mb<br>Star<br>t<br>(hg<br>19) | Gene<br>Descr<br>iption                                     |
|-------------------------------------------------------------------------------------|---------------|-----------------------------------------|--------------------------------------|-----------------------------|------------------------------|----------------------------|-------------------------|--------------------------|-------------------------------|-------------------------------------------------------------|
|  | 1             | <a href="#">LOC24<br/>1572</a>          | <a href="#">100.5<br/>8758<br/>6</a> | <a href="#">0.1<br/>61</a>  | 0                            | 0                          | --                      | --                       | <a href="#">==</a>            | simila<br>r to<br>Pyruv<br>ate<br>kinase<br>,<br>muscl<br>e |
|  | 2             | <a href="#">B23011<br/>8H07Ri<br/>k</a> | <a href="#">101.5<br/>6078<br/>0</a> | <a href="#">60.<br/>266</a> | <a href="#">5</a>            | 0.08<br>296<br>6           | --                      | --                       | <a href="#">==</a>            | RIKE<br>N<br>cDNA<br>B2301<br>18H07<br>gene                 |
|  | 3             | <a href="#">A13004<br/>2O14Ri<br/>k</a> | <a href="#">101.6<br/>0074<br/>3</a> | <a href="#">3.7<br/>72</a>  | 0                            | 0                          | --                      | --                       | <a href="#">==</a>            | RIKE<br>N<br>cDNA<br>A1300                                  |

|                          | In<br>de<br>x | Symbo<br>l                                                            | Mb<br>Star<br>t                                                    | Le<br>ngt<br>h<br>(K<br>b)                 | S<br>N<br>P<br>Co<br>un<br>t            | SN<br>P<br>De<br>nsit<br>y | A<br>vg<br>E<br>x<br>pr | Hu<br>ma<br>n<br>Ch<br>r | Mb<br>Star<br>t<br>(hg<br>19)                                     | Gene<br>Descr<br>iption                                                                  |
|--------------------------|---------------|-----------------------------------------------------------------------|--------------------------------------------------------------------|--------------------------------------------|-----------------------------------------|----------------------------|-------------------------|--------------------------|-------------------------------------------------------------------|------------------------------------------------------------------------------------------|
|                          |               |                                                                       |                                                                    |                                            |                                         |                            |                         |                          |                                                                   | 42O14<br>gene                                                                            |
| <input type="checkbox"/> | 4             | <a href="#">Rag2</a>                                                  | <a href="#">101.6</a><br><a href="#">2934</a><br><a href="#">6</a> | <a href="#">1.5</a><br><a href="#">84</a>  | 0                                       | 0                          | --                      | 11                       | <a href="#">36.5</a><br><a href="#">7007</a><br><a href="#">0</a> | recom<br>binati<br>on<br>activat<br>ing<br>gene 2                                        |
| <input type="checkbox"/> | 5             | <a href="#">Rag1</a>                                                  | <a href="#">101.6</a><br><a href="#">4167</a><br><a href="#">2</a> | <a href="#">3.1</a><br><a href="#">23</a>  | 0                                       | 0                          | --                      | 11                       | <a href="#">36.5</a><br><a href="#">4613</a><br><a href="#">8</a> | recom<br>binati<br>on<br>activat<br>ing<br>gene 1                                        |
| <input type="checkbox"/> | 6             | <a href="#">Traf6</a>                                                 | <a href="#">101.6</a><br><a href="#">7841</a><br><a href="#">9</a> | <a href="#">23.</a><br><a href="#">249</a> | <a href="#">68</a>                      | 2.92<br>485<br>7           | --                      | 11                       | <a href="#">36.4</a><br><a href="#">6729</a><br><a href="#">8</a> | TNF<br>recept<br>or-<br>associ<br>ated<br>factor<br>6                                    |
| <input type="checkbox"/> | 7             | <a href="#">260001</a><br><a href="#">0E01Ri</a><br><a href="#">k</a> | <a href="#">101.7</a><br><a href="#">1428</a><br><a href="#">4</a> | <a href="#">83.</a><br><a href="#">423</a> | <a href="#">10</a><br><a href="#">0</a> | 1.19<br>871<br>0           | --                      | --                       | <a href="#">==</a>                                                | RIKE<br>N<br>cDNA<br>26000<br>10E01<br>gene                                              |
| <input type="checkbox"/> | 8             | <a href="#">Prr5l</a>                                                 | <a href="#">101.7</a><br><a href="#">1428</a><br><a href="#">4</a> | <a href="#">83.</a><br><a href="#">423</a> | <a href="#">10</a><br><a href="#">0</a> | 1.19<br>871<br>0           | --                      | --                       | <a href="#">==</a>                                                | prolin<br>e rich<br>5 like<br>(Prr5l)<br>, transcr<br>ipt<br>varian<br>t 1,<br>mRN<br>A. |



|                          | In<br>de<br>x | Symbo<br>l               | Mb<br>Star<br>t            | Le<br>ngt<br>h<br>(K<br>b) | S<br>N<br>P<br>Co<br>un<br>t | SN<br>P<br>De<br>nsit<br>y | A<br>vg<br>E<br>x<br>pr | Hu<br>ma<br>n<br>Ch<br>r | Mb<br>Star<br>t<br>(hg<br>19) | Gene<br>Descr<br>iption                                                   |
|--------------------------|---------------|--------------------------|----------------------------|----------------------------|------------------------------|----------------------------|-------------------------|--------------------------|-------------------------------|---------------------------------------------------------------------------|
| <input type="checkbox"/> | 9             | <a href="#">AK045896</a> | <a href="#">101.873393</a> | <a href="#">1.633</a>      | <a href="#">5</a>            | 3.061849                   | --                      | --                       | --                            | adult male corpora quadrigemina cDNA, RIKEN full-length enriched libra... |
| <input type="checkbox"/> | 10            | <a href="#">Commdu9</a>  | <a href="#">101.886261</a> | <a href="#">15.378</a>     | <a href="#">9</a>            | 0.585252                   | --                      | 11                       | <a href="#">36.252085</a>     | COMMD domain containing 9                                                 |
| <input type="checkbox"/> | 11            | <a href="#">Ldlrad3</a>  | <a href="#">101.950200</a> | <a href="#">236.260</a>    | <a href="#">413</a>          | 1.748074                   | --                      | --                       | --                            | low density lipoprotein receptor class A domain containing 3              |

**Supplemental Table S6. Candidate genes for eQTL of Adam17 in male**

| Index | Symbol                        | Mb Start   | Length (Kb) | SNP Count | SNP Density | Avg Expr | Human Chr | Mb Start (hg19) | Gene Description                                                          | Polym iRTS Database | Gene Weaver Info Content |
|-------|-------------------------------|------------|-------------|-----------|-------------|----------|-----------|-----------------|---------------------------------------------------------------------------|---------------------|--------------------------|
| 1     | <a href="#">4930591A17Rik</a> | 179.414935 | 1.945       | 26        | 13.367609   | --       | --        | --              | RIKEN cDNA 4930591A17 gene                                                |                     |                          |
| 2     | <a href="#">Cdh4</a>          | 179.442430 | 405.274     | 1109      | 2.736420    | --       | 20        | 102.134202      | cadherin 4                                                                |                     |                          |
| 3     | <a href="#">4930449I21Rik</a> | 179.650732 | 0.890       | 0         | 0           | --       | --        | --              | RIKEN cDNA 4930449I21 gene                                                |                     |                          |
| 4     | <a href="#">Taf4a</a>         | 179.912145 | 64.501      | 90        | 1.395327    | --       | --        | --              | TAF4A RNA polymerase II, TATA box binding protein (TBP)-associated factor |                     |                          |
| 5     | <a href="#">Taf4</a>          | 179.912145 | 64.501      | 90        | 1.395327    | --       | 20        | 80.246375       | TATA-box binding protein associated factor 4 (Taf4), mRNA.                |                     |                          |
| 6     | <a href="#">4921531C22Rik</a> | 179.976852 | 2.161       | 1         | 0.462749    | --       | --        | --              | RIKEN cDNA 4921531C22 gene                                                |                     |                          |
| 7     | <a href="#">Lsm14b</a>        | 180.024986 | 10.475      | 18        | 1.718377    | --       | --        | --              | LSM family member 14B                                                     |                     |                          |
| 8     | <a href="#">Psm7</a>          | 180.036366 | 6.098       | 0         | 0           | --       | 20        | 60.145179       | proteasome (prosome, macropain) subunit, alpha type 7                     |                     |                          |

|                                |                                                                                                     |                              |                          |           |              |    |    |                              |                                                                                 |  |  |
|--------------------------------|-----------------------------------------------------------------------------------------------------|------------------------------|--------------------------|-----------|--------------|----|----|------------------------------|---------------------------------------------------------------------------------|--|--|
| 9<br><input type="checkbox"/>  | <b>Ss18l1</b>      | <b>180.04</b><br><b>2482</b> | <b>27.7</b><br><b>19</b> | <b>5</b>  | 0.1803<br>82 | -- | 20 | <b>60.152</b><br><b>216</b>  | SS18, nBAF chromatin remodeling complex subunit like 1                          |  |  |
| 10<br><input type="checkbox"/> | <b>Gtpbp5</b>      | <b>180.07</b><br><b>0592</b> | <b>15.3</b><br><b>10</b> | <b>3</b>  | 0.1959<br>50 | -- | 20 | <b>27.656</b><br><b>376</b>  | GTP binding protein 5                                                           |  |  |
| 11<br><input type="checkbox"/> | <b>Mtg2</b>        | <b>180.07</b><br><b>0592</b> | <b>15.3</b><br><b>10</b> | <b>3</b>  | 0.1959<br>50 | -- | -- | --                           | mitochondria l ribosome associated GTPase 2 (Mtg2), transcript variant 3, mRNA. |  |  |
| 12<br><input type="checkbox"/> | <b>Hrh3</b>        | <b>180.09</b><br><b>9464</b> | <b>4.94</b><br><b>3</b>  | <b>1</b>  | 0.2023<br>06 | -- | 20 | <b>12.977</b><br><b>847</b>  | histamine receptor H3                                                           |  |  |
| 13<br><input type="checkbox"/> | <b>Osbpl2</b>      | <b>180.11</b><br><b>9365</b> | <b>39.9</b><br><b>27</b> | <b>18</b> | 0.4508<br>23 | -- | 20 | <b>122.92</b><br><b>1857</b> | oxysterol binding protein-like 2                                                |  |  |
| 14<br><input type="checkbox"/> | <b>Adrm1</b>     | <b>180.17</b><br><b>1587</b> | <b>4.69</b><br><b>6</b>  | <b>3</b>  | 0.6388<br>42 | -- | 20 | <b>105.67</b><br><b>7744</b> | adhesion regulating molecule 1                                                  |  |  |
| 15<br><input type="checkbox"/> | <b>Lama5</b>     | <b>180.17</b><br><b>6372</b> | <b>49.4</b><br><b>87</b> | <b>57</b> | 1.1518<br>18 | -- | 20 | <b>51.330</b><br><b>493</b>  | laminin, alpha 5                                                                |  |  |
| 16<br><input type="checkbox"/> | <b>Mir7005</b>   | <b>180.17</b><br><b>9754</b> | <b>0.06</b><br><b>9</b>  | 0         | 0            | -- | -- | --                           | microRNA 7005 (Mir7005), microRNA.                                              |  |  |
| 17<br><input type="checkbox"/> | <b>Rps21</b>     | <b>180.25</b><br><b>7378</b> | <b>1.06</b><br><b>4</b>  | <b>2</b>  | 1.8796<br>99 | -- | 20 | <b>136.14</b><br><b>7461</b> | ribosomal protein S21                                                           |  |  |
| 18<br><input type="checkbox"/> | <b>Mir3091</b>   | <b>180.25</b><br><b>7535</b> | <b>0.07</b><br><b>6</b>  | 0         | 0            | -- | -- | --                           | microRNA 3091 (Mir3091), microRNA.                                              |  |  |
| 19<br><input type="checkbox"/> | <b>Cables2</b>   | <b>180.25</b><br><b>8538</b> | <b>14.9</b><br><b>27</b> | <b>8</b>  | 0.5359<br>42 | -- | 20 | <b>123.27</b><br><b>8127</b> | CDK5 and Abl enzyme substrate 2                                                 |  |  |
| 20<br><input type="checkbox"/> | <b>BC066135</b>  | <b>180.27</b><br><b>7645</b> | <b>12.2</b><br><b>34</b> | <b>14</b> | 1.1443<br>52 | -- | -- | --                           | cDNA sequence BC066135                                                          |  |  |
| 21<br><input type="checkbox"/> | <b>Rbbp8nl</b>   | <b>180.27</b><br><b>7645</b> | <b>12.2</b><br><b>34</b> | <b>14</b> | 1.1443<br>52 | -- | -- | --                           | RBBP8 N-terminal like (Rbbp8nl), mRNA.                                          |  |  |

|                                |                                                                                                        |                              |                          |           |              |    |    |                              |                                                                                                                          |  |  |
|--------------------------------|--------------------------------------------------------------------------------------------------------|------------------------------|--------------------------|-----------|--------------|----|----|------------------------------|--------------------------------------------------------------------------------------------------------------------------|--|--|
| 22<br><input type="checkbox"/> | <b>Gata5</b>          | <b>180.32</b><br><b>5087</b> | <b>9.59</b><br><b>2</b>  | <b>24</b> | 2.5020<br>85 | -- | 20 | <b>111.73</b><br><b>4283</b> | GATA binding protein 5                                                                                                   |  |  |
| 23<br><input type="checkbox"/> | <b>Gata5os</b>        | <b>180.33</b><br><b>2856</b> | <b>7.87</b><br><b>6</b>  | <b>25</b> | 3.1742<br>00 | -- | -- | --                           | GATA binding protein 5, opposite strand (Gata5os), long non-coding RNA.                                                  |  |  |
| 24<br><input type="checkbox"/> | <b>B230312C02Rik</b>  | <b>180.37</b><br><b>0857</b> | <b>15.0</b><br><b>28</b> | <b>31</b> | 2.0628<br>16 | -- | -- | --                           | RIKEN cDNA B230312C02 gene                                                                                               |  |  |
| 25<br><input type="checkbox"/> | <b>EG622283</b>       | <b>180.38</b><br><b>5603</b> | <b>16.1</b><br><b>99</b> | <b>68</b> | 4.1977<br>90 | -- | -- | --                           | predicted gene, EG622283                                                                                                 |  |  |
| 26<br><input type="checkbox"/> | <b>Gm6307</b>         | <b>180.38</b><br><b>5603</b> | <b>16.1</b><br><b>99</b> | <b>68</b> | 4.1977<br>90 | -- | -- | --                           | predicted gene 6307 (Gm6307), long non-coding RNA.                                                                       |  |  |
| 27<br><input type="checkbox"/> | <b>Mir1a-1</b>      | <b>180.38</b><br><b>9047</b> | <b>0.07</b><br><b>7</b>  | 0         | 0            | -- | -- | --                           | microRNA 1a-1 (Mir1a-1), microRNA.                                                                                       |  |  |
| 28<br><input type="checkbox"/> | <b>Mir133a-2</b>    | <b>180.39</b><br><b>8378</b> | <b>0.10</b><br><b>4</b>  | 0         | 0            | -- | -- | --                           | microRNA 133a-2 (Mir133a-2), microRNA.                                                                                   |  |  |
| 29<br><input type="checkbox"/> | <b>AK165607</b>     | <b>180.42</b><br><b>6754</b> | <b>28.0</b><br><b>83</b> | <b>4</b>  | 0.1424<br>35 | -- | -- | --                           | RCB-0035 WEHI-3 cDNA, RIKEN full-length enriched library, clone:G430047L19 product:unclassifiable, full insert sequence. |  |  |
| 30<br><input type="checkbox"/> | <b>Slco4a1</b>      | <b>180.45</b><br><b>6333</b> | <b>18.5</b><br><b>20</b> | <b>3</b>  | 0.1619<br>87 | -- | 20 | <b>31.452</b><br><b>489</b>  | solute carrier organic anion transporter family, member 4a1                                                              |  |  |
| 31<br><input type="checkbox"/> | <b>Ntsr1</b>        | <b>180.49</b><br><b>9975</b> | <b>44.2</b><br><b>44</b> | <b>3</b>  | 0.0678<br>06 | -- | 20 | <b>24.712</b><br><b>268</b>  | neurotensin receptor 1                                                                                                   |  |  |

|                                |                                                                                                          |                        |                    |           |              |    |    |                        |                                                                          |  |  |
|--------------------------------|----------------------------------------------------------------------------------------------------------|------------------------|--------------------|-----------|--------------|----|----|------------------------|--------------------------------------------------------------------------|--|--|
| 32<br><input type="checkbox"/> | <b>1600027N09Rik</b>    | <b>180.58<br/>1303</b> | <b>4.33<br/>1</b>  | <b>12</b> | 2.7707<br>23 | -- | -- | --                     | RIKEN<br>cDNA<br>1600027N09<br>gene                                      |  |  |
| 33<br><input type="checkbox"/> | <b>Mrgbp</b>            | <b>180.58<br/>1303</b> | <b>4.33<br/>1</b>  | <b>12</b> | 2.7707<br>23 | -- | -- | --                     | MRG/MORF<br>4L binding<br>protein<br>(Mrgbp),<br>mRNA.                   |  |  |
| 34<br><input type="checkbox"/> | <b>LOC552877</b>        | <b>180.58<br/>7170</b> | <b>1.52<br/>3</b>  | 0         | 0            | -- | -- | --                     | hypothetical<br>LOC552877                                                |  |  |
| 35<br><input type="checkbox"/> | <b>Ogfr</b>             | <b>180.58<br/>9406</b> | <b>6.42<br/>5</b>  | <b>21</b> | 3.2684<br>82 | -- | 20 | <b>22.746<br/>192</b>  | opioid<br>growth factor<br>receptor                                      |  |  |
| 36<br><input type="checkbox"/> | <b>Col9a3</b>           | <b>180.60<br/>3184</b> | <b>10.2<br/>31</b> | <b>27</b> | 2.6390<br>38 | -- | 20 | <b>3.5839<br/>81</b>   | collagen,<br>type IX,<br>alpha 3                                         |  |  |
| 37<br><input type="checkbox"/> | <b>Tcf15</b>            | <b>180.62<br/>1956</b> | <b>20.7<br/>35</b> | <b>5</b>  | 0.2411<br>38 | -- | 20 | <b>154.98<br/>3125</b> | transcription<br>factor-like 5<br>(basic helix-<br>loop-helix)           |  |  |
| 38<br><input type="checkbox"/> | <b>Dido1</b>          | <b>180.68<br/>0953</b> | <b>29.0<br/>46</b> | <b>12</b> | 0.4131<br>38 | -- | -- | --                     | death<br>inducer-<br>obliterator 1                                       |  |  |
| 39<br><input type="checkbox"/> | <b>C130092D22Rik</b>  | <b>180.70<br/>3199</b> | <b>1.49<br/>3</b>  | 0         | 0            | -- | -- | --                     | RIKEN<br>cDNA<br>C130092D22<br>gene                                      |  |  |
| 40<br><input type="checkbox"/> | <b>Gid8</b>           | <b>180.71<br/>0327</b> | <b>11.2<br/>72</b> | <b>3</b>  | 0.2661<br>46 | -- | -- | --                     | GID complex<br>subunit 8<br>(Gid8),<br>transcript<br>variant 2,<br>mRNA. |  |  |
| 41<br><input type="checkbox"/> | <b>2310003C23Rik</b>  | <b>180.71<br/>2545</b> | <b>5.97<br/>2</b>  | <b>2</b>  | 0.3348<br>96 | -- | -- | --                     | RIKEN<br>cDNA<br>2310003C23<br>gene                                      |  |  |
| 42<br><input type="checkbox"/> | <b>1700019H03Rik</b>  | <b>180.72<br/>5338</b> | <b>16.9<br/>40</b> | <b>4</b>  | 0.2361<br>28 | -- | -- | --                     | RIKEN<br>cDNA<br>1700019H03<br>gene                                      |  |  |
| 43<br><input type="checkbox"/> | <b>Slc17a9</b>        | <b>180.72<br/>5338</b> | <b>16.9<br/>40</b> | <b>4</b>  | 0.2361<br>28 | -- | -- | --                     | solute carrier<br>family 17,<br>member 9<br>(Slc17a9),<br>mRNA.          |  |  |
| 44<br><input type="checkbox"/> | <b>Bhlhe23</b>        | <b>180.77<br/>4380</b> | <b>2.52<br/>0</b>  | 0         | 0            | -- | -- | --                     | basic helix-<br>loop-helix                                               |  |  |

|                                |                                                                                                                     |                              |                          |           |              |    |    |                             |                                                                                                                                                                                    |  |  |
|--------------------------------|---------------------------------------------------------------------------------------------------------------------|------------------------------|--------------------------|-----------|--------------|----|----|-----------------------------|------------------------------------------------------------------------------------------------------------------------------------------------------------------------------------|--|--|
|                                |                                                                                                                     |                              |                          |           |              |    |    |                             | family,<br>member e23<br>(Bhlhe23),<br>mRNA.                                                                                                                                       |  |  |
| 45<br><input type="checkbox"/> | <b>Bhlhb4</b>                      | <b>180.77</b><br><b>4657</b> | <b>2.24</b><br><b>3</b>  | 0         | 0            | -- | -- | --                          | basic helix-<br>loop-helix<br>domain<br>containing,<br>class B4                                                                                                                    |  |  |
| 46<br><input type="checkbox"/> | <b>AK045142</b>                    | <b>180.82</b><br><b>9489</b> | <b>60.2</b><br><b>24</b> | <b>25</b> | 0.4151<br>17 | -- | -- | --                          | 9.5 days<br>embryo<br>parthenogeno<br>te cDNA,<br>RIKEN full-<br>length<br>enriched<br>library,<br>clone:B1300<br>39P15<br>product:uncla<br>ssifiable, full<br>insert<br>sequence. |  |  |
| 47<br><input type="checkbox"/> | <b>2810461L1</b><br><b>6Rik</b>  | <b>180.89</b><br><b>0683</b> | <b>0.28</b><br><b>3</b>  | 0         | 0            | -- | -- | --                          | RIKEN<br>cDNA<br>2810461L16<br>gene                                                                                                                                                |  |  |
| 48<br><input type="checkbox"/> | <b>Mir124a-</b><br><b>3</b>      | <b>180.89</b><br><b>4039</b> | <b>0.06</b><br><b>8</b>  | 0         | 0            | -- | -- | --                          | microRNA<br>124a-3<br>(Mir124a-3),<br>microRNA.                                                                                                                                    |  |  |
| 49<br><input type="checkbox"/> | <b>Ythdf1</b>                    | <b>180.90</b><br><b>4376</b> | <b>16.5</b><br><b>60</b> | <b>4</b>  | 0.2415<br>46 | -- | 20 | <b>61.297</b><br><b>228</b> | YTH domain<br>family 1                                                                                                                                                             |  |  |
| 50<br><input type="checkbox"/> | <b>4833420G</b><br><b>11Rik</b>  | <b>180.91</b><br><b>5362</b> | <b>0.05</b><br><b>0</b>  | 0         | 0            | -- | -- | --                          | RIKEN<br>cDNA<br>4833420G11<br>gene                                                                                                                                                |  |  |
| 51<br><input type="checkbox"/> | <b>Birc7</b>                     | <b>180.92</b><br><b>9022</b> | <b>4.98</b><br><b>8</b>  | 0         | 0            | -- | 20 | <b>48.430</b><br><b>955</b> | baculoviral<br>IAP repeat-<br>containing 7<br>(livin)                                                                                                                              |  |  |
| 52<br><input type="checkbox"/> | <b>Nkain4</b>                    | <b>180.93</b><br><b>4771</b> | <b>19.9</b><br><b>28</b> | 0         | 0            | -- | -- | --                          | Na <sup>+</sup> /K <sup>+</sup><br>transporting<br>ATPase<br>interacting 4                                                                                                         |  |  |
| 53<br><input type="checkbox"/> | <b>AK040057</b>                  | <b>180.95</b><br><b>4463</b> | <b>12.3</b><br><b>49</b> | <b>2</b>  | 0.1619<br>56 | -- | -- | --                          | 0 day neonate<br>thymus<br>cDNA,<br>RIKEN full-<br>length<br>enriched                                                                                                              |  |  |

|                                |                                 |                              |                          |                       |              |    |    |                             |                                                                                                                                                                                                      |  |  |
|--------------------------------|---------------------------------|------------------------------|--------------------------|-----------------------|--------------|----|----|-----------------------------|------------------------------------------------------------------------------------------------------------------------------------------------------------------------------------------------------|--|--|
|                                |                                 |                              |                          |                       |              |    |    |                             | library,<br>clone:A4300<br>53N14<br>product:uncla<br>ssifiable, full<br>insert<br>sequence.                                                                                                          |  |  |
| 54<br><input type="checkbox"/> | <b>Arfgap1</b>                  | <b>180.96</b><br><b>7299</b> | <b>15.2</b><br><b>25</b> | <b>9</b>              | 0.5911<br>33 | -- | 20 | <b>45.039</b><br><b>223</b> | ADP-<br>ribosylation<br>factor<br>GTPase<br>activating<br>protein 1                                                                                                                                  |  |  |
| 55<br><input type="checkbox"/> | <b>AK030308</b>                 | <b>180.98</b><br><b>4231</b> | <b>3.04</b><br><b>4</b>  | <b>3</b>              | 0.9855<br>45 | -- | -- | --                          | 11 days<br>pregnant<br>adult female<br>ovary and<br>uterus cDNA,<br>RIKEN full-<br>length<br>enriched<br>library,<br>clone:503141<br>8M13<br>product:uncla<br>ssifiable, full<br>insert<br>sequence. |  |  |
| 56<br><input type="checkbox"/> | <b>9230112E0</b><br><b>8Rik</b> | <b>180.98</b><br><b>4414</b> | <b>2.85</b><br><b>7</b>  | <b>2</b>              | 0.7000<br>35 | -- | -- | --                          | RIKEN<br>cDNA<br>9230112E08<br>gene                                                                                                                                                                  |  |  |
| 57<br><input type="checkbox"/> | <b>Col20a1</b>                  | <b>180.98</b><br><b>6534</b> | <b>31.0</b><br><b>06</b> | <b>11</b><br><b>2</b> | 3.612<br>204 | -- | -- | --                          | collagen,<br>type XX,<br>alpha 1                                                                                                                                                                     |  |  |

Supplemental Table S7. Candidate gene for eQTL on chr5 in male for Tmprss2

| Ind<br>ex | Symbol | Mb<br>Start | Len<br>gth<br>(Kb) | SN<br>P<br>Co<br>unt | SNP<br>Den<br>sity | Av<br>g | Hu<br>ma<br>n<br>Chr | Mb<br>Start<br>(hg19<br>) | Gene<br>Description | Polym<br>iRTS<br>Datab | Gen<br>e<br>Wea<br>ver |
|-----------|--------|-------------|--------------------|----------------------|--------------------|---------|----------------------|---------------------------|---------------------|------------------------|------------------------|
|           |        |             |                    |                      |                    |         |                      |                           |                     |                        |                        |

|                                |                                                                                                               |                        |  |  |              | Ex<br>pr |  |  |                                                                                 | ase<br>>> | Info<br>Cont<br>ent<br>>> |
|--------------------------------|---------------------------------------------------------------------------------------------------------------|------------------------|-----------------------------------------------------------------------------------|-----------------------------------------------------------------------------------|--------------|----------|-----------------------------------------------------------------------------------|-----------------------------------------------------------------------------------|---------------------------------------------------------------------------------|-----------|---------------------------|
| 1<br><input type="checkbox"/>  | <b>Gusb</b>                  | <b>129.98<br/>9020</b> | <b>13.8<br/>08</b>                                                                | 0                                                                                 | 0            | --       | 7                                                                                 | <b>64.86<br/>9824</b>                                                             | glucuronidase,<br>beta                                                          |           |                           |
| 2<br><input type="checkbox"/>  | <b>Asl</b>                   | <b>130.01<br/>1502</b> | <b>12.8<br/>29</b>                                                                | <b>2</b>                                                                          | 0.1558<br>97 | --       | 7                                                                                 | <b>64.98<br/>4963</b>                                                             | argininosuccinat<br>e lyase                                                     |           |                           |
| 3<br><input type="checkbox"/>  | <b>AK212710</b>              | <b>130.02<br/>4182</b> | <b>0.06<br/>8</b>                                                                 | 0                                                                                 | 0            | --       | --                                                                                | --                                                                                | cDNA,<br>clone:Y2G0125<br>N20,<br>strand:unspecifi<br>ed.                       |           |                           |
| 4<br><input type="checkbox"/>  | <b>Crcp</b>                  | <b>130.02<br/>9305</b> | <b>31.4<br/>78</b>                                                                | 0                                                                                 | 0            | --       | --                                                                                | --                                                                                | calcitonin gene-<br>related peptide-<br>receptor<br>component<br>protein        |           |                           |
| 5<br><input type="checkbox"/>  | <b>Tpst1</b>                 | <b>130.07<br/>9369</b> | <b>56.3<br/>64</b>                                                                | <b>5</b>                                                                          | 0.0887<br>09 | --       | 7                                                                                 | <b>65.11<br/>4463</b>                                                             | protein-tyrosine<br>sulfotransferase<br>1                                       |           |                           |
| 6<br><input type="checkbox"/>  | <b>2210412B<br/>16Rik</b>  | <b>130.13<br/>1326</b> | <b>0.49<br/>8</b>                                                                 | 0                                                                                 | 0            | --       | --                                                                                | --                                                                                | RIKEN cDNA<br>2210412B16<br>gene                                                |           |                           |
| 7<br><input type="checkbox"/>  | <b>4930487N<br/>04Rik</b>  | <b>130.14<br/>3318</b> | <b>1.35<br/>7</b>                                                                 | 0                                                                                 | 0            | --       | --                                                                                | --                                                                                | RIKEN cDNA<br>4930487N04<br>gene                                                |           |                           |
| 8<br><input type="checkbox"/>  | <b>Kctd7</b>               | <b>130.14<br/>4887</b> | <b>10.9<br/>21</b>                                                                | <b>3</b>                                                                          | 0.2747<br>00 | --       | 7                                                                                 | <b>65.53<br/>8094</b>                                                             | potassium<br>channel<br>tetramerisation<br>domain<br>containing 7               |           |                           |
| 9<br><input type="checkbox"/>  | <b>Rabgef1</b>             | <b>130.17<br/>1818</b> | <b>42.5<br/>19</b>                                                                | <b>11<br/>5</b>                                                                   | 2.7046<br>73 | --       | 7                                                                                 | <b>65.64<br/>9869</b>                                                             | RAB guanine<br>nucleotide<br>exchange factor<br>(GEF) 1                         |           |                           |
| 10<br><input type="checkbox"/> | <b>0610007L<br/>01Rik</b>  | <b>130.21<br/>9743</b> | <b>24.0<br/>22</b>                                                                | <b>20</b>                                                                         | 0.8325<br>70 | --       | --                                                                                | --                                                                                | RIKEN cDNA<br>0610007L01<br>gene                                                |           |                           |
| 11<br><input type="checkbox"/> | <b>Tmem248</b>             | <b>130.21<br/>9743</b> | <b>24.0<br/>22</b>                                                                | <b>20</b>                                                                         | 0.8325<br>70 | --       | --                                                                                | --                                                                                | transmembrane<br>protein 248<br>(Tmem248),<br>transcript<br>variant 2,<br>mRNA. |           |                           |
| 12<br><input type="checkbox"/> | <b>EG625540</b>            | <b>130.22<br/>0458</b> | <b>2.60<br/>7</b>                                                                 | <b>5</b>                                                                          | 1.9179<br>13 | --       | --                                                                                | --                                                                                | predicted gene,<br>EG625540                                                     |           |                           |



|                                |                                                                                                                     |                              |                           |                       |              |    |    |                             |                                                               |  |  |
|--------------------------------|---------------------------------------------------------------------------------------------------------------------|------------------------------|---------------------------|-----------------------|--------------|----|----|-----------------------------|---------------------------------------------------------------|--|--|
| 13<br><input type="checkbox"/> | <b>Sbds</b>                        | <b>130.24</b><br><b>5731</b> | <b>9.79</b><br><b>9</b>   | <b>7</b>              | 0.7143<br>59 | -- | 7  | <b>65.89</b><br><b>6839</b> | SBDS ribosome assembly guanine nucleotide exchange factor     |  |  |
| 14<br><input type="checkbox"/> | <b>Tyw1</b>                        | <b>130.25</b><br><b>7036</b> | <b>84.5</b><br><b>31</b>  | <b>13</b><br><b>0</b> | 1.5378<br>97 | -- | -- | --                          | tRNA-yW synthesizing protein 1 homolog (S. cerevisiae)        |  |  |
| 15<br><input type="checkbox"/> | <b>A330070K</b><br><b>13Rik</b>    | <b>130.37</b><br><b>8850</b> | <b>5.78</b><br><b>1</b>   | <b>2</b>              | 0.3459<br>61 | -- | -- | --                          | RIKEN cDNA A330070K13 gene                                    |  |  |
| 16<br><input type="checkbox"/> | <b>Caln1</b>                       | <b>130.44</b><br><b>8124</b> | <b>392.</b><br><b>521</b> | <b>15</b>             | 0.0382<br>15 | -- | 7  | <b>70.69</b><br><b>2565</b> | calneuron 1                                                   |  |  |
| 17<br><input type="checkbox"/> | <b>C030007I0</b><br><b>1Rik</b>    | <b>130.65</b><br><b>3423</b> | <b>0.05</b><br><b>0</b>   | 0                     | 0            | -- | -- | --                          | RIKEN cDNA C030007I01 gene                                    |  |  |
| 18<br><input type="checkbox"/> | <b>Wbscr17</b>                   | <b>130.87</b><br><b>4950</b> | <b>432.</b><br><b>572</b> | <b>9</b>              | 0.0208<br>06 | -- | 7  | <b>70.04</b><br><b>2439</b> | Williams-Beuren syndrome chromosome region 17 homolog (human) |  |  |
| 19<br><input type="checkbox"/> | <b>Gcap8</b>                     | <b>130.95</b><br><b>8922</b> | <b>1.11</b><br><b>3</b>   | 0                     | 0            | -- | -- | --                          | granule cell antiserum positive 8                             |  |  |
| 20<br><input type="checkbox"/> | <b>LOC54580</b><br><b>9</b>      | <b>131.39</b><br><b>1600</b> | <b>23.1</b><br><b>18</b>  | 0                     | 0            | -- | -- | --                          | hypothetical protein LOC545809                                |  |  |
| 21<br><input type="checkbox"/> | <b>Autis2</b>                    | <b>131.43</b><br><b>7681</b> | <b>37.4</b><br><b>92</b>  | <b>6</b>              | 0.1600<br>34 | -- | 7  | <b>68.50</b><br><b>8556</b> | autism susceptibility candidate 2                             |  |  |
| 22<br><input type="checkbox"/> | <b>3110001N</b><br><b>23Rik</b>  | <b>131.52</b><br><b>4950</b> | <b>0.71</b><br><b>3</b>   | 0                     | 0            | -- | -- | --                          | RIKEN cDNA 3110001N23 gene                                    |  |  |
| 23<br><input type="checkbox"/> | <b>9330177L</b><br><b>23Rik</b>  | <b>131.59</b><br><b>3811</b> | <b>1.10</b><br><b>0</b>   | 0                     | 0            | -- | -- | --                          | RIKEN cDNA 9330177L23 gene                                    |  |  |
| 24<br><input type="checkbox"/> | <b>2810432F</b><br><b>15Rik</b>  | <b>131.62</b><br><b>4841</b> | <b>0.70</b><br><b>0</b>   | 0                     | 0            | -- | -- | --                          | RIKEN cDNA 2810432F15 gene                                    |  |  |
| 25<br><input type="checkbox"/> | <b>4930563F</b><br><b>08Rik</b>  | <b>131.88</b><br><b>0268</b> | <b>3.50</b><br><b>0</b>   | <b>3</b>              | 0.8571<br>43 | -- | -- | --                          | RIKEN cDNA 4930563F08 gene                                    |  |  |
| 26<br><input type="checkbox"/> | <b>C230071H</b><br><b>17Rik</b>  | <b>131.88</b><br><b>2965</b> | <b>2.16</b><br><b>1</b>   | <b>1</b>              | 0.4627<br>49 | -- | -- | --                          | RIKEN cDNA C230071H17 gene                                    |  |  |

|                                |                                                                                                                   |                              |                          |          |              |    |    |    |                                                                                                                                                                    |  |  |
|--------------------------------|-------------------------------------------------------------------------------------------------------------------|------------------------------|--------------------------|----------|--------------|----|----|----|--------------------------------------------------------------------------------------------------------------------------------------------------------------------|--|--|
| 27<br><input type="checkbox"/> | <b>AL023051</b>                  | <b>131.93</b><br><b>2395</b> | <b>2.28</b><br><b>4</b>  | 0        | 0            | -- | -- | -- | expressed<br>sequence<br>AL023051                                                                                                                                  |  |  |
| 28<br><input type="checkbox"/> | <b>AK140583</b>                  | <b>131.98</b><br><b>8009</b> | <b>4.07</b><br><b>6</b>  | 0        | 0            | -- | -- | -- | 10 days neonate<br>cerebellum<br>cDNA, RIKEN<br>full-length<br>enriched library,<br>clone:B930034J<br>01<br>product:hypothetical protein, full<br>insert sequence. |  |  |
| 29<br><input type="checkbox"/> | <b>2610011E</b><br><b>03Rik</b>  | <b>131.99</b><br><b>6178</b> | <b>2.23</b><br><b>5</b>  | 0        | 0            | -- | -- | -- | RIKEN cDNA<br>2610011E03<br>gene                                                                                                                                   |  |  |
| 30<br><input type="checkbox"/> | <b>AK076755</b>                 | <b>133.53</b><br><b>4589</b> | <b>63.8</b><br><b>17</b> | <b>2</b> | 0.03<br>1340 | -- | -- | -- | adult male<br>testis cDNA,<br>RIKEN full-<br>length<br>enriched<br>library,<br>clone:49304<br>32F18<br>product:unclassified,<br>full insert<br>sequence.           |  |  |

**Supplemental Table S8. Top 100 genes in female for 3 probes in Ace2**

|                               | Dataset<br>⌵⌶ | Trait ID<br>⌵⌶               | Symbol<br>⌵⌶    | Description<br>⌵⌶                                                                           | Location<br>⌵⌶    | Mean<br>⌵⌶ | N Cases<br>⌵⌶ | Max LRS?<br>⌵⌶ | Max LRS Location Chr and Mb<br>⌵⌶ | Ad d?<br>⌵⌶ |
|-------------------------------|---------------|------------------------------|-----------------|---------------------------------------------------------------------------------------------|-------------------|------------|---------------|----------------|-----------------------------------|-------------|
| 1<br><input type="checkbox"/> | MA_M2F_0706_R | <a href="#">1425103_at</a>   | <u>Ace2</u>     | angiotensin I converting enzyme (peptidyl-dipeptidase A) 2; middle to distal 3'-UTR         | ChrX: 164.187853  | 10.112     | 65            | 17.2           | Chr16: 73.747956                  | -0.131      |
| 2<br><input type="checkbox"/> | MA_M2F_0706_R | <a href="#">1425102_a_at</a> | <u>Ace2</u>     | angiotensin I converting enzyme (peptidyl-dipeptidase A) 2; 3'-UTR and last 4 exons         | ChrX: 164.182645  | 10.046     | 65            | 12.7           | Chr14: 3.000000                   | 0.186       |
| 3<br><input type="checkbox"/> | MA_M2F_0706_R | <a href="#">1417530_a_at</a> | <u>Srp9</u>     | signal recognition particle 9                                                               | Chr1: 182.131342  | 11.639     | 65            | 11.0           | Chr8: 25.520489                   | -0.102      |
| 4<br><input type="checkbox"/> | MA_M2F_0706_R | <a href="#">1422789_at</a>   | <u>Aldh1a2</u>  | aldehyde dehydrogenase family 1, subfamily A2; 3' UTR                                       | Chr9: 71.295684   | 7.918      | 65            | 18.5           | Chr17: 21.686210                  | -0.180      |
| 5<br><input type="checkbox"/> | MA_M2F_0706_R | <a href="#">1415683_at</a>   | <u>Nmt1</u>     | N-myristoyltransferase 1; exons 10 and 11, and 3' UTR                                       | Chr11: 103.064733 | 11.775     | 65            | 11.8           | Chr10: 24.000000                  | 0.085       |
| 6<br><input type="checkbox"/> | MA_M2F_0706_R | <a href="#">1434037_s_at</a> | <u>Kat2b</u>    | K(lysine) acetyltransferase 2B (p300/CREB-binding protein-associated factor); distal 3' UTR | Chr17: 53.672145  | 11.464     | 65            | 14.0           | Chr10: 19.937470                  | 0.095       |
| 7<br><input type="checkbox"/> | MA_M2F_0706_R | <a href="#">1428969_at</a>   | <u>Kiaa1012</u> | protein TRS85 homolog (ER-Golgi transport); 3' UTR                                          | Chr18: 20.817479  | 11.054     | 65            | 11.4           | Chr14: 3.000000                   | 0.101       |
| 8<br><input type="checkbox"/> | MA_M2F_0706_R | <a href="#">1416678_at</a>   | <u>Cops3</u>    | COP9 (constitutive photomorphogenic) homolog, subunit 3; last four exons and 3' UTR         | Chr11: 59.817915  | 11.640     | 65            | 9.5            | Chr9: 107.639250                  | 0.087       |
| 9<br><input type="checkbox"/> | MA_M2F_0706_R | <a href="#">1416472_at</a>   | <u>Syap1</u>    | synapse associated protein 1; mid-distal 3' UTR                                             | ChrX: 162.857076  | 12.641     | 65            | 9.9            | Chr16: 85.961783                  | -0.079      |

|                                |               |                              |                               |                                                                                               |                  |        |    |      |                  |        |
|--------------------------------|---------------|------------------------------|-------------------------------|-----------------------------------------------------------------------------------------------|------------------|--------|----|------|------------------|--------|
| 10<br><input type="checkbox"/> | MA_M2F_0706_R | <a href="#">1453880_s_at</a> | <a href="#">1700041C02Rik</a> | RIKEN cDNA 1700041C02 gene                                                                    | Chr4: 119.377209 | 5.871  | 65 | 16.6 | Chr9: 88.498812  | 0.035  |
| 11<br><input type="checkbox"/> | MA_M2F_0706_R | <a href="#">1437391_x_at</a> | <a href="#">Mrpl44</a>        | mitochondrial ribosomal protein L44                                                           | Chr1: 79.781249  | 11.205 | 65 | 26.3 | Chr15: 89.576205 | 0.191  |
| 12<br><input type="checkbox"/> | MA_M2F_0706_R | <a href="#">1423486_at</a>   | <a href="#">Cript</a>         | postsynaptic protein CRIPT (cysteine-rich PDZ-binding protein); last several exons and 3' UTR | Chr17: 87.034276 | 12.203 | 65 | 10.2 | Chr15: 87.476581 | 0.079  |
| 13<br><input type="checkbox"/> | MA_M2F_0706_R | <a href="#">1415749_a_at</a> | <a href="#">Rragc</a>         | Ras-related GTP binding C; mid-distal 3' UTR                                                  | Chr4: 123.936450 | 12.155 | 65 | 16.6 | Chr9: 88.498812  | 0.093  |
| 14<br><input type="checkbox"/> | MA_M2F_0706_R | <a href="#">1420138_at</a>   | <a href="#">Slc19a1</a>       | solute carrier family 19 (sodium/hydrogen exchanger), member 1                                | Chr10: 77.050144 | 11.889 | 65 | 9.5  | Chr15: 95.949674 | 0.113  |
| 15<br><input type="checkbox"/> | MA_M2F_0706_R | <a href="#">1452086_at</a>   | <a href="#">2610027O18Rik</a> | RIKEN cDNA 2610027O18 gene                                                                    | Chr12: 73.280555 | 7.543  | 65 | 13.9 | Chr9: 99.750326  | 0.052  |
| 16<br><input type="checkbox"/> | MA_M2F_0706_R | <a href="#">1424209_at</a>   | <a href="#">Rarsl</a>         | arginyl-tRNA synthetase-like; exons 15, 16, 17, 18 19, 20                                     | Chr4: 34.656065  | 10.679 | 65 | 14.4 | Chr2: 170.826972 | 0.084  |
| 17<br><input type="checkbox"/> | MA_M2F_0706_R | <a href="#">1448238_at</a>   | <a href="#">C14orf16_6</a>    | CLE7 homolog (UPF0568 protein); 3' half                                                       | Chr14: 19.812115 | 12.645 | 65 | 11.2 | Chr16: 73.747956 | -0.086 |
| 18<br><input type="checkbox"/> | MA_M2F_0706_R | <a href="#">1417054_a_at</a> | <a href="#">Sf3b14</a>        | splicing factor 3B, 14 kDa subunit; last 2 exons and proximal 3' UTR                          | Chr12: 4.826831  | 12.053 | 65 | 10.6 | Chr15: 91.405127 | 0.147  |
| 19<br><input type="checkbox"/> | MA_M2F_0706_R | <a href="#">1448206_at</a>   | <a href="#">Psm2</a>          | proteasome (prosome, macropain) subunit, alpha type 2; last five exons and 3' UTR             | Chr13: 14.619304 | 13.033 | 65 | 9.7  | Chr16: 74.917702 | -0.079 |
| 20<br><input type="checkbox"/> | MA_M2F_0706_R | <a href="#">1421118_a_at</a> | <a href="#">Gpr56</a>         | G protein-coupled receptor 56; 3' UTR                                                         | Chr8: 95.013029  | 11.029 | 65 | 11.5 | Chr19: 15.292517 | 0.172  |
| 21<br><input type="checkbox"/> | MA_M2F_0706_R | <a href="#">1437450_x_at</a> | <a href="#">C14orf16_6</a>    | CLE7 homolog (UPF0568 protein)                                                                | Chr14: 19.811971 | 12.200 | 65 | 13.4 | Chr16: 73.747956 | -0.104 |

|                                |               |                              |                             |                                                                                                |                   |        |    |      |                   |        |
|--------------------------------|---------------|------------------------------|-----------------------------|------------------------------------------------------------------------------------------------|-------------------|--------|----|------|-------------------|--------|
| 22<br><input type="checkbox"/> | MA_M2F_0706_R | <a href="#">1433545_s_at</a> | <i><u>Acad11</u></i>        | acyl-Coenzyme A dehydrogenase family, member 11; mid distal 3' UTR                             | Chr9: 104.127137  | 13.085 | 65 | 14.4 | Chr9: 99.750326   | 0.129  |
| 23<br><input type="checkbox"/> | MA_M2F_0706_R | <a href="#">1434665_at</a>   | <i><u>Aga</u></i>           | aspartylglucosaminidase; exons 6, 7, and 8                                                     | Chr8: 53.521136   | 10.853 | 65 | 11.1 | Chr9: 88.498812   | 0.110  |
| 24<br><input type="checkbox"/> | MA_M2F_0706_R | <a href="#">1434900_at</a>   | <i><u>Mkl1</u></i>          | MKL (megakaryoblastic leukemia)/myocardin-like 1; mid distal 3' UTR                            | Chr15: 81.012534  | 9.424  | 65 | 16.6 | Chr15: 91.405127  | -0.104 |
| 25<br><input type="checkbox"/> | MA_M2F_0706_R | <a href="#">1423711_at</a>   | <i><u>Ndutf1</u></i>        | NADH dehydrogenase (ubiquinone) 1 alpha subcomplex, assembly factor 1; last 3 exons and 3' UTR | Chr2: 119.655607  | 9.734  | 65 | 11.6 | Chr14: 3.000000   | 0.134  |
| 26<br><input type="checkbox"/> | MA_M2F_0706_R | <a href="#">1424700_at</a>   | <i><u>Tmem38b</u></i>       | transmembrane protein 38B (trimeric intracellular cation channel type B); last exon            | Chr4: 53.859998   | 12.660 | 65 | 13.8 | Chr16: 73.747956  | 0.124  |
| 27<br><input type="checkbox"/> | MA_M2F_0706_R | <a href="#">1424828_a_at</a> | <i><u>Fh1</u></i>           | fumarate hydratase, mitochondrial (fumarase); exons 8, 9, and 10, and proximal 3' UTR          | Chr1: 175.601417  | 13.455 | 65 | 12.0 | Chr1: 163.338902  | 0.068  |
| 28<br><input type="checkbox"/> | MA_M2F_0706_R | <a href="#">1416596_at</a>   | <i><u>Slc44a4</u></i>       | solute carrier family 44, member 4 (choline transporter-like); last five exons                 | Chr17: 34.928445  | 12.257 | 65 | 11.7 | Chr9: 107.639250  | 0.119  |
| 29<br><input type="checkbox"/> | MA_M2F_0706_R | <a href="#">1448102_a_at</a> | <i><u>Wdr61</u></i>         | WD repeat domain 61; mid proximal 3' UTR                                                       | Chr9: 54.717273   | 11.646 | 65 | 9.4  | Chr4: 96.896949   | 0.109  |
| 30<br><input type="checkbox"/> | MA_M2F_0706_R | <a href="#">1415783_at</a>   | <i><u>Vps35</u></i>         | vacuolar protein sorting 35; 3' UTR                                                            | Chr8: 85.260458   | 13.460 | 65 | 11.6 | Chr16: 73.747956  | -0.090 |
| 31<br><input type="checkbox"/> | MA_M2F_0706_R | <a href="#">1452737_at</a>   | <i><u>Smim15</u></i>        | small integral membrane protein 15; 3' UTR                                                     | Chr13: 108.048608 | 11.910 | 65 | 10.4 | Chr10: 116.640226 | -0.115 |
| 32<br><input type="checkbox"/> | MA_M2F_0706_R | <a href="#">1460131_at</a>   | <i><u>2810040C05Rik</u></i> | RIKEN cDNA 2810040C05 gene                                                                     | Chr8: 26.131805   | 6.936  | 65 | 12.6 | Chr9: 99.750326   | -0.048 |

|    |                          |               |                              |                 |                                                                                |                   |        |    |      |                  |        |
|----|--------------------------|---------------|------------------------------|-----------------|--------------------------------------------------------------------------------|-------------------|--------|----|------|------------------|--------|
| 33 | <input type="checkbox"/> | MA_M2F_0706_R | <a href="#">1430500_s_at</a> | <u>Mtx2</u>     | metaxin 2; 3 exons                                                             | Chr2: 74.869348   | 11.466 | 65 | 15.1 | Chr4: 96.896949  | 0.137  |
| 34 | <input type="checkbox"/> | MA_M2F_0706_R | <a href="#">1416270_at</a>   | <u>Polr2g</u>   | polymerase (RNA) II (DNA directed) polypeptide G; exons 3, 4, 5, 7, and 3' UTR | Chr19: 8.793198   | 11.581 | 65 | 10.6 | Chr16: 89.532874 | -0.080 |
| 35 | <input type="checkbox"/> | MA_M2F_0706_R | <a href="#">1417710_at</a>   | <u>Mettl9</u>   | methyltransferase like 9; last exon and proximal half of 3' UTR                | Chr7: 121.076249  | 12.659 | 65 | 11.3 | Chr1: 73.418156  | 0.085  |
| 36 | <input type="checkbox"/> | MA_M2F_0706_R | <a href="#">1421185_at</a>   | <u>UbiE2</u>    | RIKEN cDNA 3300001H21 gene                                                     | Chr15: 100.328217 | 7.776  | 65 | 13.4 | Chr9: 94.904747  | -0.095 |
| 37 | <input type="checkbox"/> | MA_M2F_0706_R | <a href="#">1416096_at</a>   | <u>AI413782</u> | protein LOC63894; mid 3' UTR                                                   | Chr12: 87.239058  | 10.350 | 65 | 9.7  | Chr9: 107.824821 | 0.081  |
| 38 | <input type="checkbox"/> | MA_M2F_0706_R | <a href="#">1451719_at</a>   | <u>Crsp6</u>    | cofactor required for Sp1 transcriptional activation, subunit 6                | Chr9: 15.260462   | 6.667  | 65 | 15.3 | Chr16: 17.412078 | 0.058  |
| 39 | <input type="checkbox"/> | MA_M2F_0706_R | <a href="#">1428645_at</a>   | <u>Gnai3</u>    | guanine nucleotide binding protein, alpha inhibiting 3; distal 3' UTR          | Chr3: 108.107540  | 11.397 | 65 | 14.1 | Chr3: 134.523036 | -0.140 |
| 40 | <input type="checkbox"/> | MA_M2F_0706_R | <a href="#">1434587_x_at</a> | <u>Ptdss2</u>   | phosphatidylserine synthase 2                                                  | Chr7: 141.155733  | 10.985 | 65 | 11.4 | Chr4: 141.236455 | -0.065 |
| 41 | <input type="checkbox"/> | MA_M2F_0706_R | <a href="#">1438018_at</a>   | <u>Hook1</u>    | hook 1 (microtubule linker, endocytic membrane trafficking); distal 3' UTR     | Chr4: 96.024792   | 11.882 | 65 | 12.1 | Chr15: 91.405127 | 0.126  |
| 42 | <input type="checkbox"/> | MA_M2F_0706_R | <a href="#">1455286_at</a>   | <u>Btbd1</u>    | BTB (POZ) domain containing 1; distal 3' UTR                                   | Chr7: 81.792103   | 12.326 | 65 | 10.4 | Chr16: 88.032782 | -0.085 |
| 43 | <input type="checkbox"/> | MA_M2F_0706_R | <a href="#">1456015_x_at</a> | <u>Ndufv1</u>   | NADH dehydrogenase (ubiquinone) flavoprotein 1; last exon and 3' UTR           | Chr19: 4.007528   | 14.611 | 65 | 14.0 | Chr3: 129.482611 | -0.098 |
| 44 | <input type="checkbox"/> | MA_M2F_0706_R | <a href="#">1429088_at</a>   | <u>Lbh</u>      | limb bud and heart development (lupus brain antigen 1); distal 3' UTR          | Chr17: 72.941355  | 9.300  | 65 | 10.8 | Chr6: 44.030269  | 0.158  |

|    |               |                              |                             |                                                                                                                                                     |                  |            |    |      |                  |                |
|----|---------------|------------------------------|-----------------------------|-----------------------------------------------------------------------------------------------------------------------------------------------------|------------------|------------|----|------|------------------|----------------|
| 45 | MA_M2F_0706_R | <a href="#">1449135_at</a>   | <u><i>Sox18</i></u>         | SRY-box containing gene 18                                                                                                                          | Chr2: 181.670065 | 9.16<br>2  | 65 | 12.3 | Chr16: 88.032782 | 0.10<br>4      |
| 46 | MA_M2F_0706_R | <a href="#">1421019_at</a>   | <u><i>1700021F05Rik</i></u> | RIKEN cDNA 1700021F05; exons 1 and 3 and 3' UTR                                                                                                     | Chr10: 43.525190 | 10.8<br>35 | 65 | 17.9 | Chr15: 91.405127 | 0.14<br>8      |
| 47 | MA_M2F_0706_R | <a href="#">1431423_a_at</a> | <u><i>Med8</i></u>          | mediator of RNA polymerase II transcription, subunit 8 homolog; last 2 exons and proximal half of 3' UTR                                            | Chr4: 118.413625 | 10.4<br>83 | 65 | 11.9 | Chr4: 102.851020 | 0.10<br>3      |
| 48 | MA_M2F_0706_R | <a href="#">1421164_a_at</a> | <u><i>Arhgef1</i></u>       | Rho guanine nucleotide exchange factor (GEF) 1                                                                                                      | Chr7: 24.925880  | 10.4<br>59 | 65 | 11.7 | Chr4: 81.726726  | -<br>0.09<br>4 |
| 49 | MA_M2F_0706_R | <a href="#">1434038_at</a>   | <u><i>Dnajc13</i></u>       | DnaJ (Hsp40) homolog, subfamily C, member 13                                                                                                        | Chr9: 104.151791 | 11.4<br>26 | 65 | 16.1 | Chr9: 99.750326  | 0.11<br>7      |
| 50 | MA_M2F_0706_R | <a href="#">1421104_at</a>   | <u><i>Mpa2</i></u>          | macrophage activation 2                                                                                                                             | Chr10: 77.268946 | 7.24<br>6  | 65 | 10.7 | Chr19: 23.135216 | -<br>0.05<br>4 |
| 51 | MA_M2F_0706_R | <a href="#">1434447_at</a>   | <u><i>Met</i></u>           | met proto-oncogene; distal 3' UTR                                                                                                                   | Chr6: 17.573398  | 11.7<br>96 | 65 | 12.1 | Chr19: 14.967297 | -<br>0.12<br>4 |
| 52 | MA_M2F_0706_R | <a href="#">1420776_a_at</a> | <u><i>Auh</i></u>           | AU RNA binding protein/enoyl-coenzyme A hydratase (mitochondrial, 3-methylglutaconic aciduria, type I); last four exons and proximal half of 3' UTR | Chr13: 52.835320 | 12.0<br>10 | 65 | 16.4 | Chr13: 51.479103 | 0.10<br>4      |
| 53 | MA_M2F_0706_R | <a href="#">1435966_x_at</a> | <u><i>Mrpl13</i></u>        | mitochondrial ribosomal protein L13; Proximal, mid 3' UTR, and intorn                                                                               | Chr15: 55.534119 | 7.20<br>8  | 65 | 13.9 | Chr18: 82.240604 | -<br>0.12<br>3 |
| 54 | MA_M2F_0706_R | <a href="#">1422880_at</a>   | <u><i>Sypl</i></u>          | synaptophysin-like protein; distal 3' UTR                                                                                                           | Chr12: 32.976333 | 13.1<br>22 | 65 | 11.5 | Chr4: 81.958676  | 0.11<br>7      |
| 55 | MA_M2F_0706_R | <a href="#">1460745_at</a>   | <u><i>A630098A13Rik</i></u> | RIKEN cDNA A630098A13 gene                                                                                                                          | Chr14: 53.961232 | 6.67<br>0  | 65 | 10.2 | Chr7: 89.123287  | -<br>0.03<br>9 |

|                                |               |                              |                        |                                                                                                                                                       |                   |        |    |      |                  |        |
|--------------------------------|---------------|------------------------------|------------------------|-------------------------------------------------------------------------------------------------------------------------------------------------------|-------------------|--------|----|------|------------------|--------|
| 56<br><input type="checkbox"/> | MA_M2F_0706_R | <a href="#">1436139_at</a>   | <u><i>Mdga2</i></u>    | MAM domain containing glycosylphosphatidylinositol anchor 2; putative far 3' UTR element                                                              | Chr12: 66.466121  | 5.517  | 65 | 14.0 | Chr6: 3.266392   | 0.023  |
| 57<br><input type="checkbox"/> | MA_M2F_0706_R | <a href="#">1452768_at</a>   | <u><i>Tex261</i></u>   | testis expressed gene 261                                                                                                                             | Chr6: 83.769296   | 10.962 | 65 | 9.9  | Chr16: 67.046635 | 0.101  |
| 58<br><input type="checkbox"/> | MA_M2F_0706_R | <a href="#">1450699_at</a>   | <u><i>Selenbp1</i></u> | selenium binding protein 1                                                                                                                            | Chr3: 94.944489   | 14.224 | 65 | 21.8 | Chr9: 99.750326  | 0.113  |
| 59<br><input type="checkbox"/> | MA_M2F_0706_R | <a href="#">1423651_at</a>   | <u><i>Isca1</i></u>    | iron-sulfur cluster assembly 1 homolog; distal 3' UTR                                                                                                 | Chr13: 21.496566  | 13.170 | 65 | 11.7 | Chr9: 107.824821 | 0.079  |
| 60<br><input type="checkbox"/> | MA_M2F_0706_R | <a href="#">1422854_at</a>   | <u><i>Shc1</i></u>     | src homology 2 domain-containing transforming protein C1                                                                                              | Chr3: 89.429142   | 10.818 | 65 | 15.8 | Chr15: 91.405127 | -0.184 |
| 61<br><input type="checkbox"/> | MA_M2F_0706_R | <a href="#">1415966_a_at</a> | <u><i>Ndufv1</i></u>   | NADH dehydrogenase (ubiquinone) flavoprotein 1; last exon                                                                                             | Chr19: 4.007602   | 14.081 | 65 | 10.1 | Chr16: 73.747956 | -0.097 |
| 62<br><input type="checkbox"/> | MA_M2F_0706_R | <a href="#">1424130_a_at</a> | <u><i>Ptrf</i></u>     | polymerase I and transcript release factor                                                                                                            | Chr11: 100.957029 | 8.882  | 65 | 9.6  | Chr16: 70.194758 | 0.178  |
| 63<br><input type="checkbox"/> | MA_M2F_0706_R | <a href="#">1423781_at</a>   | <u><i>Appbp1</i></u>   | amyloid beta precursor protein binding protein 1; exons 16, 18, 19, 20 and proximal 3' UTR                                                            | Chr8: 104.513201  | 10.361 | 65 | 15.9 | Chr4: 96.896949  | 0.134  |
| 64<br><input type="checkbox"/> | MA_M2F_0706_R | <a href="#">1420495_a_at</a> | <u><i>Vps26</i></u>    | vacuolar protein sorting 26 (retromer complex, involved in retrograde transport of proteins from endosomes to the trans-Golgi network); distal 3' UTR | Chr10: 62.455304  | 11.491 | 65 | 17.2 | Chr5: 99.299507  | 0.078  |
| 65<br><input type="checkbox"/> | MA_M2F_0706_R | <a href="#">1452005_at</a>   | <u><i>Dlat</i></u>     | dihydrolipoamide S-acetyltransferase (E2 component of pyruvate dehydrogenase complex); distal 3' UTR                                                  | Chr9: 50.634731   | 10.157 | 65 | 10.7 | Chr9: 40.213083  | -0.136 |



|                                |               |                              |                       |                                                                                                 |                  |        |    |      |                  |        |
|--------------------------------|---------------|------------------------------|-----------------------|-------------------------------------------------------------------------------------------------|------------------|--------|----|------|------------------|--------|
| 66<br><input type="checkbox"/> | MA_M2F_0706_R | <a href="#">1456748_at</a>   | <i>Nipsnap1</i>       | 4-nitrophenylphosphatase domain and non-neuronal SNAP25-like protein homolog 1; distal 3' UTR   | Chr11: 4.894050  | 11.565 | 65 | 11.3 | Chr9: 83.778825  | 0.146  |
| 67<br><input type="checkbox"/> | MA_M2F_0706_R | <a href="#">1426256_at</a>   | <i>Timm17a</i>        | translocator of inner mitochondrial membrane 17a                                                | Chr1: 135.301708 | 12.121 | 65 | 14.7 | Chr15: 89.576205 | 0.114  |
| 68<br><input type="checkbox"/> | MA_M2F_0706_R | <a href="#">1415813_at</a>   | <i>Api5</i>           | apoptosis inhibitor 5; distal 3' UTR (transQTL on Chr 4 in BXD eye data)                        | Chr2: 94.411933  | 10.893 | 65 | 10.9 | Chr2: 102.660525 | -0.093 |
| 69<br><input type="checkbox"/> | MA_M2F_0706_R | <a href="#">1426529_at</a>   | <i>Tagln2</i>         | transgelin 2; mid and distal 3' UTR                                                             | Chr1: 172.506826 | 12.074 | 65 | 22.4 | Chr1: 172.235364 | -0.174 |
| 70<br><input type="checkbox"/> | MA_M2F_0706_R | <a href="#">1417633_at</a>   | <i>Sod3</i>           | superoxide dismutase 3, extracellular                                                           | Chr5: 52.368952  | 14.321 | 65 | 11.6 | ChrX: 102.126656 | -0.170 |
| 71<br><input type="checkbox"/> | MA_M2F_0706_R | <a href="#">1435178_x_at</a> | <i>Anapc5</i>         | anaphase-promoting complex subunit 5                                                            | Chr5: 11.351956  | 12.933 | 65 | 10.7 | Chr1: 178.015151 | 0.065  |
| 72<br><input type="checkbox"/> | MA_M2F_0706_R | <a href="#">1438208_at</a>   | <i>1110033_K02Rik</i> | ESTs, Highly similar to serine/threonine protein kinase TAO2 [Rattus norvegicus] [R.norvegicus] | Chr7: 126.869685 | 8.377  | 65 | 8.5  | Chr15: 89.576205 | -0.141 |
| 73<br><input type="checkbox"/> | MA_M2F_0706_R | <a href="#">1424918_at</a>   | <i>Tbc1d19</i>        | TBC1 domain family, member 19                                                                   | Chr5: 53.887402  | 10.323 | 65 | 13.8 | ChrX: 71.441039  | -0.142 |
| 74<br><input type="checkbox"/> | MA_M2F_0706_R | <a href="#">1446188_at</a>   | <i>Lrriq2</i>         | leucine-rich repeats and IQ motif containing 2                                                  | Chr16: 55.918903 | 7.194  | 65 | 13.3 | Chr9: 88.498812  | -0.047 |
| 75<br><input type="checkbox"/> | MA_M2F_0706_R | <a href="#">1452812_at</a>   | <i>Lphn1</i>          | latrophilin 1                                                                                   | Chr8: 83.939489  | 8.548  | 65 | 16.5 | Chr4: 86.450967  | -0.133 |
| 76<br><input type="checkbox"/> | MA_M2F_0706_R | <a href="#">1415867_at</a>   | <i>Cct4</i>           | chaperonin subunit 4 (delta); exons 12 and 13 (of 14), long isoform                             | Chr11: 23.002199 | 12.718 | 65 | 14.7 | Chr4: 75.824944  | 0.093  |

|                                |               |                              |                        |                                                                                                          |                   |            |    |      |                  |                |
|--------------------------------|---------------|------------------------------|------------------------|----------------------------------------------------------------------------------------------------------|-------------------|------------|----|------|------------------|----------------|
| 77<br><input type="checkbox"/> | MA_M2F_0706_R | <a href="#">1439029_at</a>   | <u><i>Gpt2</i></u>     | glutamic pyruvate transaminase (alanine aminotransferase) 2                                              | Chr8: 85.523253   | 9.94<br>4  | 65 | 14.3 | Chr19: 23.853320 | 0.21<br>2      |
| 78<br><input type="checkbox"/> | MA_M2F_0706_R | <a href="#">1452662_a_at</a> | <u><i>Elf2s1</i></u>   | eukaryotic translation initiation factor 2, subunit 1 alpha; last two exons and proximal half of 3' UTR  | Chr12: 78.884789  | 10.8<br>39 | 65 | 10.6 | Chr16: 89.532874 | -<br>0.08<br>5 |
| 79<br><input type="checkbox"/> | MA_M2F_0706_R | <a href="#">1450243_a_at</a> | <u><i>Dscr1l1</i></u>  | Down syndrome critical region gene 1-like 1; last three exons                                            | Chr17: 44.017779  | 6.70<br>8  | 65 | 15.1 | Chr15: 91.405127 | -<br>0.08<br>9 |
| 80<br><input type="checkbox"/> | MA_M2F_0706_R | <a href="#">1460295_s_at</a> | <u><i>Il6st</i></u>    | interleukin 6 signal transducer; proximal to mid 3' UTR                                                  | Chr13: 112.505179 | 9.44<br>8  | 65 | 11.2 | Chr15: 91.405127 | -<br>0.17<br>3 |
| 81<br><input type="checkbox"/> | MA_M2F_0706_R | <a href="#">1448736_a_at</a> | <u><i>Hprt</i></u>     | hypoxanthine guanine phosphoribosyl transferase; last exon and 3' UTR                                    | ChrX: 53.021104   | 11.7<br>06 | 65 | 9.4  | Chr2: 83.413222  | -<br>0.06<br>6 |
| 82<br><input type="checkbox"/> | MA_M2F_0706_R | <a href="#">1455604_at</a>   | <u><i>AI427138</i></u> | expressed sequence AI427138; distal 3' UTR                                                               | Chr1: 64.730740   | 8.70<br>2  | 65 | 8.7  | Chr14: 48.527624 | 0.11<br>5      |
| 83<br><input type="checkbox"/> | MA_M2F_0706_R | <a href="#">1431665_a_at</a> | <u><i>Timm8b</i></u>   | translocase of inner mitochondrial membrane 8 homolog b (yeast); 5' UTR, both exons and proximal 3'      | Chr9: 50.604007   | 12.7<br>82 | 65 | 11.1 | Chr4: 96.896949  | 0.12<br>5      |
| 84<br><input type="checkbox"/> | MA_M2F_0706_R | <a href="#">1435636_at</a>   | <u><i>Ago2</i></u>     | argonaute RISC catalytic component 2 (eukaryotic translation initiation factor 2C, 2); distal 3' UTR     | Chr15: 73.099051  | 9.90<br>7  | 65 | 14.1 | Chr15: 89.576205 | -<br>0.12<br>3 |
| 85<br><input type="checkbox"/> | MA_M2F_0706_R | <a href="#">1423044_at</a>   | <u><i>Prosc</i></u>    | proline synthetase co-transcribed                                                                        | Chr8: 27.054003   | 12.8<br>57 | 65 | 13.7 | Chr9: 99.750326  | 0.09<br>6      |
| 86<br><input type="checkbox"/> | MA_M2F_0706_R | <a href="#">1448317_at</a>   | <u><i>Tmem128</i></u>  | transmembrane protein 128; mid 3' UTR                                                                    | Chr5: 38.269083   | 9.65<br>3  | 65 | 12.3 | Chr19: 37.868206 | -<br>0.14<br>5 |
| 87<br><input type="checkbox"/> | MA_M2F_0706_R | <a href="#">1424681_a_at</a> | <u><i>Psm5</i></u>     | proteasome (prosome, macropain) subunit, alpha type 5; putative exon (transQTL on Chr 4 in BXD eye data) | Chr3: 108.267833  | 11.2<br>33 | 65 | 11.1 | Chr8: 85.923280  | -<br>0.06<br>9 |

|                                |               |                              |                              |                                                                                                           |                   |            |    |      |                  |                |
|--------------------------------|---------------|------------------------------|------------------------------|-----------------------------------------------------------------------------------------------------------|-------------------|------------|----|------|------------------|----------------|
| 88<br><input type="checkbox"/> | MA_M2F_0706_R | <a href="#">1451521_x_at</a> | <u><i>Wbscr1</i></u>         | Williams-Beuren syndrome chromosome region 1; distal 3' UTR                                               | Chr5: 134.620018  | 11.8<br>37 | 65 | 10.6 | Chr11: 36.172994 | 0.06<br>8      |
| 89<br><input type="checkbox"/> | MA_M2F_0706_R | <a href="#">1450159_at</a>   | <u><i>Rem1</i></u>           | rad and gem related GTP binding protein 1                                                                 | Chr2: 152.634893  | 6.89<br>1  | 65 | 15.6 | Chr2: 107.153805 | 0.06<br>7      |
| 90<br><input type="checkbox"/> | MA_M2F_0706_R | <a href="#">1416058_s_at</a> | <u><i>Atp5c1</i></u>         | ATP synthase, H+ transporting, mitochondrial F1 complex, gamma polypeptide 1; last two exons              | Chr2: 10.059028   | 15.5<br>95 | 65 | 6.9  | Chr2: 176.000000 | 0.06<br>9      |
| 91<br><input type="checkbox"/> | MA_M2F_0706_R | <a href="#">1433535_x_at</a> | <u><i>Cct2</i></u>           | chaperonin subunit 2 (beta)                                                                               | Chr10: 103.893749 | 12.7<br>56 | 65 | 16.1 | Chr16: 63.773114 | -<br>0.10<br>7 |
| 92<br><input type="checkbox"/> | MA_M2F_0706_R | <a href="#">1417652_a_at</a> | <u><i>Tbca</i></u>           | tubulin cofactor a; exon 3 and last intron                                                                | Chr13: 94.837108  | 12.9<br>76 | 65 | 9.8  | Chr15: 91.405127 | 0.11<br>6      |
| 93<br><input type="checkbox"/> | MA_M2F_0706_R | <a href="#">1416163_at</a>   | <u><i>Cops4</i></u>          | COP9 (constitutive photomorphogenic) homolog, subunit 4; last two exons and proximal 3' UTR               | Chr5: 100.543853  | 10.1<br>57 | 65 | 10.6 | Chr14: 19.755208 | 0.10<br>4      |
| 94<br><input type="checkbox"/> | MA_M2F_0706_R | <a href="#">1416859_at</a>   | <u><i>Fkbp3</i></u>          | FK506 binding protein 3; last four exons                                                                  | Chr12: 65.063678  | 10.7<br>87 | 65 | 16.2 | Chr3: 134.523036 | -<br>0.12<br>2 |
| 95<br><input type="checkbox"/> | MA_M2F_0706_R | <a href="#">1417573_at</a>   | <u><i>Mmadhc</i></u>         | methylmalonic aciduria (cobalamin deficiency) cblD type, with homocystinuria; last two exons and 3' UTR   | Chr2: 50.279951   | 11.6<br>70 | 65 | 10.5 | Chr3: 134.523036 | -<br>0.09<br>7 |
| 96<br><input type="checkbox"/> | MA_M2F_0706_R | <a href="#">1416668_at</a>   | <u><i>Ttc35</i></u>          | tetratricopeptide repeat domain 35 (nonmembrane-spanning 40 kD O-linked glycosyltransferase); three exons | Chr15: 43.527518  | 11.9<br>51 | 65 | 13.1 | Chr15: 91.405127 | 0.12<br>4      |
| 97<br><input type="checkbox"/> | MA_M2F_0706_R | <a href="#">1457677_at</a>   | <u><i>C920016 K16Rik</i></u> | RIKEN cDNA C920016K16; distal 3' UTR                                                                      | Chr17: 33.004869  | 8.03<br>8  | 65 | 12.4 | Chr1: 191.333382 | -<br>0.06<br>1 |

|                                 |               |                              |                        |                                                                                                |                  |        |    |      |                  |        |
|---------------------------------|---------------|------------------------------|------------------------|------------------------------------------------------------------------------------------------|------------------|--------|----|------|------------------|--------|
| 98<br><input type="checkbox"/>  | MA_M2F_0706_R | <a href="#">1453731_a_at</a> | <u><i>Tmem77</i></u>   | RIKEN cDNA 2610318G18; last two exons and proximal 3' UTR                                      | Chr3: 106.573608 | 12.404 | 65 | 11.3 | Chr9: 3.400000   | -0.094 |
| 99<br><input type="checkbox"/>  | MA_M2F_0706_R | <a href="#">1436215_at</a>   | <u><i>Ipmk</i></u>     | inositol polyphosphate multikinase; distal 3' UTR                                              | Chr10: 71.385472 | 10.813 | 65 | 13.8 | Chr15: 91.405127 | 0.140  |
| 100<br><input type="checkbox"/> | MA_M2F_0706_R | <a href="#">1423459_at</a>   | <u><i>Cops2</i></u>    | COP9 (constitutive photomorphogenic) homolog, subunit 2; last exon and proximal 3' UTR         | Chr2: 125.832025 | 10.439 | 65 | 13.5 | Chr1: 76.451132  | 0.118  |
| 101<br><input type="checkbox"/> | MA_M2F_0706_R | <a href="#">1418817_at</a>   | <u><i>Chmp1b</i></u>   | chromatin modifying protein 1B                                                                 | Chr18: 67.207239 | 10.045 | 65 | 14.9 | Chr14: 27.000000 | 0.205  |
| 102<br><input type="checkbox"/> | MA_M2F_0706_R | <a href="#">1419984_s_at</a> | <u><i>Zfp644</i></u>   | zinc finger protein 644; mid to distal 3' UTR                                                  | Chr5: 106.617110 | 9.828  | 65 | 12.3 | Chr11: 83.064807 | 0.111  |
| 103<br><input type="checkbox"/> | MA_M2F_0706_R | <a href="#">1416653_at</a>   | <u><i>Stxbp3a</i></u>  | syntaxin binding protein 3a; proximal 3' UTR                                                   | Chr3: 108.793540 | 9.536  | 65 | 8.2  | Chr8: 80.868085  | -0.089 |
| 104<br><input type="checkbox"/> | MA_M2F_0706_R | <a href="#">1452785_at</a>   | <u><i>C18orf55</i></u> | human chromosome 18 open reading frame 55; last exons and 3' UTR (test Mendelian 10.86 in BXD) | Chr18: 84.947626 | 9.571  | 65 | 14.0 | Chr14: 3.000000  | 0.132  |
| 105<br><input type="checkbox"/> | MA_M2F_0706_R | <a href="#">1424642_at</a>   | <u><i>Thoc1</i></u>    | THO complex 1                                                                                  | Chr18: 9.992178  | 9.675  | 65 | 14.7 | Chr2: 181.014276 | 0.121  |
| 106<br><input type="checkbox"/> | MA_M2F_0706_R | <a href="#">1452676_a_at</a> | <u><i>Pnpt1</i></u>    | polyribonucleotide nucleotidyltransferase 1; last four exons including proximal 3' UTR         | Chr11: 29.159348 | 9.388  | 65 | 15.7 | Chr11: 24.905498 | -0.186 |
| 107<br><input type="checkbox"/> | MA_M2F_0706_R | <a href="#">1417122_at</a>   | <u><i>Vav3</i></u>     | vav 3 oncogene (Rho family guanine nucleotide exchange factor); mid distal 3' UTR              | Chr3: 109.685110 | 8.002  | 65 | 9.6  | Chr7: 84.149847  | 0.156  |
| 108<br><input type="checkbox"/> | MA_M2F_0706_R | <a href="#">1435127_a_at</a> | <u><i>Osgepl1</i></u>  | O-sialoglycoprotein endopeptidase-like 1                                                       | Chr1: 53.320085  | 9.391  | 65 | 10.8 | Chr16: 3.500000  | -0.115 |

|                                 |               |                              |                      |                                                                                                                            |                  |        |    |      |                  |        |
|---------------------------------|---------------|------------------------------|----------------------|----------------------------------------------------------------------------------------------------------------------------|------------------|--------|----|------|------------------|--------|
| 109<br><input type="checkbox"/> | MA_M2F_0706_R | <a href="#">1421022_x_at</a> | <i>Acyp1</i>         | acylphosphatase 1, erythrocyte (common) type                                                                               | Chr12: 85.272453 | 10.369 | 65 | 12.6 | Chr4: 96.896949  | 0.180  |
| 110<br><input type="checkbox"/> | MA_M2F_0706_R | <a href="#">1426473_at</a>   | <i>Dnaic9</i>        | DnaJ (Hsp40) homolog, subfamily C, member 9                                                                                | Chr14: 20.385026 | 8.961  | 65 | 10.9 | Chr15: 68.818097 | -0.094 |
| 111<br><input type="checkbox"/> | MA_M2F_0706_R | <a href="#">1424324_at</a>   | <i>A930014I12Rik</i> | RIKEN cDNA A930014I12 gene                                                                                                 | Chr18: 10.566702 | 9.520  | 65 | 17.3 | Chr11: 83.064807 | 0.187  |
| 112<br><input type="checkbox"/> | MA_M2F_0706_R | <a href="#">1448896_at</a>   | <i>Pigf</i>          | phosphatidylinositol glycan, class F                                                                                       | Chr17: 86.997281 | 9.622  | 65 | 13.3 | Chr11: 83.064807 | 0.156  |
| 113<br><input type="checkbox"/> | MA_M2F_0706_R | <a href="#">1448555_at</a>   | <i>D15Ertd682e</i>   | DNA segment, Chr 15, ERATO Doi 682, expressed                                                                              | Chr15: 97.678396 | 8.509  | 65 | 12.8 | Chr14: 9.528965  | 0.122  |
| 114<br><input type="checkbox"/> | MA_M2F_0706_R | <a href="#">1460258_at</a>   | <i>Lect1</i>         | leukocyte cell derived chemotaxin 1                                                                                        | Chr14: 79.637747 | 6.847  | 65 | 14.1 | Chr16: 3.500000  | 0.090  |
| 115<br><input type="checkbox"/> | MA_M2F_0706_R | <a href="#">1421202_at</a>   | <i>Chrna4</i>        | cholinergic receptor, nicotinic, alpha 4 (high affinity nicotine receptor with Chrbn2); last two exons and proximal 3' UTR | Chr2: 181.024702 | 8.688  | 65 | 10.9 | Chr13: 3.150000  | -0.100 |
| 116<br><input type="checkbox"/> | MA_M2F_0706_R | <a href="#">1417140_a_at</a> | <i>Ptpn2</i>         | protein tyrosine phosphatase, non-receptor type 2; last exon and 3' UTR                                                    | Chr18: 67.665655 | 8.719  | 65 | 14.9 | Chr14: 9.528965  | 0.147  |
| 117<br><input type="checkbox"/> | MA_M2F_0706_R | <a href="#">1424230_at</a>   | <i>Exoc6</i>         | exocyst complex component 6                                                                                                | Chr19: 37.682952 | 8.747  | 65 | 13.8 | ChrX: 61.058643  | -0.143 |
| 118<br><input type="checkbox"/> | MA_M2F_0706_R | <a href="#">1434404_at</a>   | <i>Fam73a</i>        | family with sequence similarity 73, member A                                                                               | Chr3: 152.274018 | 7.884  | 65 | 13.8 | Chr14: 3.000000  | 0.145  |
| 119<br><input type="checkbox"/> | MA_M2F_0706_R | <a href="#">1427197_at</a>   | <i>Atr</i>           | ataxia telangiectasia and rad3 related; last four coding exons                                                             | Chr9: 95.945370  | 7.738  | 65 | 12.3 | Chr3: 39.650830  | -0.160 |
| 120<br><input type="checkbox"/> | MA_M2F_0706_R | <a href="#">1435682_at</a>   | <i>Lars2</i>         | leucyl-tRNA synthetase, mitochondrial; distal 3' UTR (test Mendelian                                                       | Chr9: 123.462289 | 9.884  | 65 | 11.9 | Chr14: 3.000000  | 0.093  |

|                                 |               |                              |                             |                                                                                   |                  |            |    |      |                   |                |
|---------------------------------|---------------|------------------------------|-----------------------------|-----------------------------------------------------------------------------------|------------------|------------|----|------|-------------------|----------------|
|                                 |               |                              |                             | 1.04, apparent transQTL)                                                          |                  |            |    |      |                   |                |
| 121<br><input type="checkbox"/> | MA_M2F_0706_R | <a href="#">1426269_at</a>   | <u><i>Sybl1</i></u>         | synaptobrevin like 1 (pseudoautosomal region); distal 3' UTR                      | ChrX: 1.000000   | 10.8<br>34 | 65 | 9.4  | Chr16: 3.500000   | -<br>0.15<br>2 |
| 122<br><input type="checkbox"/> | MA_M2F_0706_R | <a href="#">1415981_at</a>   | <u><i>Herpud2</i></u>       | HERPUD family member 2; 3' UTR                                                    | Chr9: 25.108158  | 10.2<br>15 | 65 | 10.7 | Chr11: 83.064807  | 0.15<br>6      |
| 123<br><input type="checkbox"/> | MA_M2F_0706_R | <a href="#">1419641_at</a>   | <u><i>Purb</i></u>          | purine rich element binding protein B                                             | Chr11: 6.473439  | 9.15<br>2  | 65 | 16.5 | Chr14: 3.000000   | 0.19<br>1      |
| 124<br><input type="checkbox"/> | MA_M2F_0706_R | <a href="#">1452138_a_at</a> | <u><i>Ace2</i></u>          | angiotensin I converting enzyme (peptidyl-dipeptidase A) 2; last 2~6 and 11 exons | ChrX: 164.167855 | 10.0<br>33 | 65 | 12.1 | Chr14: 3.000000   | 0.15<br>6      |
| 125<br><input type="checkbox"/> | MA_M2F_0706_R | <a href="#">1419065_at</a>   | <u><i>5730521E12Rik</i></u> | RIKEN cDNA 5730521E12 gene                                                        | Chr10: 52.404060 | 8.44<br>2  | 65 | 10.1 | Chr14: 48.527624  | 0.22<br>4      |
| 126<br><input type="checkbox"/> | MA_M2F_0706_R | <a href="#">1428551_at</a>   | <u><i>Trmt11</i></u>        | tRNA methyltransferase 11 homolog; last 2 exons and 3' UTR                        | Chr10: 30.534740 | 7.83<br>3  | 65 | 12.8 | Chr11: 83.064807  | 0.11<br>6      |
| 127<br><input type="checkbox"/> | MA_M2F_0706_R | <a href="#">1434607_at</a>   | <u><i>Ddx52</i></u>         | DEAD (Asp-Glu-Ala-Asp) box polypeptide 52                                         | Chr11: 83.959487 | 7.08<br>3  | 65 | 13.2 | Chr14: 9.528965   | 0.18<br>7      |
| 128<br><input type="checkbox"/> | MA_M2F_0706_R | <a href="#">1452385_at</a>   | <u><i>Usp53</i></u>         | ubiquitin specific protease 53                                                    | Chr3: 122.931918 | 6.64<br>7  | 65 | 13.8 | Chr14: 114.751225 | 0.17<br>5      |
| 129<br><input type="checkbox"/> | MA_M2F_0706_R | <a href="#">1439334_at</a>   | <u><i>A330009G12</i></u>    | ESTs                                                                              | ChrX: 141.727603 | 5.53<br>3  | 65 | 10.8 | Chr14: 9.528965   | 0.03<br>6      |
| 130<br><input type="checkbox"/> | MA_M2F_0706_R | <a href="#">1448922_at</a>   | <u><i>Dusp19</i></u>        | dual specificity phosphatase 19                                                   | Chr2: 80.621210  | 7.16<br>2  | 65 | 15.1 | Chr14: 24.000000  | 0.15<br>3      |
| 131<br><input type="checkbox"/> | MA_M2F_0706_R | <a href="#">1448703_at</a>   | <u><i>Lsm8</i></u>          | LSM8 homolog, U6 small nuclear RNA associated (S. cerevisiae)                     | Chr6: 18.851648  | 9.28<br>7  | 65 | 12.2 | Chr9: 29.940961   | -<br>0.17<br>0 |
| 132<br><input type="checkbox"/> | MA_M2F_0706_R | <a href="#">1452090_a_at</a> | <u><i>Olfm3</i></u>         | olfactomedin 3; distal 3' UTR                                                     | Chr3: 115.124528 | 7.78<br>3  | 65 | 11.2 | Chr14: 30.957748  | 0.23<br>4      |

|                                 |               |                              |                      |                                                                                                                                |                  |       |    |      |                  |        |
|---------------------------------|---------------|------------------------------|----------------------|--------------------------------------------------------------------------------------------------------------------------------|------------------|-------|----|------|------------------|--------|
| 133<br><input type="checkbox"/> | MA_M2F_0706_R | <a href="#">1451968_at</a>   | <i>Xrcc5</i>         | X-ray repair complementing defective repair in Chinese hamster cells 5; last five exons                                        | Chr1: 72.381622  | 9.455 | 65 | 11.2 | Chr8: 25.520489  | -0.096 |
| 134<br><input type="checkbox"/> | MA_M2F_0706_R | <a href="#">1452239_at</a>   | <i>Gt(ROSA)26Sor</i> | gene trap ROSA 26, Philippe Soriano (between Thumpd3 and Setd5); putative 3' end exon or 3' UTR, expressed even in normal mice | Chr6: 113.070606 | 7.082 | 65 | 13.9 | Chr11: 83.064807 | 0.193  |
| 135<br><input type="checkbox"/> | MA_M2F_0706_R | <a href="#">1460430_at</a>   | <i>Rap2c</i>         | RAP2C, member of RAS oncogene family                                                                                           | ChrX: 51.004526  | 8.210 | 65 | 13.6 | Chr14: 3.000000  | 0.183  |
| 136<br><input type="checkbox"/> | MA_M2F_0706_R | <a href="#">1428829_at</a>   | <i>Dennd1b</i>       | DENN/MADD domain containing 1B; putative far 3' UTR                                                                            | Chr1: 139.175456 | 9.165 | 65 | 13.4 | Chr14: 9.528965  | 0.186  |
| 137<br><input type="checkbox"/> | MA_M2F_0706_R | <a href="#">1417506_at</a>   | <i>Gmnn</i>          | geminin (cell cycle regulatory, replication inhibition); last three exons and proximal 3' UTR                                  | Chr13: 24.751994 | 8.534 | 65 | 9.2  | Chr4: 156.121747 | 0.093  |
| 138<br><input type="checkbox"/> | MA_M2F_0706_R | <a href="#">1434682_at</a>   | <i>Zfp770</i>        | zinc finger protein 770; distal 3' UTR                                                                                         | Chr2: 114.193761 | 7.485 | 65 | 16.6 | Chr11: 83.064807 | 0.106  |
| 139<br><input type="checkbox"/> | MA_M2F_0706_R | <a href="#">1425495_at</a>   | <i>Zfp62</i>         | zinc finger protein 62                                                                                                         | Chr11: 49.218192 | 6.712 | 65 | 18.6 | Chr14: 3.000000  | 0.193  |
| 140<br><input type="checkbox"/> | MA_M2F_0706_R | <a href="#">1428629_at</a>   | <i>6330417C12Rik</i> | RIKEN cDNA 6330417C12 gene                                                                                                     | Chr19: 40.917374 | 7.183 | 65 | 10.0 | Chr8: 80.868085  | -0.150 |
| 141<br><input type="checkbox"/> | MA_M2F_0706_R | <a href="#">1435828_at</a>   | <i>Maf</i>           | musculoaponeurotic fibrosarcoma (v-maf) AS42 transcription factor proto-oncogene; distal 3' UTR                                | Chr8: 115.683054 | 8.048 | 65 | 9.9  | Chr14: 19.755208 | 0.155  |
| 142<br><input type="checkbox"/> | MA_M2F_0706_R | <a href="#">1439266_a_at</a> | <i>Polr3k</i>        | polymerase (RNA) III (DNA directed) polypeptide K                                                                              | Chr2: 181.868495 | 7.426 | 65 | 16.2 | Chr14: 19.755208 | 0.207  |
| 143<br><input type="checkbox"/> | MA_M2F_0706_R | <a href="#">1440742_at</a>   | <i>LOC239447</i>     | ESTs                                                                                                                           | Chr18: 6.491461  | 6.615 | 65 | 14.6 | Chr14: 19.755208 | 0.103  |

|                                 |               |                              |                             |                                                                          |                  |        |    |      |                   |        |
|---------------------------------|---------------|------------------------------|-----------------------------|--------------------------------------------------------------------------|------------------|--------|----|------|-------------------|--------|
| 144<br><input type="checkbox"/> | MA_M2F_0706_R | <a href="#">1433750_at</a>   | <u><i>Slc31a1</i></u>       | solute carrier family 31, member 1; distal 3' UTR                        | Chr4: 62.391176  | 10.141 | 65 | 13.9 | Chr11: 22.916002  | -0.166 |
| 145<br><input type="checkbox"/> | MA_M2F_0706_R | <a href="#">1422302_s_at</a> | <u><i>Ftl1</i></u>          | ferritin light polypeptide 1; exons 2 and 4 (of 4)                       | Chr7: 45.458120  | 15.955 | 65 | 18.0 | Chr14: 55.622689  | -0.150 |
| 146<br><input type="checkbox"/> | MA_M2F_0706_R | <a href="#">1452972_at</a>   | <u><i>1700013G20Rik</i></u> | RIKEN cDNA 1700013G20 gene                                               | Chr12: 9.034923  | 9.434  | 65 | 10.8 | Chr17: 10.720847  | -0.128 |
| 147<br><input type="checkbox"/> | MA_M2F_0706_R | <a href="#">1452093_at</a>   | <u><i>Tmem185b</i></u>      | transmembrane protein 185B; 3' UTR                                       | Chr1: 119.527628 | 9.697  | 65 | 15.1 | Chr14: 3.000000   | 0.125  |
| 148<br><input type="checkbox"/> | MA_M2F_0706_R | <a href="#">1448979_at</a>   | <u><i>Muted</i></u>         | muted                                                                    | Chr13: 38.602741 | 9.480  | 65 | 15.7 | Chr14: 9.528965   | 0.142  |
| 149<br><input type="checkbox"/> | MA_M2F_0706_R | <a href="#">1434563_at</a>   | <u><i>Rps6kc1</i></u>       | ribosomal protein S6 kinase polypeptide 1; mid-proximal 3' UTR or intron | Chr1: 190.773292 | 7.684  | 65 | 13.5 | Chr14: 19.755208  | -0.106 |
| 150<br><input type="checkbox"/> | MA_M2F_0706_R | <a href="#">1448712_at</a>   | <u><i>Chm</i></u>           | choroideremia; mid 3'UTR                                                 | ChrX: 113.041468 | 8.544  | 65 | 14.2 | Chr14: 9.528965   | 0.175  |
| 151<br><input type="checkbox"/> | MA_M2F_0706_R | <a href="#">1456038_at</a>   | <u><i>Fbxl4</i></u>         | F-box and leucine-rich repeat protein 4; 2 exons and proximal 3'UTR      | Chr4: 22.427368  | 8.935  | 65 | 11.1 | Chr14: 9.528965   | 0.160  |
| 152<br><input type="checkbox"/> | MA_M2F_0706_R | <a href="#">1448540_a_at</a> | <u><i>0610012G03Rik</i></u> | RIKEN cDNA 0610012G03 gene                                               | Chr16: 31.947861 | 10.690 | 65 | 12.3 | ChrX: 70.094108   | -0.124 |
| 153<br><input type="checkbox"/> | MA_M2F_0706_R | <a href="#">1428652_at</a>   | <u><i>0610010F05Rik</i></u> | RIKEN cDNA 0610010F05; distal 3' UTR                                     | Chr11: 23.573924 | 8.242  | 65 | 14.3 | Chr14: 9.528965   | 0.189  |
| 154<br><input type="checkbox"/> | MA_M2F_0706_R | <a href="#">1434750_at</a>   | <u><i>Exoc3</i></u>         | exocyst complex component 3; last four exons and proximal 3' UTR         | Chr13: 74.172009 | 9.699  | 65 | 11.4 | Chr8: 94.374289   | -0.115 |
| 155<br><input type="checkbox"/> | MA_M2F_0706_R | <a href="#">1429351_at</a>   | <u><i>Klhl24</i></u>        | kelch-like 24; mid 3' UTR                                                | Chr16: 20.124883 | 10.148 | 65 | 9.3  | Chr13: 115.551768 | -0.190 |



|                                 |               |                              |                        |                                                                                                                                                          |                  |        |    |      |                  |        |
|---------------------------------|---------------|------------------------------|------------------------|----------------------------------------------------------------------------------------------------------------------------------------------------------|------------------|--------|----|------|------------------|--------|
| 156<br><input type="checkbox"/> | MA_M2F_0706_R | <a href="#">1435529_at</a>   | <u><i>Ifit1</i></u>    | interferon-induced protein with tetratricopeptide repeats 1 related sequence, OTTMUSG0000001664 4; 3' UTR of Ifit1-related sequence (from 2010002M12Rik) | Chr19: 34.593014 | 7.121  | 65 | 16.6 | Chr14: 19.755208 | 0.150  |
| 157<br><input type="checkbox"/> | MA_M2F_0706_R | <a href="#">1418579_at</a>   | <u><i>Cetn2</i></u>    | centrin 2                                                                                                                                                | ChrX: 72.913915  | 9.910  | 65 | 17.8 | ChrX: 71.441039  | -0.236 |
| 158<br><input type="checkbox"/> | MA_M2F_0706_R | <a href="#">1434099_at</a>   | <u><i>Ppargc1a</i></u> | peroxisome proliferative activated receptor, gamma, coactivator 1 alpha; far 3' UTR                                                                      | Chr5: 51.454320  | 9.157  | 65 | 11.1 | Chr1: 191.601182 | -0.140 |
| 159<br><input type="checkbox"/> | MA_M2F_0706_R | <a href="#">1429108_at</a>   | <u><i>Msl2l1</i></u>   | male-specific lethal 2-like 1; 3' UTR                                                                                                                    | Chr13: 66.774460 | 7.431  | 65 | 15.8 | Chr14: 30.957748 | 0.145  |
| 160<br><input type="checkbox"/> | MA_M2F_0706_R | <a href="#">1435893_at</a>   | <u><i>Vldlr</i></u>    | very low density lipoprotein receptor; putative far 3' UTR                                                                                               | Chr19: 27.253653 | 9.829  | 65 | 15.9 | Chr11: 83.064807 | 0.183  |
| 161<br><input type="checkbox"/> | MA_M2F_0706_R | <a href="#">1456744_x_at</a> | <u><i>Flcn</i></u>     | folliculin; distal 3'UTR                                                                                                                                 | Chr11: 59.791771 | 5.895  | 65 | 12.4 | Chr11: 83.064807 | 0.059  |
| 162<br><input type="checkbox"/> | MA_M2F_0706_R | <a href="#">1434561_at</a>   | <u><i>Asx1l</i></u>    | additional sex combs like 1; distal 3' UTR                                                                                                               | Chr2: 153.403453 | 9.136  | 65 | 11.0 | Chr14: 24.000000 | 0.133  |
| 163<br><input type="checkbox"/> | MA_M2F_0706_R | <a href="#">1417438_at</a>   | <u><i>Rdh14</i></u>    | retinol dehydrogenase 14 (all-trans and 9-cis)                                                                                                           | Chr12: 10.395066 | 10.554 | 65 | 9.9  | ChrX: 64.161107  | -0.119 |
| 164<br><input type="checkbox"/> | MA_M2F_0706_R | <a href="#">1434719_at</a>   | <u><i>A2m</i></u>      | alpha-2-macroglobulin; last 7 exons except last exon                                                                                                     | Chr6: 121.674940 | 6.859  | 65 | 7.9  | Chr14: 19.755208 | -0.077 |
| 165<br><input type="checkbox"/> | MA_M2F_0706_R | <a href="#">1460182_at</a>   | <u><i>Snx4</i></u>     | sorting nexin 4; mid to distal 3'UTR                                                                                                                     | Chr16: 33.298991 | 9.587  | 65 | 16.0 | Chr14: 9.528965  | 0.151  |
| 166<br><input type="checkbox"/> | MA_M2F_0706_R | <a href="#">1417077_at</a>   | <u><i>Bcap29</i></u>   | B-cell receptor-associated protein 29; mid 3' UTR                                                                                                        | Chr12: 31.595531 | 8.748  | 65 | 9.4  | Chr10: 55.515150 | -0.222 |

|                                 |               |                              |                             |                                                                                                                                                |                  |            |    |      |                  |            |
|---------------------------------|---------------|------------------------------|-----------------------------|------------------------------------------------------------------------------------------------------------------------------------------------|------------------|------------|----|------|------------------|------------|
| 167<br><input type="checkbox"/> | MA_M2F_0706_R | <a href="#">1418066_at</a>   | <u><i>Cfl2</i></u>          | cofilin 2, muscle; distal 3' UTR                                                                                                               | Chr12: 54.858855 | 9.19<br>2  | 65 | 17.8 | ChrX: 47.876769  | -<br>0.199 |
| 168<br><input type="checkbox"/> | MA_M2F_0706_R | <a href="#">1450987_a_at</a> | <u><i>2310004I24Rik</i></u> | RIKEN cDNA 2310004I24 gene                                                                                                                     | Chr11: 67.038167 | 9.11<br>3  | 65 | 12.8 | Chr14: 27.000000 | 0.119      |
| 169<br><input type="checkbox"/> | MA_M2F_0706_R | <a href="#">1417704_a_at</a> | <u><i>Arhgap6</i></u>       | Rho GTPase activating protein 6                                                                                                                | ChrX: 169.303893 | 6.31<br>1  | 65 | 11.3 | Chr8: 94.374289  | -<br>0.070 |
| 170<br><input type="checkbox"/> | MA_M2F_0706_R | <a href="#">1450950_at</a>   | <u><i>Cspg6</i></u>         | structural maintenance of chromosomes 3 (CNS age-associated); exons 26 and 27 and proximal 3' UTR (transQTL on Chr 12 in BXD hippocampus data) | Chr19: 53.641939 | 10.7<br>06 | 65 | 9.9  | Chr11: 18.283704 | -<br>0.096 |
| 171<br><input type="checkbox"/> | MA_M2F_0706_R | <a href="#">1459712_at</a>   | <u><i>Zfp182</i></u>        | zinc finger protein 182                                                                                                                        | ChrX: 21.026222  | 5.70<br>3  | 65 | 11.3 | Chr14: 3.000000  | 0.048      |
| 172<br><input type="checkbox"/> | MA_M2F_0706_R | <a href="#">1418651_at</a>   | <u><i>Spata6</i></u>        | spermatogenesis associated 6                                                                                                                   | Chr4: 111.828580 | 8.41<br>1  | 65 | 10.5 | Chr16: 3.500000  | -<br>0.097 |
| 173<br><input type="checkbox"/> | MA_M2F_0706_R | <a href="#">1446471_at</a>   | <u><i>B130066H01Rik</i></u> | 15 days embryo head cDNA, RIKEN full-length enriched library, clone:D930045O10 product:unknown EST, full insert sequence.                      | Chr7: 129.649450 | 7.06<br>1  | 65 | 23.2 | Chr14: 9.528965  | -<br>0.068 |
| 174<br><input type="checkbox"/> | MA_M2F_0706_R | <a href="#">1417319_at</a>   | <u><i>Pvrl3</i></u>         | poliovirus receptor-related 3                                                                                                                  | Chr16: 46.447261 | 8.25<br>4  | 65 | 14.6 | Chr14: 24.000000 | 0.192      |
| 175<br><input type="checkbox"/> | MA_M2F_0706_R | <a href="#">1449341_a_at</a> | <u><i>Stom</i></u>          | stomatin                                                                                                                                       | Chr2: 35.315873  | 9.34<br>2  | 65 | 8.7  | Chr11: 24.905498 | 0.111      |
| 176<br><input type="checkbox"/> | MA_M2F_0706_R | <a href="#">1419462_s_at</a> | <u><i>Gt13</i></u>          | gene trap locus 3                                                                                                                              | Chr8: 95.420551  | 8.74<br>6  | 65 | 14.9 | Chr8: 94.374289  | -<br>0.212 |
| 177<br><input type="checkbox"/> | MA_M2F_0706_R | <a href="#">1421888_x_at</a> | <u><i>Ap1p2</i></u>         | amyloid beta (A4) precursor-like protein 2; distal 3' UTR                                                                                      | Chr9: 31.149603  | 10.6<br>59 | 65 | 10.2 | Chr3: 39.650830  | 0.074      |

|                                 |               |                              |                              |                                                                                                                                                            |                   |        |    |      |                   |        |
|---------------------------------|---------------|------------------------------|------------------------------|------------------------------------------------------------------------------------------------------------------------------------------------------------|-------------------|--------|----|------|-------------------|--------|
| 178<br><input type="checkbox"/> | MA_M2F_0706_R | <a href="#">1427114_at</a>   | <u><i>Ttc19</i></u>          | tetratricopeptide repeat domain 19 (mitochondrial)                                                                                                         | Chr11: 62.314658  | 7.098  | 65 | 15.2 | Chr14: 9.528965   | 0.155  |
| 179<br><input type="checkbox"/> | MA_M2F_0706_R | <a href="#">1418640_at</a>   | <u><i>Sirt1</i></u>          | sirtuin 1, NAD+ dependent histone deacetylase, class 1 (longevity, caloric restriction associated, mitochondrial biogenesis, cell survival); distal 3' UTR | Chr10: 63.319162  | 8.837  | 65 | 12.8 | Chr14: 3.000000   | 0.227  |
| 180<br><input type="checkbox"/> | MA_M2F_0706_R | <a href="#">1418048_at</a>   | <u><i>1110059 G10Rik</i></u> | RIKEN cDNA 1110059G10 gene                                                                                                                                 | Chr9: 122.947701  | 10.525 | 65 | 16.5 | Chr11: 83.064807  | 0.152  |
| 181<br><input type="checkbox"/> | MA_M2F_0706_R | <a href="#">1428415_at</a>   | <u><i>2310020 H19Rik</i></u> | RIKEN cDNA 2310020H19 gene                                                                                                                                 | Chr12: 84.418169  | 7.440  | 65 | 15.2 | Chr12: 51.647704  | 0.121  |
| 182<br><input type="checkbox"/> | MA_M2F_0706_R | <a href="#">1425979_a_at</a> | <u><i>Fbf1</i></u>           | Fas (TNFRSF6) binding factor 1                                                                                                                             | Chr11: 116.142298 | 10.206 | 65 | 15.2 | Chr14: 115.744394 | -0.122 |
| 183<br><input type="checkbox"/> | MA_M2F_0706_R | <a href="#">1454947_a_at</a> | <u><i>Ub1cp1</i></u>         | ubiquitin-like domain containing CTD phosphatase 1; distal 3' UTR                                                                                          | Chr11: 44.454597  | 10.071 | 65 | 10.3 | Chr1: 95.094462   | 0.141  |
| 184<br><input type="checkbox"/> | MA_M2F_0706_R | <a href="#">1455633_at</a>   | <u><i>Zfp647</i></u>         | zinc finger protein 647; last exon and 3' UTR                                                                                                              | Chr15: 76.910433  | 6.571  | 65 | 12.6 | Chr14: 24.000000  | 0.122  |
| 185<br><input type="checkbox"/> | MA_M2F_0706_R | <a href="#">1449960_at</a>   | <u><i>Nptx2</i></u>          | neuronal pentraxin 2; last exon and 3' UTR                                                                                                                 | Chr5: 144.556182  | 6.458  | 65 | 8.8  | Chr14: 19.755208  | 0.057  |
| 186<br><input type="checkbox"/> | MA_M2F_0706_R | <a href="#">1450418_a_at</a> | <u><i>Yipf4</i></u>          | Yip1 domain family, member 4; 3' UTR                                                                                                                       | Chr17: 74.499383  | 9.199  | 65 | 10.1 | Chr7: 84.149847   | 0.140  |
| 187<br><input type="checkbox"/> | MA_M2F_0706_R | <a href="#">1435116_at</a>   | <u><i>Kiaa1383</i></u>       | KIAA1383, RIKEN cDNA 4933403G14; 3' UTR                                                                                                                    | Chr8: 125.672794  | 6.191  | 65 | 12.1 | Chr14: 9.528965   | 0.088  |
| 188<br><input type="checkbox"/> | MA_M2F_0706_R | <a href="#">1441200_at</a>   | <u><i>Klf3</i></u>           | Kruppel-like factor 3 (basic)                                                                                                                              | Chr5: 64.824218   | 10.853 | 65 | 11.6 | Chr14: 55.622689  | -0.098 |
| 189<br><input type="checkbox"/> | MA_M2F_0706_R | <a href="#">1437511_x_at</a> | <u><i>Mclc</i></u>           | myeloid cell leukemia sequence 1, related sequence 1                                                                                                       | Chr3: 108.678619  | 9.610  | 65 | 14.1 | Chr14: 24.000000  | 0.164  |

|                                 |               |                              |                 |                                                                                          |                   |        |    |      |                  |        |
|---------------------------------|---------------|------------------------------|-----------------|------------------------------------------------------------------------------------------|-------------------|--------|----|------|------------------|--------|
| 190<br><input type="checkbox"/> | MA_M2F_0706_R | <a href="#">1420139_s_at</a> | <i>Krr1</i>     | KRR1, small subunit (SSU) processome component, homolog; mid 3' UTR                      | Chr10: 111.985871 | 9.281  | 65 | 11.7 | Chr14: 24.000000 | 0.190  |
| 191<br><input type="checkbox"/> | MA_M2F_0706_R | <a href="#">1441342_at</a>   | <i>Dpp4</i>     | dipeptidylpeptidase 4                                                                    | Chr2: 62.330153   | 7.859  | 65 | 13.0 | Chr14: 9.528965  | 0.220  |
| 192<br><input type="checkbox"/> | MA_M2F_0706_R | <a href="#">1434960_at</a>   | <i>Taf9b</i>    | TAF9B RNA polymerase II, TATA box binding protein (TBP)-associated factor; distal 3' UTR | ChrX: 106.207073  | 8.542  | 65 | 12.1 | Chr14: 3.000000  | 0.173  |
| 193<br><input type="checkbox"/> | MA_M2F_0706_R | <a href="#">1428775_at</a>   | <i>Kiaa0391</i> | mitochondrial ribonuclease P protein 3                                                   | Chr12: 55.377219  | 8.427  | 65 | 15.8 | Chr12: 46.816738 | 0.109  |
| 194<br><input type="checkbox"/> | MA_M2F_0706_R | <a href="#">1448917_at</a>   | <i>Thrap6</i>   | thyroid hormone receptor associated protein 6; 3 exons and proximal 3'UTR                | Chr15: 52.719396  | 10.231 | 65 | 10.0 | Chr8: 80.868085  | -0.097 |
| 195<br><input type="checkbox"/> | MA_M2F_0706_R | <a href="#">1416794_at</a>   | <i>Atl2</i>     | atlastin GTPase 2 (ADP-ribosylation factor-like 6 interacting protein 2); exon 9         | Chr17: 79.852664  | 8.921  | 65 | 8.8  | Chr15: 72.500609 | -0.153 |
| 196<br><input type="checkbox"/> | MA_M2F_0706_R | <a href="#">1436706_at</a>   | <i>Tmem32</i>   | transmembrane protein 32                                                                 | ChrX: 56.586781   | 8.848  | 65 | 13.5 | Chr14: 3.000000  | 0.199  |
| 197<br><input type="checkbox"/> | MA_M2F_0706_R | <a href="#">1419276_at</a>   | <i>Enpp1</i>    | ectonucleotide pyrophosphatase/phosphodiesterase 1                                       | Chr10: 24.645301  | 9.196  | 65 | 10.5 | Chr2: 134.800968 | 0.170  |
| 198<br><input type="checkbox"/> | MA_M2F_0706_R | <a href="#">1431252_a_at</a> | <i>Zfp655</i>   | zinc finger protein 655                                                                  | Chr5: 145.244666  | 7.540  | 65 | 15.0 | ChrX: 61.058643  | -0.188 |
| 199<br><input type="checkbox"/> | MA_M2F_0706_R | <a href="#">1420959_at</a>   | <i>Asph</i>     | aspartate-beta-hydroxylase; mid-distal 3' UTR                                            | Chr4: 9.451848    | 8.133  | 65 | 12.9 | Chr14: 19.755208 | 0.215  |
| 200<br><input type="checkbox"/> | MA_M2F_0706_R | <a href="#">1416115_at</a>   | <i>Orc3l</i>    | origin recognition complex, subunit 3-like (S. cerevisiae)                               | Chr4: 34.572464   | 9.689  | 65 | 12.2 | Chr2: 134.462008 | 0.117  |
| 201<br><input type="checkbox"/> | MA_M2F_0706_R | <a href="#">1421908_a_at</a> | <i>Tcf12</i>    | transcription factor 12; distal 3' UTR                                                   | Chr9: 71.845794   | 9.714  | 65 | 14.8 | Chr15: 69.108222 | -0.166 |

|                                 |               |                              |                             |                                                                                          |                   |        |    |      |                  |        |
|---------------------------------|---------------|------------------------------|-----------------------------|------------------------------------------------------------------------------------------|-------------------|--------|----|------|------------------|--------|
| 202<br><input type="checkbox"/> | MA_M2F_0706_R | <a href="#">1417442_a_at</a> | <u><i>Pex3</i></u>          | peroxisomal biogenesis factor 3                                                          | Chr10: 13.532375  | 9.350  | 65 | 11.7 | Chr13: 25.000000 | 0.144  |
| 203<br><input type="checkbox"/> | MA_M2F_0706_R | <a href="#">1420850_at</a>   | <u><i>Crnkl1</i></u>        | Crn, crooked neck-like 1 (Drosophila)                                                    | Chr2: 145.920593  | 7.867  | 65 | 11.9 | Chr15: 68.818097 | -0.109 |
| 204<br><input type="checkbox"/> | MA_M2F_0706_R | <a href="#">1427831_s_at</a> | <u><i>Zfp260</i></u>        | zinc finger protein 260                                                                  | Chr7: 30.105601   | 7.368  | 65 | 13.7 | Chr14: 3.000000  | 0.220  |
| 205<br><input type="checkbox"/> | MA_M2F_0706_R | <a href="#">1418650_at</a>   | <u><i>Spata6</i></u>        | spermatogenesis associated 6                                                             | Chr4: 111.799138  | 8.253  | 65 | 11.8 | Chr10: 64.710346 | -0.088 |
| 206<br><input type="checkbox"/> | MA_M2F_0706_R | <a href="#">1430623_s_at</a> | <u><i>5830411E10Rik</i></u> | RIKEN cDNA 5830411E10 gene                                                               | Chr1: 51.470742   | 9.677  | 65 | 11.6 | Chr10: 67.616312 | -0.160 |
| 207<br><input type="checkbox"/> | MA_M2F_0706_R | <a href="#">1420977_at</a>   | <u><i>Man1a2</i></u>        | mannosidase, alpha, class 1A, member 2                                                   | Chr3: 100.565465  | 8.629  | 65 | 20.6 | Chr14: 9.528965  | 0.208  |
| 208<br><input type="checkbox"/> | MA_M2F_0706_R | <a href="#">1450762_s_at</a> | <u><i>Zfp191</i></u>        | zinc finger protein 191; proximal 3' UTR                                                 | Chr18: 24.013534  | 7.585  | 65 | 8.4  | Chr15: 63.392263 | -0.073 |
| 209<br><input type="checkbox"/> | MA_M2F_0706_R | <a href="#">1421139_a_at</a> | <u><i>Zfp386</i></u>        | zinc finger protein 386 (Krüppel-like); last exon                                        | Chr12: 116.059259 | 7.447  | 65 | 11.5 | Chr14: 3.000000  | 0.198  |
| 210<br><input type="checkbox"/> | MA_M2F_0706_R | <a href="#">1425022_at</a>   | <u><i>Usp3</i></u>          | ubiquitin specific protease 3; last 4 exons and proximal 3' UTR                          | Chr9: 66.518371   | 10.137 | 65 | 8.9  | Chr10: 48.377966 | -0.104 |
| 211<br><input type="checkbox"/> | MA_M2F_0706_R | <a href="#">1415789_a_at</a> | <u><i>LOC665689</i></u>     | similar to ubiquitin-like domain containing CTD phosphatase 1; putative exon (from ESTs) | Chr11: 16.635159  | 9.069  | 65 | 13.2 | Chr11: 42.818374 | 0.286  |
| 212<br><input type="checkbox"/> | MA_M2F_0706_R | <a href="#">1420999_at</a>   | <u><i>Cnot4</i></u>         | CCR4-NOT transcription complex, subunit 4                                                | Chr6: 35.046068   | 8.044  | 65 | 9.0  | Chr2: 134.800968 | 0.132  |
| 213<br><input type="checkbox"/> | MA_M2F_0706_R | <a href="#">1429250_at</a>   | <u><i>Dnchc2</i></u>        | dynein, cytoplasmic, heavy chain 2; last 4 exons (transQTL on Chr 4 in BXD eye data)     | Chr9: 6.929469    | 9.350  | 65 | 10.0 | Chr2: 138.500000 | 0.110  |

|                                 |               |                              |                                               |                                                                                       |                   |        |    |      |                  |        |
|---------------------------------|---------------|------------------------------|-----------------------------------------------|---------------------------------------------------------------------------------------|-------------------|--------|----|------|------------------|--------|
| 214<br><input type="checkbox"/> | MA_M2F_0706_R | <a href="#">1451619_at</a>   | <u><i>Golph3l</i></u>                         | golgi phosphoprotein 3-like; last exon and proximal 3' UTR                            | Chr3: 95.617448   | 8.351  | 65 | 10.4 | ChrX: 84.597186  | -0.174 |
| 215<br><input type="checkbox"/> | MA_M2F_0706_R | <a href="#">1431784_a_at</a> | <u><i>2310066</i></u><br><u><i>N05Rik</i></u> | RIKEN cDNA 2310066I18 gene                                                            | Chr3: 146.512172  | 8.362  | 65 | 12.7 | ChrX: 64.161107  | -0.138 |
| 216<br><input type="checkbox"/> | MA_M2F_0706_R | <a href="#">1421045_at</a>   | <u><i>Mrc2</i></u>                            | mannose receptor, C type 2                                                            | Chr11: 105.350580 | 8.407  | 65 | 12.8 | Chr9: 99.750326  | -0.171 |
| 217<br><input type="checkbox"/> | MA_M2F_0706_R | <a href="#">1421448_at</a>   | <u><i>Garnl1</i></u>                          | GTPase activating RANGAP domain-like 1; exons 32, 33, 34, and 35                      | Chr12: 55.640606  | 8.533  | 65 | 14.9 | ChrX: 73.428893  | -0.235 |
| 218<br><input type="checkbox"/> | MA_M2F_0706_R | <a href="#">1419089_at</a>   | <u><i>Timp3</i></u>                           | tissue inhibitor of metalloproteinase 3                                               | Chr10: 86.347860  | 14.442 | 65 | 15.7 | Chr14: 19.755208 | -0.149 |
| 219<br><input type="checkbox"/> | MA_M2F_0706_R | <a href="#">1451337_at</a>   | <u><i>Psmf1</i></u>                           | proteasome (prosome, macropain) inhibitor subunit 1; last 2 exons and proximal 3' UTR | Chr2: 151.718622  | 9.984  | 65 | 12.3 | Chr10: 67.616312 | -0.123 |
| 220<br><input type="checkbox"/> | MA_M2F_0706_R | <a href="#">1429186_a_at</a> | <u><i>Cdadac1</i></u>                         | cytidine and dCMP deaminase domain containing 1                                       | Chr14: 59.586352  | 8.359  | 65 | 9.5  | Chr2: 134.800968 | 0.152  |
| 221<br><input type="checkbox"/> | MA_M2F_0706_R | <a href="#">1426456_a_at</a> | <u><i>Miz1</i></u>                            | Msx-interacting-zinc finger; exons 8, 9, 10, and 11                                   | Chr18: 77.133220  | 9.302  | 65 | 15.7 | ChrX: 73.876578  | -0.152 |
| 222<br><input type="checkbox"/> | MA_M2F_0706_R | <a href="#">1451317_at</a>   | <u><i>Ythdf2</i></u>                          | YTH domain family 2; last two exons and proximal 3' UTR                               | Chr4: 132.186852  | 9.743  | 65 | 11.8 | Chr15: 69.108222 | -0.183 |
| 223<br><input type="checkbox"/> | MA_M2F_0706_R | <a href="#">1460399_at</a>   | <u><i>BC018601</i></u>                        | cDNA sequence BC018601                                                                | Chr11: 5.529291   | 9.077  | 65 | 11.2 | Chr12: 29.713200 | 0.106  |
| 224<br><input type="checkbox"/> | MA_M2F_0706_R | <a href="#">1456867_x_at</a> | <u><i>Ergic3</i></u>                          | ERGIC and golgi 3; last exon                                                          | Chr2: 156.018075  | 11.707 | 65 | 10.4 | Chr7: 142.462521 | -0.087 |
| 225<br><input type="checkbox"/> | MA_M2F_0706_R | <a href="#">1451730_at</a>   | <u><i>Zfp62</i></u>                           | zinc finger protein 62                                                                | Chr11: 49.217237  | 7.295  | 65 | 11.0 | Chr14: 3.000000  | 0.126  |

|                                 |               |                              |                               |                                                                                               |                  |        |    |      |                  |        |
|---------------------------------|---------------|------------------------------|-------------------------------|-----------------------------------------------------------------------------------------------|------------------|--------|----|------|------------------|--------|
| 226<br><input type="checkbox"/> | MA_M2F_0706_R | <a href="#">1434979_at</a>   | <a href="#">4933403F05Rik</a> | RIKEN cDNA 4933403F05 gene                                                                    | Chr18: 68.267767 | 8.473  | 65 | 16.6 | ChrX: 73.876578  | -0.203 |
| 227<br><input type="checkbox"/> | MA_M2F_0706_R | <a href="#">1419803_s_at</a> | <a href="#">Ccgc12</a>        | coiled-coil domain containing 12; last three exons and proximal 3' UTR                        | Chr9: 110.711126 | 11.139 | 65 | 12.8 | Chr1: 5.641533   | 0.080  |
| 228<br><input type="checkbox"/> | MA_M2F_0706_R | <a href="#">1418968_at</a>   | <a href="#">Rb1cc1</a>        | RB1-inducible coiled-coil 1; mid 3'UTR                                                        | Chr1: 6.274578   | 10.245 | 65 | 10.1 | Chr10: 53.743148 | -0.097 |
| 229<br><input type="checkbox"/> | MA_M2F_0706_R | <a href="#">1428845_at</a>   | <a href="#">Bclaf1</a>        | BCL2-associated transcription factor 1; distal 3' UTR (transQTL on Chr 4 in BXD eye data)     | Chr10: 20.341571 | 10.077 | 65 | 9.7  | Chr16: 3.500000  | -0.152 |
| 230<br><input type="checkbox"/> | MA_M2F_0706_R | <a href="#">1448127_at</a>   | <a href="#">Rrm1</a>          | ribonucleotide reductase M1; distal 3' UTR                                                    | Chr7: 102.459425 | 8.437  | 65 | 11.4 | Chr2: 136.127470 | 0.158  |
| 231<br><input type="checkbox"/> | MA_M2F_0706_R | <a href="#">1453282_at</a>   | <a href="#">Cxadr</a>         | coxsackievirus and adenovirus receptor                                                        | Chr16: 78.339777 | 8.041  | 65 | 13.1 | Chr14: 19.755208 | 0.144  |
| 232<br><input type="checkbox"/> | MA_M2F_0706_R | <a href="#">1426842_at</a>   | <a href="#">Ythdf3</a>        | YTH domain family 3; proximal and mid 3' UTR                                                  | Chr3: 16.214439  | 10.305 | 65 | 10.2 | Chr14: 3.000000  | 0.176  |
| 233<br><input type="checkbox"/> | MA_M2F_0706_R | <a href="#">1423961_at</a>   | <a href="#">Wdr26</a>         | WD repeat domain 26 (putative Mtv7, Mls1); putative far 3' UTR                                | Chr1: 181.176207 | 9.623  | 65 | 13.3 | Chr15: 67.990415 | -0.160 |
| 234<br><input type="checkbox"/> | MA_M2F_0706_R | <a href="#">1427658_at</a>   | <a href="#">Ctbs</a>          | chitinase, di-N-acetyl-                                                                       | Chr3: 146.459677 | 8.061  | 65 | 11.6 | Chr2: 134.800968 | 0.187  |
| 235<br><input type="checkbox"/> | MA_M2F_0706_R | <a href="#">1426216_at</a>   | <a href="#">Coq6</a>          | component of oligomeric golgi complex 6                                                       | Chr3: 52.982493  | 10.023 | 65 | 13.6 | ChrX: 92.675500  | -0.134 |
| 236<br><input type="checkbox"/> | MA_M2F_0706_R | <a href="#">1449666_at</a>   | <a href="#">Atrnl1</a>        | attractin like 1; antisense of distal 3' UTR                                                  | Chr19: 58.132875 | 8.404  | 65 | 12.5 | Chr10: 73.927005 | 0.049  |
| 237<br><input type="checkbox"/> | MA_M2F_0706_R | <a href="#">1434332_at</a>   | <a href="#">Zzz3</a>          | zinc finger, ZZ domain containing 3; mid to distal 3' UTR (transQTL on chr 4 in BXD Eye Data) | Chr3: 152.458886 | 10.318 | 65 | 13.1 | Chr2: 181.014276 | 0.115  |

|                                 |               |                              |                 |                                                                       |                  |            |    |      |                  |                |
|---------------------------------|---------------|------------------------------|-----------------|-----------------------------------------------------------------------|------------------|------------|----|------|------------------|----------------|
| 238<br><input type="checkbox"/> | MA_M2F_0706_R | <a href="#">1424280_at</a>   | <u>Mospd1</u>   | motile sperm domain containing 1; mid to distal 3' UTR                | ChrX: 53.345058  | 9.18<br>9  | 65 | 9.3  | Chr11: 4.784489  | -<br>0.13<br>2 |
| 239<br><input type="checkbox"/> | MA_M2F_0706_R | <a href="#">1428335_a_at</a> | <u>Scfd1</u>    | sec1 family domain containing 1; last six exons of short form message | Chr12: 51.431515 | 10.2<br>65 | 65 | 8.8  | ChrX: 64.161107  | -<br>0.14<br>7 |
| 240<br><input type="checkbox"/> | MA_M2F_0706_R | <a href="#">1418222_at</a>   | <u>Noa1</u>     | nitric oxide associated 1; 4 exons                                    | Chr5: 77.294479  | 8.94<br>8  | 65 | 11.1 | Chr7: 66.458029  | 0.13<br>6      |
| 241<br><input type="checkbox"/> | MA_M2F_0706_R | <a href="#">1451135_at</a>   | <u>Gtf2b</u>    | general transcription factor IIB; 2 exons and 3'UTR                   | Chr3: 142.781484 | 10.8<br>55 | 65 | 12.4 | Chr16: 11.961405 | -<br>0.07<br>6 |
| 242<br><input type="checkbox"/> | MA_M2F_0706_R | <a href="#">1455439_a_at</a> | <u>Lgals1</u>   | lectin, galactose binding, soluble 1; last exon and proximal 3' UTR   | Chr15: 78.930026 | 13.0<br>86 | 65 | 10.7 | Chr6: 49.309149  | 0.17<br>1      |
| 243<br><input type="checkbox"/> | MA_M2F_0706_R | <a href="#">1456255_at</a>   | <u>Kiaa0368</u> | proteasome-associated protein ECM29 homolog                           | Chr4: 58.844163  | 6.43<br>9  | 65 | 8.7  | Chr15: 63.392263 | -<br>0.08<br>5 |
| 244<br><input type="checkbox"/> | MA_M2F_0706_R | <a href="#">1451124_at</a>   | <u>Sod1</u>     | superoxide dismutase 1, soluble; first four exons and 3' UTR          | Chr16: 90.222782 | 13.7<br>68 | 65 | 8.3  | Chr2: 17.898115  | 0.19<br>8      |
| 245<br><input type="checkbox"/> | MA_M2F_0706_R | <a href="#">1428307_at</a>   | <u>Zdhhc13</u>  | zinc finger, DHHC domain containing 13; 2 exons and 3'UTR             | Chr7: 48.826869  | 9.83<br>4  | 65 | 11.9 | Chr10: 67.616312 | -<br>0.10<br>0 |
| 246<br><input type="checkbox"/> | MA_M2F_0706_R | <a href="#">1418974_at</a>   | <u>Blzf1</u>    | basic leucine zipper nuclear factor 1                                 | Chr1: 164.292202 | 8.46<br>6  | 65 | 9.2  | Chr12: 51.647704 | 0.09<br>7      |
| 247<br><input type="checkbox"/> | MA_M2F_0706_R | <a href="#">1437295_at</a>   | <u>Pkn2</u>     | protein kinase N2                                                     | Chr3: 142.792158 | 9.47<br>3  | 65 | 13.0 | Chr15: 69.108222 | -<br>0.19<br>5 |
| 248<br><input type="checkbox"/> | MA_M2F_0706_R | <a href="#">1450348_at</a>   | <u>Slc19a3</u>  | solute carrier family 19 (sodium/hydrogen exchanger), member 3        | Chr1: 83.014703  | 7.71<br>0  | 65 | 10.4 | Chr3: 25.041091  | 0.15<br>9      |
| 249<br><input type="checkbox"/> | MA_M2F_0706_R | <a href="#">1454929_s_at</a> | <u>AU018122</u> | hypothetical protein E130307D12                                       | Chr17: 56.606034 | 10.9<br>13 | 65 | 13.9 | Chr2: 138.500000 | -<br>0.14<br>0 |



|                                 |               |                              |                              |                                                                                                   |                  |        |    |      |                   |        |
|---------------------------------|---------------|------------------------------|------------------------------|---------------------------------------------------------------------------------------------------|------------------|--------|----|------|-------------------|--------|
| 250<br><input type="checkbox"/> | MA_M2F_0706_R | <a href="#">1431745_a_at</a> | <u><i>Zc3h14</i></u>         | zinc finger CCCH type containing 14; exons 13, 14, 15, and 16 (transQTL on Chr 4 in BXD eye data) | Chr12: 98.783584 | 11.764 | 65 | 9.5  | Chr14: 81.380779  | -0.074 |
| 251<br><input type="checkbox"/> | MA_M2F_0706_R | <a href="#">1427466_at</a>   | <u><i>Pigu</i></u>           | phosphatidylinositol glycan anchor biosynthesis, class U (Pigu)                                   | Chr2: 155.278639 | 7.436  | 65 | 14.9 | Chr15: 28.321742  | 0.109  |
| 252<br><input type="checkbox"/> | MA_M2F_0706_R | <a href="#">1450745_at</a>   | <u><i>C1galt1</i></u>        | core 1 synthase, glycoprotein-N-acetylgalactosamine 3-beta-galactosyltransferase                  | Chr6: 7.871503   | 9.260  | 65 | 9.8  | ChrX: 84.597186   | -0.168 |
| 253<br><input type="checkbox"/> | MA_M2F_0706_R | <a href="#">1426824_at</a>   | <u><i>Psme4</i></u>          | proteasome (prosome, macropain) activator subunit 4                                               | Chr11: 30.856055 | 10.899 | 65 | 16.3 | ChrX: 73.028443   | -0.227 |
| 254<br><input type="checkbox"/> | MA_M2F_0706_R | <a href="#">1423612_at</a>   | <u><i>Clp1</i></u>           | ATP/GTP-binding protein; last exon and proximal 3' UTR                                            | Chr2: 84.723372  | 8.531  | 65 | 14.8 | Chr2: 134.800968  | 0.158  |
| 255<br><input type="checkbox"/> | MA_M2F_0706_R | <a href="#">1444141_at</a>   | <u><i>Snx13</i></u>          | sorting nexin 13; exons 13 through 17                                                             | Chr12: 35.106769 | 6.774  | 65 | 10.6 | Chr3: 128.292533  | 0.091  |
| 256<br><input type="checkbox"/> | MA_M2F_0706_R | <a href="#">1453263_at</a>   | <u><i>Mak10</i></u>          | MAK10 homolog, amino-acid N-acetyltransferase subunit, ( <i>S. cerevisiae</i> )                   | Chr13: 59.600932 | 7.823  | 65 | 9.0  | Chr2: 134.800968  | 0.116  |
| 257<br><input type="checkbox"/> | MA_M2F_0706_R | <a href="#">1453533_at</a>   | <u><i>4933403_Q08Rik</i></u> | RIKEN cDNA 4933403O08 gene                                                                        | ChrX: 112.243333 | 6.049  | 65 | 10.3 | Chr10: 121.639039 | 0.043  |
| 258<br><input type="checkbox"/> | MA_M2F_0706_R | <a href="#">1427321_s_at</a> | <u><i>Cxadr</i></u>          | coxsackievirus and adenovirus receptor; distal 3' UTR                                             | Chr16: 78.338806 | 8.548  | 65 | 12.8 | Chr10: 67.616312  | -0.155 |
| 259<br><input type="checkbox"/> | MA_M2F_0706_R | <a href="#">1451770_s_at</a> | <u><i>Dhx9</i></u>           | DEAH (Asp-Glu-Ala-His) box polypeptide 9                                                          | Chr1: 153.455871 | 10.770 | 65 | 10.6 | Chr18: 65.174965  | -0.126 |
| 260<br><input type="checkbox"/> | MA_M2F_0706_R | <a href="#">1425199_a_at</a> | <u><i>Epb4.1l5</i></u>       | erythrocyte protein band 4.1-like 5; last exon and 3'UTR                                          | Chr1: 119.595376 | 10.901 | 65 | 11.8 | Chr2: 181.014276  | 0.125  |

|                                 |               |                              |                 |                                                                                                                                     |                   |           |    |      |                  |                |
|---------------------------------|---------------|------------------------------|-----------------|-------------------------------------------------------------------------------------------------------------------------------------|-------------------|-----------|----|------|------------------|----------------|
| 261<br><input type="checkbox"/> | MA_M2F_0706_R | <a href="#">1435646_at</a>   | <i>Ikbkg</i>    | inhibitor of kappaB kinase gamma                                                                                                    | ChrX: 74.449985   | 7.84<br>9 | 65 | 13.6 | ChrX: 73.876578  | -<br>0.18<br>1 |
| 262<br><input type="checkbox"/> | MA_M2F_0706_R | <a href="#">1419049_at</a>   | <i>Pcnx</i>     | pecanex homolog; mid 3' UTR                                                                                                         | Chr12: 81.998196  | 6.30<br>2 | 65 | 9.5  | Chr10: 73.927005 | -<br>0.05<br>6 |
| 263<br><input type="checkbox"/> | MA_M2F_0706_R | <a href="#">1424397_at</a>   | <i>Dhx36</i>    | DEAH (Asp-Glu-Ala-His) box polypeptide 36                                                                                           | Chr3: 62.470459   | 7.06<br>9 | 65 | 12.8 | Chr14: 3.000000  | 0.13<br>3      |
| 264<br><input type="checkbox"/> | MA_M2F_0706_R | <a href="#">1416132_at</a>   | <i>Efr3a</i>    | EFR3 homolog A (hearing loss associated, activity-dependent plasticity-associated multi-pass membrane KIAA0143 protein); five exons | Chr15: 65.854698  | 7.78<br>1 | 65 | 11.3 | Chr10: 67.616312 | -<br>0.15<br>1 |
| 265<br><input type="checkbox"/> | MA_M2F_0706_R | <a href="#">1422772_at</a>   | <i>C1galt1</i>  | core 1 synthase, glycoprotein-N-acetylgalactosamine 3-beta-galactosyltransferase; putative far 3' UTR                               | Chr6: 7.872849    | 8.97<br>4 | 65 | 13.5 | ChrX: 64.161107  | -<br>0.25<br>6 |
| 266<br><input type="checkbox"/> | MA_M2F_0706_R | <a href="#">1457949_at</a>   | <i>Nt5c2</i>    | 5'-nucleotidase, cytosolic II; putative exon                                                                                        | Chr19: 46.885497  | 7.80<br>8 | 65 | 9.6  | Chr10: 53.743148 | -<br>0.08<br>9 |
| 267<br><input type="checkbox"/> | MA_M2F_0706_R | <a href="#">1426411_a_at</a> | <i>Strbp</i>    | spermatid perinuclear RNA binding protein (interleukin enhancer binding factor 3-like)                                              | Chr2: 37.586519   | 7.88<br>7 | 65 | 11.6 | ChrX: 73.428893  | -<br>0.19<br>1 |
| 268<br><input type="checkbox"/> | MA_M2F_0706_R | <a href="#">1434918_at</a>   | <i>Sox6</i>     | SRY-box containing gene 6                                                                                                           | Chr7: 115.471185  | 9.71<br>4 | 65 | 11.0 | Chr11: 83.064807 | 0.11<br>3      |
| 269<br><input type="checkbox"/> | MA_M2F_0706_R | <a href="#">1438935_at</a>   | <i>BB234005</i> | expressed sequence BB234005                                                                                                         | Chr10: 128.362483 | 6.40<br>8 | 65 | 10.4 | Chr14: 9.528965  | 0.04<br>0      |
| 270<br><input type="checkbox"/> | MA_M2F_0706_R | <a href="#">1448309_at</a>   | <i>Ap3m1</i>    | adaptor-related protein complex 3, mu 1 subunit; last four exons and proximal 3' UTR                                                | Chr14: 21.036673  | 8.78<br>5 | 65 | 12.4 | ChrX: 61.058643  | -<br>0.17<br>9 |
| 271<br><input type="checkbox"/> | MA_M2F_0706_R | <a href="#">1418369_at</a>   | <i>Prim1</i>    | DNA primase, p49 subunit                                                                                                            | Chr10: 128.023845 | 8.67<br>7 | 65 | 10.9 | Chr11: 83.064807 | 0.17<br>1      |

|                                 |               |                              |                             |                                                                                   |                  |        |    |      |                   |        |
|---------------------------------|---------------|------------------------------|-----------------------------|-----------------------------------------------------------------------------------|------------------|--------|----|------|-------------------|--------|
| 272<br><input type="checkbox"/> | MA_M2F_0706_R | <a href="#">1438264_a_at</a> | <i><u>Tpp2</u></i>          | tripeptidyl peptidase II (serine exopeptidase of the 26S proteasome); three exons | Chr1: 43.980362  | 8.214  | 65 | 8.6  | Chr14: 3.000000   | 0.191  |
| 273<br><input type="checkbox"/> | MA_M2F_0706_R | <a href="#">1428087_at</a>   | <i><u>Dnm1l</u></i>         | dynamin 1-like (mitochondrial fission); proximal 3' UTR                           | Chr16: 16.313539 | 10.478 | 65 | 9.6  | Chr10: 68.340621  | -0.097 |
| 274<br><input type="checkbox"/> | MA_M2F_0706_R | <a href="#">1460207_s_at</a> | <i><u>E2f5</u></i>          | E2F transcription factor 5                                                        | Chr3: 14.605796  | 10.160 | 65 | 12.8 | Chr2: 181.014276  | 0.155  |
| 275<br><input type="checkbox"/> | MA_M2F_0706_R | <a href="#">1438365_x_at</a> | <i><u>Laptm4b</u></i>       | lysosomal-associated protein transmembrane 4B; distal 3' UTR                      | Chr15: 34.284138 | 13.172 | 65 | 11.7 | Chr2: 136.127470  | -0.134 |
| 276<br><input type="checkbox"/> | MA_M2F_0706_R | <a href="#">1450899_at</a>   | <i><u>Nedd1</u></i>         | neural precursor cell expressed, developmentally down-regulated gene 1            | Chr10: 92.685169 | 9.371  | 65 | 13.7 | Chr14: 3.000000   | 0.157  |
| 277<br><input type="checkbox"/> | MA_M2F_0706_R | <a href="#">1455541_a_at</a> | <i><u>4430402I18Rik</u></i> | RIKEN cDNA 4430402I18 gene                                                        | Chr19: 28.927648 | 6.988  | 65 | 23.1 | Chr2: 134.519309  | 0.132  |
| 278<br><input type="checkbox"/> | MA_M2F_0706_R | <a href="#">1416584_at</a>   | <i><u>Man2b2</u></i>        | mannosidase 2, alpha B2; second, third, and fourth exon from last, and mid 3' UTR | Chr5: 36.806997  | 9.356  | 65 | 9.5  | Chr13: 115.551768 | 0.132  |
| 279<br><input type="checkbox"/> | MA_M2F_0706_R | <a href="#">1425023_at</a>   | <i><u>Usp3</u></i>          | ubiquitin specific protease 3                                                     | Chr9: 66.517750  | 7.999  | 65 | 11.0 | Chr4: 102.851020  | 0.128  |
| 280<br><input type="checkbox"/> | MA_M2F_0706_R | <a href="#">1443962_at</a>   | <i><u>Tfdp2</u></i>         | transcription factor Dp 2                                                         | Chr9: 96.310545  | 7.909  | 65 | 9.4  | Chr2: 136.127470  | 0.120  |
| 281<br><input type="checkbox"/> | MA_M2F_0706_R | <a href="#">1425491_at</a>   | <i><u>Bmpr1a</u></i>        | bone morphogenetic protein receptor, type 1A                                      | Chr14: 34.414005 | 8.247  | 65 | 18.8 | ChrX: 73.428893   | -0.170 |
| 282<br><input type="checkbox"/> | MA_M2F_0706_R | <a href="#">1452496_at</a>   | <i><u>Atp11c</u></i>        | ATPase, class VI, type 11C                                                        | ChrX: 60.236631  | 6.884  | 65 | 9.6  | Chr11: 103.979646 | -0.102 |
| 283<br><input type="checkbox"/> | MA_M2F_0706_R | <a href="#">1448348_at</a>   | <i><u>Gpiap1</u></i>        | cell cycle associated protein 1 (cytoplasmic activation- and proliferation-       | Chr2: 103.773010 | 9.668  | 65 | 12.2 | Chr15: 89.576205  | -0.207 |

|                                 |               |                              |               |                                                                                                         |                  |       |    |     |                  |        |
|---------------------------------|---------------|------------------------------|---------------|---------------------------------------------------------------------------------------------------------|------------------|-------|----|-----|------------------|--------|
|                                 |               |                              |               | associated protein 1);<br>exons 9 through 12                                                            |                  |       |    |     |                  |        |
| 284<br><input type="checkbox"/> | MA_M2F_0706_R | <a href="#">1452780_at</a>   | <i>Gtf3c2</i> | general transcription factor IIIC, polypeptide 2, beta; last exon and 3' UTR (complex 3' UTR structure) | Chr5: 31.157418  | 9.868 | 65 | 8.5 | ChrX: 84.597186  | -0.097 |
| 285<br><input type="checkbox"/> | MA_M2F_0706_R | <a href="#">1431811_a_at</a> | <i>Fbxo34</i> | F-box only protein 34; 3' UTR from proximal to distal                                                   | Chr14: 47.531295 | 9.179 | 65 | 7.3 | Chr14: 19.755208 | 0.102  |

## Supplemental Table S9. Top 100 genes in male for 3 probes in Ace2

|                               | Dataset<br>⚙️ | Trait ID<br>⚙️               | Symbol<br>⚙️    | Description<br>⚙️                                                                   | Location<br>⚙️   | Mean<br>⚙️ | N Cases<br>⚙️ | Max LRS<br>⚙️ | Max LRS Location Chr and Mb<br>⚙️ | Add <sup>?</sup><br>⚙️ |
|-------------------------------|---------------|------------------------------|-----------------|-------------------------------------------------------------------------------------|------------------|------------|---------------|---------------|-----------------------------------|------------------------|
| 1<br><input type="checkbox"/> | MA_M2M_0706_R | <a href="#">1425103_at</a>   | <i>Ace2</i>     | angiotensin I converting enzyme (peptidyl-dipeptidase A) 2; middle to distal 3'-UTR | ChrX: 164.187853 | 10.201     | 45            | 12.0          | Chr1: 14.576853                   | 0.169                  |
| 2<br><input type="checkbox"/> | MA_M2M_0706_R | <a href="#">1425102_a_at</a> | <i>Ace2</i>     | angiotensin I converting enzyme (peptidyl-dipeptidase A) 2; 3'-UTR and last 4 exons | ChrX: 164.182645 | 10.127     | 45            | 10.2          | Chr9: 107.639250                  | 0.185                  |
| 3<br><input type="checkbox"/> | MA_M2M_0706_R | <a href="#">1438719_at</a>   | <i>AI585793</i> | expressed sequence AI585793                                                         | Chr18: 32.232049 | 7.583      | 45            | 13.0          | Chr18: 31.556239                  | -0.209                 |
| 4<br><input type="checkbox"/> | MA_M2M_0706_R | <a href="#">1452138_a_at</a> | <i>Ace2</i>     | angiotensin I converting enzyme (peptidyl-dipeptidase A) 2; last 2~6 and 11 exons   | ChrX: 164.167855 | 10.125     | 45            | 13.1          | Chr8: 89.094303                   | 0.214                  |

|                                |               |                              |                      |                                                                                                                        |                   |            |    |      |                   |                |
|--------------------------------|---------------|------------------------------|----------------------|------------------------------------------------------------------------------------------------------------------------|-------------------|------------|----|------|-------------------|----------------|
| 5<br><input type="checkbox"/>  | MA_M2M_0706_R | <a href="#">1459392_at</a>   | <i>Phf8</i>          | PHD finger protein 8                                                                                                   | ChrX: 151.625300  | 7.10<br>0  | 45 | 11.4 | Chr6: 125.820102  | 0.08<br>2      |
| 6<br><input type="checkbox"/>  | MA_M2M_0706_R | <a href="#">1439661_at</a>   | <i>Slc16a14</i>      | RIKEN cDNA 1110004H10 gene                                                                                             | Chr1: 84.905979   | 8.88<br>5  | 45 | 16.1 | Chr3: 65.524002   | -<br>0.34<br>9 |
| 7<br><input type="checkbox"/>  | MA_M2M_0706_R | <a href="#">1436874_x_at</a> | <i>Slc25a5</i>       | solute carrier family 25 (mitochondrial carrier, adenine nucleotide translocator), member 5; last two exons and 3' UTR | ChrX: 36.797832   | 16.4<br>02 | 45 | 8.3  | ChrX: 102.414526  | 0.08<br>1      |
| 8<br><input type="checkbox"/>  | MA_M2M_0706_R | <a href="#">1452609_at</a>   | <i>1190005I06Rik</i> | RIKEN cDNA 1190005I06 gene                                                                                             | Chr8: 120.608622  | 6.40<br>4  | 45 | 12.1 | Chr3: 69.025720   | 0.06<br>7      |
| 9<br><input type="checkbox"/>  | MA_M2M_0706_R | <a href="#">1460380_at</a>   | <i>Dsg2</i>          | desmoglein 2 (calcium-binding transmembrane glycoprotein, arrhythmogenic right ventricular dysplasia, familial 10)     | Chr18: 20.602254  | 7.39<br>4  | 45 | 8.0  | Chr15: 102.320887 | 0.06<br>9      |
| 10<br><input type="checkbox"/> | MA_M2M_0706_R | <a href="#">1423044_at</a>   | <i>Prosc</i>         | proline synthetase co-transcribed                                                                                      | Chr8: 27.054003   | 12.9<br>81 | 45 | 13.2 | Chr10: 110.416695 | -<br>0.12<br>5 |
| 11<br><input type="checkbox"/> | MA_M2M_0706_R | <a href="#">1430561_at</a>   | <i>Dnajb14</i>       | DnaJ (Hsp40) homolog, subfamily B, member 14; proximal and mid 3' UTR                                                  | Chr3: 137.908489  | 8.28<br>3  | 45 | 11.7 | Chr2: 78.100320   | 0.25<br>9      |
| 12<br><input type="checkbox"/> | MA_M2M_0706_R | <a href="#">1438736_at</a>   | <i>Thoc2</i>         | THO complex 2; four exons                                                                                              | ChrX: 41.822401   | 8.38<br>9  | 45 | 8.7  | Chr3: 53.053282   | -<br>0.15<br>2 |
| 13<br><input type="checkbox"/> | MA_M2M_0706_R | <a href="#">1458499_at</a>   | <i>Pde10a</i>        | phosphodiesterase 10A; half distal 3' UTR                                                                              | Chr17: 8.985059   | 6.98<br>8  | 45 | 12.8 | Chr2: 169.897347  | 0.06<br>0      |
| 14<br><input type="checkbox"/> | MA_M2M_0706_R | <a href="#">1452270_s_at</a> | <i>Cubn</i>          | cubilin (intrinsic factor-cobalamin receptor)                                                                          | Chr2: 13.276377   | 14.2<br>28 | 45 | 17.2 | ChrX: 102.126656  | 0.18<br>6      |
| 15<br><input type="checkbox"/> | MA_M2M_0706_R | <a href="#">1430542_a_at</a> | <i>Slc25a5</i>       | solute carrier family 25 (mitochondrial carrier, adenine nucleotide translocator), member 5                            | ChrX: 36.798388   | 16.0<br>91 | 45 | 10.0 | Chr7: 71.696966   | 0.08<br>9      |
| 16<br><input type="checkbox"/> | MA_M2M_0706_R | <a href="#">1440486_at</a>   | <i>C12orf41</i>      | human chromosome 12 open reading frame 41; far 3' UTR                                                                  | Chr15: 98.517815  | 7.54<br>2  | 45 | 8.7  | Chr13: 3.150000   | 0.08<br>1      |
| 17<br><input type="checkbox"/> | MA_M2M_0706_R | <a href="#">1436747_at</a>   | <i>LOC280487</i>     | pol polyprotein                                                                                                        | Chr11: 116.438594 | 12.0<br>33 | 45 | 13.7 | Chr13: 103.949936 | -<br>0.14<br>4 |
| 18<br><input type="checkbox"/> | MA_M2M_0706_R | <a href="#">1459699_at</a>   | <i>Tem7</i>          | ESTs                                                                                                                   | Chr4: 136.203427  | 6.24<br>1  | 45 | 10.2 | Chr10: 110.416695 | 0.07<br>3      |

|                                |               |                              |                      |                                                                                                           |                  |        |    |      |                   |        |
|--------------------------------|---------------|------------------------------|----------------------|-----------------------------------------------------------------------------------------------------------|------------------|--------|----|------|-------------------|--------|
| 19<br><input type="checkbox"/> | MA_M2M_0706_R | <a href="#">1451837_at</a>   | <i>Ap3b2</i>         | adaptor-related protein complex 3, beta 2 subunit                                                         | Chr7: 81.474401  | 6.410  | 45 | 9.6  | Chr6: 32.610603   | 0.072  |
| 20<br><input type="checkbox"/> | MA_M2M_0706_R | <a href="#">1420500_at</a>   | <i>Dnajc1</i>        | DnaJ (Hsp40) homolog, subfamily C, member 1; last 2 exons and 3' UTR                                      | Chr2: 18.217204  | 8.557  | 45 | 12.0 | Chr13: 103.949936 | 0.169  |
| 21<br><input type="checkbox"/> | MA_M2M_0706_R | <a href="#">1448803_at</a>   | <i>Golga4</i>        | golgi autoantigen, golgin subfamily a, 4                                                                  | Chr9: 118.556220 | 8.990  | 45 | 10.5 | Chr7: 6.024860    | 0.285  |
| 22<br><input type="checkbox"/> | MA_M2M_0706_R | <a href="#">1422495_a_at</a> | <i>Hmgn1</i>         | high mobility group nucleosomal binding domain 1; mid 3' UTR                                              | Chr16: 18.938220 | 13.533 | 45 | 9.3  | Chr10: 87.643399  | -0.098 |
| 23<br><input type="checkbox"/> | MA_M2M_0706_R | <a href="#">1432448_at</a>   | <i>2600006K01Rik</i> | RIKEN cDNA 2600006K01 gene                                                                                | Chr2: 29.868759  | 6.842  | 45 | 8.0  | Chr12: 115.550550 | 0.069  |
| 24<br><input type="checkbox"/> | MA_M2M_0706_R | <a href="#">1447571_at</a>   | <i>Elk4</i>          | ELK4, member of ETS oncogene family                                                                       | Chr1: 132.026246 | 10.159 | 45 | 8.4  | Chr2: 70.613187   | -0.089 |
| 25<br><input type="checkbox"/> | MA_M2M_0706_R | <a href="#">1456979_at</a>   | <i>Zhx3</i>          | zinc fingers and homeoboxes 3                                                                             | Chr2: 160.856133 | 8.270  | 45 | 6.8  | Chr9: 68.339182   | 0.120  |
| 26<br><input type="checkbox"/> | MA_M2M_0706_R | <a href="#">1421613_at</a>   | <i>H2afy2</i>        | H2A histone family, member Y2                                                                             | Chr15: 62.217666 | 5.902  | 45 | 9.6  | ChrX: 115.338127  | 0.050  |
| 27<br><input type="checkbox"/> | MA_M2M_0706_R | <a href="#">1443053_at</a>   | <i>Ptprd</i>         | protein tyrosine phosphatase, receptor type, D; intron 1 (from EST AK053007)                              | Chr4: 76.435514  | 7.633  | 45 | 33.9 | Chr4: 75.840751   | -0.372 |
| 28<br><input type="checkbox"/> | MA_M2M_0706_R | <a href="#">1417623_at</a>   | <i>Slc12a2</i>       | solute carrier family 12, member 2                                                                        | Chr18: 57.930155 | 7.756  | 45 | 14.1 | Chr11: 33.490349  | 0.261  |
| 29<br><input type="checkbox"/> | MA_M2M_0706_R | <a href="#">1445669_at</a>   | <i>Spry4</i>         | sprouty homolog 4 (Drosophila)                                                                            | Chr18: 38.586291 | 6.072  | 45 | 6.5  | Chr9: 29.939029   | -0.054 |
| 30<br><input type="checkbox"/> | MA_M2M_0706_R | <a href="#">1437082_at</a>   | <i>Akap9</i>         | A kinase (PRKA) anchor protein (yotiao) 9; exons 3, 4, and 5 and distal end of intron 3                   | Chr5: 3.954395   | 6.823  | 45 | 13.1 | Chr2: 178.717318  | 0.120  |
| 31<br><input type="checkbox"/> | MA_M2M_0706_R | <a href="#">1457639_at</a>   | <i>Atp6v1h</i>       | ATPase, H <sup>+</sup> transporting, lysosomal, V1 subunit H; intronic or alternative splicing (AK081492) | Chr1: 5.099623   | 6.534  | 45 | 9.4  | Chr2: 69.342849   | 0.116  |
| 32<br><input type="checkbox"/> | MA_M2M_0706_R | <a href="#">1436983_at</a>   | <i>Crebbp</i>        | CREB binding protein; two exons toward 3' end of gene                                                     | Chr16: 4.093487  | 8.419  | 45 | 11.1 | Chr2: 78.100320   | 0.285  |
| 33<br><input type="checkbox"/> | MA_M2M_0706_R | <a href="#">1447014_at</a>   | <i>AK144361</i>      | AK144361 EST expressed in CNS; 3' end, possible association with Ccdc115                                  | Chr1: 58.510627  | 7.288  | 45 | 9.7  | Chr3: 54.220588   | 0.075  |

|         |               |                            |                      |                                                                                                                                           |                   |        |    |      |                  |        |
|---------|---------------|----------------------------|----------------------|-------------------------------------------------------------------------------------------------------------------------------------------|-------------------|--------|----|------|------------------|--------|
| 34<br>☐ | MA_M2M_0706_R | <a href="#">1456717_at</a> | <i>Tead1</i>         | TEA domain family member 1 (SV40 transcriptional enhancer factor, Sveinsson's chorioretinal atrophy)                                      | Chr7: 112.681339  | 5.970  | 45 | 8.6  | Chr3: 129.497470 | 0.148  |
| 35<br>☐ | MA_M2M_0706_R | <a href="#">1433862_at</a> | <i>Espl1</i>         | extra spindle poles-like 1 (S. cerevisiae)                                                                                                | Chr15: 102.324051 | 6.435  | 45 | 9.1  | Chr3: 69.025720  | 0.055  |
| 36<br>☐ | MA_M2M_0706_R | <a href="#">1460612_at</a> | <i>Ranbp3</i>        | RAN binding protein 3                                                                                                                     | --                | 7.075  | 45 | 9.7  | Chr1: 82.904438  | 0.101  |
| 37<br>☐ | MA_M2M_0706_R | <a href="#">1444430_at</a> | <i>Armc8</i>         | armadillo repeat containing 8                                                                                                             | Chr9: 99.506820   | 6.708  | 45 | 13.4 | Chr6: 16.056743  | -0.131 |
| 38<br>☐ | MA_M2M_0706_R | <a href="#">1442277_at</a> | <i>Chka</i>          | choline kinase alpha; last intron or 3' UTR                                                                                               | Chr19: 3.865325   | 8.170  | 45 | 8.2  | Chr2: 69.724603  | 0.171  |
| 39<br>☐ | MA_M2M_0706_R | <a href="#">1456340_at</a> | <i>2610205E22Rik</i> | RIKEN cDNA 2610205E22 gene                                                                                                                | Chr2: 30.817111   | 8.020  | 45 | 11.7 | Chr2: 78.100320  | 0.207  |
| 40<br>☐ | MA_M2M_0706_R | <a href="#">1457233_at</a> | <i>Dnaja2</i>        | DnaJ (Hsp40) homolog, subfamily A, member 2                                                                                               | Chr8: 85.554238   | 8.731  | 45 | 17.9 | Chr8: 83.183208  | -0.170 |
| 41<br>☐ | MA_M2M_0706_R | <a href="#">1446508_at</a> | <i>D430017M14Rik</i> | 13 days embryo male testis cDNA, RIKEN full-length enriched library, clone:6030447N08 product:unknown EST, full insert sequence.          | Chr15: 68.343881  | 7.051  | 45 | 17.1 | Chr4: 88.045738  | -0.120 |
| 42<br>☐ | MA_M2M_0706_R | <a href="#">1432980_at</a> | <i>Dock4</i>         | dedicator of cytokinesis 4                                                                                                                | Chr12: 40.770053  | 5.977  | 45 | 8.9  | Chr6: 54.397647  | 0.062  |
| 43<br>☐ | MA_M2M_0706_R | <a href="#">1451494_at</a> | <i>Wac</i>           | WW domain containing adaptor with coiled-coil; exons 12 and 14, and proximal 3' UTR                                                       | Chr18: 7.926111   | 10.545 | 45 | 11.2 | Chr18: 61.000000 | -0.172 |
| 44<br>☐ | MA_M2M_0706_R | <a href="#">1449292_at</a> | <i>Rb1cc1</i>        | RB1-inducible coiled-coil 1; exon 13                                                                                                      | Chr1: 6.248798    | 7.287  | 45 | 7.9  | Chr7: 6.024860   | 0.269  |
| 45<br>☐ | MA_M2M_0706_R | <a href="#">1447109_at</a> | <i>Elavl1</i>        | ELAV (embryonic lethal, abnormal vision, Drosophila)-like 1 (Hu antigen R); intron                                                        | Chr8: 4.291945    | 6.584  | 45 | 8.2  | Chr9: 110.638628 | 0.072  |
| 46<br>☐ | MA_M2M_0706_R | <a href="#">1459347_at</a> | <i>C130032J12Rik</i> | 16 days neonate cerebellum cDNA, RIKEN full-length enriched library, clone:9630040P08 product:hypothetical protein, full insert sequence. | Chr11: 77.912165  | 7.794  | 45 | 15.1 | Chr17: 83.262662 | -0.081 |

|    |               |                              |                 |                                                                                                                          |                   |            |    |      |                  |                |
|----|---------------|------------------------------|-----------------|--------------------------------------------------------------------------------------------------------------------------|-------------------|------------|----|------|------------------|----------------|
| 47 | MA_M2M_0706_R | <a href="#">1421412_at</a>   | <i>Gsc</i>      | goosecoid                                                                                                                | Chr12: 104.471487 | 6.27<br>1  | 45 | 11.5 | Chr6: 23.372761  | 0.05<br>0      |
| 48 | MA_M2M_0706_R | <a href="#">1425038_at</a>   | <i>Slc22a19</i> | solute carrier family 22 (organic anion transporter), member 19                                                          | Chr19: 7.673214   | 12.5<br>74 | 45 | 18.0 | Chr14: 74.747362 | 0.23<br>1      |
| 49 | MA_M2M_0706_R | <a href="#">1425119_at</a>   | <i>Oas1b</i>    | 2'-5' oligoadenylate synthetase 1B                                                                                       | Chr5: 120.823572  | 8.64<br>7  | 45 | 11.4 | ChrX: 102.424804 | 0.10<br>2      |
| 50 | MA_M2M_0706_R | <a href="#">1449825_at</a>   | <i>Actrt1</i>   | activity response to ethanol 4                                                                                           | ChrX: 46.329998   | 6.79<br>2  | 45 | 12.4 | Chr6: 124.528197 | 0.08<br>9      |
| 51 | MA_M2M_0706_R | <a href="#">1425565_at</a>   | <i>Rest</i>     | RE1-silencing transcription factor; last exon (5' end)                                                                   | Chr5: 77.280782   | 9.44<br>6  | 45 | 8.4  | Chr2: 18.263847  | -<br>0.15<br>6 |
| 52 | MA_M2M_0706_R | <a href="#">1423772_x_at</a> | <i>Slc25a5</i>  | solute carrier family 25 (mitochondrial carrier, adenine nucleotide translocator), member 5; last two exons and 3' UTR   | ChrX: 36.797736   | 16.0<br>17 | 45 | 12.0 | Chr14: 39.833599 | 0.09<br>0      |
| 53 | MA_M2M_0706_R | <a href="#">1460654_at</a>   | <i>Slc30a3</i>  | solute carrier family 30 (zinc transporter), member 3; 3' UTR                                                            | Chr5: 31.086248   | 8.82<br>2  | 45 | 12.0 | Chr2: 70.613187  | -<br>0.08<br>5 |
| 54 | MA_M2M_0706_R | <a href="#">1418012_at</a>   | <i>Sh3glb1</i>  | SH3-domain GRB2-like B1 (endophilin); mid 3' UTR                                                                         | Chr3: 144.686958  | 10.1<br>53 | 45 | 9.7  | ChrX: 133.505754 | -<br>0.16<br>9 |
| 55 | MA_M2M_0706_R | <a href="#">1426586_at</a>   | <i>Slc25a11</i> | solute carrier family 25 (mitochondrial carrier; oxoglutarate carrier), member 11; exons 5,6, and 8, and proximal 3' UTR | Chr11: 70.644618  | 13.2<br>09 | 45 | 13.3 | Chr2: 104.427306 | -<br>0.11<br>3 |
| 56 | MA_M2M_0706_R | <a href="#">1427309_at</a>   | <i>Pars2</i>    | prolyl-tRNA synthetase (mitochondrial); 3' UTR                                                                           | Chr4: 106.654706  | 8.91<br>0  | 45 | 12.3 | Chr5: 21.026344  | -<br>0.11<br>0 |
| 57 | MA_M2M_0706_R | <a href="#">1423714_at</a>   | <i>Asf1b</i>    | ASF1 anti-silencing function 1 homolog B (histone chaperone); 3' UTR                                                     | Chr8: 83.969636   | 8.02<br>2  | 45 | 11.1 | ChrX: 115.338127 | 0.07<br>3      |
| 58 | MA_M2M_0706_R | <a href="#">1448842_at</a>   | <i>Cdo1</i>     | cysteine dioxygenase 1, cytosolic                                                                                        | Chr18: 46.713542  | 12.5<br>20 | 45 | 19.8 | Chr18: 46.275839 | 0.24<br>0      |
| 59 | MA_M2M_0706_R | <a href="#">1420247_at</a>   | <i>Glb1l</i>    | galactosidase, beta 1-like                                                                                               | Chr1: 75.199222   | 6.37<br>0  | 45 | 12.5 | Chr6: 124.528197 | 0.04<br>5      |
| 60 | MA_M2M_0706_R | <a href="#">1425156_at</a>   | <i>Gbp7</i>     | guanylate binding protein 7                                                                                              | Chr3: 142.546476  | 8.02<br>2  | 45 | 13.7 | Chr3: 139.354330 | 0.15<br>1      |
| 61 | MA_M2M_0706_R | <a href="#">1416309_at</a>   | <i>Nusap1</i>   | nucleolar and spindle associated protein 1                                                                               | Chr2: 119.649197  | 6.99<br>3  | 45 | 15.9 | Chr9: 107.650604 | 0.13<br>3      |



|         |               |                              |                      |                                                                                                             |                  |            |    |      |                  |                |
|---------|---------------|------------------------------|----------------------|-------------------------------------------------------------------------------------------------------------|------------------|------------|----|------|------------------|----------------|
| 62<br>☐ | MA_M2M_0706_R | <a href="#">1423775_s_at</a> | <i>Prc1</i>          | protein regulator of cytokinesis 1                                                                          | Chr7: 80.315784  | 7.77<br>6  | 45 | 9.4  | Chr3: 65.524002  | 0.07<br>3      |
| 63<br>☐ | MA_M2M_0706_R | <a href="#">1454426_at</a>   | <i>4930519E07Rik</i> | RIKEN cDNA 4930519E07 gene                                                                                  | Chr5: 41.282301  | 7.17<br>1  | 45 | 10.8 | Chr11: 74.110266 | 0.05<br>7      |
| 64<br>☐ | MA_M2M_0706_R | <a href="#">1420583_a_at</a> | <i>Rora</i>          | retinoic acid receptor-related orphan receptor alpha; last four exons and proximal 3' UTR                   | Chr9: 69.374033  | 9.23<br>2  | 45 | 13.6 | Chr4: 96.896949  | -<br>0.20<br>2 |
| 65<br>☐ | MA_M2M_0706_R | <a href="#">1430820_a_at</a> | <i>Bbx</i>           | bobby sox HMG-BOX transcription factor; exons 6, 7, and 8                                                   | Chr16: 50.224892 | 7.64<br>3  | 45 | 11.2 | Chr5: 25.445855  | 0.27<br>1      |
| 66<br>☐ | MA_M2M_0706_R | <a href="#">1458028_at</a>   | <i>LOC231291</i>     | hypothetical protein LOC231291                                                                              | Chr11: 78.846291 | 8.09<br>3  | 45 | 11.9 | Chr6: 125.820102 | 0.07<br>7      |
| 67<br>☐ | MA_M2M_0706_R | <a href="#">1442603_at</a>   | <i>Pb1</i>           | PAX interacting (with transcription-activation domain) protein 1                                            | Chr14: 31.060130 | 6.17<br>8  | 45 | 8.6  | Chr4: 5.599068   | -<br>0.08<br>6 |
| 68<br>☐ | MA_M2M_0706_R | <a href="#">1427703_at</a>   | <i>Pafah1b1</i>      | platelet-activating factor acetylhydrolase, isoform 1b, beta 1 subunit                                      | Chr11: 74.678355 | 7.40<br>6  | 45 | 7.9  | Chr3: 151.382601 | 0.08<br>8      |
| 69<br>☐ | MA_M2M_0706_R | <a href="#">1439816_at</a>   | <i>4930418G15Rik</i> | RIKEN cDNA 4930418G15 gene; far 3' UTR or unknown neighboring gene                                          | Chr1: 9.960201   | 7.67<br>1  | 45 | 47.9 | Chr1: 10.162992  | -<br>0.71<br>5 |
| 70<br>☐ | MA_M2M_0706_R | <a href="#">1428040_at</a>   | <i>Onecut3</i>       | one cut domain, family member 3                                                                             | Chr10: 80.495963 | 6.03<br>0  | 45 | 13.5 | Chr4: 88.045738  | 0.03<br>9      |
| 71<br>☐ | MA_M2M_0706_R | <a href="#">1441927_at</a>   | <i>Syt7</i>          | synaptotagmin 7; distal 3' UTR                                                                              | Chr19: 10.451478 | 8.16<br>9  | 45 | 8.2  | Chr12: 37.639776 | -<br>0.19<br>8 |
| 72<br>☐ | MA_M2M_0706_R | <a href="#">1441580_at</a>   | <i>Sgpp2</i>         | sphingosine-1-phosphate phosphatase 2                                                                       | Chr1: 78.392722  | 7.53<br>7  | 45 | 11.8 | Chr4: 131.999242 | -<br>0.07<br>8 |
| 73<br>☐ | MA_M2M_0706_R | <a href="#">1450650_at</a>   | <i>Myo10</i>         | myosin X (conventional non-muscle myosin heavy chain IIB, May-Hegglin anomaly); last three exons and 3' UTR | Chr15: 25.808154 | 9.52<br>4  | 45 | 10.2 | Chr1: 37.639250  | -<br>0.20<br>9 |
| 74<br>☐ | MA_M2M_0706_R | <a href="#">1456611_at</a>   | <i>Fam13a</i>        | Precm1 protein, family with sequence similarity 13, member A; mid-distal 3' UTR                             | Chr6: 58.934091  | 10.4<br>82 | 45 | 14.0 | Chr3: 65.524002  | 0.20<br>9      |
| 75<br>☐ | MA_M2M_0706_R | <a href="#">1453841_at</a>   | <i>Laf4</i>          | lymphoid nuclear protein related to AF4                                                                     | Chr1: 38.554285  | 5.98<br>0  | 45 | 10.6 | Chr6: 43.826811  | 0.05<br>6      |

|                                |               |                              |                       |                                                                                                                                                                                |                  |            |    |      |                   |                |
|--------------------------------|---------------|------------------------------|-----------------------|--------------------------------------------------------------------------------------------------------------------------------------------------------------------------------|------------------|------------|----|------|-------------------|----------------|
| 76<br><input type="checkbox"/> | MA_M2M_0706_R | <a href="#">1424089_a_at</a> | <i>Tcf4</i>           | transcription factor 4; last three exons and proximal 3' UTR                                                                                                                   | Chr18: 69.681618 | 7.59<br>3  | 45 | 12.9 | Chr10: 115.872274 | 0.13<br>1      |
| 77<br><input type="checkbox"/> | MA_M2M_0706_R | <a href="#">1437862_at</a>   | <i>Rbm25</i>          | RNA binding motif protein 25; distal 3' UTR of short form message                                                                                                              | Chr12: 83.663292 | 9.09<br>9  | 45 | 16.1 | Chr7: 6.024860    | 0.40<br>9      |
| 78<br><input type="checkbox"/> | MA_M2M_0706_R | <a href="#">1449439_at</a>   | <i>Klf7</i>           | Kruppel-like factor 7 (ubiquitous); far 3' UTR                                                                                                                                 | Chr1: 64.032879  | 7.89<br>5  | 45 | 12.1 | Chr5: 131.541036  | -<br>0.13<br>6 |
| 79<br><input type="checkbox"/> | MA_M2M_0706_R | <a href="#">1415967_at</a>   | <i>Ndufv1</i>         | NADH dehydrogenase (ubiquinone) flavoprotein 1, 51kDa (NADH:ubiquinone oxidoreductase complex I component); exons 7, 8, and 9 (of 10)                                          | Chr19: 4.007837  | 14.0<br>21 | 45 | 11.7 | ChrX: 114.159505  | 0.08<br>6      |
| 80<br><input type="checkbox"/> | MA_M2M_0706_R | <a href="#">1442362_at</a>   | <i>Gm104</i>          | predicted gene 104 downstream of Exo1; possible 3' UTR extension of Exo1                                                                                                       | Chr1: 175.921524 | 6.51<br>6  | 45 | 13.0 | Chr5: 127.781724  | 0.05<br>8      |
| 81<br><input type="checkbox"/> | MA_M2M_0706_R | <a href="#">1444678_at</a>   | <i>2810403 D21Rik</i> | RIKEN cDNA 2810403D21 gene                                                                                                                                                     | ChrX: 108.874391 | 5.59<br>9  | 45 | 14.1 | Chr9: 105.774381  | 0.03<br>5      |
| 82<br><input type="checkbox"/> | MA_M2M_0706_R | <a href="#">1415929_at</a>   | <i>Map1lc3b</i>       | microtubule-associated protein 1 light chain 3 beta (autophagy-related ubiquitin-like modifier LC3 B); distal 3' UTR                                                           | Chr8: 121.597478 | 13.3<br>29 | 45 | 11.8 | Chr3: 65.524002   | 0.10<br>2      |
| 83<br><input type="checkbox"/> | MA_M2M_0706_R | <a href="#">1460151_at</a>   | --                    | polymorphic LTR element; NACHT, leucine rich repeat and PYD containing 1                                                                                                       | Chr1: 13.621363  | 8.23<br>1  | 45 | 24.6 | Chr1: 13.073341   | -<br>0.32<br>2 |
| 84<br><input type="checkbox"/> | MA_M2M_0706_R | <a href="#">1434801_x_at</a> | <i>Slc25a5</i>        | solute carrier family 25 (mitochondrial carrier, adenine nucleotide translocator), member 5; last two exons and 3' UTR                                                         | ChrX: 36.797782  | 15.7<br>46 | 45 | 11.8 | Chr17: 64.993854  | -<br>0.09<br>7 |
| 85<br><input type="checkbox"/> | MA_M2M_0706_R | <a href="#">1457318_at</a>   | <i>A330008L17Rik</i>  | RIKEN cDNA A330008L17 gene                                                                                                                                                     | Chr8: 99.421618  | 7.36<br>1  | 45 | 10.8 | Chr10: 72.780330  | -<br>0.09<br>8 |
| 86<br><input type="checkbox"/> | MA_M2M_0706_R | <a href="#">1456965_at</a>   | <i>Kcnc1</i>          | potassium voltage gated channel, Shaw-related subfamily, member 1 (delayed rectifier, large fast spike repolarization current, TEA sensitive); antisense in 5' UTR or promoter | Chr7: 46.397015  | 8.15<br>4  | 45 | 11.8 | Chr14: 74.919381  | 0.10<br>2      |

|     |               |                              |                      |                                                                                                           |                   |        |    |      |                   |        |
|-----|---------------|------------------------------|----------------------|-----------------------------------------------------------------------------------------------------------|-------------------|--------|----|------|-------------------|--------|
| 87  | MA_M2M_0706_R | <a href="#">1432916_at</a>   | <i>5730407I07Rik</i> | RIKEN cDNA 5730407I07 gene                                                                                | Chr15: 33.599002  | 6.720  | 45 | 5.4  | Chr7: 120.814862  | 0.073  |
| 88  | MA_M2M_0706_R | <a href="#">1451126_at</a>   | <i>Maf1</i>          | MAF1 homolog, negative regulator of RNA polymerase III; last exon and proximal 3' UTR                     | Chr15: 76.353710  | 11.785 | 45 | 10.7 | Chr2: 70.613187   | -0.099 |
| 89  | MA_M2M_0706_R | <a href="#">1455964_at</a>   | <i>Cdk12</i>         | cyclin-dependent kinase 12; far 3' UTR                                                                    | Chr11: 98.253037  | 7.124  | 45 | 12.6 | Chr14: 39.196761  | -0.083 |
| 90  | MA_M2M_0706_R | <a href="#">1457041_at</a>   | <i>1700026B20Rik</i> | small nucleolar RNA host gene (non-protein coding) 10 (similar to human small Cajal body-specific RNA 13_ | Chr12: 105.030533 | 7.387  | 45 | 9.7  | Chr1: 37.639250   | 0.093  |
| 91  | MA_M2M_0706_R | <a href="#">1430649_at</a>   | <i>Baalc</i>         | brain and acute leukemia, cytoplasmic                                                                     | Chr15: 38.949833  | 8.243  | 45 | 12.0 | Chr2: 139.724059  | -0.079 |
| 92  | MA_M2M_0706_R | <a href="#">1415878_at</a>   | <i>Rrm1</i>          | ribonucleotide reductase M1                                                                               | Chr7: 102.468420  | 8.552  | 45 | 12.5 | Chr1: 80.325854   | 0.073  |
| 93  | MA_M2M_0706_R | <a href="#">1438634_x_at</a> | <i>Lasp1</i>         | LIM and SH3 protein 1; distal 3' UTR                                                                      | Chr11: 97.838653  | 11.906 | 45 | 10.7 | Chr2: 113.445288  | 0.199  |
| 94  | MA_M2M_0706_R | <a href="#">1417587_at</a>   | <i>Timeless</i>      | timeless homolog (Drosophila)                                                                             | Chr10: 128.243314 | 6.721  | 45 | 10.9 | Chr9: 85.995347   | 0.080  |
| 95  | MA_M2M_0706_R | <a href="#">1456319_at</a>   | <i>Mcpt9</i>         | mast cell protease 9                                                                                      | Chr14: 53.568242  | 7.141  | 45 | 10.5 | Chr14: 117.936145 | -0.219 |
| 96  | MA_M2M_0706_R | <a href="#">1436746_at</a>   | <i>Prkwnk1</i>       | protein kinase, lysine deficient 1; exons 4, 6 and 7                                                      | Chr6: 119.969525  | 9.367  | 45 | 9.9  | Chr2: 18.263847   | -0.355 |
| 97  | MA_M2M_0706_R | <a href="#">1444563_at</a>   | <i>AW494124</i>      | ESTs                                                                                                      | Chr2: 167.348354  | 8.082  | 45 | 12.3 | Chr2: 80.327515   | -0.125 |
| 98  | MA_M2M_0706_R | <a href="#">1448021_at</a>   | <i>Fam46c</i>        | family with sequence similarity 46, member C (protein LOC54855); far 3' UTR (putative)                    | Chr3: 100.468088  | 6.889  | 45 | 14.0 | Chr17: 71.025688  | 0.201  |
| 99  | MA_M2M_0706_R | <a href="#">1448447_at</a>   | <i>Vps28</i>         | vacuolar protein sorting 28; last 5 exons, intron 7, and 3' UTR                                           | Chr15: 76.622156  | 11.886 | 45 | 13.0 | Chr7: 71.410581   | 0.106  |
| 100 | MA_M2M_0706_R | <a href="#">1443212_at</a>   | <i>Large</i>         | like-glycosyltransferase; intron 1                                                                        | Chr8: 73.329777   | 6.474  | 45 | 17.2 | Chr10: 116.134021 | 0.055  |
| 101 | MA_M2M_0706_R | <a href="#">1427302_at</a>   | <i>Enpp3</i>         | ectonucleotide pyrophosphatase/phosphodiesterase 3                                                        | Chr10: 24.774787  | 10.693 | 45 | 21.0 | Chr8: 86.388770   | 0.168  |

|          |               |                              |                      |                                                                                                                                     |                   |            |    |      |                  |                |
|----------|---------------|------------------------------|----------------------|-------------------------------------------------------------------------------------------------------------------------------------|-------------------|------------|----|------|------------------|----------------|
| 102<br>☐ | MA_M2M_0706_R | <a href="#">1460619_at</a>   | <i>4931419K03Rik</i> | RIKEN cDNA 4931419K03 gene                                                                                                          | Chr1: 40.772316   | 8.81<br>6  | 45 | 10.6 | ChrX: 50.932422  | 0.18<br>7      |
| 103<br>☐ | MA_M2M_0706_R | <a href="#">1422476_at</a>   | <i>Ifi30</i>         | interferon gamma inducible protein 30                                                                                               | Chr8: 70.762817   | 11.7<br>63 | 45 | 11.5 | Chr4: 88.045738  | 0.15<br>8      |
| 104<br>☐ | MA_M2M_0706_R | <a href="#">1430796_at</a>   | <i>Trim14</i>        | tripartite motif-containing 14                                                                                                      | Chr4: 46.509689   | 5.99<br>9  | 45 | 10.5 | Chr5: 133.062783 | 0.03<br>2      |
| 105<br>☐ | MA_M2M_0706_R | <a href="#">1443544_at</a>   | <i>C18orf1</i>       | transmembrane neocortically enriched protein with low density lipoprotein receptor domain, human chromosome 18 open reading frame 1 | Chr18: 67.977763  | 7.04<br>4  | 45 | 14.7 | Chr1: 91.100378  | -<br>0.09<br>9 |
| 106<br>☐ | MA_M2M_0706_R | <a href="#">1417025_at</a>   | <i>H2-Eb1</i>        | histocompatibility 2, class II antigen E beta                                                                                       | Chr17: 34.314357  | 10.9<br>62 | 45 | 14.4 | Chr8: 123.289925 | -<br>0.27<br>9 |
| 107<br>☐ | MA_M2M_0706_R | <a href="#">1458761_at</a>   | <i>Itpa</i>          | inosine triphosphatase (nucleoside triphosphate pyrophosphatase)                                                                    | Chr2: 130.665163  | 5.73<br>2  | 45 | 15.8 | Chr15: 12.687693 | -<br>0.04<br>3 |
| 108<br>☐ | MA_M2M_0706_R | <a href="#">1420202_at</a>   | <i>S100a3</i>        | Mus musculus transcribed sequence                                                                                                   | --                | 5.57<br>7  | 45 | 12.5 | Chr19: 27.531578 | -<br>0.04<br>3 |
| 109<br>☐ | MA_M2M_0706_R | <a href="#">1450646_at</a>   | <i>Cyp51a1</i>       | cytochrome P450, family 51, subfamily A, polypeptide 1 (endoplasmic reticulum, lanosterol 14-alpha demethylase); proximal 3' UTR    | Chr5: 4.082591    | 11.9<br>49 | 45 | 14.1 | Chr12: 84.895759 | 0.21<br>7      |
| 110<br>☐ | MA_M2M_0706_R | <a href="#">1457443_at</a>   | <i>Gpatc2</i>        | G patch domain containing 2                                                                                                         | Chr1: 187.239847  | 5.97<br>2  | 45 | 10.0 | Chr2: 79.343444  | 0.03<br>1      |
| 111<br>☐ | MA_M2M_0706_R | <a href="#">1442766_at</a>   | <i>Ppp4r1</i>        | ESTs                                                                                                                                | Chr17: 65.819859  | 7.90<br>0  | 45 | 7.7  | Chr8: 123.289925 | -<br>0.07<br>8 |
| 112<br>☐ | MA_M2M_0706_R | <a href="#">1426290_at</a>   | <i>1500031M22Rik</i> | RIKEN cDNA 1500031M22 gene                                                                                                          | Chr13: 106.952343 | 7.08<br>6  | 45 | 11.0 | Chr9: 105.774381 | 0.05<br>8      |
| 113<br>☐ | MA_M2M_0706_R | <a href="#">1416697_at</a>   | <i>Dpp4</i>          | dipeptidylpeptidase 4; mid 3' UTR                                                                                                   | Chr2: 62.331853   | 10.1<br>57 | 45 | 9.9  | Chr4: 88.045738  | 0.17<br>6      |
| 114<br>☐ | MA_M2M_0706_R | <a href="#">1435290_x_at</a> | <i>H2-Aa</i>         | histocompatibility 2, class II antigen A, alpha                                                                                     | Chr17: 34.282793  | 12.1<br>00 | 45 | 7.4  | Chr16: 27.360729 | -<br>0.37<br>6 |
| 115<br>☐ | MA_M2M_0706_R | <a href="#">1427701_a_at</a> | <i>Six4</i>          | sine oculis-related homeobox 4 homolog (Drosophila)                                                                                 | Chr12: 73.108658  | 6.33<br>5  | 45 | 12.5 | Chr10: 57.752461 | -<br>0.06<br>3 |
| 116<br>☐ | MA_M2M_0706_R | <a href="#">1444801_at</a>   | <i>2900041M22Rik</i> | RIKEN cDNA 2900041M22 gene                                                                                                          | Chr11: 117.613259 | 5.83<br>6  | 45 | 10.6 | Chr10: 55.101486 | -<br>0.03<br>1 |

|                                 |               |                              |                      |                                                                                                                      |                   |        |    |      |                   |        |
|---------------------------------|---------------|------------------------------|----------------------|----------------------------------------------------------------------------------------------------------------------|-------------------|--------|----|------|-------------------|--------|
| 117<br><input type="checkbox"/> | MA_M2M_0706_R | <a href="#">1455013_at</a>   | <i>Arih2</i>         | ariadne RBR E3 ubiquitin protein ligase 2                                                                            | Chr9: 108.603136  | 9.527  | 45 | 14.8 | Chr9: 107.831131  | 0.121  |
| 118<br><input type="checkbox"/> | MA_M2M_0706_R | <a href="#">1444826_at</a>   | <i>4933427D06</i>    | ESTs                                                                                                                 | Chr7: 78.892287   | 6.043  | 45 | 10.5 | Chr8: 127.830308  | 0.053  |
| 119<br><input type="checkbox"/> | MA_M2M_0706_R | <a href="#">1421595_at</a>   | <i>AB041544</i>      | hypothetical protein, MNCb-2622; putative 3' UTR (from EST AB041544)                                                 | Chr17: 83.574143  | 6.111  | 45 | 10.4 | Chr8: 117.545014  | 0.036  |
| 120<br><input type="checkbox"/> | MA_M2M_0706_R | <a href="#">1451449_at</a>   | <i>4933407N01Rik</i> | RIKEN cDNA 4933407N01 gene                                                                                           | Chr11: 30.931644  | 10.554 | 45 | 11.5 | Chr7: 36.693524   | -0.159 |
| 121<br><input type="checkbox"/> | MA_M2M_0706_R | <a href="#">1443870_at</a>   | <i>Abcc4</i>         | ATP-binding cassette, sub-family C (CFTR/MRP), member 4; distal 3' UTR                                               | Chr14: 118.482729 | 8.698  | 45 | 11.2 | Chr13: 50.000000  | 0.218  |
| 122<br><input type="checkbox"/> | MA_M2M_0706_R | <a href="#">1442072_at</a>   | <i>1110049L02Rik</i> | RIKEN cDNA 1110049L02 gene                                                                                           | Chr9: 56.203799   | 6.309  | 45 | 11.7 | Chr16: 10.595499  | -0.055 |
| 123<br><input type="checkbox"/> | MA_M2M_0706_R | <a href="#">1428334_at</a>   | <i>Ostm1</i>         | osteopetrosis associated transmembrane protein 1; distal 3'UTR                                                       | Chr10: 42.701869  | 10.087 | 45 | 15.7 | Chr19: 8.707699   | 0.170  |
| 124<br><input type="checkbox"/> | MA_M2M_0706_R | <a href="#">1447224_at</a>   | <i>Edg5</i>          | endothelial differentiation, sphingolipid G-protein-coupled receptor 5; putative far 3' UTR (possible neighbor gene) | Chr9: 20.962394   | 6.096  | 45 | 10.5 | Chr15: 101.561023 | 0.040  |
| 125<br><input type="checkbox"/> | MA_M2M_0706_R | <a href="#">1418294_at</a>   | <i>Epb4.1/4b</i>     | erythrocyte protein band 4.1-like 4b                                                                                 | Chr4: 57.061849   | 8.437  | 45 | 8.2  | Chr15: 25.698695  | -0.119 |
| 126<br><input type="checkbox"/> | MA_M2M_0706_R | <a href="#">1455980_a_at</a> | <i>8430435B07Rik</i> | ESTs, Weakly similar to GAS2_MOUSE Growth-arrest-specific protein 2 (GAS-2) [M.musculus]                             | Chr10: 89.412598  | 5.951  | 45 | 11.4 | Chr18: 82.255306  | 0.048  |
| 127<br><input type="checkbox"/> | MA_M2M_0706_R | <a href="#">1418605_at</a>   | <i>Nr2c1</i>         | nuclear receptor subfamily 2, group C, member 1; last exon and 3' UTR                                                | Chr10: 94.195174  | 6.877  | 45 | 9.4  | Chr18: 80.000000  | 0.080  |
| 128<br><input type="checkbox"/> | MA_M2M_0706_R | <a href="#">1434649_at</a>   | <i>Ccm2</i>          | cerebral cavernous malformation 2 homolog; last exon and proximal half of 3' UTR                                     | Chr11: 6.596167   | 8.359  | 45 | 12.5 | Chr15: 12.672705  | -0.058 |
| 129<br><input type="checkbox"/> | MA_M2M_0706_R | <a href="#">1458415_at</a>   | <i>Clec2e</i>        | C-type lectin domain family 2, member e                                                                              | Chr6: 146.783700  | 7.753  | 45 | 12.4 | Chr7: 46.356949   | 0.090  |

|     |               |                              |                      |                                                                            |                  |        |    |      |                   |        |
|-----|---------------|------------------------------|----------------------|----------------------------------------------------------------------------|------------------|--------|----|------|-------------------|--------|
| 130 | MA_M2M_0706_R | <a href="#">1427748_at</a>   | <i>Igh-4</i>         | immunoglobulin heavy chain 4 (serum IgG1)                                  | --               | 5.748  | 45 | 13.9 | Chr16: 3.500000   | -0.040 |
| 131 | MA_M2M_0706_R | <a href="#">1415741_at</a>   | <i>Tmem165</i>       | transmembrane protein 165; 3' UTR                                          | Chr5: 76.208683  | 11.195 | 45 | 7.9  | Chr5: 45.290189   | 0.128  |
| 132 | MA_M2M_0706_R | <a href="#">1459554_at</a>   | <i>Otoa</i>          | ESTs, Weakly similar to L1 repeat, Tf subfamily, member 30 [] [M.musculus] | Chr11: 41.313788 | 5.784  | 45 | 10.8 | Chr13: 105.184837 | 0.042  |
| 133 | MA_M2M_0706_R | <a href="#">1445038_at</a>   | <i>C730043O17</i>    | hypothetical protein C730043O17                                            | Chr18: 35.876721 | 7.222  | 45 | 13.9 | ChrX: 9.334336    | -0.047 |
| 134 | MA_M2M_0706_R | <a href="#">1422775_at</a>   | <i>Blk</i>           | B lymphoid kinase (oncogene); last exon and proximal half of 3' UTR        | Chr14: 63.373004 | 6.880  | 45 | 9.3  | Chr9: 98.579310   | -0.068 |
| 135 | MA_M2M_0706_R | <a href="#">1451408_at</a>   | <i>Trub2</i>         | TruB pseudouridine (psi) synthase homolog 2 (E. coli); proximal 3' UTR     | Chr2: 29.777041  | 8.272  | 45 | 11.2 | Chr17: 57.106511  | 0.066  |
| 136 | MA_M2M_0706_R | <a href="#">1423527_at</a>   | <i>4921510H08Rik</i> | RIKEN cDNA 4921510H08 gene                                                 | Chr10: 97.694208 | 5.788  | 45 | 11.1 | Chr19: 32.357503  | -0.040 |
| 137 | MA_M2M_0706_R | <a href="#">1425776_a_at</a> | <i>C87436</i>        | expressed sequence C87436                                                  | Chr6: 86.469778  | 7.815  | 45 | 10.8 | Chr9: 115.524788  | 0.097  |
| 138 | MA_M2M_0706_R | <a href="#">1430992_s_at</a> | <i>Cisd2</i>         | CDGSH iron sulfur domain 2                                                 | Chr3: 135.407040 | 7.742  | 45 | 6.7  | Chr8: 126.582424  | 0.129  |
| 139 | MA_M2M_0706_R | <a href="#">1428164_at</a>   | <i>Nudt9</i>         | nudix (nucleoside diphosphate linked moiety X)-type motif 9                | Chr5: 104.061732 | 10.994 | 45 | 10.7 | Chr15: 25.732086  | -0.128 |
| 140 | MA_M2M_0706_R | <a href="#">1451440_at</a>   | <i>Chodl</i>         | chondrolectin                                                              | Chr16: 78.951211 | 6.772  | 45 | 10.1 | Chr9: 29.939029   | 0.083  |
| 141 | MA_M2M_0706_R | <a href="#">1423767_at</a>   | <i>Aip1</i>          | A interacting protein 1; last three exons and proximal 3' UTR              | Chr17: 74.299611 | 10.838 | 45 | 11.3 | Chr9: 107.639250  | 0.110  |
| 142 | MA_M2M_0706_R | <a href="#">1438858_x_at</a> | <i>H2-Aa</i>         | histocompatibility 2, class II antigen A, alpha                            | Chr17: 34.282770 | 11.943 | 45 | 10.3 | Chr2: 134.519309  | -0.314 |
| 143 | MA_M2M_0706_R | <a href="#">1446111_at</a>   | <i>D14Ert611e</i>    | DNA segment, Chr 14, ERATO Doi 611, expressed                              | Chr14: 93.948174 | 5.980  | 45 | 12.5 | Chr5: 118.917989  | -0.042 |
| 144 | MA_M2M_0706_R | <a href="#">1436038_a_at</a> | <i>Dscr5</i>         | Down syndrome critical region homolog 5 (human)                            | Chr16: 94.364735 | 11.777 | 45 | 14.2 | Chr12: 107.923472 | 0.128  |
| 145 | MA_M2M_0706_R | <a href="#">1430490_at</a>   | <i>Tcfap2a</i>       | transcription factor AP-2, alpha; antisense in 5' UTR (from AK017409)      | Chr13: 40.734609 | 6.173  | 45 | 8.8  | Chr4: 88.807538   | 0.045  |

|                                 |               |                              |                      |                                                                                |                   |        |    |      |                   |        |
|---------------------------------|---------------|------------------------------|----------------------|--------------------------------------------------------------------------------|-------------------|--------|----|------|-------------------|--------|
| 146<br><input type="checkbox"/> | MA_M2M_0706_R | <a href="#">1431297_a_at</a> | <i>Crnde</i>         | colorectal neoplasia differentially expressed (non-protein coding)             | Chr8: 92.326387   | 6.501  | 45 | 18.7 | Chr18: 78.806816  | -0.079 |
| 147<br><input type="checkbox"/> | MA_M2M_0706_R | <a href="#">1429390_at</a>   | <i>Acpl2</i>         | acid phosphatase-like 2                                                        | Chr9: 96.823644   | 7.330  | 45 | 9.1  | Chr18: 78.806816  | 0.124  |
| 148<br><input type="checkbox"/> | MA_M2M_0706_R | <a href="#">1453149_at</a>   | <i>Mftc</i>          | major facilitator superfamily domain containing 1                              | Chr15: 39.095072  | 7.004  | 45 | 9.9  | Chr9: 95.329897   | 0.085  |
| 149<br><input type="checkbox"/> | MA_M2M_0706_R | <a href="#">1459271_at</a>   | <i>Cetn2</i>         | centrin 2                                                                      | ChrX: 72.911975   | 6.607  | 45 | 11.9 | Chr18: 78.806816  | -0.063 |
| 150<br><input type="checkbox"/> | MA_M2M_0706_R | <a href="#">1451296_x_at</a> | <i>Pabpc4</i>        | poly A binding protein, cytoplasmic 4; last exon and 3' UTR                    | Chr4: 123.297871  | 9.987  | 45 | 12.6 | Chr17: 21.686210  | 0.101  |
| 151<br><input type="checkbox"/> | MA_M2M_0706_R | <a href="#">1428812_at</a>   | <i>1700040L02Rik</i> | RIKEN cDNA 1700040L02 gene                                                     | Chr10: 68.431234  | 7.569  | 45 | 12.7 | Chr13: 101.209232 | 0.151  |
| 152<br><input type="checkbox"/> | MA_M2M_0706_R | <a href="#">1417559_at</a>   | <i>Sfxn1</i>         | sideroflexin 1 (flexed tail, tricarboxylate carrier protein, iron homeostasis) | Chr13: 54.093053  | 12.597 | 45 | 7.7  | Chr18: 76.826488  | 0.184  |
| 153<br><input type="checkbox"/> | MA_M2M_0706_R | <a href="#">1449047_at</a>   | <i>1600020H07Rik</i> | RIKEN cDNA 1600020H07 gene                                                     | Chr14: 31.615360  | 9.381  | 45 | 16.7 | Chr7: 6.677334    | 0.378  |
| 154<br><input type="checkbox"/> | MA_M2M_0706_R | <a href="#">1452423_at</a>   | <i>Pclo</i>          | piccolo (presynaptic cytomatrix protein); last three exons and proximal 3' UTR | Chr5: 14.855613   | 5.643  | 45 | 19.3 | Chr5: 141.387458  | -0.045 |
| 155<br><input type="checkbox"/> | MA_M2M_0706_R | <a href="#">1452237_at</a>   | <i>Hrb</i>           | HIV-1 Rev binding protein; mid-distal 3' UTR                                   | Chr1: 82.895811   | 7.792  | 45 | 11.6 | Chr18: 80.000000  | 0.206  |
| 156<br><input type="checkbox"/> | MA_M2M_0706_R | <a href="#">1452937_s_at</a> | <i>Ccdc28b</i>       | coiled coil domain containing 28B; exon                                        | Chr4: 129.620698  | 7.524  | 45 | 15.8 | Chr19: 35.573941  | -0.123 |
| 157<br><input type="checkbox"/> | MA_M2M_0706_R | <a href="#">1443042_at</a>   | <i>D130047N11Rik</i> | RIKEN cDNA D130047N11 gene                                                     | Chr16: 72.817619  | 6.795  | 45 | 11.7 | Chr9: 95.329897   | -0.066 |
| 158<br><input type="checkbox"/> | MA_M2M_0706_R | <a href="#">1428213_at</a>   | <i>2410003A14Rik</i> | RIKEN cDNA 2410003A14 gene                                                     | Chr7: 130.533576  | 11.436 | 45 | 15.4 | Chr4: 88.045738   | 0.114  |
| 159<br><input type="checkbox"/> | MA_M2M_0706_R | <a href="#">1448883_at</a>   | <i>Lgmn</i>          | legumain cysteine protease; last two exons and proximal 3' UTR                 | Chr12: 102.394497 | 13.431 | 45 | 10.4 | Chr15: 91.405127  | 0.186  |
| 160<br><input type="checkbox"/> | MA_M2M_0706_R | <a href="#">1450759_at</a>   | <i>Bmp6</i>          | bone morphogenetic protein 6                                                   | Chr13: 38.499601  | 10.572 | 45 | 12.3 | Chr2: 149.665875  | -0.199 |
| 161<br><input type="checkbox"/> | MA_M2M_0706_R | <a href="#">1431008_at</a>   | <i>H2-Q1</i>         | histocompatibility 2, Q region locus 1                                         | Chr17: 35.384916  | 10.084 | 45 | 21.0 | Chr13: 110.449360 | -0.462 |

|          |               |                              |                      |                                                                                                              |                   |        |    |      |                   |        |
|----------|---------------|------------------------------|----------------------|--------------------------------------------------------------------------------------------------------------|-------------------|--------|----|------|-------------------|--------|
| 162<br>☐ | MA_M2M_0706_R | <a href="#">1425868_at</a>   | <i>Hist2h2bb</i>     | histone cluster 2, H2bb; far 3' UTR (long form)                                                              | Chr3: 96.278524   | 6.564  | 45 | 13.8 | Chr18: 78.806816  | 0.058  |
| 163<br>☐ | MA_M2M_0706_R | <a href="#">1452200_at</a>   | <i>Cdkn2aipnl</i>    | CDKN2A interacting protein N-terminal like; mid distal 3' UTR                                                | Chr11: 51.976754  | 8.617  | 45 | 11.9 | Chr13: 111.021029 | 0.126  |
| 164<br>☐ | MA_M2M_0706_R | <a href="#">1416963_at</a>   | <i>Ubadc1</i>        | ubiquitin associated domain containing 1                                                                     | Chr2: 25.998617   | 10.703 | 45 | 16.0 | Chr12: 86.105698  | 0.138  |
| 165<br>☐ | MA_M2M_0706_R | <a href="#">1451125_at</a>   | <i>Paip2b</i>        | poly(A) binding protein interacting protein 2B; distal 3' UTR                                                | Chr6: 83.806140   | 8.694  | 45 | 11.2 | Chr12: 117.389926 | -0.128 |
| 166<br>☐ | MA_M2M_0706_R | <a href="#">1430794_at</a>   | <i>4933426K07Rik</i> | RIKEN cDNA 4933426K07 gene                                                                                   | Chr11: 57.655491  | 7.035  | 45 | 10.6 | Chr16: 26.422169  | 0.070  |
| 167<br>☐ | MA_M2M_0706_R | <a href="#">1452246_at</a>   | <i>Ostf1</i>         | osteoclast stimulating factor 1                                                                              | Chr19: 18.584675  | 10.691 | 45 | 28.3 | Chr19: 18.172211  | 0.253  |
| 168<br>☐ | MA_M2M_0706_R | <a href="#">1437151_at</a>   | <i>Usp22</i>         | ubiquitin specific protease 22                                                                               | Chr11: 61.152155  | 10.093 | 45 | 16.3 | Chr19: 28.403278  | -0.126 |
| 169<br>☐ | MA_M2M_0706_R | <a href="#">1427699_a_at</a> | <i>Ptpn11</i>        | protein tyrosine phosphatase, non-receptor type 11                                                           | Chr5: 121.143016  | 7.744  | 45 | 10.3 | Chr7: 26.713260   | 0.089  |
| 170<br>☐ | MA_M2M_0706_R | <a href="#">1444048_at</a>   | <i>AI666576</i>      | ESTs                                                                                                         | Chr9: 22.440388   | 7.059  | 45 | 12.6 | Chr13: 110.449360 | -0.064 |
| 171<br>☐ | MA_M2M_0706_R | <a href="#">1450192_at</a>   | <i>Lhcgr</i>         | luteinizing hormone/choriogonadotropin receptor                                                              | Chr17: 88.741574  | 5.952  | 45 | 10.4 | Chr4: 86.450967   | -0.033 |
| 172<br>☐ | MA_M2M_0706_R | <a href="#">1417616_at</a>   | <i>St6galnac2</i>    | ST6 (alpha-N-acetylneuraminyl-2,3-beta-galactosyl-1,3)-N-acetylgalactosaminide alpha-2,6-sialyltransferase 2 | Chr11: 116.676736 | 11.572 | 45 | 10.4 | Chr1: 3.010274    | 0.116  |
| 173<br>☐ | MA_M2M_0706_R | <a href="#">1417935_at</a>   | <i>Mkrn2</i>         | makorin, ring finger protein, 2                                                                              | Chr6: 115.618089  | 9.496  | 45 | 9.9  | Chr5: 117.789650  | -0.119 |
| 174<br>☐ | MA_M2M_0706_R | <a href="#">1454694_a_at</a> | <i>Top2a</i>         | topoisomerase (DNA) II alpha; last exons and 3' UTR                                                          | Chr11: 98.993073  | 6.912  | 45 | 9.1  | Chr9: 3.400000    | -0.131 |
| 175<br>☐ | MA_M2M_0706_R | <a href="#">1416029_at</a>   | <i>Tieg1</i>         | TGFB inducible early growth response 1; distal 3' UTR                                                        | Chr15: 38.294544  | 7.459  | 45 | 9.6  | Chr19: 44.599198  | -0.172 |
| 176<br>☐ | MA_M2M_0706_R | <a href="#">1424607_a_at</a> | <i>LOC432823</i>     | endogenous retroviral sequence MGC37588; repetitive element                                                  | ChrUn: 1.000000   | 11.045 | 45 | 11.9 | Chr3: 41.542098   | 0.269  |
| 177<br>☐ | MA_M2M_0706_R | <a href="#">1451005_at</a>   | <i>Sumo1</i>         | small ubiquitin-like modifier 1 (SMT3 suppressor of mif two 3 homolog 1);                                    | Chr1: 59.639734   | 12.000 | 45 | 11.6 | Chr5: 127.617133  | 0.112  |



|          |               |                              |                      |                                                                                                                  |                   |        |    |      |                   |        |
|----------|---------------|------------------------------|----------------------|------------------------------------------------------------------------------------------------------------------|-------------------|--------|----|------|-------------------|--------|
|          |               |                              |                      | proximal and mid 3' UTR                                                                                          |                   |        |    |      |                   |        |
| 178<br>☐ | MA_M2M_0706_R | <a href="#">1452134_at</a>   | <i>Tmem175</i>       | transmembrane protein 175; last exon and proximal 3' UTR                                                         | Chr5: 108.646099  | 8.506  | 45 | 10.1 | Chr18: 78.806816  | 0.118  |
| 179<br>☐ | MA_M2M_0706_R | <a href="#">1415753_at</a>   | <i>Fam108a</i>       | abhydrolase domain-containing protein FAM108A; last two exons and proximal 3' UTR                                | Chr10: 80.583725  | 11.533 | 45 | 7.1  | Chr17: 10.720847  | -0.122 |
| 180<br>☐ | MA_M2M_0706_R | <a href="#">1451825_a_at</a> | <i>Copz1</i>         | coatamer protein complex, subunit zeta 1                                                                         | Chr15: 103.299251 | 11.799 | 45 | 12.5 | Chr12: 36.689834  | 0.086  |
| 181<br>☐ | MA_M2M_0706_R | <a href="#">1434771_at</a>   | <i>0610011F06Rik</i> | RIKEN cDNA 0610011F06 gene                                                                                       | Chr17: 25.876764  | 12.779 | 45 | 13.8 | Chr18: 15.638699  | -0.117 |
| 182<br>☐ | MA_M2M_0706_R | <a href="#">1436657_at</a>   | <i>Prcd</i>          | progressive rod-cone degeneration (pineal and retinal photoreceptor associated); exon and 3' UTR (from AK137302) | Chr11: 116.657560 | 7.849  | 45 | 8.5  | Chr7: 114.699004  | 0.059  |
| 183<br>☐ | MA_M2M_0706_R | <a href="#">1416030_a_at</a> | <i>Mcm7</i>          | minichromosome maintenance deficient 7 (S. cerevisiae)                                                           | Chr5: 138.165990  | 9.862  | 45 | 14.6 | Chr12: 9.742519   | 0.168  |
| 184<br>☐ | MA_M2M_0706_R | <a href="#">1424003_at</a>   | <i>Sgk196</i>        | protein kinase-like protein Sugen kinase 196; mid 3' UTR                                                         | Chr8: 25.981541   | 6.593  | 45 | 14.4 | Chr1: 107.486168  | 0.058  |
| 185<br>☐ | MA_M2M_0706_R | <a href="#">1435628_x_at</a> | <i>A430108B07Rik</i> | RIKEN cDNA A430108B07 gene                                                                                       | Chr10: 25.895642  | 7.881  | 45 | 14.3 | Chr14: 117.841013 | -0.216 |
| 186<br>☐ | MA_M2M_0706_R | <a href="#">1421776_at</a>   | <i>Olfir74</i>       | olfactory receptor 74; exon                                                                                      | Chr2: 87.973725   | 5.988  | 45 | 13.6 | Chr13: 103.151983 | 0.070  |
| 187<br>☐ | MA_M2M_0706_R | <a href="#">1417594_at</a>   | <i>Gkap1</i>         | G kinase anchoring protein 1; last 5 exons and 3' UTR                                                            | Chr13: 58.233391  | 11.023 | 45 | 14.8 | Chr4: 62.707256   | 0.162  |
| 188<br>☐ | MA_M2M_0706_R | <a href="#">1418629_a_at</a> | <i>Khdrbs1</i>       | KH domain containing, RNA binding, signal transduction associated 1; mid distal 3' UTR                           | Chr4: 129.715175  | 9.678  | 45 | 10.7 | Chr18: 15.747404  | 0.126  |
| 189<br>☐ | MA_M2M_0706_R | <a href="#">1424128_x_at</a> | <i>Aurkb</i>         | aurora kinase B; mid 3' UTR                                                                                      | Chr11: 69.051092  | 6.399  | 45 | 17.0 | Chr17: 63.598705  | 0.046  |
| 190<br>☐ | MA_M2M_0706_R | <a href="#">1430617_at</a>   | <i>5730547N13Rik</i> | RIKEN cDNA 5730547N13 gene                                                                                       | Chr2: 119.609857  | 6.428  | 45 | 8.3  | Chr9: 103.625467  | 0.034  |
| 191<br>☐ | MA_M2M_0706_R | <a href="#">1448429_at</a>   | <i>Gyg1</i>          | glycogenin 1; proximal to mid 3' UTR                                                                             | Chr3: 20.122324   | 10.175 | 45 | 11.3 | Chr9: 107.639250  | 0.100  |

|                                 |               |                              |                   |                                                                                                                    |                   |        |    |      |                  |        |
|---------------------------------|---------------|------------------------------|-------------------|--------------------------------------------------------------------------------------------------------------------|-------------------|--------|----|------|------------------|--------|
| 192<br><input type="checkbox"/> | MA_M2M_0706_R | <a href="#">1428803_at</a>   | <i>Acot6</i>      | acyl-coenzyme A thioesterase 6                                                                                     | Chr12: 84.110781  | 7.725  | 45 | 9.7  | ChrX: 37.500000  | 0.103  |
| 193<br><input type="checkbox"/> | MA_M2M_0706_R | <a href="#">1448200_at</a>   | <i>Tcn2</i>       | transcobalamin 2; last 2 exons and 3' UTR                                                                          | Chr11: 3.917372   | 16.251 | 45 | 15.8 | Chr15: 91.405127 | 0.127  |
| 194<br><input type="checkbox"/> | MA_M2M_0706_R | <a href="#">1429556_at</a>   | <i>Tead1</i>      | TEA domain family member 1 (SV40 transcriptional enhancer factor, Sveinsson's chorioretinal atrophy); distal 3'UTR | Chr7: 112.905932  | 10.670 | 45 | 11.0 | Chr15: 94.266750 | -0.156 |
| 195<br><input type="checkbox"/> | MA_M2M_0706_R | <a href="#">1449067_at</a>   | <i>Slc2a2</i>     | solute carrier family 2 (facilitated glucose transporter), member 2; distal 3' UTR                                 | Chr3: 28.727844   | 13.426 | 45 | 13.1 | Chr17: 21.686210 | 0.282  |
| 196<br><input type="checkbox"/> | MA_M2M_0706_R | <a href="#">1452582_at</a>   | <i>Galm</i>       | galactose mutarotase; mid 3' UTR                                                                                   | Chr17: 80.184508  | 12.125 | 45 | 12.1 | ChrX: 114.159505 | 0.125  |
| 197<br><input type="checkbox"/> | MA_M2M_0706_R | <a href="#">1418517_at</a>   | <i>Irx3</i>       | Iroquois related homeobox 3                                                                                        | Chr8: 91.798530   | 11.401 | 45 | 8.5  | Chr18: 16.414681 | -0.151 |
| 198<br><input type="checkbox"/> | MA_M2M_0706_R | <a href="#">1416901_at</a>   | <i>Npc2</i>       | Niemann Pick type C2; proximal 3' UTR                                                                              | Chr12: 84.756822  | 12.119 | 45 | 11.1 | ChrX: 114.159505 | 0.083  |
| 199<br><input type="checkbox"/> | MA_M2M_0706_R | <a href="#">1460575_at</a>   | <i>D3Ertd194e</i> | DNA segment, Chr 3, ERATO Doi 194, expressed                                                                       | Chr3: 58.555538   | 8.811  | 45 | 12.5 | Chr15: 95.949674 | 0.123  |
| 200<br><input type="checkbox"/> | MA_M2M_0706_R | <a href="#">1456130_at</a>   | <i>Pcdh7</i>      | protocadherin 7                                                                                                    | Chr6: 12.311625   | 6.255  | 45 | 14.4 | Chr15: 93.021696 | -0.103 |
| 201<br><input type="checkbox"/> | MA_M2M_0706_R | <a href="#">1423068_at</a>   | <i>Ift172</i>     | intraflagellar transport 172 protein; 4 of last 5 exons and proximal 3' UTR                                        | Chr5: 31.253314   | 9.056  | 45 | 12.5 | Chr10: 13.687795 | -0.138 |
| 202<br><input type="checkbox"/> | MA_M2M_0706_R | <a href="#">1460221_at</a>   | <i>Ptges3</i>     | prostaglandin E synthase 3 (cytosolic); mid-proximal 3' UTR                                                        | Chr10: 128.076319 | 12.499 | 45 | 11.2 | Chr15: 94.266750 | -0.201 |
| 203<br><input type="checkbox"/> | MA_M2M_0706_R | <a href="#">1426990_at</a>   | <i>Cubn</i>       | cubilin (intrinsic factor-cobalamin receptor)                                                                      | Chr2: 13.278386   | 13.765 | 45 | 17.9 | ChrX: 102.126656 | 0.214  |
| 204<br><input type="checkbox"/> | MA_M2M_0706_R | <a href="#">1420618_at</a>   | <i>Cpeb4</i>      | cytoplasmic polyadenylation element binding protein 4; distal 3' UTR                                               | Chr11: 31.935120  | 13.126 | 45 | 10.1 | Chr3: 113.087963 | 0.187  |
| 205<br><input type="checkbox"/> | MA_M2M_0706_R | <a href="#">1427705_a_at</a> | <i>Nfkb1</i>      | nuclear factor of kappa light chain gene enhancer in B-cells 1, p105; mid proximal 3' UTR                          | Chr3: 135.584947  | 9.357  | 45 | 14.9 | Chr1: 178.156680 | 0.085  |

|                                 |               |                              |                      |                                                                                      |                   |            |    |      |                  |            |
|---------------------------------|---------------|------------------------------|----------------------|--------------------------------------------------------------------------------------|-------------------|------------|----|------|------------------|------------|
| 206<br><input type="checkbox"/> | MA_M2M_0706_R | <a href="#">1438718_at</a>   | <i>Fgf9</i>          | fibroblast growth factor 9; distal half of 3' UTR                                    | Chr14: 58.109862  | 7.58<br>4  | 45 | 9.4  | ChrX: 102.126656 | -<br>0.129 |
| 207<br><input type="checkbox"/> | MA_M2M_0706_R | <a href="#">1425020_at</a>   | <i>Ubx2a</i>         | UBX domain protein 2A (p97 adaptor protein); far 3' UTR                              | Chr12: 4.877133   | 13.1<br>42 | 45 | 16.4 | Chr11: 62.251912 | 0.118      |
| 208<br><input type="checkbox"/> | MA_M2M_0706_R | <a href="#">1438221_at</a>   | <i>C130065N10Rik</i> | RIKEN cDNA C130065N10 gene                                                           | Chr1: 58.522945   | 9.70<br>8  | 45 | 18.7 | Chr1: 58.115573  | -<br>0.239 |
| 209<br><input type="checkbox"/> | MA_M2M_0706_R | <a href="#">1422441_x_at</a> | <i>Cdk4</i>          | cyclin-dependent kinase 4; last two exons and proximal 3' UTR                        | Chr10: 127.066179 | 10.2<br>75 | 45 | 17.7 | Chr13: 53.477510 | 0.158      |
| 210<br><input type="checkbox"/> | MA_M2M_0706_R | <a href="#">1460406_at</a>   | <i>Trpc1</i>         | transient receptor potential cation channel, subfamily C, member 1                   | Chr9: 95.752943   | 11.1<br>06 | 45 | 9.8  | Chr11: 99.734855 | 0.134      |
| 211<br><input type="checkbox"/> | MA_M2M_0706_R | <a href="#">1453623_a_at</a> | <i>Rad23a</i>        | RAD23a homolog (S. cerevisiae)                                                       | Chr8: 84.840492   | 7.92<br>2  | 45 | 12.4 | Chr8: 80.868085  | 0.239      |
| 212<br><input type="checkbox"/> | MA_M2M_0706_R | <a href="#">1454609_x_at</a> | <i>6430527G18Rik</i> | RIKEN cDNA 6430527G18 gene                                                           | Chr12: 86.881028  | 9.63<br>3  | 45 | 8.5  | Chr13: 53.477510 | -<br>0.112 |
| 213<br><input type="checkbox"/> | MA_M2M_0706_R | <a href="#">1438937_x_at</a> | <i>Ang</i>           | angiogenin, ribonuclease A family, member 1; last (only) exon and proximal 3' UTR    | Chr14: 51.101813  | 6.46<br>9  | 45 | 10.8 | Chr18: 76.870082 | 0.177      |
| 214<br><input type="checkbox"/> | MA_M2M_0706_R | <a href="#">1433722_at</a>   | <i>5730522G15Rik</i> | RIKEN cDNA 5730522G15 gene                                                           | Chr7: 75.754024   | 10.4<br>60 | 45 | 7.6  | Chr4: 40.731591  | 0.112      |
| 215<br><input type="checkbox"/> | MA_M2M_0706_R | <a href="#">1426656_at</a>   | <i>4930504E06Rik</i> | RIKEN cDNA 4930504E06 gene                                                           | Chr3: 95.295369   | 11.2<br>32 | 45 | 15.5 | Chr7: 31.360167  | -<br>0.131 |
| 216<br><input type="checkbox"/> | MA_M2M_0706_R | <a href="#">1453851_a_at</a> | <i>Gadd45g</i>       | growth arrest and DNA-damage-inducible 45 gamma                                      | Chr13: 51.847877  | 9.35<br>6  | 45 | 13.0 | Chr5: 77.779809  | -<br>0.305 |
| 217<br><input type="checkbox"/> | MA_M2M_0706_R | <a href="#">1423809_at</a>   | <i>Tcf19</i>         | transcription factor 19                                                              | Chr17: 35.512810  | 7.75<br>2  | 45 | 20.9 | Chr9: 3.400000   | -<br>0.102 |
| 218<br><input type="checkbox"/> | MA_M2M_0706_R | <a href="#">1452148_at</a>   | <i>Lrpap1</i>        | low density lipoprotein receptor-related protein associated protein 1; distal 3' UTR | Chr5: 35.091531   | 11.4<br>08 | 45 | 14.0 | Chr2: 80.327515  | -<br>0.154 |
| 219<br><input type="checkbox"/> | MA_M2M_0706_R | <a href="#">1433622_at</a>   | <i>Gemin4</i>        | gem (nuclear organelle) associated protein 4                                         | Chr11: 76.210878  | 7.86<br>6  | 45 | 10.1 | Chr7: 3.078244   | -<br>0.097 |
| 220<br><input type="checkbox"/> | MA_M2M_0706_R | <a href="#">1440037_at</a>   | <i>Pbx1</i>          | pre B-cell leukemia transcription factor 1; 3' UTR of short form message (intron 2)  | Chr1: 168.424573  | 10.5<br>78 | 45 | 13.7 | Chr3: 27.192039  | 0.282      |

|                                 |               |                              |                      |                                                                                                                                                   |                  |            |    |      |                   |            |
|---------------------------------|---------------|------------------------------|----------------------|---------------------------------------------------------------------------------------------------------------------------------------------------|------------------|------------|----|------|-------------------|------------|
| 221<br><input type="checkbox"/> | MA_M2M_0706_R | <a href="#">1451276_at</a>   | <i>Uhrf1bp1l</i>     | UHRF1 (ICBP90) binding protein 1-like                                                                                                             | Chr10: 89.819273 | 10.9<br>26 | 45 | 7.9  | Chr2: 109.782694  | -<br>0.116 |
| 222<br><input type="checkbox"/> | MA_M2M_0706_R | <a href="#">1434701_at</a>   | <i>Alkbh5</i>        | alkB, alkylation repair homolog 5; distal 3' UTR                                                                                                  | Chr11: 60.557920 | 12.3<br>96 | 45 | 9.9  | Chr18: 82.106750  | -<br>0.119 |
| 223<br><input type="checkbox"/> | MA_M2M_0706_R | <a href="#">1437117_at</a>   | <i>Centb1</i>        | centaurin, beta 1                                                                                                                                 | Chr11: 69.882381 | 8.48<br>3  | 45 | 11.2 | Chr15: 62.238376  | 0.09<br>2  |
| 224<br><input type="checkbox"/> | MA_M2M_0706_R | <a href="#">1418146_a_at</a> | <i>Rbl2</i>          | retinoblastoma-like 2; proximal and mid 3' UTR                                                                                                    | Chr8: 91.122460  | 9.16<br>2  | 45 | 13.4 | Chr18: 76.826488  | 0.19<br>1  |
| 225<br><input type="checkbox"/> | MA_M2M_0706_R | <a href="#">1423643_at</a>   | <i>Ddx39</i>         | DEAD (Asp-Glu-Ala-Asp) box polypeptide 39                                                                                                         | Chr8: 83.722458  | 9.36<br>1  | 45 | 13.2 | Chr15: 7.167980   | -<br>0.174 |
| 226<br><input type="checkbox"/> | MA_M2M_0706_R | <a href="#">1457949_at</a>   | <i>Nt5c2</i>         | 5'-nucleotidase, cytosolic II; putative exon                                                                                                      | Chr19: 46.885497 | 7.83<br>7  | 45 | 20.5 | Chr11: 62.251912  | -<br>0.122 |
| 227<br><input type="checkbox"/> | MA_M2M_0706_R | <a href="#">1421631_at</a>   | <i>Pcdhb1</i>        | protocadherin beta 1                                                                                                                              | Chr18: 37.266924 | 6.48<br>4  | 45 | 9.1  | Chr13: 108.957958 | 0.04<br>8  |
| 228<br><input type="checkbox"/> | MA_M2M_0706_R | <a href="#">1441208_at</a>   | <i>Hdhd2</i>         | haloacid dehalogenase-like hydrolase domain containing; putative deep 3' UTR                                                                      | Chr18: 76.973281 | 8.22<br>8  | 45 | 13.8 | Chr11: 73.268056  | -<br>0.101 |
| 229<br><input type="checkbox"/> | MA_M2M_0706_R | <a href="#">1449481_at</a>   | <i>Slc25a13</i>      | solute carrier family 25 (mitochondrial carrier, adenine nucleotide translocator), member 13 (citric deficiency associated)                       | Chr6: 6.041795   | 11.8<br>36 | 45 | 18.1 | Chr6: 23.242013   | 0.19<br>2  |
| 230<br><input type="checkbox"/> | MA_M2M_0706_R | <a href="#">1435860_at</a>   | <i>Slc5a6</i>        | solute carrier family 5 (sodium-dependent vitamin transporter), member 6                                                                          | Chr5: 31.036558  | 8.13<br>5  | 45 | 9.3  | Chr8: 127.830308  | 0.17<br>2  |
| 231<br><input type="checkbox"/> | MA_M2M_0706_R | <a href="#">1434748_at</a>   | <i>Ckap2</i>         | cytoskeleton associated protein 2                                                                                                                 | Chr8: 22.168836  | 6.85<br>6  | 45 | 11.9 | Chr15: 7.167980   | -<br>0.061 |
| 232<br><input type="checkbox"/> | MA_M2M_0706_R | <a href="#">1455939_x_at</a> | <i>Srp14</i>         | signal recognition particle 14                                                                                                                    | Chr2: 118.475915 | 12.3<br>18 | 45 | 7.4  | Chr2: 109.782694  | 0.13<br>8  |
| 233<br><input type="checkbox"/> | MA_M2M_0706_R | <a href="#">1415917_at</a>   | <i>Mthfd1</i>        | methylenetetrahydrofolate dehydrogenase (NADP+ dependent), methenyltetrahydrofolate cyclohydrolase, formyltetrahydrofolate synthase; last 3 exons | Chr12: 76.314424 | 12.8<br>92 | 45 | 11.4 | Chr7: 73.746984   | 0.09<br>8  |
| 234<br><input type="checkbox"/> | MA_M2M_0706_R | <a href="#">1436583_at</a>   | <i>2600005O03Rik</i> | RIKEN cDNA 2600005O03 gene                                                                                                                        | Chr15: 75.538760 | 5.99<br>4  | 45 | 11.1 | Chr2: 109.782694  | 0.04<br>0  |

|          |               |                              |                      |                                                                                                                                                                                              |                   |            |    |      |                   |                |
|----------|---------------|------------------------------|----------------------|----------------------------------------------------------------------------------------------------------------------------------------------------------------------------------------------|-------------------|------------|----|------|-------------------|----------------|
| 235<br>☐ | MA_M2M_0706_R | <a href="#">1416644_a_at</a> | <i>Sema3b</i>        | sema domain, immunoglobulin domain (Ig), short basic domain, secreted, (semaphorin) 3B; exons 12 through 16                                                                                  | Chr9: 107.599602  | 8.65<br>4  | 45 | 10.3 | ChrX: 47.876769   | 0.10<br>5      |
| 236<br>☐ | MA_M2M_0706_R | <a href="#">1433159_at</a>   | <i>5330429L19Rik</i> | RIKEN cDNA 5330429L19 gene                                                                                                                                                                   | Chr14: 64.653515  | 6.79<br>8  | 45 | 8.7  | Chr13: 106.343092 | -<br>0.07<br>0 |
| 237<br>☐ | MA_M2M_0706_R | <a href="#">1450777_at</a>   | <i>Xrn2</i>          | 5'-3' exoribonuclease 2; exons 22, 23, 24, and 25                                                                                                                                            | Chr2: 147.061459  | 8.90<br>7  | 45 | 17.0 | Chr15: 93.021696  | 0.13<br>7      |
| 238<br>☐ | MA_M2M_0706_R | <a href="#">1456878_at</a>   | <i>AI646023</i>      | expressed sequence AI646023                                                                                                                                                                  | Chr10: 75.550162  | 6.31<br>9  | 45 | 12.0 | Chr15: 67.990415  | 0.06<br>5      |
| 239<br>☐ | MA_M2M_0706_R | <a href="#">1426593_a_at</a> | <i>Fbxo22</i>        | F-box only protein 22                                                                                                                                                                        | Chr9: 55.224277   | 12.5<br>90 | 45 | 11.6 | Chr11: 62.251912  | 0.12<br>3      |
| 240<br>☐ | MA_M2M_0706_R | <a href="#">1425025_at</a>   | <i>Tmem106a</i>      | transmembrane protein 106A; last two exons and proximal 3' UTR                                                                                                                               | Chr11: 101.589980 | 12.2<br>94 | 45 | 14.4 | Chr15: 93.021696  | 0.20<br>0      |
| 241<br>☐ | MA_M2M_0706_R | <a href="#">1442397_at</a>   | <i>Nfx1</i>          | nuclear transcription factor, X-box binding 1                                                                                                                                                | Chr4: 41.013293   | 7.41<br>3  | 45 | 14.3 | Chr15: 94.266750  | 0.08<br>0      |
| 242<br>☐ | MA_M2M_0706_R | <a href="#">1439364_a_at</a> | <i>Mmp2</i>          | matrix metalloproteinase 2; mid distal 3' UTR                                                                                                                                                | Chr8: 92.853173   | 7.74<br>1  | 45 | 19.8 | Chr8: 90.648338   | 0.15<br>8      |
| 243<br>☐ | MA_M2M_0706_R | <a href="#">1437267_x_at</a> | <i>Hnrnph1</i>       | heterogeneous nuclear ribonucleoprotein H1; distal 3' UTR                                                                                                                                    | Chr11: 50.386367  | 7.91<br>5  | 45 | 9.6  | ChrX: 42.224690   | -<br>0.09<br>2 |
| 244<br>☐ | MA_M2M_0706_R | <a href="#">1423050_s_at</a> | <i>Hnrnpu</i>        | heterogeneous nuclear ribonucleoprotein U; distal 3' UTR                                                                                                                                     | Chr1: 178.328459  | 12.6<br>39 | 45 | 9.0  | Chr4: 45.489430   | 0.10<br>8      |
| 245<br>☐ | MA_M2M_0706_R | <a href="#">1451108_at</a>   | <i>Rnf185</i>        | ring finger protein 185                                                                                                                                                                      | Chr11: 3.416211   | 9.87<br>4  | 45 | 10.4 | Chr18: 78.806816  | 0.11<br>6      |
| 246<br>☐ | MA_M2M_0706_R | <a href="#">1459092_at</a>   | <i>Slco6c1</i>       | Mus musculus transcribed sequence with weak similarity to protein sp:Q9Y6L6 (H.sapiens) OAT6_HUMAN Liver-specific organic anion transporter (Organic anion transport polypeptide 2) (OATP 2) | Chr1: 97.081173   | 5.68<br>0  | 45 | 10.8 | Chr4: 120.293959  | 0.04<br>0      |
| 247<br>☐ | MA_M2M_0706_R | <a href="#">1436542_at</a>   | <i>Ptger1</i>        | prostaglandin E receptor 1 (subtype EP1)                                                                                                                                                     | Chr8: 83.666864   | 9.83<br>0  | 45 | 15.1 | Chr8: 80.868085   | -<br>0.14<br>4 |
| 248<br>☐ | MA_M2M_0706_R | <a href="#">1416340_a_at</a> | <i>Man2b1</i>        | mannosidase 2, alpha B1; last four exons and 3' UTR                                                                                                                                          | Chr8: 85.096414   | 13.1<br>68 | 45 | 14.2 | ChrX: 102.126656  | 0.13<br>2      |

|                                 |               |                              |                       |                                                                                                            |                   |            |    |      |                  |            |
|---------------------------------|---------------|------------------------------|-----------------------|------------------------------------------------------------------------------------------------------------|-------------------|------------|----|------|------------------|------------|
| 249<br><input type="checkbox"/> | MA_M2M_0706_R | <a href="#">1428270_at</a>   | <i>Glt8d1</i>         | glycosyltransferase 8 domain containing 1; last 2 exons and proximal 3' UTR                                | Chr14: 31.011163  | 9.77<br>6  | 45 | 8.2  | Chr3: 28.727954  | -<br>0.128 |
| 250<br><input type="checkbox"/> | MA_M2M_0706_R | <a href="#">1446538_at</a>   | <i>Kpna3</i>          | karyopherin (importin) alpha 3; intron (from EST AK083505)                                                 | Chr14: 61.405964  | 7.33<br>5  | 45 | 9.7  | Chr6: 24.108037  | -<br>0.075 |
| 251<br><input type="checkbox"/> | MA_M2M_0706_R | <a href="#">1438740_at</a>   | <i>Nmt2</i>           | N-myristoyltransferase 2                                                                                   | Chr2: 3.326553    | 7.54<br>3  | 45 | 13.8 | Chr8: 123.289925 | -<br>0.094 |
| 252<br><input type="checkbox"/> | MA_M2M_0706_R | <a href="#">1419975_at</a>   | <i>Scp2</i>           | sterol carrier protein 2, liver; mid-distal 3' UTR                                                         | Chr4: 108.043986  | 10.1<br>66 | 45 | 10.2 | ChrX: 50.730573  | -<br>0.297 |
| 253<br><input type="checkbox"/> | MA_M2M_0706_R | <a href="#">1438198_at</a>   | <i>Bri3bp</i>         | BRI3 binding protein (cervical cancer oncogene binding protein); distal 3' UTR                             | Chr5: 125.459423  | 8.23<br>5  | 45 | 11.2 | Chr18: 58.397406 | 0.09<br>0  |
| 254<br><input type="checkbox"/> | MA_M2M_0706_R | <a href="#">1452193_a_at</a> | <i>Wasl</i>           | Wiskott-Aldrich syndrome-like; distal 3' UTR                                                               | Chr6: 24.613837   | 12.2<br>34 | 45 | 15.2 | Chr11: 62.251912 | 0.16<br>2  |
| 255<br><input type="checkbox"/> | MA_M2M_0706_R | <a href="#">1423670_a_at</a> | <i>Srpr</i>           | signal recognition particle receptor (ER docking protein); mid to distal 3' UTR                            | Chr9: 35.216428   | 12.3<br>99 | 45 | 10.3 | ChrX: 102.424804 | 0.07<br>8  |
| 256<br><input type="checkbox"/> | MA_M2M_0706_R | <a href="#">1454611_a_at</a> | <i>Calm1</i>          | calmodulin 1; proximal to mid 3'UTR                                                                        | Chr12: 100.207086 | 13.0<br>46 | 45 | 12.8 | ChrX: 102.126656 | -<br>0.143 |
| 257<br><input type="checkbox"/> | MA_M2M_0706_R | <a href="#">1454296_at</a>   | <i>Ralbp1</i>         | ralA binding protein 1                                                                                     | Chr17: 65.871706  | 6.78<br>2  | 45 | 11.5 | Chr1: 21.638463  | -<br>0.048 |
| 258<br><input type="checkbox"/> | MA_M2M_0706_R | <a href="#">1422801_at</a>   | <i>G3bp</i>           | Ras-GTPase-activating protein SH3-domain binding protein (interferon, alpha-inducible protein); mid 3' UTR | Chr11: 55.499735  | 11.7<br>63 | 45 | 7.4  | Chr11: 99.734855 | -<br>0.142 |
| 259<br><input type="checkbox"/> | MA_M2M_0706_R | <a href="#">1454495_at</a>   | <i>4930432 H08Rik</i> | RIKEN cDNA 4930432H08 gene                                                                                 | Chr5: 106.364646  | 6.50<br>7  | 45 | 9.6  | Chr17: 43.098144 | 0.06<br>3  |
| 260<br><input type="checkbox"/> | MA_M2M_0706_R | <a href="#">1417810_a_at</a> | <i>Pacsin2</i>        | protein kinase C and casein kinase substrate in neurons 2; distal 3' UTR                                   | Chr15: 83.376200  | 12.5<br>14 | 45 | 9.8  | Chr17: 10.720847 | 0.12<br>7  |
| 261<br><input type="checkbox"/> | MA_M2M_0706_R | <a href="#">1426456_a_at</a> | <i>Miz1</i>           | Msx-interacting-zinc finger; exons 8, 9, 10, and 11                                                        | Chr18: 77.133220  | 9.44<br>1  | 45 | 18.9 | Chr18: 78.806816 | 0.14<br>7  |
| 262<br><input type="checkbox"/> | MA_M2M_0706_R | <a href="#">1452734_at</a>   | <i>Rnaset2</i>        | ribonuclease T2                                                                                            | Chr17: 6.988754   | 14.7<br>25 | 45 | 13.7 | Chr17: 9.373070  | 0.11<br>2  |
| 263<br><input type="checkbox"/> | MA_M2M_0706_R | <a href="#">1424036_at</a>   | <i>Prpf6</i>          | PRP6 pre-mRNA splicing factor 6 homolog; last 4 exons                                                      | Chr2: 181.651122  | 10.0<br>56 | 45 | 11.7 | Chr18: 78.806816 | 0.09<br>8  |

**Supplemental Table S10. Top 200 genes closely correlated to the *Ace2* probes in female mice.**

|        | Dataset<br>AA | Trait ID<br>AA               | Symbol<br>AA   | Description<br>AA                                                                     | Location<br>AA    | Mean<br>AA | N Cases<br>AA | Max LRS?<br>AA | Max LRS Location Chr and Mb<br>AA | Adjusted?<br>AA |
|--------|---------------|------------------------------|----------------|---------------------------------------------------------------------------------------|-------------------|------------|---------------|----------------|-----------------------------------|-----------------|
| 1<br>□ | MA_M2F_0706_R | <a href="#">1425103_at</a>   | <i>Ace2</i>    | angiotensin I converting enzyme (peptidyl-dipeptidase A) 2; middle to distal 3'-UTR   | ChrX: 164.187853  | 10.112     | 65            | 17.2           | Chr16: 73.747956                  | -0.131          |
| 2<br>□ | MA_M2F_0706_R | <a href="#">1422789_at</a>   | <i>Aldh1a2</i> | aldehyde dehydrogenase family 1, subfamily A2; 3' UTR                                 | Chr9: 71.295684   | 7.918      | 65            | 18.5           | Chr17: 21.686210                  | -0.180          |
| 3<br>□ | MA_M2F_0706_R | <a href="#">1425102_a_at</a> | <i>Ace2</i>    | angiotensin I converting enzyme (peptidyl-dipeptidase A) 2; 3'-UTR and last 4 exons   | ChrX: 164.182645  | 10.046     | 65            | 12.7           | Chr14: 3.000000                   | 0.186           |
| 4<br>□ | MA_M2F_0706_R | <a href="#">1424209_at</a>   | <i>Rarsl</i>   | arginyl-tRNA synthetase-like; exons 15, 16, 17, 18 19, 20                             | Chr4: 34.656065   | 10.679     | 65            | 14.4           | Chr2: 170.826972                  | 0.084           |
| 5<br>□ | MA_M2F_0706_R | <a href="#">1420138_at</a>   | <i>Slc19a1</i> | solute carrier family 19 (sodium/hydrogen exchanger), member 1                        | Chr10: 77.050144  | 11.889     | 65            | 9.5            | Chr15: 95.949674                  | 0.113           |
| 6<br>□ | MA_M2F_0706_R | <a href="#">1424828_a_at</a> | <i>Fh1</i>     | fumarate hydratase, mitochondrial (fumarase); exons 8, 9, and 10, and proximal 3' UTR | Chr1: 175.601417  | 13.455     | 65            | 12.0           | Chr1: 163.338902                  | 0.068           |
| 7<br>□ | MA_M2F_0706_R | <a href="#">1415683_at</a>   | <i>Nmt1</i>    | N-myristoyltransferase 1; exons 10 and 11, and 3' UTR                                 | Chr11: 103.064733 | 11.775     | 65            | 11.8           | Chr10: 24.000000                  | 0.085           |
| 8<br>□ | MA_M2F_0706_R | <a href="#">1434900_at</a>   | <i>Mkl1</i>    | MKL (megakaryoblastic leukemia)/myocardin-like 1; mid distal 3' UTR                   | Chr15: 81.012534  | 9.424      | 65            | 16.6           | Chr15: 91.405127                  | -0.104          |

|                                |               |                              |                      |                                                                                                      |                  |            |    |      |                  |                |
|--------------------------------|---------------|------------------------------|----------------------|------------------------------------------------------------------------------------------------------|------------------|------------|----|------|------------------|----------------|
| 9<br><input type="checkbox"/>  | MA_M2F_0706_R | <a href="#">1438018_at</a>   | <i>Hook1</i>         | hook 1 (microtubule linker, endocytic membrane trafficking); distal 3' UTR                           | Chr4: 96.024792  | 11.8<br>82 | 65 | 12.1 | Chr15: 91.405127 | 0.12<br>6      |
| 10<br><input type="checkbox"/> | MA_M2F_0706_R | <a href="#">1428969_at</a>   | <i>Kiaa1012</i>      | protein TRS85 homolog (ER-Golgi transport); 3' UTR                                                   | Chr18: 20.817479 | 11.0<br>54 | 65 | 11.4 | Chr14: 3.000000  | 0.10<br>1      |
| 11<br><input type="checkbox"/> | MA_M2F_0706_R | <a href="#">1448206_at</a>   | <i>Psma2</i>         | proteasome (prosome, macropain) subunit, alpha type 2; last five exons and 3' UTR                    | Chr13: 14.619304 | 13.0<br>33 | 65 | 9.7  | Chr16: 74.917702 | -<br>0.07<br>9 |
| 12<br><input type="checkbox"/> | MA_M2F_0706_R | <a href="#">1452005_at</a>   | <i>Dlat</i>          | dihydrolipoamide S-acetyltransferase (E2 component of pyruvate dehydrogenase complex); distal 3' UTR | Chr9: 50.634731  | 10.1<br>57 | 65 | 10.7 | Chr9: 40.213083  | -<br>0.13<br>6 |
| 13<br><input type="checkbox"/> | MA_M2F_0706_R | <a href="#">1419519_at</a>   | <i>Igf1</i>          | insulin-like growth factor 1 (somatomedin C); 3' UTR                                                 | Chr10: 87.931240 | 7.42<br>2  | 65 | 8.9  | Chr9: 99.750326  | -<br>0.15<br>3 |
| 14<br><input type="checkbox"/> | MA_M2F_0706_R | <a href="#">1421019_at</a>   | <i>1700021F05Rik</i> | RIKEN cDNA 1700021F05; exons 1 and 3 and 3' UTR                                                      | Chr10: 43.525190 | 10.8<br>35 | 65 | 17.9 | Chr15: 91.405127 | 0.14<br>8      |
| 15<br><input type="checkbox"/> | MA_M2F_0706_R | <a href="#">1453880_s_at</a> | <i>1700041C02Rik</i> | RIKEN cDNA 1700041C02 gene                                                                           | Chr4: 119.377209 | 5.87<br>1  | 65 | 16.6 | Chr9: 88.498812  | 0.03<br>5      |
| 16<br><input type="checkbox"/> | MA_M2F_0706_R | <a href="#">1416472_at</a>   | <i>Syap1</i>         | synapse associated protein 1; mid-distal 3' UTR                                                      | ChrX: 162.857076 | 12.6<br>41 | 65 | 9.9  | Chr16: 85.961783 | -<br>0.07<br>9 |
| 17<br><input type="checkbox"/> | MA_M2F_0706_R | <a href="#">1417054_a_at</a> | <i>Sf3b14</i>        | splicing factor 3B, 14 kDa subunit; last 2 exons and proximal 3' UTR                                 | Chr12: 4.826831  | 12.0<br>53 | 65 | 10.6 | Chr15: 91.405127 | 0.14<br>7      |
| 18<br><input type="checkbox"/> | MA_M2F_0706_R | <a href="#">1415749_a_at</a> | <i>Rragc</i>         | Ras-related GTP binding C; mid-distal 3' UTR                                                         | Chr4: 123.936450 | 12.1<br>55 | 65 | 16.6 | Chr9: 88.498812  | 0.09<br>3      |
| 19<br><input type="checkbox"/> | MA_M2F_0706_R | <a href="#">1433545_s_at</a> | <i>Acad11</i>        | acyl-Coenzyme A dehydrogenase family, member 11; mid distal 3' UTR                                   | Chr9: 104.127137 | 13.0<br>85 | 65 | 14.4 | Chr9: 99.750326  | 0.12<br>9      |
| 20<br><input type="checkbox"/> | MA_M2F_0706_R | <a href="#">1426823_s_at</a> | <i>Psme4</i>         | proteasome (prosome, macropain) activator subunit 4                                                  | Chr11: 30.879986 | 12.9<br>09 | 65 | 21.7 | Chr11: 29.493209 | -<br>0.17<br>9 |
| 21<br><input type="checkbox"/> | MA_M2F_0706_R | <a href="#">1437391_x_at</a> | <i>Mrpl44</i>        | mitochondrial ribosomal protein L44                                                                  | Chr1: 79.781249  | 11.2<br>05 | 65 | 26.3 | Chr15: 89.576205 | 0.19<br>1      |
| 22<br><input type="checkbox"/> | MA_M2F_0706_R | <a href="#">1428645_at</a>   | <i>Gnai3</i>         | guanine nucleotide binding protein, alpha inhibiting 3; distal 3' UTR                                | Chr3: 108.107540 | 11.3<br>97 | 65 | 14.1 | Chr3: 134.523036 | -<br>0.14<br>0 |



|                                |               |                              |                  |                                                                                                                                                       |                   |        |    |      |                   |        |
|--------------------------------|---------------|------------------------------|------------------|-------------------------------------------------------------------------------------------------------------------------------------------------------|-------------------|--------|----|------|-------------------|--------|
| 23<br><input type="checkbox"/> | MA_M2F_0706_R | <a href="#">1417827_at</a>   | <i>Ngly1</i>     | N-glycanase 1; proximal and mid 3' UTR                                                                                                                | Chr14: 16.311019  | 11.104 | 65 | 14.3 | Chr8: 80.868085   | -0.115 |
| 24<br><input type="checkbox"/> | MA_M2F_0706_R | <a href="#">1417530_a_at</a> | <i>Srp9</i>      | signal recognition particle 9                                                                                                                         | Chr1: 182.131342  | 11.639 | 65 | 11.0 | Chr8: 25.520489   | -0.102 |
| 25<br><input type="checkbox"/> | MA_M2F_0706_R | <a href="#">1423709_s_at</a> | <i>Farslb</i>    | phenylalanine-tRNA synthetase-like, beta subunit; last 2 exons                                                                                        | Chr1: 78.443633   | 9.873  | 65 | 15.0 | Chr6: 42.000000   | -0.130 |
| 26<br><input type="checkbox"/> | MA_M2F_0706_R | <a href="#">1435178_x_at</a> | <i>Anapc5</i>    | anaphase-promoting complex subunit 5                                                                                                                  | Chr5: 11.351956   | 12.933 | 65 | 10.7 | Chr1: 178.015151  | 0.065  |
| 27<br><input type="checkbox"/> | MA_M2F_0706_R | <a href="#">1422854_at</a>   | <i>Shc1</i>      | src homology 2 domain-containing transforming protein C1                                                                                              | Chr3: 89.429142   | 10.818 | 65 | 15.8 | Chr15: 91.405127  | -0.184 |
| 28<br><input type="checkbox"/> | MA_M2F_0706_R | <a href="#">1448238_at</a>   | <i>C14orf166</i> | CLE7 homolog (UPF0568 protein); 3' half                                                                                                               | Chr14: 19.812115  | 12.645 | 65 | 11.2 | Chr16: 73.747956  | -0.086 |
| 29<br><input type="checkbox"/> | MA_M2F_0706_R | <a href="#">1424918_at</a>   | <i>Tbc1d19</i>   | TBC1 domain family, member 19                                                                                                                         | Chr5: 53.887402   | 10.323 | 65 | 13.8 | ChrX: 71.441039   | -0.142 |
| 30<br><input type="checkbox"/> | MA_M2F_0706_R | <a href="#">1448102_a_at</a> | <i>Wdr61</i>     | WD repeat domain 61; mid proximal 3' UTR                                                                                                              | Chr9: 54.717273   | 11.646 | 65 | 9.4  | Chr4: 96.896949   | 0.109  |
| 31<br><input type="checkbox"/> | MA_M2F_0706_R | <a href="#">1452737_at</a>   | <i>Smim15</i>    | small integral membrane protein 15; 3' UTR                                                                                                            | Chr13: 108.048608 | 11.910 | 65 | 10.4 | Chr10: 116.640226 | -0.115 |
| 32<br><input type="checkbox"/> | MA_M2F_0706_R | <a href="#">1417710_at</a>   | <i>Mettl9</i>    | methyltransferase like 9; last exon and proximal half of 3' UTR                                                                                       | Chr7: 121.076249  | 12.659 | 65 | 11.3 | Chr1: 73.418156   | 0.085  |
| 33<br><input type="checkbox"/> | MA_M2F_0706_R | <a href="#">1423127_at</a>   | <i>Impa1</i>     | inositol (myo)-1(or 4)-monophosphatase 1                                                                                                              | Chr3: 10.314235   | 10.724 | 65 | 11.4 | Chr3: 9.082402    | -0.151 |
| 34<br><input type="checkbox"/> | MA_M2F_0706_R | <a href="#">1420495_a_at</a> | <i>Vps26</i>     | vacuolar protein sorting 26 (retromer complex, involved in retrograde transport of proteins from endosomes to the trans-Golgi network); distal 3' UTR | Chr10: 62.455304  | 11.491 | 65 | 17.2 | Chr5: 99.299507   | 0.078  |
| 35<br><input type="checkbox"/> | MA_M2F_0706_R | <a href="#">1423651_at</a>   | <i>Isca1</i>     | iron-sulfur cluster assembly 1 homolog; distal 3' UTR                                                                                                 | Chr13: 21.496566  | 13.170 | 65 | 11.7 | Chr9: 107.824821  | 0.079  |
| 36<br><input type="checkbox"/> | MA_M2F_0706_R | <a href="#">1423711_at</a>   | <i>Ndutf1</i>    | NADH dehydrogenase (ubiquinone) 1 alpha subcomplex, assembly factor 1; last 3 exons and 3' UTR                                                        | Chr2: 119.655607  | 9.734  | 65 | 11.6 | Chr14: 3.000000   | 0.134  |

|                                |               |                              |                       |                                                                                                         |                   |        |    |      |                  |        |
|--------------------------------|---------------|------------------------------|-----------------------|---------------------------------------------------------------------------------------------------------|-------------------|--------|----|------|------------------|--------|
| 37<br><input type="checkbox"/> | MA_M2F_0706_R | <a href="#">1452211_at</a>   | <i>Psme4</i>          | proteasome (prosome, macropain) activator subunit 4; 3'UTR                                              | Chr11: 30.879764  | 12.074 | 65 | 22.3 | Chr11: 29.493209 | -0.167 |
| 38<br><input type="checkbox"/> | MA_M2F_0706_R | <a href="#">1435966_x_at</a> | <i>Mrpl13</i>         | mitochondrial ribosomal protein L13; Proximal, mid 3' UTR, and intorn                                   | Chr15: 55.534119  | 7.208  | 65 | 13.9 | Chr18: 82.240604 | -0.123 |
| 39<br><input type="checkbox"/> | MA_M2F_0706_R | <a href="#">1424770_at</a>   | <i>Cald1</i>          | caldesmon 1; exons 2 and 3 (last two of a short isoform)                                                | Chr6: 34.745616   | 9.541  | 65 | 10.5 | Chr10: 22.000000 | -0.168 |
| 40<br><input type="checkbox"/> | MA_M2F_0706_R | <a href="#">1450040_at</a>   | <i>Timp2</i>          | tissue inhibitor of metalloproteinase 2; mid 3' UTR                                                     | Chr11: 118.302339 | 10.776 | 65 | 12.7 | Chr4: 96.896949  | -0.119 |
| 41<br><input type="checkbox"/> | MA_M2F_0706_R | <a href="#">1417573_at</a>   | <i>Mmadhc</i>         | methylmalonic aciduria (cobalamin deficiency) cblD type, with homocystinuria; last two exons and 3' UTR | Chr2: 50.279951   | 11.670 | 65 | 10.5 | Chr3: 134.523036 | -0.097 |
| 42<br><input type="checkbox"/> | MA_M2F_0706_R | <a href="#">1434587_x_at</a> | <i>Ptdss2</i>         | phosphatidylserine synthase 2                                                                           | Chr7: 141.155733  | 10.985 | 65 | 11.4 | Chr4: 141.236455 | -0.065 |
| 43<br><input type="checkbox"/> | MA_M2F_0706_R | <a href="#">1415813_at</a>   | <i>Api5</i>           | apoptosis inhibitor 5; distal 3' UTR (transQTL on Chr 4 in BXD eye data)                                | Chr2: 94.411933   | 10.893 | 65 | 10.9 | Chr2: 102.660525 | -0.093 |
| 44<br><input type="checkbox"/> | MA_M2F_0706_R | <a href="#">1448492_a_at</a> | <i>Psmd12</i>         | proteasome (prosome, macropain) 26S subunit, non-ATPase, 12                                             | Chr11: 107.495733 | 11.237 | 65 | 13.4 | Chr9: 99.750326  | 0.076  |
| 45<br><input type="checkbox"/> | MA_M2F_0706_R | <a href="#">1428490_at</a>   | <i>C1galt1</i>        | core 1 synthase, glycoprotein-N-acetylgalactosamine 3-beta-galactosyltransferase                        | Chr6: 7.875102    | 10.287 | 65 | 12.3 | Chr4: 96.896949  | 0.131  |
| 46<br><input type="checkbox"/> | MA_M2F_0706_R | <a href="#">1424700_at</a>   | <i>Tmem38b</i>        | transmembrane protein 38B (trimeric intracellular cation channel type B); last exon                     | Chr4: 53.859998   | 12.660 | 65 | 13.8 | Chr16: 73.747956 | 0.124  |
| 47<br><input type="checkbox"/> | MA_M2F_0706_R | <a href="#">1416838_at</a>   | <i>Mut</i>            | methylmalonyl-Coenzyme A mutase; last three exons including proximal 3' UTR                             | Chr17: 40.958449  | 13.211 | 65 | 12.6 | Chr17: 9.373070  | 0.106  |
| 48<br><input type="checkbox"/> | MA_M2F_0706_R | <a href="#">1422471_at</a>   | <i>Pex13</i>          | peroxisomal biogenesis factor 13                                                                        | Chr11: 23.648970  | 11.367 | 65 | 10.6 | Chr16: 63.773114 | -0.111 |
| 49<br><input type="checkbox"/> | MA_M2F_0706_R | <a href="#">1452086_at</a>   | <i>2610027 O18Rik</i> | RIKEN cDNA 2610027O18 gene                                                                              | Chr12: 73.280555  | 7.543  | 65 | 13.9 | Chr9: 99.750326  | 0.052  |
| 50<br><input type="checkbox"/> | MA_M2F_0706_R | <a href="#">1416096_at</a>   | <i>AI413782</i>       | protein LOC63894; mid 3' UTR                                                                            | Chr12: 87.239058  | 10.350 | 65 | 9.7  | Chr9: 107.824821 | 0.081  |

|                                |               |                              |                      |                                                                                                          |                   |        |    |      |                   |        |
|--------------------------------|---------------|------------------------------|----------------------|----------------------------------------------------------------------------------------------------------|-------------------|--------|----|------|-------------------|--------|
| 51<br><input type="checkbox"/> | MA_M2F_0706_R | <a href="#">1431423_a_at</a> | <i>Med8</i>          | mediator of RNA polymerase II transcription, subunit 8 homolog; last 2 exons and proximal half of 3' UTR | Chr4: 118.413625  | 10.483 | 65 | 11.9 | Chr4: 102.851020  | 0.103  |
| 52<br><input type="checkbox"/> | MA_M2F_0706_R | <a href="#">1426759_at</a>   | <i>Map4k3</i>        | mitogen-activated protein kinase kinase kinase 3; distal 3' UTR                                          | Chr17: 80.580539  | 10.460 | 65 | 9.9  | Chr1: 173.633577  | 0.115  |
| 53<br><input type="checkbox"/> | MA_M2F_0706_R | <a href="#">1455007_s_at</a> | <i>Gpt2</i>          | glutamic pyruvate transaminase (alanine aminotransferase) 2; mid distal 3' UTR                           | Chr8: 85.526839   | 9.429  | 65 | 14.7 | Chr14: 107.221502 | 0.223  |
| 54<br><input type="checkbox"/> | MA_M2F_0706_R | <a href="#">1434037_s_at</a> | <i>Kat2b</i>         | K(lysine) acetyltransferase 2B (p300/CREB-binding protein-associated factor); distal 3' UTR              | Chr17: 53.672145  | 11.464 | 65 | 14.0 | Chr10: 19.937470  | 0.095  |
| 55<br><input type="checkbox"/> | MA_M2F_0706_R | <a href="#">1416466_at</a>   | <i>Vapa</i>          | vesicle-associated membrane protein, associated protein A; 3' UTR                                        | Chr17: 65.580288  | 13.258 | 65 | 10.0 | Chr15: 91.405127  | 0.082  |
| 56<br><input type="checkbox"/> | MA_M2F_0706_R | <a href="#">1427911_at</a>   | <i>2610307O08Rik</i> | RIKEN cDNA 2610307O08 gene                                                                               | Chr18: 35.734294  | 9.200  | 65 | 13.0 | Chr16: 73.747956  | 0.087  |
| 57<br><input type="checkbox"/> | MA_M2F_0706_R | <a href="#">1452662_a_at</a> | <i>Eif2s1</i>        | eukaryotic translation initiation factor 2, subunit 1 alpha; last two exons and proximal half of 3' UTR  | Chr12: 78.884789  | 10.839 | 65 | 10.6 | Chr16: 89.532874  | -0.085 |
| 58<br><input type="checkbox"/> | MA_M2F_0706_R | <a href="#">1455286_at</a>   | <i>Btbd1</i>         | BTB (POZ) domain containing 1; distal 3' UTR                                                             | Chr7: 81.792103   | 12.326 | 65 | 10.4 | Chr16: 88.032782  | -0.085 |
| 59<br><input type="checkbox"/> | MA_M2F_0706_R | <a href="#">1417316_at</a>   | <i>Them2</i>         | thioesterase superfamily member 2                                                                        | Chr13: 24.818001  | 13.114 | 65 | 13.5 | ChrX: 24.000000   | -0.080 |
| 60<br><input type="checkbox"/> | MA_M2F_0706_R | <a href="#">1427362_x_at</a> | <i>Hoxc6</i>         | homeo box C6; 3' UTR                                                                                     | Chr15: 103.011286 | 9.316  | 65 | 16.7 | Chr4: 78.900946   | -0.124 |
| 61<br><input type="checkbox"/> | MA_M2F_0706_R | <a href="#">1436919_at</a>   | <i>Tp53i11</i>       | transformation related protein 53 inducible protein 11; distal 3' UTR                                    | Chr2: 93.201169   | 9.062  | 65 | 12.0 | Chr10: 17.820266  | -0.120 |
| 62<br><input type="checkbox"/> | MA_M2F_0706_R | <a href="#">1423781_at</a>   | <i>Appbp1</i>        | amyloid beta precursor protein binding protein 1; exons 16, 18, 19, 20 and proximal 3' UTR               | Chr8: 104.513201  | 10.361 | 65 | 15.9 | Chr4: 96.896949   | 0.134  |
| 63<br><input type="checkbox"/> | MA_M2F_0706_R | <a href="#">1422880_at</a>   | <i>Sypl</i>          | synaptophysin-like protein; distal 3' UTR                                                                | Chr12: 32.976333  | 13.122 | 65 | 11.5 | Chr4: 81.958676   | 0.117  |

|    |               |                              |                 |                                                                                |                   |            |    |      |                  |                |
|----|---------------|------------------------------|-----------------|--------------------------------------------------------------------------------|-------------------|------------|----|------|------------------|----------------|
| 64 | MA_M2F_0706_R | <a href="#">1437143_a_at</a> | <i>Txndc1</i>   | thioredoxin domain containing 1; distal 3' UTR                                 | Chr12: 70.467464  | 11.3<br>61 | 65 | 18.4 | Chr15: 91.405127 | 0.15<br>3      |
| 65 | MA_M2F_0706_R | <a href="#">1434447_at</a>   | <i>Met</i>      | met proto-oncogene; distal 3' UTR                                              | Chr6: 17.573398   | 11.7<br>96 | 65 | 12.1 | Chr19: 14.967297 | -<br>0.12<br>4 |
| 66 | MA_M2F_0706_R | <a href="#">1426256_at</a>   | <i>Timm17a</i>  | translocator of inner mitochondrial membrane 17a                               | Chr1: 135.301708  | 12.1<br>21 | 65 | 14.7 | Chr15: 89.576205 | 0.11<br>4      |
| 67 | MA_M2F_0706_R | <a href="#">1415783_at</a>   | <i>Vps35</i>    | vacuolar protein sorting 35; 3' UTR                                            | Chr8: 85.260458   | 13.4<br>60 | 65 | 11.6 | Chr16: 73.747956 | -<br>0.09<br>0 |
| 68 | MA_M2F_0706_R | <a href="#">1422009_at</a>   | <i>Atp1b2</i>   | ATPase, Na+/K+ transporting, beta 2 polypeptide                                | Chr11: 69.601309  | 7.80<br>0  | 65 | 13.5 | Chr9: 99.750326  | -<br>0.10<br>8 |
| 69 | MA_M2F_0706_R | <a href="#">1450243_a_at</a> | <i>Dscr1l1</i>  | Down syndrome critical region gene 1-like 1; last three exons                  | Chr17: 44.017779  | 6.70<br>8  | 65 | 15.1 | Chr15: 91.405127 | -<br>0.08<br>9 |
| 70 | MA_M2F_0706_R | <a href="#">1450376_at</a>   | <i>Mxi1</i>     | Max interacting protein 1                                                      | Chr19: 53.372691  | 11.9<br>83 | 65 | 19.4 | Chr9: 105.556898 | 0.12<br>6      |
| 71 | MA_M2F_0706_R | <a href="#">1433846_s_at</a> | <i>Fam175b</i>  | abraxas brother 1, family with sequence similarity 175 member B; distal 3' UTR | Chr7: 132.884531  | 10.4<br>75 | 65 | 11.8 | Chr10: 24.000000 | 0.08<br>2      |
| 72 | MA_M2F_0706_R | <a href="#">1421164_a_at</a> | <i>Arhgef1</i>  | Rho guanine nucleotide exchange factor (GEF) 1                                 | Chr7: 24.925880   | 10.4<br>59 | 65 | 11.7 | Chr4: 81.726726  | -<br>0.09<br>4 |
| 73 | MA_M2F_0706_R | <a href="#">1417936_at</a>   | <i>Ccl9</i>     | chemokine (C-C motif) ligand 9                                                 | Chr11: 83.574911  | 7.36<br>2  | 65 | 11.7 | Chr4: 150.657930 | -<br>0.14<br>2 |
| 74 | MA_M2F_0706_R | <a href="#">1421185_at</a>   | <i>UbiE2</i>    | RIKEN cDNA 3300001H21 gene                                                     | Chr15: 100.328217 | 7.77<br>6  | 65 | 13.4 | Chr9: 94.904747  | -<br>0.09<br>5 |
| 75 | MA_M2F_0706_R | <a href="#">1433463_at</a>   | <i>Brox</i>     | BRO1 domain and CAAX motif containing; distal 3' UTR                           | Chr6: 112.608270  | 10.9<br>26 | 65 | 9.0  | Chr13: 45.359287 | 0.08<br>0      |
| 76 | MA_M2F_0706_R | <a href="#">1423073_at</a>   | <i>Cmpk</i>     | cytidylate kinase; distal half of 3' UTR                                       | Chr4: 114.960709  | 13.4<br>43 | 65 | 10.0 | Chr2: 80.054211  | -<br>0.07<br>8 |
| 77 | MA_M2F_0706_R | <a href="#">1437450_x_at</a> | <i>C14orf16</i> | CLE7 homolog (UPF0568 protein)                                                 | Chr14: 19.811971  | 12.2<br>00 | 65 | 13.4 | Chr16: 73.747956 | -<br>0.10<br>4 |
| 78 | MA_M2F_0706_R | <a href="#">1436215_at</a>   | <i>Ipmk</i>     | inositol polyphosphate multikinase; distal 3' UTR                              | Chr10: 71.385472  | 10.8<br>13 | 65 | 13.8 | Chr15: 91.405127 | 0.14<br>0      |
| 79 | MA_M2F_0706_R | <a href="#">1416596_at</a>   | <i>Slc44a4</i>  | solute carrier family 44, member 4 (choline transporter-like); last five exons | Chr17: 34.928445  | 12.2<br>57 | 65 | 11.7 | Chr9: 107.639250 | 0.11<br>9      |

|                                |               |                              |                       |                                                                                                      |                  |        |    |      |                  |        |
|--------------------------------|---------------|------------------------------|-----------------------|------------------------------------------------------------------------------------------------------|------------------|--------|----|------|------------------|--------|
| 80<br><input type="checkbox"/> | MA_M2F_0706_R | <a href="#">1451719_at</a>   | <i>Crsp6</i>          | cofactor required for Sp1 transcriptional activation, subunit 6                                      | Chr9: 15.260462  | 6.667  | 65 | 15.3 | Chr16: 17.412078 | 0.058  |
| 81<br><input type="checkbox"/> | MA_M2F_0706_R | <a href="#">1429088_at</a>   | <i>Lbh</i>            | limb bud and heart development (lupus brain antigen 1); distal 3' UTR                                | Chr17: 72.941355 | 9.300  | 65 | 10.8 | Chr6: 44.030269  | 0.158  |
| 82<br><input type="checkbox"/> | MA_M2F_0706_R | <a href="#">1435636_at</a>   | <i>Ago2</i>           | argonaute RISC catalytic component 2 (eukaryotic translation initiation factor 2C, 2); distal 3' UTR | Chr15: 73.099051 | 9.907  | 65 | 14.1 | Chr15: 89.576205 | -0.123 |
| 83<br><input type="checkbox"/> | MA_M2F_0706_R | <a href="#">1451247_at</a>   | <i>Mfsd1</i>          | major facilitator superfamily domain containing 1; distal 3'UTR                                      | Chr3: 67.603676  | 12.654 | 65 | 13.8 | Chr15: 91.405127 | 0.103  |
| 84<br><input type="checkbox"/> | MA_M2F_0706_R | <a href="#">1421104_at</a>   | <i>Mpa2</i>           | macrophage activation 2                                                                              | Chr10: 77.268946 | 7.246  | 65 | 10.7 | Chr19: 23.135216 | -0.054 |
| 85<br><input type="checkbox"/> | MA_M2F_0706_R | <a href="#">1434038_at</a>   | <i>Dnajc13</i>        | DnaJ (Hsp40) homolog, subfamily C, member 13                                                         | Chr9: 104.151791 | 11.426 | 65 | 16.1 | Chr9: 99.750326  | 0.117  |
| 86<br><input type="checkbox"/> | MA_M2F_0706_R | <a href="#">1416678_at</a>   | <i>Cops3</i>          | COP9 (constitutive photomorphogenic) homolog, subunit 3; last four exons and 3' UTR                  | Chr11: 59.817915 | 11.640 | 65 | 9.5  | Chr9: 107.639250 | 0.087  |
| 87<br><input type="checkbox"/> | MA_M2F_0706_R | <a href="#">1436139_at</a>   | <i>Mdga2</i>          | MAM domain containing glycosylphosphatidylinositol anchor 2; putative far 3' UTR element             | Chr12: 66.466121 | 5.517  | 65 | 14.0 | Chr6: 3.266392   | 0.023  |
| 88<br><input type="checkbox"/> | MA_M2F_0706_R | <a href="#">1460745_at</a>   | <i>A630098 A13Rik</i> | RIKEN cDNA A630098A13 gene                                                                           | Chr14: 53.961232 | 6.670  | 65 | 10.2 | Chr7: 89.123287  | -0.039 |
| 89<br><input type="checkbox"/> | MA_M2F_0706_R | <a href="#">1415966_a_at</a> | <i>Ndufv1</i>         | NADH dehydrogenase (ubiquinone) flavoprotein 1; last exon                                            | Chr19: 4.007602  | 14.081 | 65 | 10.1 | Chr16: 73.747956 | -0.097 |
| 90<br><input type="checkbox"/> | MA_M2F_0706_R | <a href="#">1416570_s_at</a> | <i>Gfm1</i>           | G elongation factor 1                                                                                | Chr3: 67.473475  | 11.851 | 65 | 9.8  | Chr3: 65.564009  | -0.126 |
| 91<br><input type="checkbox"/> | MA_M2F_0706_R | <a href="#">1421374_a_at</a> | <i>Fxyd1</i>          | FXYD domain-containing ion transport regulator 1; last 6 exons except last exon and proximal 3' UTR  | Chr7: 31.053025  | 11.031 | 65 | 16.0 | Chr16: 89.532874 | 0.200  |
| 92<br><input type="checkbox"/> | MA_M2F_0706_R | <a href="#">1455626_at</a>   | <i>Hoxa9</i>          | homeo box A9                                                                                         | Chr6: 52.223121  | 11.691 | 65 | 11.5 | Chr15: 91.405127 | 0.120  |

|                                 |               |                              |                |                                                                                                                                                                                                     |                  |        |    |      |                  |        |
|---------------------------------|---------------|------------------------------|----------------|-----------------------------------------------------------------------------------------------------------------------------------------------------------------------------------------------------|------------------|--------|----|------|------------------|--------|
| 93<br><input type="checkbox"/>  | MA_M2F_0706_R | <a href="#">1438647_x_at</a> | <i>Cetn2</i>   | centrin 2                                                                                                                                                                                           | ChrX: 72.913746  | 10.870 | 65 | 17.4 | Chr16: 73.747956 | -0.167 |
| 94<br><input type="checkbox"/>  | MA_M2F_0706_R | <a href="#">1452812_at</a>   | <i>Lphn1</i>   | latrophilin 1                                                                                                                                                                                       | Chr8: 83.939489  | 8.548  | 65 | 16.5 | Chr4: 86.450967  | -0.133 |
| 95<br><input type="checkbox"/>  | MA_M2F_0706_R | <a href="#">1422442_at</a>   | <i>Smu1</i>    | smu-1 suppressor of mec-8 and unc-52 homolog (C. elegans); 3 exons and 3'UTR                                                                                                                        | Chr4: 40.737149  | 12.387 | 65 | 10.6 | Chr4: 119.382248 | 0.067  |
| 96<br><input type="checkbox"/>  | MA_M2F_0706_R | <a href="#">1424274_at</a>   | <i>Uso1</i>    | USO1 homolog, vesicle docking protein (vesicle docking protein); mid and mid-distal 3' UTR                                                                                                          | Chr5: 92.202219  | 11.228 | 65 | 11.9 | Chr8: 24.838961  | -0.144 |
| 97<br><input type="checkbox"/>  | MA_M2F_0706_R | <a href="#">1434665_at</a>   | <i>Aga</i>     | aspartylglucosaminidase; exons 6, 7, and 8                                                                                                                                                          | Chr8: 53.521136  | 10.853 | 65 | 11.1 | Chr9: 88.498812  | 0.110  |
| 98<br><input type="checkbox"/>  | MA_M2F_0706_R | <a href="#">1416923_a_at</a> | <i>Bnip3l</i>  | BCL2/adenovirus E1B 19kDa-interacting protein 3-like                                                                                                                                                | Chr14: 66.985274 | 11.039 | 65 | 13.2 | Chr10: 19.937470 | 0.133  |
| 99<br><input type="checkbox"/>  | MA_M2F_0706_R | <a href="#">1424148_a_at</a> | <i>Stap2</i>   | signal transducing adaptor family member 2; exon                                                                                                                                                    | Chr17: 55.997780 | 10.110 | 65 | 12.2 | Chr16: 73.747956 | 0.210  |
| 100<br><input type="checkbox"/> | MA_M2F_0706_R | <a href="#">1426668_at</a>   | <i>Slc30a9</i> | solute carrier family 30 (zinc transporter), member 9; distal half of 3' UTR                                                                                                                        | Chr5: 67.355241  | 11.648 | 65 | 16.1 | Chr10: 17.820266 | 0.153  |
| 101<br><input type="checkbox"/> | MA_M2F_0706_R | <a href="#">1420847_a_at</a> | <i>Fgfr2</i>   | Fgfr2 fibroblast growth factor receptor 2; last 3 exons and 3' UTR                                                                                                                                  | Chr7: 130.163853 | 7.734  | 65 | 14.7 | Chr15: 91.405127 | -0.111 |
| 102<br><input type="checkbox"/> | MA_M2F_0706_R | <a href="#">1419426_s_at</a> | <i>Ccl21</i>   | CCL complex region (chemokine (C-C motif) ligand 21, Ccl19, Ccl27, Il11ra2) probe set, RIKEN cDNA 4933409K07 gene; last two exons and 3' UTR (copy number variation in mice, segmental duplication) | Chr4: 41.904067  | 10.263 | 65 | 12.3 | Chr16: 69.651524 | 0.181  |
| 103<br><input type="checkbox"/> | MA_M2F_0706_R | <a href="#">1453269_at</a>   | <i>Unc5b</i>   | unc-5 homolog B (C. elegans)                                                                                                                                                                        | Chr10: 60.764623 | 7.274  | 65 | 11.2 | Chr19: 3.337223  | -0.051 |
| 104<br><input type="checkbox"/> | MA_M2F_0706_R | <a href="#">1435965_at</a>   | <i>Cnot3</i>   | CCR4-NOT transcription complex, subunit 3; last exon and 3' UTR                                                                                                                                     | Chr3: 96.454606  | 10.641 | 65 | 8.5  | Chr16: 85.961783 | 0.129  |
| 105<br><input type="checkbox"/> | MA_M2F_0706_R | <a href="#">1448856_a_at</a> | <i>Msra</i>    | methionine sulfoxide reductase A; 3' UTR                                                                                                                                                            | Chr14: 64.122780 | 13.960 | 65 | 10.6 | Chr1: 46.908195  | 0.091  |

|          |               |                              |               |                                                                                           |                   |            |    |      |                  |                |
|----------|---------------|------------------------------|---------------|-------------------------------------------------------------------------------------------|-------------------|------------|----|------|------------------|----------------|
| 106<br>☐ | MA_M2F_0706_R | <a href="#">1439029_at</a>   | <i>Gpt2</i>   | glutamic pyruvate transaminase (alanine aminotransferase) 2                               | Chr8: 85.523253   | 9.94<br>4  | 65 | 14.3 | Chr19: 23.853320 | 0.21<br>2      |
| 107<br>☐ | MA_M2F_0706_R | <a href="#">1450721_at</a>   | <i>Acp1</i>   | acid phosphatase 1, soluble; proximal 3' UTR                                              | Chr12: 30.895096  | 11.8<br>25 | 65 | 19.7 | Chr15: 91.405127 | 0.11<br>8      |
| 108<br>☐ | MA_M2F_0706_R | <a href="#">1452466_a_at</a> | <i>Rbm6</i>   | RNA binding motif protein 6; sixth, fifth, and fourth to last exons                       | Chr9: 107.779589  | 9.80<br>0  | 65 | 14.1 | Chr16: 63.773114 | 0.10<br>5      |
| 109<br>☐ | MA_M2F_0706_R | <a href="#">1460295_s_at</a> | <i>Il6st</i>  | interleukin 6 signal transducer; proximal to mid 3' UTR                                   | Chr13: 112.505179 | 9.44<br>8  | 65 | 11.2 | Chr15: 91.405127 | -<br>0.17<br>3 |
| 110<br>☐ | MA_M2F_0706_R | <a href="#">1417512_at</a>   | <i>Evi5</i>   | ecotropic viral integration site 5                                                        | Chr5: 107.744913  | 10.9<br>48 | 65 | 11.6 | Chr3: 39.650830  | -<br>0.14<br>2 |
| 111<br>☐ | MA_M2F_0706_R | <a href="#">1450159_at</a>   | <i>Rem1</i>   | rad and gem related GTP binding protein 1                                                 | Chr2: 152.634893  | 6.89<br>1  | 65 | 15.6 | Chr2: 107.153805 | 0.06<br>7      |
| 112<br>☐ | MA_M2F_0706_R | <a href="#">1421836_at</a>   | <i>Mtap7</i>  | microtubule-associated protein 7 (male sterility and histoincompatibility); distal 3' UTR | Chr10: 20.280929  | 12.7<br>83 | 65 | 80.3 | Chr10: 19.937470 | 0.45<br>5      |
| 113<br>☐ | MA_M2F_0706_R | <a href="#">1458268_s_at</a> | <i>Igfbp3</i> | insulin-like growth factor binding protein 3                                              | Chr11: 7.206603   | 12.2<br>14 | 65 | 15.7 | Chr15: 89.576205 | -<br>0.23<br>4 |
| 114<br>☐ | MA_M2F_0706_R | <a href="#">1417258_at</a>   | <i>Cct5</i>   | chaperonin subunit 5 (epsilon); exons 8, 9, 10                                            | Chr15: 31.592291  | 12.8<br>80 | 65 | 10.4 | Chr15: 93.454108 | 0.08<br>9      |
| 115<br>☐ | MA_M2F_0706_R | <a href="#">1428594_at</a>   | <i>Garnl1</i> | GTPase activating RANGAP domain-like 1; distal 3' UTR                                     | Chr12: 55.603286  | 10.1<br>25 | 65 | 6.9  | Chr10: 9.609272  | 0.08<br>1      |
| 116<br>☐ | MA_M2F_0706_R | <a href="#">1433527_at</a>   | <i>Ireb2</i>  | iron responsive element binding protein 2; distal 3'UTR                                   | Chr9: 54.911952   | 10.2<br>21 | 65 | 11.4 | Chr2: 149.665875 | -<br>0.12<br>3 |
| 117<br>☐ | MA_M2F_0706_R | <a href="#">1460429_at</a>   | <i>Cdc5l</i>  | cell division cycle 5-like; last 2 exons and 3' UTR                                       | Chr17: 45.392040  | 10.6<br>55 | 65 | 12.8 | Chr16: 63.773114 | -<br>0.11<br>1 |
| 118<br>☐ | MA_M2F_0706_R | <a href="#">1448809_at</a>   | <i>Cse1l</i>  | chromosome segregation 1-like; last 2 exons and 3' UTR                                    | Chr2: 166.945703  | 10.3<br>13 | 65 | 12.0 | Chr15: 91.405127 | 0.11<br>9      |
| 119<br>☐ | MA_M2F_0706_R | <a href="#">1433535_x_at</a> | <i>Cct2</i>   | chaperonin subunit 2 (beta)                                                               | Chr10: 103.893749 | 12.7<br>56 | 65 | 16.1 | Chr16: 63.773114 | -<br>0.10<br>7 |
| 120<br>☐ | MA_M2F_0706_R | <a href="#">1449935_a_at</a> | <i>Dnaja3</i> | DnaJ (Hsp40) homolog, subfamily A, member 3; mid-distal 3' UTR                            | Chr16: 4.707167   | 11.5<br>62 | 65 | 14.7 | Chr4: 155.225671 | 0.08<br>8      |
| 121<br>☐ | MA_M2F_0706_R | <a href="#">1416270_at</a>   | <i>Polr2g</i> | polymerase (RNA) II (DNA directed)                                                        | Chr19: 8.793198   | 11.5<br>81 | 65 | 10.6 | Chr16: 89.532874 | -<br>0.08<br>0 |

|                                 |               |                              |                      |                                                                                                                                                     |                  |        |    |      |                  |        |
|---------------------------------|---------------|------------------------------|----------------------|-----------------------------------------------------------------------------------------------------------------------------------------------------|------------------|--------|----|------|------------------|--------|
|                                 |               |                              |                      | polypeptide G; exons 3, 4, 5, 7, and 3' UTR                                                                                                         |                  |        |    |      |                  |        |
| 122<br><input type="checkbox"/> | MA_M2F_0706_R | <a href="#">1460688_s_at</a> | <b>AA407659</b>      | expressed sequence AA407659                                                                                                                         | Chr5: 115.122729 | 11.914 | 65 | 14.9 | Chr4: 78.900946  | 0.139  |
| 123<br><input type="checkbox"/> | MA_M2F_0706_R | <a href="#">1423486_at</a>   | <i>Cript</i>         | postsynaptic protein CRIPT (cysteine-rich PDZ-binding protein); last several exons and 3' UTR                                                       | Chr17: 87.034276 | 12.203 | 65 | 10.2 | Chr15: 87.476581 | 0.079  |
| 124<br><input type="checkbox"/> | MA_M2F_0706_R | <a href="#">1423746_at</a>   | <i>Txndc5</i>        | thioredoxin domain containing 5                                                                                                                     | Chr13: 38.501121 | 11.683 | 65 | 20.1 | Chr9: 99.750326  | -0.160 |
| 125<br><input type="checkbox"/> | MA_M2F_0706_R | <a href="#">1450699_at</a>   | <i>Selenbp1</i>      | selenium binding protein 1                                                                                                                          | Chr3: 94.944489  | 14.224 | 65 | 21.8 | Chr9: 99.750326  | 0.113  |
| 126<br><input type="checkbox"/> | MA_M2F_0706_R | <a href="#">1426529_a_at</a> | <i>Tagln2</i>        | transgelin 2; mid and distal 3' UTR                                                                                                                 | Chr1: 172.506826 | 12.074 | 65 | 22.4 | Chr1: 172.235364 | -0.174 |
| 127<br><input type="checkbox"/> | MA_M2F_0706_R | <a href="#">1415678_at</a>   | <i>Ppm1a</i>         | protein phosphatase, Mg2+/Mn2+ dependent 1A; 3' UTR                                                                                                 | Chr12: 72.793964 | 11.854 | 65 | 14.1 | Chr4: 78.900946  | 0.105  |
| 128<br><input type="checkbox"/> | MA_M2F_0706_R | <a href="#">1449418_s_at</a> | <i>Fbxo36</i>        | DNA segment, Chr 1, ERATO Doi 757, expressed                                                                                                        | Chr1: 84.896587  | 8.758  | 65 | 14.4 | Chr16: 63.773114 | -0.107 |
| 129<br><input type="checkbox"/> | MA_M2F_0706_R | <a href="#">1451369_at</a>   | <i>Commd5</i>        | COMM domain containing 5; middle of only exon                                                                                                       | Chr15: 76.900714 | 11.258 | 65 | 15.0 | Chr9: 88.498812  | -0.179 |
| 130<br><input type="checkbox"/> | MA_M2F_0706_R | <a href="#">1434132_at</a>   | <i>Spg8</i>          | spastic paraplegia 8 (strumpellin); last three exons and proximal 3' UTR                                                                            | Chr15: 59.332020 | 11.795 | 65 | 7.7  | Chr5: 117.810543 | 0.071  |
| 131<br><input type="checkbox"/> | MA_M2F_0706_R | <a href="#">1432717_at</a>   | <i>Glccl1</i>        | glucocorticoid induced transcript 1                                                                                                                 | Chr6: 8.415255   | 6.598  | 65 | 7.7  | Chr16: 63.773114 | -0.036 |
| 132<br><input type="checkbox"/> | MA_M2F_0706_R | <a href="#">1460131_at</a>   | <b>2810040C05Rik</b> | RIKEN cDNA 2810040C05 gene                                                                                                                          | Chr8: 26.131805  | 6.936  | 65 | 12.6 | Chr9: 99.750326  | -0.048 |
| 133<br><input type="checkbox"/> | MA_M2F_0706_R | <a href="#">1456748_a_at</a> | <i>Nipsnap1</i>      | 4-nitrophenylphosphatase domain and non-neuronal SNAP25-like protein homolog 1; distal 3' UTR                                                       | Chr11: 4.894050  | 11.565 | 65 | 11.3 | Chr9: 83.778825  | 0.146  |
| 134<br><input type="checkbox"/> | MA_M2F_0706_R | <a href="#">1420776_a_at</a> | <i>Auh</i>           | AU RNA binding protein/enoyl-coenzyme A hydratase (mitochondrial, 3-methylglutaconic aciduria, type I); last four exons and proximal half of 3' UTR | Chr13: 52.835320 | 12.010 | 65 | 16.4 | Chr13: 51.479103 | 0.104  |



|                                 |               |                              |                      |                                                                                                                                                                                                                   |                  |            |    |      |                   |            |
|---------------------------------|---------------|------------------------------|----------------------|-------------------------------------------------------------------------------------------------------------------------------------------------------------------------------------------------------------------|------------------|------------|----|------|-------------------|------------|
| 135<br><input type="checkbox"/> | MA_M2F_0706_R | <a href="#">1415775_at</a>   | <i>Rbbp7</i>         | retinoblastoma binding protein 7; last two exons and 3' UTR                                                                                                                                                       | ChrX: 162.777771 | 12.3<br>28 | 65 | 10.2 | Chr3: 134.523036  | -<br>0.084 |
| 136<br><input type="checkbox"/> | MA_M2F_0706_R | <a href="#">1448654_at</a>   | <i>Mtch2</i>         | mitochondrial carrier homolog 2; distal 3' UTR                                                                                                                                                                    | Chr2: 90.866101  | 10.2<br>82 | 65 | 15.4 | Chr4: 102.851020  | 0.190      |
| 137<br><input type="checkbox"/> | MA_M2F_0706_R | <a href="#">1448860_at</a>   | <i>Rem2</i>          | rad and gem related GTP binding protein 2; 3' UTR                                                                                                                                                                 | Chr14: 54.479912 | 8.14<br>9  | 65 | 11.2 | Chr15: 93.454108  | -<br>0.074 |
| 138<br><input type="checkbox"/> | MA_M2F_0706_R | <a href="#">1455604_at</a>   | <i>AI427138</i>      | expressed sequence AI427138; distal 3' UTR                                                                                                                                                                        | Chr1: 64.730740  | 8.70<br>2  | 65 | 8.7  | Chr14: 48.527624  | 0.115      |
| 139<br><input type="checkbox"/> | MA_M2F_0706_R | <a href="#">1452093_at</a>   | <i>Tmem185b</i>      | transmembrane protein 185B; 3' UTR                                                                                                                                                                                | Chr1: 119.527628 | 9.69<br>7  | 65 | 15.1 | Chr14: 3.000000   | 0.125      |
| 140<br><input type="checkbox"/> | MA_M2F_0706_R | <a href="#">1415901_at</a>   | <i>Plod3</i>         | procollagen-lysine, 2-oxoglutarate 5-dioxygenase 3 (RER protein critical for stability of crosslinks. Ehlers-Danlos syndrome type VIB have deficiencies in lysyl hydroxylase); last two exons and proximal 3' UTR | Chr5: 136.994931 | 10.9<br>58 | 65 | 18.5 | Chr5: 135.879195  | 0.095      |
| 141<br><input type="checkbox"/> | MA_M2F_0706_R | <a href="#">1421118_a_at</a> | <i>Gpr56</i>         | G protein-coupled receptor 56; 3' UTR                                                                                                                                                                             | Chr8: 95.013029  | 11.0<br>29 | 65 | 11.5 | Chr19: 15.292517  | 0.172      |
| 142<br><input type="checkbox"/> | MA_M2F_0706_R | <a href="#">1425143_a_at</a> | <i>Ndufs1</i>        | NADH dehydrogenase (ubiquinone) Fe-S protein 1; last 3 exons and proximal 3' UTR                                                                                                                                  | Chr1: 63.143795  | 13.5<br>16 | 65 | 15.0 | Chr14: 107.221502 | -<br>0.084 |
| 143<br><input type="checkbox"/> | MA_M2F_0706_R | <a href="#">1425554_a_at</a> | <i>Cdc16</i>         | CDC16 cell division cycle 16 homolog (S. cerevisiae); 2 exons and 3'UTR                                                                                                                                           | Chr8: 13.779240  | 11.2<br>53 | 65 | 10.9 | Chr15: 91.405127  | 0.083      |
| 144<br><input type="checkbox"/> | MA_M2F_0706_R | <a href="#">1424427_at</a>   | <i>Tada1l</i>        | transcriptional adaptor 1 (HFI1 homolog, yeast like (SPT3-associated factor 42); mid and distal 3' UTR                                                                                                            | Chr1: 166.393042 | 8.62<br>5  | 65 | 11.7 | Chr2: 148.055322  | -<br>0.109 |
| 145<br><input type="checkbox"/> | MA_M2F_0706_R | <a href="#">1428662_a_at</a> | <i>Hopx</i>          | HOP homeobox; mid and mid distal 3' UTR                                                                                                                                                                           | Chr5: 77.087372  | 11.2<br>55 | 65 | 11.8 | Chr9: 88.498812   | -<br>0.119 |
| 146<br><input type="checkbox"/> | MA_M2F_0706_R | <a href="#">1455925_at</a>   | <i>Prdm8</i>         | PR domain containing 8; mid 3' UTR                                                                                                                                                                                | Chr5: 98.186885  | 5.80<br>3  | 65 | 10.2 | Chr14: 55.622689  | 0.025      |
| 147<br><input type="checkbox"/> | MA_M2F_0706_R | <a href="#">1431109_at</a>   | <i>5430406M13Rik</i> | RIKEN cDNA 5430406M13 gene                                                                                                                                                                                        | Chr18: 51.303995 | 6.61<br>0  | 65 | 10.3 | Chr4: 96.896949   | -<br>0.062 |

|          |               |                              |                       |                                                                                                      |                  |            |    |      |                  |                |
|----------|---------------|------------------------------|-----------------------|------------------------------------------------------------------------------------------------------|------------------|------------|----|------|------------------|----------------|
| 148<br>☐ | MA_M2F_0706_R | <a href="#">1429278_at</a>   | <i>2410170 E07Rik</i> | RIKEN cDNA 2410170E07 gene                                                                           | Chr7: 140.992613 | 10.3<br>31 | 65 | 18.5 | Chr9: 99.750326  | 0.14<br>1      |
| 149<br>☐ | MA_M2F_0706_R | <a href="#">1428955_x_at</a> | <i>Slc9a3r2</i>       | solute carrier family 9 (sodium/hydrogen exchanger), isoform 3 regulator 2                           | Chr17: 24.639295 | 9.94<br>2  | 65 | 13.5 | Chr9: 107.639250 | -<br>0.11<br>3 |
| 150<br>☐ | MA_M2F_0706_R | <a href="#">1454159_a_at</a> | <i>Igfbp2</i>         | insulin-like growth factor binding protein 2, 36kDa (trabecular meshwork); last two exons and 3' UTR | Chr1: 72.849669  | 7.76<br>2  | 65 | 9.2  | Chr14: 55.622689 | -<br>0.26<br>9 |
| 151<br>☐ | MA_M2F_0706_R | <a href="#">1423197_a_at</a> | <i>Smek2</i>          | SMEK homolog 2 suppressor of mek1                                                                    | Chr11: 29.220542 | 9.13<br>9  | 65 | 9.0  | Chr14: 3.000000  | 0.11<br>4      |
| 152<br>☐ | MA_M2F_0706_R | <a href="#">1448610_a_at</a> | <i>Sod2</i>           | superoxide dismutase 2, mitochondrial; last exon and proximal 3' UTR                                 | Chr17: 13.015161 | 13.3<br>75 | 65 | 17.9 | Chr15: 89.576205 | 0.14<br>0      |
| 153<br>☐ | MA_M2F_0706_R | <a href="#">1453104_at</a>   | <i>Mapk1</i>          | mitogen activated protein kinase 1 (ERK2); distal 3' UTR                                             | Chr16: 17.046931 | 11.2<br>16 | 65 | 10.7 | Chr15: 91.405127 | 0.10<br>2      |
| 154<br>☐ | MA_M2F_0706_R | <a href="#">1430500_s_at</a> | <i>Mtx2</i>           | metaxin 2; 3 exons                                                                                   | Chr2: 74.869348  | 11.4<br>66 | 65 | 15.1 | Chr4: 96.896949  | 0.13<br>7      |
| 155<br>☐ | MA_M2F_0706_R | <a href="#">1448434_at</a>   | <i>Rnf103</i>         | ring finger protein 103; last exon and proximal 3' UTR                                               | Chr6: 71.510307  | 10.6<br>64 | 65 | 9.0  | Chr8: 24.838961  | -<br>0.12<br>9 |
| 156<br>☐ | MA_M2F_0706_R | <a href="#">1423044_at</a>   | <i>Prosc</i>          | proline synthetase co-transcribed                                                                    | Chr8: 27.054003  | 12.8<br>57 | 65 | 13.7 | Chr9: 99.750326  | 0.09<br>6      |
| 157<br>☐ | MA_M2F_0706_R | <a href="#">1420846_at</a>   | <i>Mrps2</i>          | mitochondrial ribosomal protein S2 (28S subunit); distal half of 3' UTR                              | Chr2: 28.470640  | 10.6<br>32 | 65 | 13.5 | Chr4: 102.851020 | 0.09<br>4      |
| 158<br>☐ | MA_M2F_0706_R | <a href="#">1416859_at</a>   | <i>Fkbp3</i>          | FK506 binding protein 3; last four exons                                                             | Chr12: 65.063678 | 10.7<br>87 | 65 | 16.2 | Chr3: 134.523036 | -<br>0.12<br>2 |
| 159<br>☐ | MA_M2F_0706_R | <a href="#">1457677_at</a>   | <i>C920016 K16Rik</i> | RIKEN cDNA C920016K16; distal 3' UTR                                                                 | Chr17: 33.004869 | 8.03<br>8  | 65 | 12.4 | Chr1: 191.333382 | -<br>0.06<br>1 |
| 160<br>☐ | MA_M2F_0706_R | <a href="#">1439411_a_at</a> | <i>Xpo7</i>           | exportin 7; 3' UTR                                                                                   | Chr14: 70.664564 | 8.78<br>7  | 65 | 13.8 | Chr15: 91.405127 | 0.21<br>1      |
| 161<br>☐ | MA_M2F_0706_R | <a href="#">1460341_at</a>   | <i>Plekfb2</i>        | pleckstrin homology domain containing, family B (evectins) member 2; distal 3' UTR                   | Chr1: 34.879012  | 13.2<br>39 | 65 | 16.4 | Chr9: 107.824821 | 0.17<br>6      |
| 162<br>☐ | MA_M2F_0706_R | <a href="#">1456530_x_at</a> | <i>Elovl1</i>         | elongation of very long chain fatty acids (FEN1/Elo2, SUR4/Elo3)-like 1; mid 3' UTR                  | Chr4: 118.432469 | 11.6<br>61 | 65 | 16.3 | Chr15: 89.576205 | 0.16<br>2      |

|                                 |               |                              |                      |                                                                                           |                  |            |    |      |                   |                |
|---------------------------------|---------------|------------------------------|----------------------|-------------------------------------------------------------------------------------------|------------------|------------|----|------|-------------------|----------------|
| 163<br><input type="checkbox"/> | MA_M2F_0706_R | <a href="#">1450897_at</a>   | <i>Arhgap5</i>       | Rho GTPase activating protein 5                                                           | Chr12: 52.568389 | 11.3<br>11 | 65 | 10.0 | Chr16: 66.730522  | -<br>0.12<br>1 |
| 164<br><input type="checkbox"/> | MA_M2F_0706_R | <a href="#">1417243_at</a>   | <i>Nip30</i>         | hypothetical protein LOC80011; 3' UTR                                                     | Chr8: 94.575017  | 10.3<br>72 | 65 | 16.2 | Chr9: 88.498812   | 0.08<br>4      |
| 165<br><input type="checkbox"/> | MA_M2F_0706_R | <a href="#">1451522_s_at</a> | <i>Lrch4</i>         | leucine-rich repeats and calponin homology (CH) domain containing 4; last exon and 3' UTR | Chr5: 137.640054 | 11.0<br>46 | 65 | 15.3 | Chr1: 163.338902  | -<br>0.11<br>1 |
| 166<br><input type="checkbox"/> | MA_M2F_0706_R | <a href="#">1423346_at</a>   | <i>Degs1</i>         | degenerative spermatocyte homolog 1; mid to distal 3' UTR                                 | Chr1: 182.276000 | 12.3<br>83 | 65 | 15.5 | Chr15: 91.405127  | 0.13<br>2      |
| 167<br><input type="checkbox"/> | MA_M2F_0706_R | <a href="#">1430129_a_at</a> | <i>Commd8</i>        | COMM domain containing 8; proximal 3' UTR                                                 | Chr5: 72.159618  | 10.2<br>80 | 65 | 11.0 | Chr4: 5.599068    | -<br>0.09<br>6 |
| 168<br><input type="checkbox"/> | MA_M2F_0706_R | <a href="#">1419352_at</a>   | <i>C11orf73</i>      | human chromosome 11 open reading frame 73; exons 2, 3, and 4                              | Chr7: 89.920136  | 10.5<br>03 | 65 | 18.7 | Chr7: 84.149847   | 0.14<br>4      |
| 169<br><input type="checkbox"/> | MA_M2F_0706_R | <a href="#">1455988_a_at</a> | <i>Cct6a</i>         | chaperonin subunit 6a (zeta); 3' UTR                                                      | Chr5: 129.845865 | 13.7<br>93 | 65 | 13.6 | Chr16: 74.917702  | -<br>0.07<br>1 |
| 170<br><input type="checkbox"/> | MA_M2F_0706_R | <a href="#">1420711_a_at</a> | <i>Pxmp3</i>         | peroxisomal membrane protein 3; only exon and proximal 3' UTR                             | Chr3: 5.560691   | 10.8<br>67 | 65 | 18.5 | Chr4: 96.896949   | 0.15<br>7      |
| 171<br><input type="checkbox"/> | MA_M2F_0706_R | <a href="#">1428328_at</a>   | <i>Nup50</i>         | nucleoporin 50; distal 3' UTR                                                             | Chr15: 84.942471 | 9.86<br>5  | 65 | 14.2 | Chr15: 91.405127  | 0.11<br>6      |
| 172<br><input type="checkbox"/> | MA_M2F_0706_R | <a href="#">1418000_a_at</a> | <i>Itm2b</i>         | integral membrane protein 2B; last four exons                                             | Chr14: 73.365788 | 16.7<br>11 | 65 | 13.5 | Chr14: 47.060301  | -<br>0.10<br>4 |
| 173<br><input type="checkbox"/> | MA_M2F_0706_R | <a href="#">1452172_at</a>   | <i>2810421I24Rik</i> | RIKEN cDNA 2810421I24 gene                                                                | Chr1: 63.748029  | 9.28<br>7  | 65 | 12.6 | Chr4: 96.896949   | 0.16<br>1      |
| 174<br><input type="checkbox"/> | MA_M2F_0706_R | <a href="#">1450112_a_at</a> | <i>Gas2</i>          | growth arrest specific 2                                                                  | Chr7: 51.993933  | 13.3<br>45 | 65 | 17.0 | Chr16: 74.899626  | -<br>0.13<br>6 |
| 175<br><input type="checkbox"/> | MA_M2F_0706_R | <a href="#">1415915_at</a>   | <i>Ddx1</i>          | DEAD (Asp-Glu-Ala-Asp) box polypeptide 1; last 4 exons and 3' UTR                         | Chr12: 13.219383 | 11.0<br>91 | 65 | 10.4 | Chr4: 121.044402  | 0.09<br>8      |
| 176<br><input type="checkbox"/> | MA_M2F_0706_R | <a href="#">1418929_at</a>   | <i>Ift57</i>         | intraflagellar transport 57 (estrogen-related receptor beta like 1); 4 exons and 3'UTR    | Chr16: 49.763742 | 9.32<br>3  | 65 | 15.2 | Chr6: 42.000000   | -<br>0.11<br>8 |
| 177<br><input type="checkbox"/> | MA_M2F_0706_R | <a href="#">1452203_at</a>   | <i>Obfc2a</i>        | oligonucleotide/oligosaccharide-binding fold; distal 3' UTR                               | Chr1: 51.469698  | 10.7<br>97 | 65 | 17.3 | Chr10: 116.134021 | -<br>0.16<br>7 |

|                                 |               |                              |                 |                                                                                                          |                   |            |    |      |                  |                |
|---------------------------------|---------------|------------------------------|-----------------|----------------------------------------------------------------------------------------------------------|-------------------|------------|----|------|------------------|----------------|
| 178<br><input type="checkbox"/> | MA_M2F_0706_R | <a href="#">1438425_at</a>   | <i>Gtf3c1</i>   | general transcription factor III C 1                                                                     | Chr7: 125.670486  | 7.08<br>5  | 65 | 11.0 | Chr15: 91.892917 | -<br>0.11<br>0 |
| 179<br><input type="checkbox"/> | MA_M2F_0706_R | <a href="#">1424013_at</a>   | <i>Etf1</i>     | eukaryotic translation termination factor 1; far 3' UTR                                                  | Chr18: 34.902978  | 10.8<br>23 | 65 | 8.6  | Chr3: 134.523036 | -<br>0.08<br>6 |
| 180<br><input type="checkbox"/> | MA_M2F_0706_R | <a href="#">1443754_x_at</a> | <i>Lsamp</i>    | limbic system-associated membrane protein; intron 1                                                      | Chr16: 41.667831  | 6.13<br>0  | 65 | 17.0 | Chr4: 78.900946  | -<br>0.09<br>4 |
| 181<br><input type="checkbox"/> | MA_M2F_0706_R | <a href="#">1421751_a_at</a> | <i>Psmd14</i>   | proteasome (prosome, macropain) 26S subunit, non-ATPase, 14; 2 exons and 3'UTR                           | Chr2: 61.799980   | 12.1<br>78 | 65 | 12.0 | Chr15: 91.892917 | 0.12<br>1      |
| 182<br><input type="checkbox"/> | MA_M2F_0706_R | <a href="#">1423505_at</a>   | <i>Tagln</i>    | transgelin; last two exons and 3' UTR                                                                    | Chr9: 45.930244   | 10.6<br>35 | 65 | 10.8 | Chr4: 75.824944  | -<br>0.16<br>7 |
| 183<br><input type="checkbox"/> | MA_M2F_0706_R | <a href="#">1424681_a_at</a> | <i>Psma5</i>    | proteasome (prosome, macropain) subunit, alpha type 5; putative exon (transQTL on Chr 4 in BXD eye data) | Chr3: 108.267833  | 11.2<br>33 | 65 | 11.1 | Chr8: 85.923280  | -<br>0.06<br>9 |
| 184<br><input type="checkbox"/> | MA_M2F_0706_R | <a href="#">1417018_at</a>   | <i>Efemp2</i>   | epidermal growth factor-containing fibulin-like extracellular matrix protein 2                           | Chr19: 5.480267   | 9.23<br>0  | 65 | 16.1 | Chr4: 78.900946  | -<br>0.15<br>1 |
| 185<br><input type="checkbox"/> | MA_M2F_0706_R | <a href="#">1452153_at</a>   | <i>Fbxo18</i>   | F-box protein 18                                                                                         | Chr2: 11.742673   | 10.2<br>59 | 65 | 12.2 | Chr15: 89.576205 | 0.08<br>2      |
| 186<br><input type="checkbox"/> | MA_M2F_0706_R | <a href="#">1423773_at</a>   | <i>Gpbp1</i>    | GC-rich promoter binding protein 1 (vascular wall-linked protein); last two exons and 3' UTR             | Chr13: 111.426379 | 11.0<br>02 | 65 | 15.0 | Chr9: 99.750326  | 0.11<br>8      |
| 187<br><input type="checkbox"/> | MA_M2F_0706_R | <a href="#">1434749_at</a>   | <i>BC067068</i> | cDNA sequence BC067068                                                                                   | Chr10: 105.763310 | 7.23<br>9  | 65 | 12.9 | Chr4: 78.900946  | 0.04<br>2      |
| 188<br><input type="checkbox"/> | MA_M2F_0706_R | <a href="#">1424283_at</a>   | <i>Jtb</i>      | jumping translocation breakpoint; exon 3, 4, 5, and 3' UTR                                               | Chr3: 90.235381   | 12.1<br>58 | 65 | 16.1 | Chr14: 49.074404 | 0.12<br>5      |
| 189<br><input type="checkbox"/> | MA_M2F_0706_R | <a href="#">1436665_a_at</a> | <i>Ltbp4</i>    | latent transforming growth factor beta binding protein 4; exons 31 and 32                                | Chr7: 27.306091   | 10.2<br>49 | 65 | 12.7 | Chr16: 74.899626 | 0.21<br>5      |
| 190<br><input type="checkbox"/> | MA_M2F_0706_R | <a href="#">1443830_x_at</a> | <i>Rnf103</i>   | ring finger protein 103; distal 3' UTR                                                                   | Chr6: 71.510731   | 8.72<br>7  | 65 | 14.1 | Chr16: 85.961783 | -<br>0.12<br>5 |
| 191<br><input type="checkbox"/> | MA_M2F_0706_R | <a href="#">1417594_at</a>   | <i>Gkap1</i>    | G kinase anchoring protein 1; last 5 exons and 3' UTR                                                    | Chr13: 58.233391  | 10.8<br>94 | 65 | 14.7 | Chr9: 99.750326  | 0.12<br>4      |
| 192<br><input type="checkbox"/> | MA_M2F_0706_R | <a href="#">1427605_at</a>   | <i>Hoxb3</i>    | homeo box B3                                                                                             | Chr11: 96.346583  | 8.98<br>3  | 65 | 16.1 | Chr4: 86.450967  | -<br>0.13<br>5 |

|                                 |               |                              |                      |                                                                                                                                                           |                  |            |    |      |                   |                |
|---------------------------------|---------------|------------------------------|----------------------|-----------------------------------------------------------------------------------------------------------------------------------------------------------|------------------|------------|----|------|-------------------|----------------|
| 193<br><input type="checkbox"/> | MA_M2F_0706_R | <a href="#">1449135_at</a>   | <i>Sox18</i>         | SRY-box containing gene 18                                                                                                                                | Chr2: 181.670065 | 9.16<br>2  | 65 | 12.3 | Chr16: 88.032782  | 0.10<br>4      |
| 194<br><input type="checkbox"/> | MA_M2F_0706_R | <a href="#">1420822_s_at</a> | <i>Sgpp1</i>         | sphingosine-1-phosphate phosphatase 1; distal 3' UTR                                                                                                      | Chr12: 75.714301 | 11.7<br>20 | 65 | 13.1 | Chr4: 155.493057  | 0.13<br>5      |
| 195<br><input type="checkbox"/> | MA_M2F_0706_R | <a href="#">1423517_at</a>   | <i>Cct6a</i>         | chaperonin subunit 6a (zeta)                                                                                                                              | Chr5: 129.845633 | 14.1<br>13 | 65 | 13.1 | Chr14: 107.221502 | -<br>0.06<br>7 |
| 196<br><input type="checkbox"/> | MA_M2F_0706_R | <a href="#">1419970_at</a>   | <i>Slc35a5</i>       | solute carrier family 35, member A5 (probable UDP-sugar transporter protein); mid 3' UTR                                                                  | Chr16: 45.141755 | 7.73<br>0  | 65 | 10.1 | Chr9: 105.774381  | -<br>0.11<br>9 |
| 197<br><input type="checkbox"/> | MA_M2F_0706_R | <a href="#">1451547_at</a>   | <i>Iyd</i>           | iodotyrosine deiodinase; 3' UTR                                                                                                                           | Chr10: 3.554323  | 11.2<br>25 | 65 | 14.9 | Chr14: 49.789692  | 0.16<br>6      |
| 198<br><input type="checkbox"/> | MA_M2F_0706_R | <a href="#">1438843_x_at</a> | <i>Mtch2</i>         | mitochondrial carrier homolog 2                                                                                                                           | Chr2: 90.861358  | 11.6<br>14 | 65 | 9.9  | Chr1: 191.333382  | -<br>0.06<br>6 |
| 199<br><input type="checkbox"/> | MA_M2F_0706_R | <a href="#">1448346_at</a>   | <i>Cfl1</i>          | cofilin 1 (non-muscle, 18 kDa phosphoprotein); last exon and proximal 3' UTR                                                                              | Chr19: 5.493442  | 12.7<br>60 | 65 | 14.2 | Chr6: 42.000000   | 0.21<br>3      |
| 200<br><input type="checkbox"/> | MA_M2F_0706_R | <a href="#">1415916_a_at</a> | <i>Mthfd1</i>        | methylenetetrahydrofolate dehydrogenase (NADP+ dependent), methenyltetrahydrofolate cyclohydrolase, formyltetrahydrofolate synthase; last exon and 3' UTR | Chr12: 76.317661 | 13.1<br>47 | 65 | 15.7 | Chr3: 129.482611  | -<br>0.15<br>5 |
| 201<br><input type="checkbox"/> | MA_M2F_0706_R | <a href="#">1452138_a_at</a> | <i>Ace2</i>          | angiotensin I converting enzyme (peptidyl-dipeptidase A) 2; last 2~6 and 11 exons                                                                         | ChrX: 164.167855 | 10.0<br>33 | 65 | 12.1 | Chr14: 3.000000   | 0.15<br>6      |
| 202<br><input type="checkbox"/> | MA_M2F_0706_R | <a href="#">1419984_s_at</a> | <i>Zfp644</i>        | zinc finger protein 644; mid to distal 3' UTR                                                                                                             | Chr5: 106.617110 | 9.82<br>8  | 65 | 12.3 | Chr11: 83.064807  | 0.11<br>1      |
| 203<br><input type="checkbox"/> | MA_M2F_0706_R | <a href="#">1424324_at</a>   | <i>A930014I12Rik</i> | RIKEN cDNA A930014I12 gene                                                                                                                                | Chr18: 10.566702 | 9.52<br>0  | 65 | 17.3 | Chr11: 83.064807  | 0.18<br>7      |
| 204<br><input type="checkbox"/> | MA_M2F_0706_R | <a href="#">1434682_at</a>   | <i>Zfp770</i>        | zinc finger protein 770; distal 3' UTR                                                                                                                    | Chr2: 114.193761 | 7.48<br>5  | 65 | 16.6 | Chr11: 83.064807  | 0.10<br>6      |
| 205<br><input type="checkbox"/> | MA_M2F_0706_R | <a href="#">1416653_at</a>   | <i>Stxbp3a</i>       | syntaxin binding protein 3a; proximal 3' UTR                                                                                                              | Chr3: 108.793540 | 9.53<br>6  | 65 | 8.2  | Chr8: 80.868085   | -<br>0.08<br>9 |
| 206<br><input type="checkbox"/> | MA_M2F_0706_R | <a href="#">1434607_at</a>   | <i>Ddx52</i>         | DEAD (Asp-Glu-Ala-Asp) box polypeptide 52                                                                                                                 | Chr11: 83.959487 | 7.08<br>3  | 65 | 13.2 | Chr14: 9.528965   | 0.18<br>7      |

|                                 |               |                              |                      |                                                                                                                                |                  |           |    |      |                  |                |
|---------------------------------|---------------|------------------------------|----------------------|--------------------------------------------------------------------------------------------------------------------------------|------------------|-----------|----|------|------------------|----------------|
| 207<br><input type="checkbox"/> | MA_M2F_0706_R | <a href="#">1425495_at</a>   | <i>Zfp62</i>         | zinc finger protein 62                                                                                                         | Chr11: 49.218192 | 6.71<br>2 | 65 | 18.6 | Chr14: 3.000000  | 0.19<br>3      |
| 208<br><input type="checkbox"/> | MA_M2F_0706_R | <a href="#">1434099_at</a>   | <i>Ppargc1a</i>      | peroxisome proliferative activated receptor, gamma, coactivator 1 alpha; far 3' UTR                                            | Chr5: 51.454320  | 9.15<br>7 | 65 | 11.1 | Chr1: 191.601182 | -<br>0.14<br>0 |
| 209<br><input type="checkbox"/> | MA_M2F_0706_R | <a href="#">1460258_at</a>   | <i>Lect1</i>         | leukocyte cell derived chemotaxin 1                                                                                            | Chr14: 79.637747 | 6.84<br>7 | 65 | 14.1 | Chr16: 3.500000  | 0.09<br>0      |
| 210<br><input type="checkbox"/> | MA_M2F_0706_R | <a href="#">1426473_at</a>   | <i>Dnajc9</i>        | DnaJ (Hsp40) homolog, subfamily C, member 9                                                                                    | Chr14: 20.385026 | 8.96<br>1 | 65 | 10.9 | Chr15: 68.818097 | -<br>0.09<br>4 |
| 211<br><input type="checkbox"/> | MA_M2F_0706_R | <a href="#">1417122_at</a>   | <i>Vav3</i>          | vav 3 oncogene (Rho family guanine nucleotide exchange factor); mid distal 3' UTR                                              | Chr3: 109.685110 | 8.00<br>2 | 65 | 9.6  | Chr7: 84.149847  | 0.15<br>6      |
| 212<br><input type="checkbox"/> | MA_M2F_0706_R | <a href="#">1452239_at</a>   | <i>Gt(ROSA)26Sor</i> | gene trap ROSA 26, Philippe Soriano (between Thumpd3 and Setd5); putative 3' end exon or 3' UTR, expressed even in normal mice | Chr6: 113.070606 | 7.08<br>2 | 65 | 13.9 | Chr11: 83.064807 | 0.19<br>3      |
| 213<br><input type="checkbox"/> | MA_M2F_0706_R | <a href="#">1449576_at</a>   | <i>Eif1ay</i>        | eukaryotic translation initiation factor 1A, Y-linked; distal 3' UTR                                                           | ChrX: 159.387418 | 8.48<br>9 | 65 | 12.8 | Chr14: 3.000000  | 0.12<br>5      |
| 214<br><input type="checkbox"/> | MA_M2F_0706_R | <a href="#">1452785_at</a>   | <i>C18orf55</i>      | human chromosome 18 open reading frame 55; last exons and 3' UTR (test Mendelian 10.86 in BXD)                                 | Chr18: 84.947626 | 9.57<br>1 | 65 | 14.0 | Chr14: 3.000000  | 0.13<br>2      |
| 215<br><input type="checkbox"/> | MA_M2F_0706_R | <a href="#">1452676_a_at</a> | <i>Pnpt1</i>         | polyribonucleotide nucleotidyltransferase 1; last four exons including proximal 3' UTR                                         | Chr11: 29.159348 | 9.38<br>8 | 65 | 15.7 | Chr11: 24.905498 | -<br>0.18<br>6 |
| 216<br><input type="checkbox"/> | MA_M2F_0706_R | <a href="#">1449960_at</a>   | <i>Nptx2</i>         | neuronal pentraxin 2; last exon and 3' UTR                                                                                     | Chr5: 144.556182 | 6.45<br>8 | 65 | 8.8  | Chr14: 19.755208 | 0.05<br>7      |
| 217<br><input type="checkbox"/> | MA_M2F_0706_R | <a href="#">1424642_at</a>   | <i>Thoc1</i>         | THO complex 1                                                                                                                  | Chr18: 9.992178  | 9.67<br>5 | 65 | 14.7 | Chr2: 181.014276 | 0.12<br>1      |
| 218<br><input type="checkbox"/> | MA_M2F_0706_R | <a href="#">1454826_at</a>   | <i>Zbtb11</i>        | zinc finger and BTB domain containing 11; 3' UTR                                                                               | Chr16: 56.008394 | 9.13<br>7 | 65 | 13.8 | Chr11: 83.064807 | 0.23<br>0      |
| 219<br><input type="checkbox"/> | MA_M2F_0706_R | <a href="#">1419641_at</a>   | <i>Purb</i>          | purine rich element binding protein B                                                                                          | Chr11: 6.473439  | 9.15<br>2 | 65 | 16.5 | Chr14: 3.000000  | 0.19<br>1      |
| 220<br><input type="checkbox"/> | MA_M2F_0706_R | <a href="#">1428551_at</a>   | <i>Trmt11</i>        | tRNA methyltransferase 11                                                                                                      | Chr10: 30.534740 | 7.83<br>3 | 65 | 12.8 | Chr11: 83.064807 | 0.11<br>6      |

|          |               |                              |                 |                                                                                                    |                  |            |    |      |                  |                |
|----------|---------------|------------------------------|-----------------|----------------------------------------------------------------------------------------------------|------------------|------------|----|------|------------------|----------------|
|          |               |                              |                 | homolog; last 2 exons and 3' UTR                                                                   |                  |            |    |      |                  |                |
| 221<br>☐ | MA_M2F_0706_R | <a href="#">1435947_at</a>   | <i>Stmn4</i>    | stathmin-like 4                                                                                    | Chr19: 23.728467 | 8.26<br>2  | 65 | 17.2 | Chr14: 9.528965  | 0.23<br>8      |
| 222<br>☐ | MA_M2F_0706_R | <a href="#">1419089_at</a>   | <i>Timp3</i>    | tissue inhibitor of metalloproteinase 3                                                            | Chr10: 86.347860 | 14.4<br>42 | 65 | 15.7 | Chr14: 19.755208 | -<br>0.14<br>9 |
| 223<br>☐ | MA_M2F_0706_R | <a href="#">1460430_at</a>   | <i>Rap2c</i>    | RAP2C, member of RAS oncogene family                                                               | ChrX: 51.004526  | 8.21<br>0  | 65 | 13.6 | Chr14: 3.000000  | 0.18<br>3      |
| 224<br>☐ | MA_M2F_0706_R | <a href="#">1454917_at</a>   | <i>AU045404</i> | expressed sequence AU045404                                                                        | Chr15: 90.232891 | 8.79<br>7  | 65 | 14.2 | Chr14: 9.528965  | 0.13<br>0      |
| 225<br>☐ | MA_M2F_0706_R | <a href="#">1434719_at</a>   | <i>A2m</i>      | alpha-2-macroglobulin; last 7 exons except last exon                                               | Chr6: 121.674940 | 6.85<br>9  | 65 | 7.9  | Chr14: 19.755208 | -<br>0.07<br>7 |
| 226<br>☐ | MA_M2F_0706_R | <a href="#">1428829_at</a>   | <i>Dennd1b</i>  | DENN/MADD domain containing 1B; putative far 3' UTR                                                | Chr1: 139.175456 | 9.16<br>5  | 65 | 13.4 | Chr14: 9.528965  | 0.18<br>6      |
| 227<br>☐ | MA_M2F_0706_R | <a href="#">1418817_at</a>   | <i>Chmp1b</i>   | chromatin modifying protein 1B                                                                     | Chr18: 67.207239 | 10.0<br>45 | 65 | 14.9 | Chr14: 27.000000 | 0.20<br>5      |
| 228<br>☐ | MA_M2F_0706_R | <a href="#">1418222_at</a>   | <i>Noa1</i>     | nitric oxide associated 1; 4 exons                                                                 | Chr5: 77.294479  | 8.94<br>8  | 65 | 11.1 | Chr7: 66.458029  | 0.13<br>6      |
| 229<br>☐ | MA_M2F_0706_R | <a href="#">1417438_at</a>   | <i>Rdh14</i>    | retinol dehydrogenase 14 (all-trans and 9-cis)                                                     | Chr12: 10.395066 | 10.5<br>54 | 65 | 9.9  | ChrX: 64.161107  | -<br>0.11<br>9 |
| 230<br>☐ | MA_M2F_0706_R | <a href="#">1446349_at</a>   | <i>Zfp78</i>    | zinc finger protein 78; extreme distal 3' UTR                                                      | Chr7: 6.380471   | 7.23<br>2  | 65 | 14.5 | Chr8: 24.382366  | 0.07<br>9      |
| 231<br>☐ | MA_M2F_0706_R | <a href="#">1435828_at</a>   | <i>Maf</i>      | musculoaponeurotic fibrosarcoma (v-maf) AS42 transcription factor proto-oncogene; distal 3' UTR    | Chr8: 115.683054 | 8.04<br>8  | 65 | 9.9  | Chr14: 19.755208 | 0.15<br>5      |
| 232<br>☐ | MA_M2F_0706_R | <a href="#">1460168_at</a>   | <i>Slbp</i>     | stem-loop binding protein                                                                          | Chr5: 143.099261 | 9.69<br>1  | 65 | 12.8 | ChrX: 70.094108  | -<br>0.15<br>8 |
| 233<br>☐ | MA_M2F_0706_R | <a href="#">1421968_a_at</a> | <i>Nipa2</i>    | non imprinted in Prader-Willi/Angelman syndrome 2 homolog (human)                                  | Chr7: 55.932659  | 8.27<br>1  | 65 | 14.7 | Chr14: 3.000000  | 0.22<br>0      |
| 234<br>☐ | MA_M2F_0706_R | <a href="#">1452090_a_at</a> | <i>Olfm3</i>    | olfactomedin 3; distal 3' UTR                                                                      | Chr3: 115.124528 | 7.78<br>3  | 65 | 11.2 | Chr14: 30.957748 | 0.23<br>4      |
| 235<br>☐ | MA_M2F_0706_R | <a href="#">1418640_at</a>   | <i>Sirt1</i>    | sirtuin 1, NAD+ dependent histone deacetylase, class 1 (longevity, caloric restriction associated, | Chr10: 63.319162 | 8.83<br>7  | 65 | 12.8 | Chr14: 3.000000  | 0.22<br>7      |

|          |               |                              |                      |                                                                    |                  |        |    |      |                   |        |
|----------|---------------|------------------------------|----------------------|--------------------------------------------------------------------|------------------|--------|----|------|-------------------|--------|
|          |               |                              |                      | mitochondrial biogenesis, cell survival); distal 3' UTR            |                  |        |    |      |                   |        |
| 236<br>☐ | MA_M2F_0706_R | <a href="#">1419462_s_at</a> | <i>Gtl3</i>          | gene trap locus 3                                                  | Chr8: 95.420551  | 8.746  | 65 | 14.9 | Chr8: 94.374289   | -0.212 |
| 237<br>☐ | MA_M2F_0706_R | <a href="#">1448896_at</a>   | <i>Pigf</i>          | phosphatidylinositol glycan, class F                               | Chr17: 86.997281 | 9.622  | 65 | 13.3 | Chr11: 83.064807  | 0.156  |
| 238<br>☐ | MA_M2F_0706_R | <a href="#">1439334_at</a>   | <i>A330009G12</i>    | ESTs                                                               | ChrX: 141.727603 | 5.533  | 65 | 10.8 | Chr14: 9.528965   | 0.036  |
| 239<br>☐ | MA_M2F_0706_R | <a href="#">1435893_at</a>   | <i>Vldlr</i>         | very low density lipoprotein receptor; putative far 3' UTR         | Chr19: 27.253653 | 9.829  | 65 | 15.9 | Chr11: 83.064807  | 0.183  |
| 240<br>☐ | MA_M2F_0706_R | <a href="#">1429121_at</a>   | <i>4921517N04Rik</i> | RIKEN cDNA 4921517N04 gene                                         | Chr2: 23.510873  | 6.403  | 65 | 13.8 | Chr11: 83.064807  | 0.126  |
| 241<br>☐ | MA_M2F_0706_R | <a href="#">1448555_at</a>   | <i>D15Ert682e</i>    | DNA segment, Chr 15, ERATO Doi 682, expressed                      | Chr15: 97.678396 | 8.509  | 65 | 12.8 | Chr14: 9.528965   | 0.122  |
| 242<br>☐ | MA_M2F_0706_R | <a href="#">1429351_at</a>   | <i>Klhl24</i>        | kelch-like 24; mid 3' UTR                                          | Chr16: 20.124883 | 10.148 | 65 | 9.3  | Chr13: 115.551768 | -0.190 |
| 243<br>☐ | MA_M2F_0706_R | <a href="#">1455973_at</a>   | <i>BB738659</i>      | ESTs                                                               | Chr11: 9.068785  | 6.793  | 65 | 13.0 | Chr11: 9.165457   | -0.252 |
| 244<br>☐ | MA_M2F_0706_R | <a href="#">1459712_at</a>   | <i>Zfp182</i>        | zinc finger protein 182                                            | ChrX: 21.026222  | 5.703  | 65 | 11.3 | Chr14: 3.000000   | 0.048  |
| 245<br>☐ | MA_M2F_0706_R | <a href="#">1440742_at</a>   | <i>LOC239447</i>     | ESTs                                                               | Chr18: 6.491461  | 6.615  | 65 | 14.6 | Chr14: 19.755208  | 0.103  |
| 246<br>☐ | MA_M2F_0706_R | <a href="#">1428652_at</a>   | <i>0610010F05Rik</i> | RIKEN cDNA 0610010F05; distal 3' UTR                               | Chr11: 23.573924 | 8.242  | 65 | 14.3 | Chr14: 9.528965   | 0.189  |
| 247<br>☐ | MA_M2F_0706_R | <a href="#">1434404_at</a>   | <i>Fam73a</i>        | family with sequence similarity 73, member A                       | Chr3: 152.274018 | 7.884  | 65 | 13.8 | Chr14: 3.000000   | 0.145  |
| 248<br>☐ | MA_M2F_0706_R | <a href="#">1454740_at</a>   | <i>Mib1</i>          | mindbomb homolog 1; possible far 3' UTR                            | Chr18: 10.817206 | 9.656  | 65 | 12.4 | Chr14: 3.000000   | 0.238  |
| 249<br>☐ | MA_M2F_0706_R | <a href="#">1448922_at</a>   | <i>Dusp19</i>        | dual specificity phosphatase 19                                    | Chr2: 80.621210  | 7.162  | 65 | 15.1 | Chr14: 24.000000  | 0.153  |
| 250<br>☐ | MA_M2F_0706_R | <a href="#">1434628_a_at</a> | <i>Rhpn2</i>         | rhophilin, Rho GTPase binding protein 2                            | Chr7: 35.391927  | 6.973  | 65 | 9.8  | Chr14: 3.000000   | 0.174  |
| 251<br>☐ | MA_M2F_0706_R | <a href="#">1435769_at</a>   | <i>Akap9</i>         | A kinase (PRKA) anchor protein (yotiao) 9; last 2 exons and 3' UTR | Chr5: 4.077940   | 9.524  | 65 | 10.0 | Chr8: 80.868085   | -0.089 |



|                                 |               |                              |                 |                                                                                                                                                         |                  |        |    |      |                  |        |
|---------------------------------|---------------|------------------------------|-----------------|---------------------------------------------------------------------------------------------------------------------------------------------------------|------------------|--------|----|------|------------------|--------|
| 252<br><input type="checkbox"/> | MA_M2F_0706_R | <a href="#">1426476_at</a>   | <i>Rasa1</i>    | RAS p21 protein activator (GTPase activating protein) 1; mid 3' UTR                                                                                     | Chr13: 85.215413 | 9.256  | 65 | 13.4 | Chr14: 19.755208 | 0.203  |
| 253<br><input type="checkbox"/> | MA_M2F_0706_R | <a href="#">1449658_at</a>   | <i>AA536748</i> | AA536748                                                                                                                                                | Chr5: 49.657134  | 5.759  | 65 | 13.7 | Chr4: 102.851020 | 0.037  |
| 254<br><input type="checkbox"/> | MA_M2F_0706_R | <a href="#">1421022_x_at</a> | <i>Acyp1</i>    | acylphosphatase 1, erythrocyte (common) type                                                                                                            | Chr12: 85.272453 | 10.369 | 65 | 12.6 | Chr4: 96.896949  | 0.180  |
| 255<br><input type="checkbox"/> | MA_M2F_0706_R | <a href="#">1439266_a_at</a> | <i>Polr3k</i>   | polymerase (RNA) III (DNA directed) polypeptide K                                                                                                       | Chr2: 181.868495 | 7.426  | 65 | 16.2 | Chr14: 19.755208 | 0.207  |
| 256<br><input type="checkbox"/> | MA_M2F_0706_R | <a href="#">1428985_at</a>   | <i>Ints12</i>   | integrator complex subunit 12; distal 3' UTR                                                                                                            | Chr3: 133.110469 | 8.464  | 65 | 12.5 | Chr14: 9.528965  | 0.257  |
| 257<br><input type="checkbox"/> | MA_M2F_0706_R | <a href="#">1456744_x_at</a> | <i>Flcn</i>     | folliculin; distal 3'UTR                                                                                                                                | Chr11: 59.791771 | 5.895  | 65 | 12.4 | Chr11: 83.064807 | 0.059  |
| 258<br><input type="checkbox"/> | MA_M2F_0706_R | <a href="#">1435529_at</a>   | <i>Ifit1</i>    | interferon-induced protein with tetratricopeptide repeats 1 related sequence, OTTMUSG00000016644; 3' UTR of Ifit1-related sequence (from 2010002M12Rik) | Chr19: 34.593014 | 7.121  | 65 | 16.6 | Chr14: 19.755208 | 0.150  |
| 259<br><input type="checkbox"/> | MA_M2F_0706_R | <a href="#">1427197_at</a>   | <i>Atr</i>      | ataxia telangiectasia and rad3 related; last four coding exons                                                                                          | Chr9: 95.945370  | 7.738  | 65 | 12.3 | Chr3: 39.650830  | -0.160 |
| 260<br><input type="checkbox"/> | MA_M2F_0706_R | <a href="#">1417319_at</a>   | <i>Pvrl3</i>    | poliovirus receptor-related 3                                                                                                                           | Chr16: 46.447261 | 8.254  | 65 | 14.6 | Chr14: 24.000000 | 0.192  |
| 261<br><input type="checkbox"/> | MA_M2F_0706_R | <a href="#">1417077_at</a>   | <i>Bcap29</i>   | B-cell receptor-associated protein 29; mid 3' UTR                                                                                                       | Chr12: 31.595531 | 8.748  | 65 | 9.4  | Chr10: 55.515150 | -0.222 |
| 262<br><input type="checkbox"/> | MA_M2F_0706_R | <a href="#">1453282_at</a>   | <i>Cxadr</i>    | coxsackievirus and adenovirus receptor                                                                                                                  | Chr16: 78.339777 | 8.041  | 65 | 13.1 | Chr14: 19.755208 | 0.144  |
| 263<br><input type="checkbox"/> | MA_M2F_0706_R | <a href="#">1433823_at</a>   | <i>AW456874</i> | expressed sequence AW456874                                                                                                                             | Chr13: 48.578313 | 6.592  | 65 | 13.5 | Chr8: 3.500000   | 0.124  |
| 264<br><input type="checkbox"/> | MA_M2F_0706_R | <a href="#">1424230_at</a>   | <i>Exoc6</i>    | exocyst complex component 6                                                                                                                             | Chr19: 37.682952 | 8.747  | 65 | 13.8 | ChrX: 61.058643  | -0.143 |
| 265<br><input type="checkbox"/> | MA_M2F_0706_R | <a href="#">1417704_a_at</a> | <i>Arhgap6</i>  | Rho GTPase activating protein 6                                                                                                                         | ChrX: 169.303893 | 6.311  | 65 | 11.3 | Chr8: 94.374289  | -0.070 |
| 266<br><input type="checkbox"/> | MA_M2F_0706_R | <a href="#">1432094_a_at</a> | <i>Vps50</i>    | VPS50 EARP/GARPII complex subunit; last two exons and 3' UTR                                                                                            | Chr6: 3.600215   | 9.359  | 65 | 12.4 | ChrX: 64.161107  | -0.205 |

|          |               |                              |                       |                                                                                                                           |                   |           |    |      |                  |                |
|----------|---------------|------------------------------|-----------------------|---------------------------------------------------------------------------------------------------------------------------|-------------------|-----------|----|------|------------------|----------------|
| 267<br>☐ | MA_M2F_0706_R | <a href="#">1435116_at</a>   | <i>Kiaa1383</i>       | KIAA1383, RIKEN cDNA 4933403G14; 3' UTR                                                                                   | Chr8: 125.672794  | 6.19<br>1 | 65 | 12.1 | Chr14: 9.528965  | 0.08<br>8      |
| 268<br>☐ | MA_M2F_0706_R | <a href="#">1420340_at</a>   | <i>Cspp1</i>          | centrosome and spindle pole associated protein 1; mid 3' UTR of long form                                                 | Chr1: 10.067376   | 5.79<br>8 | 65 | 10.4 | Chr18: 68.185097 | 0.03<br>7      |
| 269<br>☐ | MA_M2F_0706_R | <a href="#">1424075_at</a>   | <i>9430016 H08Rik</i> | hypothetical protein LOC79568; last three exons                                                                           | Chr1: 57.411776   | 8.93<br>7 | 65 | 15.6 | Chr4: 96.896949  | 0.17<br>4      |
| 270<br>☐ | MA_M2F_0706_R | <a href="#">1446471_at</a>   | <i>B130066 H01Rik</i> | 15 days embryo head cDNA, RIKEN full-length enriched library, clone:D930045O10 product:unknown EST, full insert sequence. | Chr7: 129.649450  | 7.06<br>1 | 65 | 23.2 | Chr14: 9.528965  | -<br>0.06<br>8 |
| 271<br>☐ | MA_M2F_0706_R | <a href="#">1435938_at</a>   | <i>2610318 C08Rik</i> | RIKEN cDNA 2610318C08 gene                                                                                                | Chr2: 129.268259  | 8.39<br>2 | 65 | 17.5 | Chr2: 134.519309 | -<br>0.09<br>8 |
| 272<br>☐ | MA_M2F_0706_R | <a href="#">1435127_a_at</a> | <i>Osgepl1</i>        | O-sialoglycoprotein endopeptidase-like 1                                                                                  | Chr1: 53.320085   | 9.39<br>1 | 65 | 10.8 | Chr16: 3.500000  | -<br>0.11<br>5 |
| 273<br>☐ | MA_M2F_0706_R | <a href="#">1448653_at</a>   | <i>Eed</i>            | embryonic ectoderm development (polycomb repressive complex 2 member); last three exons and 3' UTR                        | Chr7: 89.954826   | 9.60<br>1 | 65 | 16.4 | Chr7: 73.746984  | 0.24<br>0      |
| 274<br>☐ | MA_M2F_0706_R | <a href="#">1423131_at</a>   | <i>Tnip1</i>          | TGF beta-inducible nuclear protein 1; far 3' UTR                                                                          | Chr13: 97.129610  | 9.35<br>6 | 65 | 10.0 | Chr14: 24.000000 | 0.16<br>5      |
| 275<br>☐ | MA_M2F_0706_R | <a href="#">1424641_a_at</a> | <i>Thoc1</i>          | THO complex 1                                                                                                             | Chr18: 9.993531   | 7.37<br>1 | 65 | 11.8 | Chr14: 19.755208 | 0.28<br>0      |
| 276<br>☐ | MA_M2F_0706_R | <a href="#">1450418_a_at</a> | <i>Yipf4</i>          | Yip1 domain family, member 4; 3' UTR                                                                                      | Chr17: 74.499383  | 9.19<br>9 | 65 | 10.1 | Chr7: 84.149847  | 0.14<br>0      |
| 277<br>☐ | MA_M2F_0706_R | <a href="#">1417769_at</a>   | <i>Psmc6</i>          | proteasome (prosome, macropain) 26S subunit, ATPase, 6; far 3' UTR                                                        | Chr14: 45.349105  | 6.74<br>6 | 65 | 11.3 | Chr17: 10.720847 | -<br>0.17<br>5 |
| 278<br>☐ | MA_M2F_0706_R | <a href="#">1426015_s_at</a> | <i>Asph</i>           | aspartate-beta-hydroxylase                                                                                                | Chr4: 9.575561    | 9.87<br>7 | 65 | 8.7  | Chr11: 93.000000 | 0.16<br>3      |
| 279<br>☐ | MA_M2F_0706_R | <a href="#">1417861_at</a>   | <i>Ccnc</i>           | cyclin C; distal 3' UTR                                                                                                   | Chr4: 21.749997   | 6.74<br>2 | 65 | 12.5 | Chr14: 19.755208 | 0.13<br>3      |
| 280<br>☐ | MA_M2F_0706_R | <a href="#">1434284_at</a>   | <i>Bdp1</i>           | B double prime 1, subunit of RNA polymerase III transcription initiation factor IIIB; distal 3' UTR                       | Chr13: 100.018106 | 9.30<br>9 | 65 | 12.9 | Chr14: 9.528965  | 0.14<br>3      |

|                                 |               |                              |                      |                                                                                                                     |                   |        |    |      |                   |        |
|---------------------------------|---------------|------------------------------|----------------------|---------------------------------------------------------------------------------------------------------------------|-------------------|--------|----|------|-------------------|--------|
| 281<br><input type="checkbox"/> | MA_M2F_0706_R | <a href="#">1459885_s_at</a> | <i>Cox7c</i>         | cytochrome c oxidase, subunit VIIc                                                                                  | Chr13: 86.044921  | 6.580  | 65 | 16.9 | ChrX: 42.981911   | -0.096 |
| 282<br><input type="checkbox"/> | MA_M2F_0706_R | <a href="#">1423612_at</a>   | <i>Clp1</i>          | ATP/GTP-binding protein; last exon and proximal 3' UTR                                                              | Chr2: 84.723372   | 8.531  | 65 | 14.8 | Chr2: 134.800968  | 0.158  |
| 283<br><input type="checkbox"/> | MA_M2F_0706_R | <a href="#">1452385_at</a>   | <i>Usp53</i>         | ubiquitin specific protease 53                                                                                      | Chr3: 122.931918  | 6.647  | 65 | 13.8 | Chr14: 114.751225 | 0.175  |
| 284<br><input type="checkbox"/> | MA_M2F_0706_R | <a href="#">1415981_at</a>   | <i>Herpud2</i>       | HERPUD family member 2; 3' UTR                                                                                      | Chr9: 25.108158   | 10.215 | 65 | 10.7 | Chr11: 83.064807  | 0.156  |
| 285<br><input type="checkbox"/> | MA_M2F_0706_R | <a href="#">1420390_s_at</a> | <i>Zfp354a</i>       | zinc finger protein 354A; proximal 3' UTR                                                                           | Chr11: 51.070706  | 6.468  | 65 | 16.0 | Chr7: 73.746984   | 0.077  |
| 286<br><input type="checkbox"/> | MA_M2F_0706_R | <a href="#">1418651_at</a>   | <i>Spata6</i>        | spermatogenesis associated 6                                                                                        | Chr4: 111.828580  | 8.411  | 65 | 10.5 | Chr16: 3.500000   | -0.097 |
| 287<br><input type="checkbox"/> | MA_M2F_0706_R | <a href="#">1416856_at</a>   | <i>C20orf111</i>     | oxidative stress responsive 1 (peroxide-inducible transcript 1, human chromosome 20 open reading frame 111); 3' UTR | Chr2: 163.405836  | 10.353 | 65 | 12.7 | Chr11: 83.064807  | 0.138  |
| 288<br><input type="checkbox"/> | MA_M2F_0706_R | <a href="#">1452256_at</a>   | <i>1110002N22Rik</i> | RIKEN cDNA 1110002N22 (hydrolase); last exon                                                                        | Chr11: 80.136947  | 8.639  | 65 | 11.0 | Chr14: 24.000000  | 0.149  |
| 289<br><input type="checkbox"/> | MA_M2F_0706_R | <a href="#">1454136_a_at</a> | <i>C16orf87</i>      | human chromosome 16 open reading frame 87; mid distal 3' UTR                                                        | Chr8: 85.409136   | 8.866  | 65 | 25.9 | Chr8: 81.951757   | -0.315 |
| 290<br><input type="checkbox"/> | MA_M2F_0706_R | <a href="#">1421014_a_at</a> | <i>Clybl</i>         | citrate lyase beta like; exons 5 and 6                                                                              | Chr14: 122.379201 | 10.975 | 65 | 15.8 | Chr4: 102.851020  | 0.188  |
| 291<br><input type="checkbox"/> | MA_M2F_0706_R | <a href="#">1448979_at</a>   | <i>Muted</i>         | muted                                                                                                               | Chr13: 38.602741  | 9.480  | 65 | 15.7 | Chr14: 9.528965   | 0.142  |
| 292<br><input type="checkbox"/> | MA_M2F_0706_R | <a href="#">1428772_at</a>   | <i>Tbk1</i>          | TANK-binding kinase 1; distal 3'UTR                                                                                 | Chr10: 121.587538 | 9.799  | 65 | 9.5  | Chr10: 121.639039 | 0.157  |
| 293<br><input type="checkbox"/> | MA_M2F_0706_R | <a href="#">1425476_at</a>   | <i>Col4a5</i>        | procollagen, type IV, alpha 5                                                                                       | ChrX: 141.688618  | 10.329 | 65 | 16.7 | Chr14: 24.000000  | 0.204  |
| 294<br><input type="checkbox"/> | MA_M2F_0706_R | <a href="#">1424372_at</a>   | <i>Mrpl32</i>        | mitochondrial ribosomal protein L32                                                                                 | Chr13: 14.610401  | 11.353 | 65 | 19.8 | Chr8: 75.681677   | -0.120 |
| 295<br><input type="checkbox"/> | MA_M2F_0706_R | <a href="#">1451133_s_at</a> | <i>8430437G11Rik</i> | RIKEN cDNA 8430437G11 gene                                                                                          | Chr6: 13.581615   | 8.029  | 65 | 12.9 | Chr14: 3.000000   | 0.121  |
| 296<br><input type="checkbox"/> | MA_M2F_0706_R | <a href="#">1426494_at</a>   | <i>Rg9mtd3</i>       | RNA (guanine-9-) methyltransferase domain containing 3                                                              | Chr4: 45.307913   | 7.507  | 65 | 23.8 | Chr14: 9.528965   | 0.205  |

|                                 |               |                              |                       |                                                                                                                  |                   |            |    |      |                   |            |
|---------------------------------|---------------|------------------------------|-----------------------|------------------------------------------------------------------------------------------------------------------|-------------------|------------|----|------|-------------------|------------|
| 297<br><input type="checkbox"/> | MA_M2F_0706_R | <a href="#">1440799_s_at</a> | <i>Farp2</i>          | FERM, RhoGEF and pleckstrin domain protein 2; distal 3' UTR and antisense of the long Stk25                      | Chr1: 93.621605   | 6.95<br>3  | 65 | 13.0 | Chr6: 42.000000   | -<br>0.215 |
| 298<br><input type="checkbox"/> | MA_M2F_0706_R | <a href="#">1442836_at</a>   | <i>Xpo7</i>           | exportin 7                                                                                                       | Chr14: 70.680650  | 5.59<br>8  | 65 | 10.4 | Chr13: 115.551768 | -<br>0.034 |
| 299<br><input type="checkbox"/> | MA_M2F_0706_R | <a href="#">1454766_at</a>   | <i>Amn1</i>           | antagonist of mitotic exit network 1; last four exons                                                            | Chr6: 149.157710  | 7.87<br>2  | 65 | 13.4 | ChrX: 73.428893   | -<br>0.211 |
| 300<br><input type="checkbox"/> | MA_M2F_0706_R | <a href="#">1428616_at</a>   | <i>Zfp131</i>         | zinc finger protein 131; distal 3' UTR                                                                           | Chr13: 119.481127 | 9.07<br>4  | 65 | 12.4 | Chr19: 28.714120  | -<br>0.169 |
| 301<br><input type="checkbox"/> | MA_M2F_0706_R | <a href="#">1454947_a_at</a> | <i>Ub1cp1</i>         | ubiquitin-like domain containing CTD phosphatase 1; distal 3' UTR                                                | Chr11: 44.454597  | 10.0<br>71 | 65 | 10.3 | Chr1: 95.094462   | 0.14<br>1  |
| 302<br><input type="checkbox"/> | MA_M2F_0706_R | <a href="#">1426523_a_at</a> | <i>Gnpda2</i>         | glucosamine-6-phosphate deaminase 2; exons 4, 6 (last), and proximal 3' UTR                                      | Chr5: 69.575857   | 8.16<br>3  | 65 | 13.4 | Chr14: 3.000000   | 0.29<br>9  |
| 303<br><input type="checkbox"/> | MA_M2F_0706_R | <a href="#">1448712_at</a>   | <i>Chm</i>            | choroideremia; mid 3'UTR                                                                                         | ChrX: 113.041468  | 8.54<br>4  | 65 | 14.2 | Chr14: 9.528965   | 0.17<br>5  |
| 304<br><input type="checkbox"/> | MA_M2F_0706_R | <a href="#">1424318_at</a>   | <i>Hspc159</i>        | galectin-related protein (protein LOC29094); distal 3' UTR                                                       | Chr11: 20.823747  | 9.92<br>6  | 65 | 11.1 | Chr11: 82.187018  | 0.14<br>2  |
| 305<br><input type="checkbox"/> | MA_M2F_0706_R | <a href="#">1418048_at</a>   | <i>1110059 G10Rik</i> | RIKEN cDNA 1110059G10 gene                                                                                       | Chr9: 122.947701  | 10.5<br>25 | 65 | 16.5 | Chr11: 83.064807  | 0.15<br>2  |
| 306<br><input type="checkbox"/> | MA_M2F_0706_R | <a href="#">1434910_at</a>   | <i>CXorf23</i>        | human chromosome X open reading frame 23; distal half of 3' UTR                                                  | ChrX: 159.592515  | 7.46<br>2  | 65 | 16.5 | Chr14: 9.528965   | 0.16<br>0  |
| 307<br><input type="checkbox"/> | MA_M2F_0706_R | <a href="#">1454064_a_at</a> | <i>Rnf138</i>         | ring finger protein 138; mid 3' UTR                                                                              | Chr18: 21.026824  | 8.39<br>7  | 65 | 13.0 | Chr14: 24.000000  | 0.17<br>9  |
| 308<br><input type="checkbox"/> | MA_M2F_0706_R | <a href="#">1417140_a_at</a> | <i>Ptpn2</i>          | protein tyrosine phosphatase, non-receptor type 2; last exon and 3' UTR                                          | Chr18: 67.665655  | 8.71<br>9  | 65 | 14.9 | Chr14: 9.528965   | 0.14<br>7  |
| 309<br><input type="checkbox"/> | MA_M2F_0706_R | <a href="#">1424589_s_at</a> | <i>Rnpc3</i>          | RNA-binding region (RNP1, RRM) containing 3; last four exons                                                     | Chr3: 113.609053  | 6.36<br>4  | 65 | 9.3  | Chr8: 88.711457   | -<br>0.077 |
| 310<br><input type="checkbox"/> | MA_M2F_0706_R | <a href="#">1419241_a_at</a> | <i>Aire</i>           | autoimmune regulator (autoimmune polyendocrinopathy candidiasis ectodermal dystrophy); last two exons and 3' UTR | Chr10: 78.030046  | 7.88<br>1  | 65 | 16.9 | Chr14: 9.528965   | -<br>0.110 |

|          |               |                              |                       |                                                                                                                                |                  |        |    |      |                  |        |
|----------|---------------|------------------------------|-----------------------|--------------------------------------------------------------------------------------------------------------------------------|------------------|--------|----|------|------------------|--------|
| 311<br>☐ | MA_M2F_0706_R | <a href="#">1427016_at</a>   | <i>Kiaa1109</i>       | transmembrane protein KIAA1109; last exon and proximal to mid 3' UTR                                                           | Chr3: 37.052439  | 9.507  | 65 | 9.9  | Chr11: 83.064807 | 0.189  |
| 312<br>☐ | MA_M2F_0706_R | <a href="#">1447124_at</a>   | <i>Gal3st2</i>        | galactose 3-O-sulfotransferase 2 region; probes in region with segmental duplication                                           | Chr1: 93.858131  | 10.833 | 65 | 13.2 | Chr7: 84.149847  | -0.147 |
| 313<br>☐ | MA_M2F_0706_R | <a href="#">1421888_x_at</a> | <i>Aplp2</i>          | amyloid beta (A4) precursor-like protein 2; distal 3' UTR                                                                      | Chr9: 31.149603  | 10.659 | 65 | 10.2 | Chr3: 39.650830  | 0.074  |
| 314<br>☐ | MA_M2F_0706_R | <a href="#">1438903_at</a>   | <i>Maea</i>           | Mus musculus transcribed sequence                                                                                              | --               | 6.324  | 65 | 15.0 | Chr4: 107.548653 | 0.065  |
| 315<br>☐ | MA_M2F_0706_R | <a href="#">1452126_at</a>   | <i>Zfp160</i>         | zinc finger protein 160                                                                                                        | Chr17: 21.028146 | 7.362  | 65 | 17.5 | Chr14: 9.528965  | 0.136  |
| 316<br>☐ | MA_M2F_0706_R | <a href="#">1449090_a_at</a> | <i>Yes1</i>           | Yamaguchi sarcoma viral (v-yes) oncogene homolog 1; distal 3' UTR                                                              | Chr5: 32.686555  | 7.483  | 65 | 9.3  | Chr13: 7.000000  | 0.152  |
| 317<br>☐ | MA_M2F_0706_R | <a href="#">1428427_at</a>   | <i>Fbxl2</i>          | F-box and leucine-rich repeat protein 2; proximal 3' UTR                                                                       | Chr9: 113.978252 | 6.140  | 65 | 16.7 | ChrX: 73.428893  | -0.053 |
| 318<br>☐ | MA_M2F_0706_R | <a href="#">1417399_at</a>   | <i>Gas6</i>           | growth arrest specific 6 (Axl ligand); last 2 exons and 3' UTR                                                                 | Chr8: 13.465414  | 13.763 | 65 | 11.7 | Chr9: 99.750326  | -0.146 |
| 319<br>☐ | MA_M2F_0706_R | <a href="#">1426269_at</a>   | <i>Sybl1</i>          | synaptobrevin like 1 (pseudautosomal region); distal 3' UTR                                                                    | ChrX: 1.000000   | 10.834 | 65 | 9.4  | Chr16: 3.500000  | -0.152 |
| 320<br>☐ | MA_M2F_0706_R | <a href="#">1429376_s_at</a> | <i>Anapc10</i>        | anaphase promoting complex subunit 10                                                                                          | Chr8: 79.729186  | 9.142  | 65 | 15.3 | Chr14: 19.755208 | 0.196  |
| 321<br>☐ | MA_M2F_0706_R | <a href="#">1428078_at</a>   | <i>0610013 E23Rik</i> | RIKEN cDNA 0610013E23; proximal 3' UTR                                                                                         | Chr11: 86.495970 | 9.107  | 65 | 13.3 | Chr11: 82.187018 | 0.242  |
| 322<br>☐ | MA_M2F_0706_R | <a href="#">1458193_at</a>   | <i>Fabp9</i>          | fatty acid binding protein 9, testis                                                                                           | Chr3: 10.180050  | 8.970  | 65 | 12.0 | ChrX: 70.094108  | 0.084  |
| 323<br>☐ | MA_M2F_0706_R | <a href="#">1428629_at</a>   | <i>6330417 C12Rik</i> | RIKEN cDNA 6330417C12 gene                                                                                                     | Chr19: 40.917374 | 7.183  | 65 | 10.0 | Chr8: 80.868085  | -0.150 |
| 324<br>☐ | MA_M2F_0706_R | <a href="#">1417478_a_at</a> | <i>G5pr</i>           | protein phosphatase component G5PR (associated component of GANP up-regulated in GCâ€³B cells); four exons and proximal 3' UTR | Chr12: 55.281558 | 8.955  | 65 | 10.1 | Chr14: 9.528965  | 0.157  |
| 325<br>☐ | MA_M2F_0706_R | <a href="#">1417493_at</a>   | <i>Bmi1</i>           | B lymphoma Mo-MLV insertion region 1; mid 3' UTR                                                                               | Chr2: 18.685363  | 10.100 | 65 | 11.1 | Chr11: 83.064807 | 0.182  |

|                                 |               |                              |                      |                                                                                                                                                           |                  |           |    |      |                   |                |
|---------------------------------|---------------|------------------------------|----------------------|-----------------------------------------------------------------------------------------------------------------------------------------------------------|------------------|-----------|----|------|-------------------|----------------|
| 326<br><input type="checkbox"/> | MA_M2F_0706_R | <a href="#">1429623_at</a>   | <i>Zfp644</i>        | zinc finger protein 644; mid 3' UTR                                                                                                                       | Chr5: 106.617461 | 7.62<br>4 | 65 | 20.0 | Chr14: 19.755208  | 0.12<br>3      |
| 327<br><input type="checkbox"/> | MA_M2F_0706_R | <a href="#">1456324_at</a>   | <i>Zfp748</i>        | zinc finger protein 748 (KRAB type, regulator of sex-limitation); mid 3' UTR                                                                              | Chr13: 67.539283 | 6.52<br>6 | 65 | 15.1 | Chr14: 3.000000   | 0.14<br>4      |
| 328<br><input type="checkbox"/> | MA_M2F_0706_R | <a href="#">1440704_at</a>   | <i>Lgr8</i>          | leucine-rich repeat-containing G protein-coupled receptor 8                                                                                               | Chr5: 150.081733 | 6.39<br>6 | 65 | 13.0 | Chr19: 10.708414  | 0.07<br>7      |
| 329<br><input type="checkbox"/> | MA_M2F_0706_R | <a href="#">1426536_at</a>   | <i>Narg2</i>         | NMDA receptor-regulated gene 2; mid to distal 3' UTR                                                                                                      | Chr9: 69.432487  | 8.33<br>4 | 65 | 17.7 | Chr14: 3.000000   | 0.21<br>3      |
| 330<br><input type="checkbox"/> | MA_M2F_0706_R | <a href="#">1433865_at</a>   | <i>E330016L19Rik</i> | RIKEN cDNA E330016L19 gene                                                                                                                                | ChrX: 27.268743  | 5.53<br>6 | 65 | 12.8 | Chr13: 112.636263 | -<br>0.02<br>5 |
| 331<br><input type="checkbox"/> | MA_M2F_0706_R | <a href="#">1421202_at</a>   | <i>Chrna4</i>        | cholinergic receptor, nicotinic, alpha 4 (high affinity nicotine receptor with Chrnb2); last two exons and proximal 3' UTR                                | Chr2: 181.024702 | 8.68<br>8 | 65 | 10.9 | Chr13: 3.150000   | -<br>0.10<br>0 |
| 332<br><input type="checkbox"/> | MA_M2F_0706_R | <a href="#">1434267_at</a>   | <i>Nek1</i>          | NIMA (never in mitosis gene a)-related expressed kinase 1 (serine/threonine kinase, polycystic kidney disease, axonal development); distal half of 3' UTR | Chr8: 61.130775  | 6.74<br>8 | 65 | 12.2 | Chr14: 19.749489  | 0.11<br>9      |
| 333<br><input type="checkbox"/> | MA_M2F_0706_R | <a href="#">1454507_at</a>   | <i>8430432A02Rik</i> | RIKEN cDNA 8430432A02 gene                                                                                                                                | Chr1: 43.093250  | 5.89<br>0 | 65 | 15.6 | Chr14: 9.528965   | 0.04<br>3      |
| 334<br><input type="checkbox"/> | MA_M2F_0706_R | <a href="#">1452972_at</a>   | <i>1700013G20Rik</i> | RIKEN cDNA 1700013G20 gene                                                                                                                                | Chr12: 9.034923  | 9.43<br>4 | 65 | 10.8 | Chr17: 10.720847  | -<br>0.12<br>8 |
| 335<br><input type="checkbox"/> | MA_M2F_0706_R | <a href="#">1449341_a_at</a> | <i>Stom</i>          | stomatin                                                                                                                                                  | Chr2: 35.315873  | 9.34<br>2 | 65 | 8.7  | Chr11: 24.905498  | 0.11<br>1      |
| 336<br><input type="checkbox"/> | MA_M2F_0706_R | <a href="#">1429759_at</a>   | <i>Rps6ka6</i>       | ribosomal protein S6 kinase polypeptide 6                                                                                                                 | ChrX: 111.388762 | 7.26<br>4 | 65 | 9.6  | Chr14: 19.755208  | 0.12<br>0      |
| 337<br><input type="checkbox"/> | MA_M2F_0706_R | <a href="#">1418530_at</a>   | <i>Nup160</i>        | nucleoporin 160                                                                                                                                           | Chr2: 90.735779  | 7.49<br>0 | 65 | 15.9 | Chr14: 3.000000   | 0.23<br>4      |
| 338<br><input type="checkbox"/> | MA_M2F_0706_R | <a href="#">1453030_at</a>   | <i>Msl2</i>          | male-specific lethal-2 homolog (Drosophila)                                                                                                               | Chr9: 101.102224 | 7.94<br>2 | 65 | 18.5 | Chr11: 83.064807  | 0.17<br>7      |
| 339<br><input type="checkbox"/> | MA_M2F_0706_R | <a href="#">1429557_at</a>   | <i>Mcm8</i>          | minichromosome maintenance deficient 8 (S. cerevisiae)                                                                                                    | Chr2: 132.839569 | 6.12<br>8 | 65 | 13.6 | Chr4: 102.851020  | 0.07<br>2      |

|                                 |               |                              |                       |                                                                                                                                             |                   |        |    |      |                   |        |
|---------------------------------|---------------|------------------------------|-----------------------|---------------------------------------------------------------------------------------------------------------------------------------------|-------------------|--------|----|------|-------------------|--------|
| 340<br><input type="checkbox"/> | MA_M2F_0706_R | <a href="#">1440142_s_at</a> | <i>Gfap</i>           | glial fibrillary acidic protein; intron 7 or possible short form 3' UTR                                                                     | Chr11: 102.890227 | 5.771  | 65 | 15.1 | Chr14: 9.528965   | 0.055  |
| 341<br><input type="checkbox"/> | MA_M2F_0706_R | <a href="#">1451783_a_at</a> | <i>Kifap3</i>         | kinesin-associated protein 3; distal half of 3' UTR                                                                                         | Chr1: 163.916502  | 9.055  | 65 | 15.7 | Chr11: 83.064807  | 0.178  |
| 342<br><input type="checkbox"/> | MA_M2F_0706_R | <a href="#">1418381_at</a>   | <i>Zfp148</i>         | zinc finger protein 148; mid-proximal 3' UTR                                                                                                | Chr16: 33.498186  | 6.265  | 65 | 14.1 | Chr14: 3.000000   | 0.187  |
| 343<br><input type="checkbox"/> | MA_M2F_0706_R | <a href="#">1416163_at</a>   | <i>Cops4</i>          | COP9 (constitutive photomorphogenic) homolog, subunit 4; last two exons and proximal 3' UTR                                                 | Chr5: 100.543853  | 10.157 | 65 | 10.6 | Chr14: 19.755208  | 0.104  |
| 344<br><input type="checkbox"/> | MA_M2F_0706_R | <a href="#">1434563_at</a>   | <i>Rps6kc1</i>        | ribosomal protein S6 kinase polypeptide 1; mid-proximal 3' UTR or intron                                                                    | Chr1: 190.773292  | 7.684  | 65 | 13.5 | Chr14: 19.755208  | -0.106 |
| 345<br><input type="checkbox"/> | MA_M2F_0706_R | <a href="#">1450167_at</a>   | <i>Rab37</i>          | RAB37, member of RAS oncogene family (vesicle trafficking); exons 2, 3, 4, 5, 6, 8, and 9                                                   | Chr11: 115.156940 | 6.874  | 65 | 9.4  | Chr14: 49.789692  | -0.054 |
| 346<br><input type="checkbox"/> | MA_M2F_0706_R | <a href="#">1428252_at</a>   | <i>Chmp2b</i>         | chromatin modifying protein 2B (charged multivesicular body protein 2b, vacuolar protein sorting 2-2, frontotemporal lobe dementia); 3' UTR | Chr16: 65.539277  | 10.515 | 65 | 11.1 | Chr11: 83.064807  | 0.162  |
| 347<br><input type="checkbox"/> | MA_M2F_0706_R | <a href="#">1423615_at</a>   | <i>Zfp364</i>         | zinc finger protein 364; mid 3'UTR                                                                                                          | Chr3: 96.790269   | 10.319 | 65 | 16.5 | Chr11: 4.784489   | -0.099 |
| 348<br><input type="checkbox"/> | MA_M2F_0706_R | <a href="#">1435675_at</a>   | <i>Tbc1d12</i>        | TBC1D12: TBC1 domain family, member 12                                                                                                      | Chr19: 38.919081  | 9.389  | 65 | 16.0 | Chr14: 19.755208  | 0.165  |
| 349<br><input type="checkbox"/> | MA_M2F_0706_R | <a href="#">1427982_s_at</a> | <i>Syne2</i>          | synaptic nuclear envelope 2                                                                                                                 | Chr12: 76.110344  | 9.159  | 65 | 14.2 | Chr7: 84.149847   | 0.229  |
| 350<br><input type="checkbox"/> | MA_M2F_0706_R | <a href="#">1435923_at</a>   | <i>Gm237</i>          | gene model 237, (NCBI); distal 3' UTR                                                                                                       | Chr10: 67.545156  | 8.114  | 65 | 14.1 | Chr11: 83.064807  | 0.149  |
| 351<br><input type="checkbox"/> | MA_M2F_0706_R | <a href="#">1455633_at</a>   | <i>Zfp647</i>         | zinc finger protein 647; last exon and 3' UTR                                                                                               | Chr15: 76.910433  | 6.571  | 65 | 12.6 | Chr14: 24.000000  | 0.122  |
| 352<br><input type="checkbox"/> | MA_M2F_0706_R | <a href="#">1435373_at</a>   | <i>Csnk1e</i>         | casein kinase 1, epsilon; intron 7 or alternative short form 3' UTR                                                                         | Chr15: 79.422854  | 7.472  | 65 | 14.1 | Chr13: 112.636263 | 0.088  |
| 353<br><input type="checkbox"/> | MA_M2F_0706_R | <a href="#">1456757_at</a>   | <i>G630024 C07Rik</i> | RIKEN cDNA G630024C07 gene                                                                                                                  | Chr7: 127.253925  | 5.848  | 65 | 11.3 | Chr10: 67.616312  | -0.046 |

|                                 |               |                                |                    |                                                                                        |                   |            |    |      |                   |                |
|---------------------------------|---------------|--------------------------------|--------------------|----------------------------------------------------------------------------------------|-------------------|------------|----|------|-------------------|----------------|
| 354<br><input type="checkbox"/> | MA_M2F_0706_R | <a href="#">1423672_at</a>     | <i>Ttc30b</i>      | tetratricopeptide repeat domain 30B; last exon, proximal and mid 3' UTR                | Chr2: 75.936094   | 8.60<br>4  | 65 | 13.4 | Chr14: 3.000000   | 0.23<br>0      |
| 355<br><input type="checkbox"/> | MA_M2F_0706_R | <a href="#">1418066_at</a>     | <i>Cfl2</i>        | cofilin 2, muscle; distal 3' UTR                                                       | Chr12: 54.858855  | 9.19<br>2  | 65 | 17.8 | ChrX: 47.876769   | -<br>0.19<br>9 |
| 356<br><input type="checkbox"/> | MA_M2F_0706_R | <a href="#">1435150_at</a>     | <i>9030221C07</i>  | Mus musculus transcribed sequences                                                     | Chr5: 44.227847   | 6.22<br>6  | 65 | 9.5  | Chr13: 112.636263 | -<br>0.11<br>3 |
| 357<br><input type="checkbox"/> | MA_M2F_0706_R | <a href="#">1434542_at</a>     | <i>Gpt2</i>        | glutamic pyruvate transaminase (alanine aminotransferase) 2; mid 3' UTR                | Chr8: 85.526690   | 8.79<br>9  | 65 | 10.5 | Chr2: 134.800968  | -<br>0.15<br>8 |
| 358<br><input type="checkbox"/> | MA_M2F_0706_R | <a href="#">1452268_at</a>     | <i>Fam76b</i>      | family with sequence similarity 76, member B                                           | Chr9: 13.845945   | 8.47<br>5  | 65 | 13.4 | ChrX: 64.161107   | -<br>0.18<br>9 |
| 359<br><input type="checkbox"/> | MA_M2F_0706_R | <a href="#">1448045_at</a>     | <i>Ptpn9</i>       | protein tyrosine phosphatase, non-receptor type 9                                      | Chr9: 57.057487   | 6.07<br>4  | 65 | 12.4 | Chr7: 68.215797   | 0.05<br>2      |
| 360<br><input type="checkbox"/> | MA_M2F_0706_R | <a href="#">1435020_at</a>     | <i>Klhdc2</i>      | kelch domain containing 2; putative far 3' UTR (overlaps anti-sense strand of Sdccag1) | Chr12: 69.311244  | 7.87<br>5  | 65 | 15.8 | Chr14: 24.000000  | 0.18<br>9      |
| 361<br><input type="checkbox"/> | MA_M2F_0706_R | <a href="#">1424369_at</a>     | <i>Psmf1</i>       | proteasome (prosome, macropain) inhibitor subunit 1                                    | Chr2: 151.717187  | 7.31<br>3  | 65 | 10.1 | Chr14: 9.528965   | 0.19<br>2      |
| 362<br><input type="checkbox"/> | MA_M2F_0706_R | <a href="#">1455487_at</a>     | <i>Mfsd11</i>      | major facilitator superfamily domain containing 11; proximal 3' UTR                    | Chr11: 116.874123 | 10.1<br>70 | 65 | 15.7 | Chr4: 102.851020  | 0.18<br>6      |
| 363<br><input type="checkbox"/> | MA_M2F_0706_R | <a href="#">1435001_at</a>     | <i>Plaa</i>        | phospholipase A2, activating protein; mid 3' UTR                                       | Chr4: 94.567229   | 6.73<br>8  | 65 | 13.0 | Chr14: 19.755208  | 0.11<br>8      |
| 364<br><input type="checkbox"/> | MA_M2F_0706_R | <a href="#">1452612_at</a>     | <i>Ltn1</i>        | listerin E3 ubiquitin protein ligase 1                                                 | Chr16: 87.378907  | 7.37<br>0  | 65 | 11.7 | Chr14: 9.528965   | 0.13<br>4      |
| 365<br><input type="checkbox"/> | MA_M2F_0706_R | <a href="#">1427114_at</a>     | <i>Ttc19</i>       | tetratricopeptide repeat domain 19 (mitochondrial)                                     | Chr11: 62.314658  | 7.09<br>8  | 65 | 15.2 | Chr14: 9.528965   | 0.15<br>5      |
| 366<br><input type="checkbox"/> | MA_M2F_0706_R | <a href="#">1435103_x_at</a>   | <i>Farslb</i>      | phenylalanine-tRNA synthetase-like, beta subunit; last exon and proximal 3' UTR        | Chr1: 78.425104   | 10.6<br>70 | 65 | 15.2 | Chr6: 43.826811   | -<br>0.18<br>3 |
| 367<br><input type="checkbox"/> | MA_M2F_0706_R | <a href="#">1452896_at</a>     | <i>Gt13</i>        | gene trap locus 3                                                                      | Chr8: 95.421200   | 8.30<br>0  | 65 | 14.4 | Chr8: 94.374289   | -<br>0.17<br>3 |
| 368<br><input type="checkbox"/> | MA_M2F_0706_R | <a href="#">AFFX-LysX-M_at</a> | <i>AFFX-LysX-M</i> | Affymetrix bacterial LysX gene control probe set; background signal only               | ChrZ: 1.000000    | 7.26<br>2  | 65 | 11.4 | Chr14: 33.093246  | 0.20<br>0      |



|          |               |                              |                      |                                                                                                     |                  |            |    |      |                   |                |
|----------|---------------|------------------------------|----------------------|-----------------------------------------------------------------------------------------------------|------------------|------------|----|------|-------------------|----------------|
| 369<br>☐ | MA_M2F_0706_R | <a href="#">1418579_at</a>   | <i>Cetn2</i>         | centrin 2                                                                                           | ChrX: 72.913915  | 9.91<br>0  | 65 | 17.8 | ChrX: 71.441039   | -<br>0.23<br>6 |
| 370<br>☐ | MA_M2F_0706_R | <a href="#">1416680_at</a>   | <i>Ube3a</i>         | ubiquitin protein ligase E3A; last four exons (long form)                                           | Chr7: 59.288405  | 10.5<br>68 | 65 | 31.1 | Chr7: 73.746984   | 0.28<br>8      |
| 371<br>☐ | MA_M2F_0706_R | <a href="#">1454234_at</a>   | <i>1700111I05Rik</i> | RIKEN cDNA 1700111I05 gene                                                                          | Chr5: 134.901838 | 8.08<br>1  | 65 | 18.5 | Chr14: 9.546676   | -<br>0.09<br>1 |
| 372<br>☐ | MA_M2F_0706_R | <a href="#">1417508_at</a>   | <i>Rnf19</i>         | ring finger protein (C3HC4 type) 19                                                                 | Chr15: 36.240023 | 9.81<br>5  | 65 | 16.8 | Chr14: 9.528965   | 0.16<br>5      |
| 373<br>☐ | MA_M2F_0706_R | <a href="#">1418968_at</a>   | <i>Rb1cc1</i>        | RB1-inducible coiled-coil 1; mid 3'UTR                                                              | Chr1: 6.274578   | 10.2<br>45 | 65 | 10.1 | Chr10: 53.743148  | -<br>0.09<br>7 |
| 374<br>☐ | MA_M2F_0706_R | <a href="#">1449214_a_at</a> | <i>Opa1</i>          | optic atrophy 1, mitochondrial dynamin like GTPase (mitochondrial fusion); exons 23, 24, 25, and 26 | Chr16: 29.628750 | 8.26<br>1  | 65 | 9.1  | Chr4: 107.548653  | 0.11<br>6      |
| 375<br>☐ | MA_M2F_0706_R | <a href="#">1433986_at</a>   | <i>LOC221710</i>     | BC024659 (glycosyl hydrolase 2 family member); distal 3' UTR                                        | Chr13: 41.276072 | 8.32<br>4  | 65 | 14.0 | Chr14: 9.528965   | 0.14<br>4      |
| 376<br>☐ | MA_M2F_0706_R | <a href="#">1448540_a_at</a> | <i>0610012G03Rik</i> | RIKEN cDNA 0610012G03 gene                                                                          | Chr16: 31.947861 | 10.6<br>90 | 65 | 12.3 | ChrX: 70.094108   | -<br>0.12<br>4 |
| 377<br>☐ | MA_M2F_0706_R | <a href="#">1430744_at</a>   | <i>Napsa</i>         | napsin A aspartic peptidase                                                                         | Chr7: 44.582619  | 7.97<br>0  | 65 | 8.8  | Chr4: 75.824944   | -<br>0.07<br>3 |
| 378<br>☐ | MA_M2F_0706_R | <a href="#">1428341_at</a>   | <i>Zfp655</i>        | zinc finger protein 655; distal 3' UTR                                                              | Chr5: 145.246762 | 10.1<br>69 | 65 | 13.4 | ChrX: 70.094108   | -<br>0.13<br>7 |
| 379<br>☐ | MA_M2F_0706_R | <a href="#">1420561_at</a>   | <i>Trpc7</i>         | transient receptor potential cation channel, subfamily C, member 7; 3' UTR                          | Chr13: 56.773292 | 10.2<br>23 | 65 | 8.3  | Chr13: 112.636263 | 0.11<br>1      |
| 380<br>☐ | MA_M2F_0706_R | <a href="#">1453989_at</a>   | <i>Stxbp4</i>        | syntaxin binding protein 4                                                                          | Chr11: 90.599446 | 7.72<br>8  | 65 | 16.5 | Chr2: 78.100320   | -<br>0.08<br>0 |
| 381<br>☐ | MA_M2F_0706_R | <a href="#">1455679_at</a>   | <i>AI852561</i>      | RIKEN cDNA 4930434H03 gene                                                                          | Chr1: 51.464994  | 7.38<br>0  | 65 | 11.0 | Chr18: 57.293889  | 0.13<br>1      |
| 382<br>☐ | MA_M2F_0706_R | <a href="#">1415689_s_at</a> | <i>Zkscan3</i>       | zinc finger with KRAB and SCAN domains 3; mid 3' UTR                                                | Chr13: 21.387433 | 7.69<br>3  | 65 | 10.8 | Chr3: 74.704013   | -<br>0.11<br>0 |
| 383<br>☐ | MA_M2F_0706_R | <a href="#">1436770_x_at</a> | <i>Psma1</i>         | proteasome (prosome, macropain) subunit, alpha type 1; intron, mid 3'UTR, and exon                  | Chr7: 114.264747 | 5.62<br>0  | 65 | 15.2 | Chr14: 9.528965   | 0.05<br>8      |
| 384<br>☐ | MA_M2F_0706_R | <a href="#">1419351_a_at</a> | <i>C11orf73</i>      | human chromosome 11 open reading                                                                    | Chr7: 89.918925  | 9.00<br>9  | 65 | 19.1 | Chr7: 84.149847   | 0.13<br>5      |

|                                 |               |                              |                |                                                                                                                         |                   |        |    |      |                  |        |
|---------------------------------|---------------|------------------------------|----------------|-------------------------------------------------------------------------------------------------------------------------|-------------------|--------|----|------|------------------|--------|
|                                 |               |                              |                | frame 73; last three exons and proximal 3' UTR                                                                          |                   |        |    |      |                  |        |
| 385<br><input type="checkbox"/> | MA_M2F_0706_R | <a href="#">1428749_at</a>   | <i>Dmxi2</i>   | Dmx-like 2; distal 3' UTR                                                                                               | Chr9: 54.365209   | 9.961  | 65 | 12.9 | Chr11: 83.064807 | 0.153  |
| 386<br><input type="checkbox"/> | MA_M2F_0706_R | <a href="#">1434869_at</a>   | <i>Tdrd3</i>   | tudor domain containing 3 (transcriptional coactivator, stress granule associated); distal 3' UTR of short form message | Chr14: 87.514185  | 6.214  | 65 | 9.7  | Chr12: 31.211373 | 0.070  |
| 387<br><input type="checkbox"/> | MA_M2F_0706_R | <a href="#">1456604_a_at</a> | <i>Pcmt1</i>   | protein-L-isoaspartate(D-aspartate) O-methyltransferase; proximal 3' UTR                                                | Chr10: 7.630734   | 10.436 | 65 | 13.5 | Chr4: 96.896949  | 0.150  |
| 388<br><input type="checkbox"/> | MA_M2F_0706_R | <a href="#">1430535_at</a>   | <i>Tsc22d2</i> | TSC22 domain family 2; distal 3' UTR                                                                                    | Chr3: 58.461244   | 8.035  | 65 | 9.3  | Chr12: 30.182102 | 0.190  |
| 389<br><input type="checkbox"/> | MA_M2F_0706_R | <a href="#">1456038_at</a>   | <i>Fbxl4</i>   | F-box and leucine-rich repeat protein 4; 2 exons and proximal 3'UTR                                                     | Chr4: 22.427368   | 8.935  | 65 | 11.1 | Chr14: 9.528965  | 0.160  |
| 390<br><input type="checkbox"/> | MA_M2F_0706_R | <a href="#">1435682_at</a>   | <i>Lars2</i>   | leucyl-tRNA synthetase, mitochondrial; distal 3' UTR (test Mendelian 1.04, apparent transQTL)                           | Chr9: 123.462289  | 9.884  | 65 | 11.9 | Chr14: 3.000000  | 0.093  |
| 391<br><input type="checkbox"/> | MA_M2F_0706_R | <a href="#">1420139_s_at</a> | <i>Krr1</i>    | KRR1, small subunit (SSU) processome component, homolog; mid 3' UTR                                                     | Chr10: 111.985871 | 9.281  | 65 | 11.7 | Chr14: 24.000000 | 0.190  |
| 392<br><input type="checkbox"/> | MA_M2F_0706_R | <a href="#">1460585_x_at</a> | <i>Pisd</i>    | phosphatidylserine decarboxylase; mid 3' UTR (non-specific probe also aligns to Pisd-ps1, Ch 11 at 3.124090 Mb)         | Chr5: 32.736783   | 12.657 | 65 | 12.8 | Chr12: 51.647704 | -0.104 |
| 393<br><input type="checkbox"/> | MA_M2F_0706_R | <a href="#">1442656_at</a>   | <i>Elovl6</i>  | ELOVL family member 6, elongation of long chain fatty acids (yeast)                                                     | Chr3: 129.548768  | 6.792  | 65 | 10.5 | Chr1: 35.935430  | 0.075  |
| 394<br><input type="checkbox"/> | MA_M2F_0706_R | <a href="#">1449140_at</a>   | <i>Nudcd2</i>  | NudC domain containing 2; proximal 3' UTR                                                                               | Chr11: 40.739363  | 7.811  | 65 | 11.4 | Chr14: 24.000000 | 0.156  |
| 395<br><input type="checkbox"/> | MA_M2F_0706_R | <a href="#">1436706_at</a>   | <i>Tmem32</i>  | transmembrane protein 32                                                                                                | ChrX: 56.586781   | 8.848  | 65 | 13.5 | Chr14: 3.000000  | 0.199  |
| 396<br><input type="checkbox"/> | MA_M2F_0706_R | <a href="#">1431252_a_at</a> | <i>Zfp655</i>  | zinc finger protein 655                                                                                                 | Chr5: 145.244666  | 7.540  | 65 | 15.0 | ChrX: 61.058643  | -0.188 |

|          |               |                              |                       |                                                                                       |                   |        |    |      |                  |        |
|----------|---------------|------------------------------|-----------------------|---------------------------------------------------------------------------------------|-------------------|--------|----|------|------------------|--------|
| 397<br>☐ | MA_M2F_0706_R | <a href="#">1427831_s_at</a> | <i>Zfp260</i>         | zinc finger protein 260                                                               | Chr7: 30.105601   | 7.368  | 65 | 13.7 | Chr14: 3.000000  | 0.220  |
| 398<br>☐ | MA_M2F_0706_R | <a href="#">1416794_at</a>   | <i>At12</i>           | atlastin GTPase 2 (ADP-ribosylation factor-like 6 interacting protein 2); exon 9      | Chr17: 79.852664  | 8.921  | 65 | 8.8  | Chr15: 72.500609 | -0.153 |
| 399<br>☐ | MA_M2F_0706_R | <a href="#">1430623_s_at</a> | <i>5830411 E10Rik</i> | RIKEN cDNA 5830411E10 gene                                                            | Chr1: 51.470742   | 9.677  | 65 | 11.6 | Chr10: 67.616312 | -0.160 |
| 400<br>☐ | MA_M2F_0706_R | <a href="#">1421139_a_at</a> | <i>Zfp386</i>         | zinc finger protein 386 (Kruppel-like); last exon                                     | Chr12: 116.059259 | 7.447  | 65 | 11.5 | Chr14: 3.000000  | 0.198  |
| 401<br>☐ | MA_M2F_0706_R | <a href="#">1451337_at</a>   | <i>Psmf1</i>          | proteasome (prosome, macropain) inhibitor subunit 1; last 2 exons and proximal 3' UTR | Chr2: 151.718622  | 9.984  | 65 | 12.3 | Chr10: 67.616312 | -0.123 |
| 402<br>☐ | MA_M2F_0706_R | <a href="#">1419276_at</a>   | <i>Enpp1</i>          | ectonucleotide pyrophosphatase/phosphodiesterase 1                                    | Chr10: 24.645301  | 9.196  | 65 | 10.5 | Chr2: 134.800968 | 0.170  |
| 403<br>☐ | MA_M2F_0706_R | <a href="#">1420999_at</a>   | <i>Cnot4</i>          | CCR4-NOT transcription complex, subunit 4                                             | Chr6: 35.046068   | 8.044  | 65 | 9.0  | Chr2: 134.800968 | 0.132  |
| 404<br>☐ | MA_M2F_0706_R | <a href="#">1429186_a_at</a> | <i>Cdadc1</i>         | cytidine and dCMP deaminase domain containing 1                                       | Chr14: 59.586352  | 8.359  | 65 | 9.5  | Chr2: 134.800968 | 0.152  |
| 405<br>☐ | MA_M2F_0706_R | <a href="#">1416115_at</a>   | <i>Orc3l</i>          | origin recognition complex, subunit 3-like (S. cerevisiae)                            | Chr4: 34.572464   | 9.689  | 65 | 12.2 | Chr2: 134.462008 | 0.117  |
| 406<br>☐ | MA_M2F_0706_R | <a href="#">1425022_at</a>   | <i>Usp3</i>           | ubiquitin specific protease 3; last 4 exons and proximal 3' UTR                       | Chr9: 66.518371   | 10.137 | 65 | 8.9  | Chr10: 48.377966 | -0.104 |
| 407<br>☐ | MA_M2F_0706_R | <a href="#">1420977_at</a>   | <i>Man1a2</i>         | mannosidase, alpha, class 1A, member 2                                                | Chr3: 100.565465  | 8.629  | 65 | 20.6 | Chr14: 9.528965  | 0.208  |
| 408<br>☐ | MA_M2F_0706_R | <a href="#">1450762_s_at</a> | <i>Zfp191</i>         | zinc finger protein 191; proximal 3' UTR                                              | Chr18: 24.013534  | 7.585  | 65 | 8.4  | Chr15: 63.392263 | -0.073 |
| 409<br>☐ | MA_M2F_0706_R | <a href="#">1451619_at</a>   | <i>Golph3l</i>        | golgi phosphoprotein 3-like; last exon and proximal 3' UTR                            | Chr3: 95.617448   | 8.351  | 65 | 10.4 | ChrX: 84.597186  | -0.174 |
| 410<br>☐ | MA_M2F_0706_R | <a href="#">1421908_a_at</a> | <i>Tcf12</i>          | transcription factor 12; distal 3' UTR                                                | Chr9: 71.845794   | 9.714  | 65 | 14.8 | Chr15: 69.108222 | -0.166 |
| 411<br>☐ | MA_M2F_0706_R | <a href="#">1431784_a_at</a> | <i>2310066 N05Rik</i> | RIKEN cDNA 2310066I18 gene                                                            | Chr3: 146.512172  | 8.362  | 65 | 12.7 | ChrX: 64.161107  | -0.138 |
| 412<br>☐ | MA_M2F_0706_R | <a href="#">1451317_at</a>   | <i>Ythdf2</i>         | YTH domain family 2; last two exons and proximal 3' UTR                               | Chr4: 132.186852  | 9.743  | 65 | 11.8 | Chr15: 69.108222 | -0.183 |

|                                 |               |                              |                      |                                                                                                                                     |                  |            |    |      |                  |                |
|---------------------------------|---------------|------------------------------|----------------------|-------------------------------------------------------------------------------------------------------------------------------------|------------------|------------|----|------|------------------|----------------|
| 413<br><input type="checkbox"/> | MA_M2F_0706_R | <a href="#">1438264_a_at</a> | <i>Thpp2</i>         | tripeptidyl peptidase II (serine exopeptidase of the 26S proteasome); three exons                                                   | Chr1: 43.980362  | 8.21<br>4  | 65 | 8.6  | Chr14: 3.000000  | 0.19<br>1      |
| 414<br><input type="checkbox"/> | MA_M2F_0706_R | <a href="#">1420959_at</a>   | <i>Asph</i>          | aspartate-beta-hydroxylase; mid-distal 3' UTR                                                                                       | Chr4: 9.451848   | 8.13<br>3  | 65 | 12.9 | Chr14: 19.755208 | 0.21<br>5      |
| 415<br><input type="checkbox"/> | MA_M2F_0706_R | <a href="#">1421448_at</a>   | <i>Garnl1</i>        | GTPase activating RANGAP domain-like 1; exons 32, 33, 34, and 35                                                                    | Chr12: 55.640606 | 8.53<br>3  | 65 | 14.9 | ChrX: 73.428893  | -<br>0.23<br>5 |
| 416<br><input type="checkbox"/> | MA_M2F_0706_R | <a href="#">1417442_a_at</a> | <i>Pex3</i>          | peroxisomal biogenesis factor 3                                                                                                     | Chr10: 13.532375 | 9.35<br>0  | 65 | 11.7 | Chr13: 25.000000 | 0.14<br>4      |
| 417<br><input type="checkbox"/> | MA_M2F_0706_R | <a href="#">1419803_s_at</a> | <i>Ccdc12</i>        | coiled-coil domain containing 12; last three exons and proximal 3' UTR                                                              | Chr9: 110.711126 | 11.1<br>39 | 65 | 12.8 | Chr1: 5.641533   | 0.08<br>0      |
| 418<br><input type="checkbox"/> | MA_M2F_0706_R | <a href="#">1437295_at</a>   | <i>Pkn2</i>          | protein kinase N2                                                                                                                   | Chr3: 142.792158 | 9.47<br>3  | 65 | 13.0 | Chr15: 69.108222 | -<br>0.19<br>5 |
| 419<br><input type="checkbox"/> | MA_M2F_0706_R | <a href="#">1451770_s_at</a> | <i>Dhx9</i>          | DEAH (Asp-Glu-Ala-His) box polypeptide 9                                                                                            | Chr1: 153.455871 | 10.7<br>70 | 65 | 10.6 | Chr18: 65.174965 | -<br>0.12<br>6 |
| 420<br><input type="checkbox"/> | MA_M2F_0706_R | <a href="#">1416132_at</a>   | <i>Efr3a</i>         | EFR3 homolog A (hearing loss associated, activity-dependent plasticity-associated multi-pass membrane KIAA0143 protein); five exons | Chr15: 65.854698 | 7.78<br>1  | 65 | 11.3 | Chr10: 67.616312 | -<br>0.15<br>1 |
| 421<br><input type="checkbox"/> | MA_M2F_0706_R | <a href="#">1415789_a_at</a> | <i>LOC665689</i>     | similar to ubiquitin-like domain containing CTD phosphatase 1; putative exon (from ESTs)                                            | Chr11: 16.635159 | 9.06<br>9  | 65 | 13.2 | Chr11: 42.818374 | 0.28<br>6      |
| 422<br><input type="checkbox"/> | MA_M2F_0706_R | <a href="#">1418650_at</a>   | <i>Spata6</i>        | spermatogenesis associated 6                                                                                                        | Chr4: 111.799138 | 8.25<br>3  | 65 | 11.8 | Chr10: 64.710346 | -<br>0.08<br>8 |
| 423<br><input type="checkbox"/> | MA_M2F_0706_R | <a href="#">1451730_at</a>   | <i>Zfp62</i>         | zinc finger protein 62                                                                                                              | Chr11: 49.217237 | 7.29<br>5  | 65 | 11.0 | Chr14: 3.000000  | 0.12<br>6      |
| 424<br><input type="checkbox"/> | MA_M2F_0706_R | <a href="#">1434979_at</a>   | <i>4933403F05Rik</i> | RIKEN cDNA 4933403F05 gene                                                                                                          | Chr18: 68.267767 | 8.47<br>3  | 65 | 16.6 | ChrX: 73.876578  | -<br>0.20<br>3 |
| 425<br><input type="checkbox"/> | MA_M2F_0706_R | <a href="#">1423961_at</a>   | <i>Wdr26</i>         | WD repeat domain 26 (putative Mtv7, Mls1); putative far 3' UTR                                                                      | Chr1: 181.176207 | 9.62<br>3  | 65 | 13.3 | Chr15: 67.990415 | -<br>0.16<br>0 |
| 426<br><input type="checkbox"/> | MA_M2F_0706_R | <a href="#">1434332_at</a>   | <i>Zzz3</i>          | zinc finger, ZZ domain containing 3; mid to distal 3' UTR                                                                           | Chr3: 152.458886 | 10.3<br>18 | 65 | 13.1 | Chr2: 181.014276 | 0.11<br>5      |

|                                 |               |                              |                 |                                                                                           |                   |        |    |      |                  |        |
|---------------------------------|---------------|------------------------------|-----------------|-------------------------------------------------------------------------------------------|-------------------|--------|----|------|------------------|--------|
|                                 |               |                              |                 | (transQTL on chr 4 in BXD Eye Data)                                                       |                   |        |    |      |                  |        |
| 427<br><input type="checkbox"/> | MA_M2F_0706_R | <a href="#">1460399_at</a>   | <i>BC018601</i> | cDNA sequence BC018601                                                                    | Chr11: 5.529291   | 9.077  | 65 | 11.2 | Chr12: 29.713200 | 0.106  |
| 428<br><input type="checkbox"/> | MA_M2F_0706_R | <a href="#">1426842_at</a>   | <i>Ythdf3</i>   | YTH domain family 3; proximal and mid 3' UTR                                              | Chr3: 16.214439   | 10.305 | 65 | 10.2 | Chr14: 3.000000  | 0.176  |
| 429<br><input type="checkbox"/> | MA_M2F_0706_R | <a href="#">1415857_at</a>   | <i>Emb</i>      | embigin; exon 6 and proximal 3' UTR                                                       | Chr13: 117.267470 | 9.796  | 65 | 14.3 | Chr10: 67.616312 | -0.205 |
| 430<br><input type="checkbox"/> | MA_M2F_0706_R | <a href="#">1420850_at</a>   | <i>Crnkl1</i>   | Crn, crooked neck-like 1 (Drosophila)                                                     | Chr2: 145.920593  | 7.867  | 65 | 11.9 | Chr15: 68.818097 | -0.109 |
| 431<br><input type="checkbox"/> | MA_M2F_0706_R | <a href="#">1428775_at</a>   | <i>Kiaa0391</i> | mitochondrial ribonuclease P protein 3                                                    | Chr12: 55.377219  | 8.427  | 65 | 15.8 | Chr12: 46.816738 | 0.109  |
| 432<br><input type="checkbox"/> | MA_M2F_0706_R | <a href="#">1427321_s_at</a> | <i>Cxadr</i>    | coxsackievirus and adenovirus receptor; distal 3' UTR                                     | Chr16: 78.338806  | 8.548  | 65 | 12.8 | Chr10: 67.616312 | -0.155 |
| 433<br><input type="checkbox"/> | MA_M2F_0706_R | <a href="#">1426411_a_at</a> | <i>Strbp</i>    | spermatid perinuclear RNA binding protein (interleukin enhancer binding factor 3-like)    | Chr2: 37.586519   | 7.887  | 65 | 11.6 | ChrX: 73.428893  | -0.191 |
| 434<br><input type="checkbox"/> | MA_M2F_0706_R | <a href="#">1456867_x_at</a> | <i>Ergic3</i>   | ERGIC and golgi 3; last exon                                                              | Chr2: 156.018075  | 11.707 | 65 | 10.4 | Chr7: 142.462521 | -0.087 |
| 435<br><input type="checkbox"/> | MA_M2F_0706_R | <a href="#">1448127_at</a>   | <i>Rrm1</i>     | ribonucleotide reductase M1; distal 3' UTR                                                | Chr7: 102.459425  | 8.437  | 65 | 11.4 | Chr2: 136.127470 | 0.158  |
| 436<br><input type="checkbox"/> | MA_M2F_0706_R | <a href="#">1428845_at</a>   | <i>Bclaf1</i>   | BCL2-associated transcription factor 1; distal 3' UTR (transQTL on Chr 4 in BXD eye data) | Chr10: 20.341571  | 10.077 | 65 | 9.7  | Chr16: 3.500000  | -0.152 |
| 437<br><input type="checkbox"/> | MA_M2F_0706_R | <a href="#">1456255_at</a>   | <i>Kiaa0368</i> | proteasome-associated protein ECM29 homolog                                               | Chr4: 58.844163   | 6.439  | 65 | 8.7  | Chr15: 63.392263 | -0.085 |
| 438<br><input type="checkbox"/> | MA_M2F_0706_R | <a href="#">1427658_at</a>   | <i>Ctbs</i>     | chitinase, di-N-acetyl-                                                                   | Chr3: 146.459677  | 8.061  | 65 | 11.6 | Chr2: 134.800968 | 0.187  |
| 439<br><input type="checkbox"/> | MA_M2F_0706_R | <a href="#">1449666_at</a>   | <i>Atrnl1</i>   | attractin like 1; antisense of distal 3' UTR                                              | Chr19: 58.132875  | 8.404  | 65 | 12.5 | Chr10: 73.927005 | 0.049  |
| 440<br><input type="checkbox"/> | MA_M2F_0706_R | <a href="#">1448309_at</a>   | <i>Ap3m1</i>    | adaptor-related protein complex 3, mu 1 subunit; last four exons and proximal 3' UTR      | Chr14: 21.036673  | 8.785  | 65 | 12.4 | ChrX: 61.058643  | -0.179 |
| 441<br><input type="checkbox"/> | MA_M2F_0706_R | <a href="#">1426216_at</a>   | <i>Cog6</i>     | component of oligomeric golgi complex 6                                                   | Chr3: 52.982493   | 10.023 | 65 | 13.6 | ChrX: 92.675500  | -0.134 |

|                                 |               |                              |               |                                                                                                                      |                   |           |    |      |                  |            |
|---------------------------------|---------------|------------------------------|---------------|----------------------------------------------------------------------------------------------------------------------|-------------------|-----------|----|------|------------------|------------|
| 442<br><input type="checkbox"/> | MA_M2F_0706_R | <a href="#">1457949_at</a>   | <i>Nt5c2</i>  | 5'-nucleotidase, cytosolic II; putative exon                                                                         | Chr19: 46.885497  | 7.80<br>8 | 65 | 9.6  | Chr10: 53.743148 | -<br>0.089 |
| 443<br><input type="checkbox"/> | MA_M2F_0706_R | <a href="#">1437348_at</a>   | <i>Fbxo28</i> | F-box protein 28                                                                                                     | Chr1: 182.315610  | 9.00<br>4 | 65 | 9.2  | Chr2: 136.127470 | 0.10<br>6  |
| 444<br><input type="checkbox"/> | MA_M2F_0706_R | <a href="#">1427466_at</a>   | <i>Pigu</i>   | phosphatidylinositol glycan anchor biosynthesis, class U (Pigu)                                                      | Chr2: 155.278639  | 7.43<br>6 | 65 | 14.9 | Chr15: 28.321742 | 0.10<br>9  |
| 445<br><input type="checkbox"/> | MA_M2F_0706_R | <a href="#">1418369_at</a>   | <i>Prim1</i>  | DNA primase, p49 subunit                                                                                             | Chr10: 128.023845 | 8.67<br>7 | 65 | 10.9 | Chr11: 83.064807 | 0.17<br>1  |
| 446<br><input type="checkbox"/> | MA_M2F_0706_R | <a href="#">1425491_at</a>   | <i>Bmpr1a</i> | bone morphogenetic protein receptor, type 1A                                                                         | Chr14: 34.414005  | 8.24<br>7 | 65 | 18.8 | ChrX: 73.428893  | -<br>0.170 |
| 447<br><input type="checkbox"/> | MA_M2F_0706_R | <a href="#">1429250_at</a>   | <i>Dnchc2</i> | dynein, cytoplasmic, heavy chain 2; last 4 exons (transQTL on Chr 4 in BXD eye data)                                 | Chr9: 6.929469    | 9.35<br>0 | 65 | 10.0 | Chr2: 138.500000 | 0.11<br>0  |
| 448<br><input type="checkbox"/> | MA_M2F_0706_R | <a href="#">1421880_at</a>   | <i>Mtmr1</i>  | myotubularin related protein 1                                                                                       | ChrX: 71.418081   | 8.72<br>8 | 65 | 16.7 | ChrX: 73.428893  | -<br>0.153 |
| 449<br><input type="checkbox"/> | MA_M2F_0706_R | <a href="#">1453263_at</a>   | <i>Mak10</i>  | MAK10 homolog, amino-acid N-acetyltransferase subunit, (S. cerevisiae)                                               | Chr13: 59.600932  | 7.82<br>3 | 65 | 9.0  | Chr2: 134.800968 | 0.11<br>6  |
| 450<br><input type="checkbox"/> | MA_M2F_0706_R | <a href="#">1418974_at</a>   | <i>Blzf1</i>  | basic leucine zipper nuclear factor 1                                                                                | Chr1: 164.292202  | 8.46<br>6 | 65 | 9.2  | Chr12: 51.647704 | 0.09<br>7  |
| 451<br><input type="checkbox"/> | MA_M2F_0706_R | <a href="#">1434918_at</a>   | <i>Sox6</i>   | SRY-box containing gene 6                                                                                            | Chr7: 115.471185  | 9.71<br>4 | 65 | 11.0 | Chr11: 83.064807 | 0.11<br>3  |
| 452<br><input type="checkbox"/> | MA_M2F_0706_R | <a href="#">1452504_s_at</a> | <i>Ctbs</i>   | chitinase, di-N-acetyl-                                                                                              | Chr3: 146.458794  | 9.42<br>9 | 65 | 11.4 | Chr13: 22.380465 | 0.19<br>3  |
| 453<br><input type="checkbox"/> | MA_M2F_0706_R | <a href="#">1419749_at</a>   | <i>Dnmt2</i>  | DNA methyltransferase 2                                                                                              | Chr2: 13.511244   | 8.02<br>2 | 65 | 14.0 | Chr14: 3.000000  | 0.22<br>3  |
| 454<br><input type="checkbox"/> | MA_M2F_0706_R | <a href="#">1426456_a_at</a> | <i>Miz1</i>   | Msx-interacting-zinc finger; exons 8, 9, 10, and 11                                                                  | Chr18: 77.133220  | 9.30<br>2 | 65 | 15.7 | ChrX: 73.876578  | -<br>0.152 |
| 455<br><input type="checkbox"/> | MA_M2F_0706_R | <a href="#">1450915_at</a>   | <i>Ap3b1</i>  | adaptor-related protein complex 3, beta 1 subunit; exons 13, 14, 15, and 16                                          | Chr13: 94.462396  | 9.15<br>3 | 65 | 9.8  | Chr15: 89.576205 | -<br>0.191 |
| 456<br><input type="checkbox"/> | MA_M2F_0706_R | <a href="#">1448348_at</a>   | <i>Gpiap1</i> | cell cycle associated protein 1 (cytoplasmic activation- and proliferation-associated protein 1); exons 9 through 12 | Chr2: 103.773010  | 9.66<br>8 | 65 | 12.2 | Chr15: 89.576205 | -<br>0.207 |

|                                 |               |                              |                      |                                                                                         |                  |            |    |      |                  |                |
|---------------------------------|---------------|------------------------------|----------------------|-----------------------------------------------------------------------------------------|------------------|------------|----|------|------------------|----------------|
| 457<br><input type="checkbox"/> | MA_M2F_0706_R | <a href="#">1424397_at</a>   | <i>Dhx36</i>         | DEAH (Asp-Glu-Ala-His) box polypeptide 36                                               | Chr3: 62.470459  | 7.06<br>9  | 65 | 12.8 | Chr14: 3.000000  | 0.13<br>3      |
| 458<br><input type="checkbox"/> | MA_M2F_0706_R | <a href="#">1426824_at</a>   | <i>Psme4</i>         | proteasome (prosome, macropain) activator subunit 4                                     | Chr11: 30.856055 | 10.8<br>99 | 65 | 16.3 | ChrX: 73.028443  | -<br>0.22<br>7 |
| 459<br><input type="checkbox"/> | MA_M2F_0706_R | <a href="#">1425473_at</a>   | <i>Crsp6</i>         | cofactor required for Sp1 transcriptional activation, subunit 6; exon and 3'UTR         | Chr9: 15.262099  | 9.34<br>3  | 65 | 11.2 | Chr4: 107.548653 | 0.12<br>0      |
| 460<br><input type="checkbox"/> | MA_M2F_0706_R | <a href="#">1429029_at</a>   | <i>4933405A16Rik</i> | RIKEN cDNA 4933405A16 gene                                                              | Chr3: 131.322799 | 8.25<br>8  | 65 | 12.0 | Chr12: 51.647704 | 0.18<br>1      |
| 461<br><input type="checkbox"/> | MA_M2F_0706_R | <a href="#">1451968_at</a>   | <i>Xrcc5</i>         | X-ray repair complementing defective repair in Chinese hamster cells 5; last five exons | Chr1: 72.381622  | 9.45<br>5  | 65 | 11.2 | Chr8: 25.520489  | -<br>0.09<br>6 |
| 462<br><input type="checkbox"/> | MA_M2F_0706_R | <a href="#">1455439_a_at</a> | <i>Lgals1</i>        | lectin, galactose binding, soluble 1; last exon and proximal 3' UTR                     | Chr15: 78.930026 | 13.0<br>86 | 65 | 10.7 | Chr6: 49.309149  | 0.17<br>1      |
| 463<br><input type="checkbox"/> | MA_M2F_0706_R | <a href="#">1440817_x_at</a> | <i>Zfp771</i>        | zinc finger protein 771; proximal 3' UTR                                                | Chr7: 127.254639 | 10.8<br>00 | 65 | 10.1 | Chr1: 35.935430  | 0.10<br>0      |
| 464<br><input type="checkbox"/> | MA_M2F_0706_R | <a href="#">1429720_at</a>   | <i>Mak10</i>         | MAK10 homolog, amino-acid N-acetyltransferase subunit, (S. cerevisiae)                  | Chr13: 59.617941 | 8.44<br>8  | 65 | 11.3 | Chr2: 134.800968 | 0.18<br>5      |
| 465<br><input type="checkbox"/> | MA_M2F_0706_R | <a href="#">1428307_at</a>   | <i>Zdhhc13</i>       | zinc finger, DHHC domain containing 13; 2 exons and 3'UTR                               | Chr7: 48.826869  | 9.83<br>4  | 65 | 11.9 | Chr10: 67.616312 | -<br>0.10<br>0 |
| 466<br><input type="checkbox"/> | MA_M2F_0706_R | <a href="#">1434400_at</a>   | <i>Tgif2</i>         | TGFB-induced factor 2                                                                   | Chr2: 156.855011 | 8.39<br>9  | 65 | 17.2 | Chr10: 67.616312 | 0.11<br>1      |
| 467<br><input type="checkbox"/> | MA_M2F_0706_R | <a href="#">1419548_at</a>   | <i>Kpna1</i>         | karyopherin (importin) alpha 1                                                          | Chr16: 36.035423 | 8.39<br>0  | 65 | 10.5 | Chr14: 3.000000  | 0.19<br>8      |
| 468<br><input type="checkbox"/> | MA_M2F_0706_R | <a href="#">1454690_at</a>   | <i>Ikbkg</i>         | inhibitor of kappaB kinase gamma                                                        | ChrX: 74.451245  | 8.52<br>1  | 65 | 14.0 | Chr2: 136.127470 | 0.11<br>1      |
| 469<br><input type="checkbox"/> | MA_M2F_0706_R | <a href="#">1423159_at</a>   | <i>Dld</i>           | dihydrolipoamide dehydrogenase; 2 exons and 3'UTR                                       | Chr12: 31.332098 | 12.5<br>05 | 65 | 11.4 | Chr13: 20.437691 | 0.12<br>4      |
| 470<br><input type="checkbox"/> | MA_M2F_0706_R | <a href="#">1423748_at</a>   | <i>Pdk1</i>          | pyruvate dehydrogenase kinase isoenzyme 1; distal 3' UTR                                | Chr2: 71.901415  | 9.69<br>8  | 65 | 10.9 | Chr6: 44.021906  | -<br>0.12<br>1 |
| 471<br><input type="checkbox"/> | MA_M2F_0706_R | <a href="#">1425497_a_at</a> | <i>Prpf4b</i>        | PRP4 pre-mRNA processing factor 4 homolog B; last 3 exons                               | Chr13: 34.899199 | 7.69<br>4  | 65 | 11.9 | ChrX: 73.876578  | -<br>0.13<br>9 |

|          |               |                              |                |                                                                                                       |                   |        |    |      |                  |        |
|----------|---------------|------------------------------|----------------|-------------------------------------------------------------------------------------------------------|-------------------|--------|----|------|------------------|--------|
| 472<br>☐ | MA_M2F_0706_R | <a href="#">1443117_at</a>   | <i>Eya1</i>    | eyes absent 1 homolog (Drosophila)                                                                    | Chr1: 14.301362   | 6.115  | 65 | 8.5  | Chr10: 67.616312 | 0.064  |
| 473<br>☐ | MA_M2F_0706_R | <a href="#">1450745_at</a>   | <i>C1galt1</i> | core 1 synthase, glycoprotein-N-acetylgalactosamine 3-beta-galactosyltransferase                      | Chr6: 7.871503    | 9.260  | 65 | 9.8  | ChrX: 84.597186  | -0.168 |
| 474<br>☐ | MA_M2F_0706_R | <a href="#">1451124_at</a>   | <i>Sod1</i>    | superoxide dismutase 1, soluble; first four exons and 3' UTR                                          | Chr16: 90.222782  | 13.768 | 65 | 8.3  | Chr2: 17.898115  | 0.198  |
| 475<br>☐ | MA_M2F_0706_R | <a href="#">1452062_at</a>   | <i>Prpsap2</i> | phosphoribosyl pyrophosphate synthetase-associated protein 2                                          | Chr11: 61.729821  | 9.996  | 65 | 9.7  | Chr10: 67.616312 | -0.104 |
| 476<br>☐ | MA_M2F_0706_R | <a href="#">1426463_at</a>   | <i>Gphn</i>    | gephyrin (GABA and glycine receptor scaffolding protein); last four exons and proximal 3' UTR         | Chr12: 78.682757  | 9.513  | 65 | 9.3  | Chr3: 128.292533 | 0.167  |
| 477<br>☐ | MA_M2F_0706_R | <a href="#">1422772_at</a>   | <i>C1galt1</i> | core 1 synthase, glycoprotein-N-acetylgalactosamine 3-beta-galactosyltransferase; putative far 3' UTR | Chr6: 7.872849    | 8.974  | 65 | 13.5 | ChrX: 64.161107  | -0.256 |
| 478<br>☐ | MA_M2F_0706_R | <a href="#">1421333_a_at</a> | <i>Mynn</i>    | myoneurin                                                                                             | Chr3: 30.611514   | 7.431  | 65 | 18.1 | ChrX: 73.876578  | -0.170 |
| 479<br>☐ | MA_M2F_0706_R | <a href="#">1422990_at</a>   | <i>Met</i>     | met proto-oncogene; last 3 exons and proximal 3' UTR                                                  | Chr6: 17.563641   | 8.746  | 65 | 13.6 | Chr14: 81.380779 | -0.212 |
| 480<br>☐ | MA_M2F_0706_R | <a href="#">1421508_at</a>   | <i>Odz1</i>    | odd Oz/ten-m homolog 1                                                                                | ChrX: 42.532423   | 6.520  | 65 | 15.8 | Chr10: 73.927005 | 0.068  |
| 481<br>☐ | MA_M2F_0706_R | <a href="#">1444566_at</a>   | <i>Ucp2</i>    | uncoupling protein 2 (mitochondrial, proton carrier)                                                  | Chr7: 100.505342  | 7.751  | 65 | 11.0 | Chr15: 29.045905 | 0.063  |
| 482<br>☐ | MA_M2F_0706_R | <a href="#">1416706_at</a>   | <i>Rpe</i>     | ribulose-5-phosphate-3-epimerase; last exon and proximal 3' UTR                                       | Chr1: 66.717830   | 9.394  | 65 | 11.7 | Chr15: 68.818097 | -0.174 |
| 483<br>☐ | MA_M2F_0706_R | <a href="#">1459976_s_at</a> | <i>Sod1</i>    | superoxide dismutase 1, soluble; last exon and proximal 3' UTR                                        | Chr16: 90.226197  | 13.425 | 65 | 11.0 | Chr15: 67.990415 | 0.187  |
| 484<br>☐ | MA_M2F_0706_R | <a href="#">1443962_at</a>   | <i>Tfdp2</i>   | transcription factor Dp 2                                                                             | Chr9: 96.310545   | 7.909  | 65 | 9.4  | Chr2: 136.127470 | 0.120  |
| 485<br>☐ | MA_M2F_0706_R | <a href="#">1416061_at</a>   | <i>Tbc1d15</i> | TBC1 domain family, member 15; last three exons and proximal 3' UTR                                   | Chr10: 115.199419 | 10.012 | 65 | 14.9 | Chr10: 55.515150 | -0.129 |
| 486<br>☐ | MA_M2F_0706_R | <a href="#">1455378_at</a>   | <i>Rimkla</i>  | ribosomal protein S6 modification-like protein; distal 3' UTR                                         | Chr4: 119.465329  | 6.074  | 65 | 9.5  | Chr9: 108.969240 | -0.040 |



|                                 |               |                              |                      |                                                                                                                      |                  |            |    |      |                  |                |
|---------------------------------|---------------|------------------------------|----------------------|----------------------------------------------------------------------------------------------------------------------|------------------|------------|----|------|------------------|----------------|
| 487<br><input type="checkbox"/> | MA_M2F_0706_R | <a href="#">1454929_s_at</a> | <i>AU018122</i>      | hypothetical protein E130307D12                                                                                      | Chr17: 56.606034 | 10.9<br>13 | 65 | 13.9 | Chr2: 138.500000 | -<br>0.14<br>0 |
| 488<br><input type="checkbox"/> | MA_M2F_0706_R | <a href="#">1426264_at</a>   | <i>Dlat</i>          | dihydrolipoamide S-acetyltransferase (E2 component of pyruvate dehydrogenase complex); last exon and proximal 3' UTR | Chr9: 50.636189  | 10.9<br>79 | 65 | 10.0 | Chr15: 67.990415 | -<br>0.10<br>1 |
| 489<br><input type="checkbox"/> | MA_M2F_0706_R | <a href="#">1422216_at</a>   | <i>Mid2</i>          | midline 2                                                                                                            | ChrX: 140.764824 | 7.30<br>9  | 65 | 18.7 | Chr14: 9.528965  | 0.13<br>8      |
| 490<br><input type="checkbox"/> | MA_M2F_0706_R | <a href="#">1455541_a_at</a> | <i>4430402I18Rik</i> | RIKEN cDNA 4430402I18 gene                                                                                           | Chr19: 28.927648 | 6.98<br>8  | 65 | 23.1 | Chr2: 134.519309 | 0.13<br>2      |
| 491<br><input type="checkbox"/> | MA_M2F_0706_R | <a href="#">1423822_a_at</a> | <i>8430437G11Rik</i> | RIKEN cDNA 8430437G11 gene                                                                                           | Chr6: 13.582027  | 9.33<br>6  | 65 | 13.3 | Chr16: 3.500000  | -<br>0.17<br>1 |
| 492<br><input type="checkbox"/> | MA_M2F_0706_R | <a href="#">1440790_x_at</a> | <i>AL024069</i>      | expressed sequence AL024069                                                                                          | Chr1: 84.259943  | 6.35<br>5  | 65 | 9.8  | Chr10: 67.616312 | 0.08<br>6      |
| 493<br><input type="checkbox"/> | MA_M2F_0706_R | <a href="#">1454811_a_at</a> | <i>Serinc1</i>       | serine incorporator 1; last exon and proximal 3' UTR                                                                 | Chr10: 57.517129 | 11.0<br>35 | 65 | 14.5 | ChrX: 59.235496  | -<br>0.20<br>7 |
| 494<br><input type="checkbox"/> | MA_M2F_0706_R | <a href="#">1441208_at</a>   | <i>Hdhd2</i>         | haloacid dehalogenase-like hydrolase domain containing; putative deep 3' UTR                                         | Chr18: 76.973281 | 8.11<br>3  | 65 | 12.5 | Chr14: 9.546676  | 0.07<br>7      |
| 495<br><input type="checkbox"/> | MA_M2F_0706_R | <a href="#">1418527_a_at</a> | <i>Srsf10</i>        | serine/arginine-rich splicing factor 10; exons 3, 4, and 5                                                           | Chr4: 135.861784 | 8.10<br>0  | 65 | 11.4 | Chr14: 3.000000  | 0.17<br>1      |
| 496<br><input type="checkbox"/> | MA_M2F_0706_R | <a href="#">1456671_at</a>   | <i>Tbrg3</i>         | transforming growth factor beta regulated gene 3                                                                     | Chr15: 82.896065 | 7.02<br>3  | 65 | 11.4 | Chr10: 67.616312 | 0.04<br>7      |
| 497<br><input type="checkbox"/> | MA_M2F_0706_R | <a href="#">1434469_at</a>   | <i>Otud4</i>         | OTU domain containing 4; mid 3' UTR                                                                                  | Chr8: 79.675793  | 7.92<br>6  | 65 | 14.9 | ChrX: 73.876578  | -<br>0.25<br>1 |
| 498<br><input type="checkbox"/> | MA_M2F_0706_R | <a href="#">1431811_a_at</a> | <i>Fbxo34</i>        | F-box only protein 34; 3' UTR from proximal to distal                                                                | Chr14: 47.531295 | 9.17<br>9  | 65 | 7.3  | Chr14: 19.755208 | 0.10<br>2      |
| 499<br><input type="checkbox"/> | MA_M2F_0706_R | <a href="#">1437809_x_at</a> | <i>Ets2</i>          | E26 avian leukemia oncogene 2, 3' domain                                                                             | Chr16: 95.720926 | 6.75<br>6  | 65 | 9.3  | Chr10: 67.616312 | 0.12<br>3      |
| 500<br><input type="checkbox"/> | MA_M2F_0706_R | <a href="#">1454238_a_at</a> | <i>1700010H22Rik</i> | RIKEN cDNA 1700010H22 gene                                                                                           | Chr5: 98.564199  | 7.56<br>3  | 65 | 13.8 | Chr2: 137.000000 | -<br>0.09<br>6 |
| 501<br><input type="checkbox"/> | MA_M2F_0706_R | <a href="#">1422842_at</a>   | <i>Xrn2</i>          | 5'-3' exoribonuclease 2; exons 8, 9, and 10                                                                          | Chr2: 147.027593 | 8.37<br>9  | 65 | 10.1 | Chr2: 134.800968 | 0.21<br>8      |
| 502<br><input type="checkbox"/> | MA_M2F_0706_R | <a href="#">1449532_at</a>   | <i>Chrng</i>         | cholinergic receptor, nicotinic, gamma polypeptide (developmental                                                    | Chr1: 87.210631  | 7.93<br>9  | 65 | 8.8  | Chr14: 9.528965  | -<br>0.12<br>3 |

|                                 |               |                              |                       |                                                                                           |                  |            |    |      |                   |                |
|---------------------------------|---------------|------------------------------|-----------------------|-------------------------------------------------------------------------------------------|------------------|------------|----|------|-------------------|----------------|
|                                 |               |                              |                       | subunit in muscle replaced by Chrne); last three exons and proximal 3' UTR                |                  |            |    |      |                   |                |
| 503<br><input type="checkbox"/> | MA_M2F_0706_R | <a href="#">1458791_at</a>   | <i>Gbe1</i>           | glucan (1,4-alpha-), branching enzyme 1                                                   | Chr16: 70.490294 | 5.73<br>6  | 65 | 14.4 | Chr2: 134.519309  | 0.07<br>4      |
| 504<br><input type="checkbox"/> | MA_M2F_0706_R | <a href="#">1433908_a_at</a> | <i>Cttn</i>           | cortactin; distal 3' UTR                                                                  | Chr7: 144.435770 | 12.9<br>23 | 65 | 12.4 | Chr7: 52.768893   | -<br>0.11<br>7 |
| 505<br><input type="checkbox"/> | MA_M2F_0706_R | <a href="#">1433582_at</a>   | <i>C3orf58</i>        | human chromosome 3 open reading frame 58; mid 3' UTR                                      | Chr9: 94.518936  | 7.08<br>5  | 65 | 10.1 | Chr14: 19.755208  | 0.10<br>4      |
| 506<br><input type="checkbox"/> | MA_M2F_0706_R | <a href="#">1450348_at</a>   | <i>Slc19a3</i>        | solute carrier family 19 (sodium/hydrogen exchanger), member 3                            | Chr1: 83.014703  | 7.71<br>0  | 65 | 10.4 | Chr3: 25.041091   | 0.15<br>9      |
| 507<br><input type="checkbox"/> | MA_M2F_0706_R | <a href="#">1452496_at</a>   | <i>Atp11c</i>         | ATPase, class VI, type 11C                                                                | ChrX: 60.236631  | 6.88<br>4  | 65 | 9.6  | Chr11: 103.979646 | -<br>0.10<br>2 |
| 508<br><input type="checkbox"/> | MA_M2F_0706_R | <a href="#">1424280_at</a>   | <i>Mospd1</i>         | motile sperm domain containing 1; mid to distal 3' UTR                                    | ChrX: 53.345058  | 9.18<br>9  | 65 | 9.3  | Chr11: 4.784489   | -<br>0.13<br>2 |
| 509<br><input type="checkbox"/> | MA_M2F_0706_R | <a href="#">1434127_a_at</a> | <i>H3f3a</i>          | H3 histone, family 3A; distal 3' UTR                                                      | Chr1: 180.802580 | 15.5<br>17 | 65 | 12.0 | Chr4: 81.726726   | 0.10<br>9      |
| 510<br><input type="checkbox"/> | MA_M2F_0706_R | <a href="#">1419501_at</a>   | <i>Polk</i>           | polymerase (DNA directed), kappa                                                          | Chr13: 96.483584 | 7.72<br>0  | 65 | 9.5  | Chr15: 67.990415  | -<br>0.04<br>6 |
| 511<br><input type="checkbox"/> | MA_M2F_0706_R | <a href="#">1416759_at</a>   | <i>Mical1</i>         | microtubule associated monooxygenase, calponin and LIM domain containing 1                | Chr10: 41.485859 | 6.46<br>6  | 65 | 12.6 | Chr2: 134.800968  | -<br>0.10<br>7 |
| 512<br><input type="checkbox"/> | MA_M2F_0706_R | <a href="#">1423198_a_at</a> | <i>Smek2</i>          | SMEK homolog 2 suppressor of mek1; four exons                                             | Chr11: 29.200761 | 8.66<br>5  | 65 | 9.8  | Chr2: 134.800968  | 0.19<br>5      |
| 513<br><input type="checkbox"/> | MA_M2F_0706_R | <a href="#">1425023_at</a>   | <i>Usp3</i>           | ubiquitin specific protease 3                                                             | Chr9: 66.517750  | 7.99<br>9  | 65 | 11.0 | Chr4: 102.851020  | 0.12<br>8      |
| 514<br><input type="checkbox"/> | MA_M2F_0706_R | <a href="#">1444573_at</a>   | <i>C130040 D06Rik</i> | ESTs, Weakly similar to apoptosis-associated tyrosine kinase [M.musculus]                 | Chr7: 45.793185  | 6.76<br>2  | 65 | 13.4 | Chr2: 134.800968  | -<br>0.12<br>8 |
| 515<br><input type="checkbox"/> | MA_M2F_0706_R | <a href="#">1419471_a_at</a> | <i>Nudc</i>           | nudC nuclear distribution protein; exon 5                                                 | Chr4: 133.534290 | 9.75<br>1  | 65 | 11.0 | Chr11: 83.064807  | -<br>0.11<br>6 |
| 516<br><input type="checkbox"/> | MA_M2F_0706_R | <a href="#">1427937_at</a>   | <i>Vma21</i>          | vacuolar ATPase assembly integral membrane protein VMA21; 3' UTR (low specificity probes) | ChrX: 71.821526  | 8.30<br>8  | 65 | 10.1 | Chr14: 3.000000   | 0.18<br>1      |

|                                 |               |                              |                       |                                                                                                         |                   |           |    |      |                  |                |
|---------------------------------|---------------|------------------------------|-----------------------|---------------------------------------------------------------------------------------------------------|-------------------|-----------|----|------|------------------|----------------|
| 517<br><input type="checkbox"/> | MA_M2F_0706_R | <a href="#">1428074_at</a>   | <i>Tmem158</i>        | transmembrane protein 158; 3' UTR                                                                       | Chr9: 123.259067  | 8.37<br>3 | 65 | 10.8 | Chr16: 97.368149 | -<br>0.13<br>0 |
| 518<br><input type="checkbox"/> | MA_M2F_0706_R | <a href="#">1455019_x_at</a> | <i>Ckap4</i>          | cytoskeleton-associated protein 4; distal 3' UTR                                                        | Chr10: 84.526376  | 9.25<br>4 | 65 | 11.5 | Chr10: 67.616312 | 0.09<br>8      |
| 519<br><input type="checkbox"/> | MA_M2F_0706_R | <a href="#">1428543_at</a>   | <i>Ppat</i>           | phosphoribosyl pyrophosphate amidotransferase                                                           | Chr5: 76.915968   | 7.27<br>9 | 65 | 8.5  | Chr17: 10.720847 | -<br>0.18<br>2 |
| 520<br><input type="checkbox"/> | MA_M2F_0706_R | <a href="#">1452780_at</a>   | <i>Gtf3c2</i>         | general transcription factor IIIC, polypeptide 2, beta; last exon and 3' UTR (complex 3' UTR structure) | Chr5: 31.157418   | 9.86<br>8 | 65 | 8.5  | ChrX: 84.597186  | -<br>0.09<br>7 |
| 521<br><input type="checkbox"/> | MA_M2F_0706_R | <a href="#">1453368_at</a>   | <i>2310003 H01Rik</i> | RIKEN cDNA 2310003H01 gene                                                                              | Chr11: 120.376210 | 8.27<br>6 | 65 | 13.0 | Chr2: 134.800968 | -<br>0.10<br>4 |
| 522<br><input type="checkbox"/> | MA_M2F_0706_R | <a href="#">1426451_at</a>   | <i>Spg11</i>          | spastic paraplegia 11 (autosomal recessive); last 4 exons and 3' UTR                                    | Chr2: 122.053846  | 8.99<br>0 | 65 | 9.0  | Chr14: 3.000000  | 0.13<br>1      |
| 523<br><input type="checkbox"/> | MA_M2F_0706_R | <a href="#">1423121_at</a>   | <i>Ide</i>            | insulin degrading enzyme                                                                                | Chr19: 37.269994  | 7.63<br>0 | 65 | 14.5 | Chr14: 9.528965  | 0.20<br>7      |
| 524<br><input type="checkbox"/> | MA_M2F_0706_R | <a href="#">1417514_at</a>   | <i>Ssx2ip</i>         | synovial sarcoma, X breakpoint 2 interacting protein; last three exons and proximal 3' UTR              | Chr3: 146.436598  | 8.37<br>5 | 65 | 21.8 | ChrX: 73.876578  | -<br>0.18<br>0 |
| 525<br><input type="checkbox"/> | MA_M2F_0706_R | <a href="#">1419049_at</a>   | <i>Pcnx</i>           | pecanex homolog; mid 3' UTR                                                                             | Chr12: 81.998196  | 6.30<br>2 | 65 | 9.5  | Chr10: 73.927005 | -<br>0.05<br>6 |
| 526<br><input type="checkbox"/> | MA_M2F_0706_R | <a href="#">1433018_at</a>   | <i>4930560 O18Rik</i> | RIKEN cDNA 4930560O18 gene                                                                              | Chr7: 120.101793  | 5.95<br>4 | 65 | 9.7  | Chr13: 90.420702 | -<br>0.03<br>9 |
| 527<br><input type="checkbox"/> | MA_M2F_0706_R | <a href="#">1418502_a_at</a> | <i>Oxr1</i>           | oxidation resistance 1; mid 3' UTR                                                                      | Chr15: 41.859688  | 8.97<br>1 | 65 | 11.7 | Chr15: 12.672705 | -<br>0.13<br>7 |
| 528<br><input type="checkbox"/> | MA_M2F_0706_R | <a href="#">1453463_at</a>   | <i>1700019 B03Rik</i> | RIKEN cDNA 1700019B03 gene                                                                              | Chr8: 3.483752    | 6.22<br>5 | 65 | 14.2 | Chr2: 134.519309 | 0.06<br>3      |
| 529<br><input type="checkbox"/> | MA_M2F_0706_R | <a href="#">1451222_at</a>   | <i>Btf3l4</i>         | basic transcription factor 3-like 4; mid 3' UTR                                                         | Chr4: 108.815322  | 9.79<br>5 | 65 | 9.9  | Chr14: 3.000000  | 0.14<br>7      |
| 530<br><input type="checkbox"/> | MA_M2F_0706_R | <a href="#">1425705_a_at</a> | <i>Ero1lb</i>         | endoplasmic oxidoreductase 1 beta; four exons                                                           | Chr13: 12.600282  | 6.87<br>0 | 65 | 11.8 | ChrX: 73.876578  | -<br>0.07<br>3 |
| 531<br><input type="checkbox"/> | MA_M2F_0706_R | <a href="#">1427258_at</a>   | <i>Trim24</i>         | tripartite motif protein 24; last 2 exons and proximal half of 3' UTR                                   | Chr6: 37.965621   | 8.65<br>3 | 65 | 9.2  | Chr2: 138.500000 | 0.14<br>3      |
| 532<br><input type="checkbox"/> | MA_M2F_0706_R | <a href="#">1437179_at</a>   | <i>Rif1</i>           | replication timing regulatory factor 1                                                                  | Chr2: 52.103552   | 7.51<br>0 | 65 | 11.4 | Chr2: 134.800968 | 0.25<br>9      |

|          |               |                              |                                 |                                                                                                       |                   |        |    |      |                   |       |
|----------|---------------|------------------------------|---------------------------------|-------------------------------------------------------------------------------------------------------|-------------------|--------|----|------|-------------------|-------|
|          |               |                              |                                 | (telomere-associated protein); exons 20, 21, 22                                                       |                   |        |    |      |                   |       |
| 533<br>☐ | MA_M2F_0706_R | <a href="#">1453533_at</a>   | <b>4933403</b><br><i>O08Rik</i> | RIKEN cDNA 4933403O08 gene                                                                            | ChrX: 112.243333  | 6.049  | 65 | 10.3 | Chr10: 121.639039 | 0.043 |
| 534<br>☐ | MA_M2F_0706_R | <a href="#">1451500_at</a>   | <i>Ushbp1</i>                   | Usher syndrome 1C binding protein 1; last three exons and 3' UTR                                      | Chr8: 71.385386   | 8.258  | 65 | 13.9 | Chr10: 64.710346  | 0.106 |
| 535<br>☐ | MA_M2F_0706_R | <a href="#">1450052_at</a>   | <i>Kif2a</i>                    | kinesin family member 2A                                                                              | Chr13: 68.474071  | 8.025  | 65 | 10.0 | Chr11: 9.165457   | 0.109 |
| 536<br>☐ | MA_M2F_0706_R | <a href="#">1438365_x_at</a> | <i>Laptm4b</i>                  | lysosomal-associated protein transmembrane 4B; distal 3' UTR                                          | Chr15: 34.284138  | 13.172 | 65 | 11.7 | Chr2: 136.127470  | 0.134 |
| 537<br>☐ | MA_M2F_0706_R | <a href="#">1449336_a_at</a> | <i>Slk</i>                      | STE20-like kinase (yeast)                                                                             | Chr19: 47.638928  | 8.150  | 65 | 11.7 | Chr14: 3.000000   | 0.158 |
| 538<br>☐ | MA_M2F_0706_R | <a href="#">1435876_at</a>   | <i>C86350</i>                   | expressed sequence C86350                                                                             | Chr6: 130.727814  | 5.776  | 65 | 9.1  | Chr14: 9.528965   | 0.026 |
| 539<br>☐ | MA_M2F_0706_R | <a href="#">1429110_a_at</a> | <i>Nsun4</i>                    | NOL1/NOP2/Sun domain family, member 4 (mitochondrial ribosome 5-methylcytosine RNA methyltransferase) | Chr4: 116.034034  | 8.796  | 65 | 10.0 | ChrX: 73.028443   | 0.138 |
| 540<br>☐ | MA_M2F_0706_R | <a href="#">1456347_at</a>   | <i>Lnpep</i>                    | leucyl/cystinyl aminopeptidase                                                                        | Chr17: 17.531573  | 7.029  | 65 | 8.7  | Chr3: 128.292533  | 0.107 |
| 541<br>☐ | MA_M2F_0706_R | <a href="#">1426806_at</a>   | <i>Obfc2a</i>                   | oligonucleotide/oligosaccharide-binding fold; mid 3' UTR                                              | Chr1: 51.470336   | 9.935  | 65 | 8.9  | ChrX: 71.441039   | 0.128 |
| 542<br>☐ | MA_M2F_0706_R | <a href="#">1429734_at</a>   | <b>4632434I</b><br><i>11Rik</i> | RIKEN cDNA 4632434I11 gene                                                                            | Chr7: 92.858364   | 6.074  | 65 | 11.8 | Chr14: 9.528965   | 0.074 |
| 543<br>☐ | MA_M2F_0706_R | <a href="#">1444121_at</a>   | <i>LOC231291</i>                | hypothetical protein LOC231291                                                                        | Chr13: 59.131302  | 6.200  | 65 | 15.0 | Chr10: 71.957979  | 0.073 |
| 544<br>☐ | MA_M2F_0706_R | <a href="#">1421044_at</a>   | <i>Mrc2</i>                     | mannose receptor, C type 2                                                                            | Chr11: 105.348315 | 7.429  | 65 | 14.4 | Chr14: 3.000000   | 0.091 |
| 545<br>☐ | MA_M2F_0706_R | <a href="#">1415682_at</a>   | <i>Xpo7</i>                     | exportin 7                                                                                            | Chr14: 70.664923  | 9.069  | 65 | 16.1 | Chr15: 68.818097  | 0.100 |
| 546<br>☐ | MA_M2F_0706_R | <a href="#">1426896_at</a>   | <i>Zfp191</i>                   | zinc finger protein 191                                                                               | Chr18: 24.010778  | 8.131  | 65 | 10.6 | Chr14: 3.000000   | 0.196 |
| 547<br>☐ | MA_M2F_0706_R | <a href="#">1426265_x_at</a> | <i>Dlat</i>                     | dihydrolipoamide S-acetyltransferase (E2 component of pyruvate                                        | Chr9: 50.636189   | 11.137 | 65 | 13.3 | Chr7: 84.149847   | 0.122 |

|                                                                                            |                            |                              |                       |                                                                                                            |                  |        |    |      |                  |        |
|--------------------------------------------------------------------------------------------|----------------------------|------------------------------|-----------------------|------------------------------------------------------------------------------------------------------------|------------------|--------|----|------|------------------|--------|
|                                                                                            |                            |                              |                       | dehydrogenase complex); last exon and proximal 3' UTR                                                      |                  |        |    |      |                  |        |
| 548<br>   | MA_M2F_0706_R_1418109_at   | <a href="#">1418109_at</a>   | <i>Gspt2</i>          | G1 to S phase transition 2; only exon and 3' UTR                                                           | ChrX: 94.637967  | 7.203  | 65 | 15.1 | Chr2: 134.519309 | 0.107  |
| 549<br>   | MA_M2F_0706_R_1438142_s_at | <a href="#">1438142_s_at</a> | <i>1700021 K14Rik</i> | RIKEN cDNA 1700021K14 gene                                                                                 | Chr9: 107.997994 | 6.574  | 65 | 11.5 | Chr18: 68.914646 | -0.060 |
| 550<br>   | MA_M2F_0706_R_1416162_at   | <a href="#">1416162_at</a>   | <i>Rad21</i>          | RAD21 homolog; last four exons                                                                             | Chr15: 51.964055 | 9.706  | 65 | 8.8  | Chr10: 67.616312 | -0.179 |
| 551<br>   | MA_M2F_0706_R_1433724_at   | <a href="#">1433724_at</a>   | <i>Fam91a1</i>        | family with sequence similarity 91, member A1 (skeletal muscle cells re-entry induced); mid 3' UTR         | Chr15: 58.456028 | 8.907  | 65 | 8.6  | Chr2: 134.800968 | 0.150  |
| 552<br>   | MA_M2F_0706_R_1451519_at   | <a href="#">1451519_at</a>   | <i>Rnf2</i>           | ring finger protein 2                                                                                      | Chr1: 151.470414 | 9.050  | 65 | 11.5 | Chr11: 4.784489  | -0.142 |
| 553<br>   | MA_M2F_0706_R_1426563_at   | <a href="#">1426563_at</a>   | <i>Zfp553</i>         | zinc finger protein 553; last exon and 3' UTR                                                              | Chr7: 127.236909 | 7.302  | 65 | 14.5 | Chr14: 9.528965  | -0.122 |
| 554<br>   | MA_M2F_0706_R_1422801_at   | <a href="#">1422801_at</a>   | <i>G3bp</i>           | Ras-GTPase-activating protein SH3-domain binding protein (interferon, alpha-inducible protein); mid 3' UTR | Chr11: 55.499735 | 11.713 | 65 | 7.1  | Chr15: 67.990415 | 0.145  |
| 555<br>  | MA_M2F_0706_R_1460531_at   | <a href="#">1460531_at</a>   | <i>Syne1</i>          | spectrin repeat containing, nuclear envelope 1; apparent intron (from AK013759)                            | Chr10: 5.287650  | 6.519  | 65 | 8.5  | Chr9: 41.233417  | 0.053  |
| 556<br> | MA_M2F_0706_R_1437903_at   | <a href="#">1437903_at</a>   | <i>Lox</i>            | lysyl oxidase                                                                                              | Chr18: 52.517103 | 5.877  | 65 | 16.5 | Chr2: 136.127956 | 0.051  |
| 557<br> | MA_M2F_0706_R_1442486_at   | <a href="#">1442486_at</a>   | <i>Leprel1</i>        | leprecan-like 1                                                                                            | Chr16: 23.037936 | 6.250  | 65 | 11.3 | Chr2: 156.631489 | 0.054  |
| 558<br> | MA_M2F_0706_R_1441176_at   | <a href="#">1441176_at</a>   | <i>LincR</i>          | ESTs                                                                                                       | Chr7: 51.612266  | 6.185  | 65 | 11.6 | Chr2: 136.127470 | -0.108 |
| 559<br> | MA_M2F_0706_R_1425339_at   | <a href="#">1425339_at</a>   | <i>Plcb4</i>          | phospholipase C, beta 4; four exons (central exons or 3' exons of short form)                              | Chr2: 135.971757 | 6.665  | 65 | 11.1 | Chr2: 136.127470 | 0.071  |
| 560<br> | MA_M2F_0706_R_1460157_at   | <a href="#">1460157_at</a>   | <i>Smc12</i>          | SMC (structural maintenance of chromosomes 1)-like 2 (S. cerevisiae)                                       | Chr19: 20.241215 | 6.008  | 65 | 10.3 | Chr14: 19.755208 | 0.037  |
| 561<br> | MA_M2F_0706_R_1440377_at   | <a href="#">1440377_at</a>   | <i>Tigd5</i>          | tigger transposable element derived 5 homolog                                                              | Chr15: 75.913188 | 6.829  | 65 | 16.9 | Chr14: 3.000000  | -0.100 |

|                                 |               |                              |                       |                                                                                                                          |                   |        |    |      |                  |        |
|---------------------------------|---------------|------------------------------|-----------------------|--------------------------------------------------------------------------------------------------------------------------|-------------------|--------|----|------|------------------|--------|
| 562<br><input type="checkbox"/> | MA_M2F_0706_R | <a href="#">1422838_at</a>   | <i>Kcnu1</i>          | potassium channel, subfamily U, member 1 (potassium large conductance pH-sensitive channel, subfamily M, alpha member 3) | Chr8: 25.932408   | 6.054  | 65 | 13.6 | Chr14: 9.528965  | 0.050  |
| 563<br><input type="checkbox"/> | MA_M2F_0706_R | <a href="#">1442372_at</a>   | <i>A630050 E13Rik</i> | RIKEN cDNA A630050E13 gene                                                                                               | Chr17: 75.532282  | 6.479  | 65 | 8.5  | Chr2: 158.947668 | -0.048 |
| 564<br><input type="checkbox"/> | MA_M2F_0706_R | <a href="#">1427003_at</a>   | <i>Ppp2r5c</i>        | protein phosphatase 2, regulatory subunit B (B56), gamma isoform; 3' end intron or 3' UTR                                | Chr12: 110.571149 | 8.542  | 65 | 12.5 | Chr4: 84.752005  | 0.117  |
| 565<br><input type="checkbox"/> | MA_M2F_0706_R | <a href="#">1430362_at</a>   | <i>Sorbs1</i>         | sorbin and SH3 domain containing 1; intron                                                                               | Chr19: 40.472821  | 6.735  | 65 | 16.1 | ChrX: 71.441039  | 0.074  |
| 566<br><input type="checkbox"/> | MA_M2F_0706_R | <a href="#">1421756_a_at</a> | <i>Gpr19</i>          | G protein-coupled receptor 19 (strong cisQTL in eye); center and 3' end of exon                                          | Chr6: 134.869544  | 7.356  | 65 | 9.4  | Chr14: 9.528965  | 0.090  |
| 567<br><input type="checkbox"/> | MA_M2F_0706_R | <a href="#">1428887_at</a>   | <i>Zfp157</i>         | zinc finger protein 157; last exon                                                                                       | Chr5: 138.456534  | 6.224  | 65 | 10.3 | ChrX: 84.597186  | -0.065 |
| 568<br><input type="checkbox"/> | MA_M2F_0706_R | <a href="#">1422694_at</a>   | <i>Ttyh1</i>          | tweety homolog 1 (Drosophila); proximal 3' UTR                                                                           | Chr7: 4.134350    | 6.081  | 65 | 11.2 | Chr2: 134.800968 | -0.062 |
| 569<br><input type="checkbox"/> | MA_M2F_0706_R | <a href="#">1425199_a_at</a> | <i>Epb4.115</i>       | erythrocyte protein band 4.1-like 5; last exon and 3'UTR                                                                 | Chr1: 119.595376  | 10.901 | 65 | 11.8 | Chr2: 181.014276 | 0.125  |

**Supplemental Table S11. Top 200 genes in male for 3 probes in Ace2**

| Dataset                                                                                  | Trait ID                                                                            | Symbol                                                                              | Description                                                                         | Location                                                                            | Mean                                                                                | N Cases                                                                                                                                                                        | Max LRS                                                                                                                                                                        | Max LRS Location Chr and Mb                                                           | Add                                                                                                                                                                            |       |
|------------------------------------------------------------------------------------------|-------------------------------------------------------------------------------------|-------------------------------------------------------------------------------------|-------------------------------------------------------------------------------------|-------------------------------------------------------------------------------------|-------------------------------------------------------------------------------------|--------------------------------------------------------------------------------------------------------------------------------------------------------------------------------|--------------------------------------------------------------------------------------------------------------------------------------------------------------------------------|---------------------------------------------------------------------------------------|--------------------------------------------------------------------------------------------------------------------------------------------------------------------------------|-------|
|       |  |  |  |  |  | <br> | <br> |  | <br> |       |
| 1<br> | MA_M2M_0706_R                                                                       | <a href="#">1425103_at</a>                                                          | <i>Ace2</i>                                                                         | angiotensin I converting enzyme (peptidyl-dipeptidase A) 2; middle to distal 3'-UTR | ChrX: 164.187853                                                                    | 10.201                                                                                                                                                                         | 45                                                                                                                                                                             | 12.0                                                                                  | Chr1: 14.576853                                                                                                                                                                | 0.169 |

|                                |               |                              |                 |                                                                                               |                  |        |    |      |                  |        |
|--------------------------------|---------------|------------------------------|-----------------|-----------------------------------------------------------------------------------------------|------------------|--------|----|------|------------------|--------|
| 2<br><input type="checkbox"/>  | MA_M2M_0706_R | <a href="#">1452138_a_at</a> | <i>Ace2</i>     | angiotensin I converting enzyme (peptidyl-dipeptidase A) 2; last 2~6 and 11 exons             | ChrX: 164.167855 | 10.125 | 45 | 13.1 | Chr8: 89.094303  | 0.214  |
| 3<br><input type="checkbox"/>  | MA_M2M_0706_R | <a href="#">1430561_at</a>   | <i>Dnajb14</i>  | DnaJ (Hsp40) homolog, subfamily B, member 14; proximal and mid 3' UTR                         | Chr3: 137.908489 | 8.283  | 45 | 11.7 | Chr2: 78.100320  | 0.259  |
| 4<br><input type="checkbox"/>  | MA_M2M_0706_R | <a href="#">1438719_at</a>   | <i>AI585793</i> | expressed sequence AI585793                                                                   | Chr18: 32.232049 | 7.583  | 45 | 13.0 | Chr18: 31.556239 | -0.209 |
| 5<br><input type="checkbox"/>  | MA_M2M_0706_R | <a href="#">1425102_a_at</a> | <i>Ace2</i>     | angiotensin I converting enzyme (peptidyl-dipeptidase A) 2; 3'-UTR and last 4 exons           | ChrX: 164.182645 | 10.127 | 45 | 10.2 | Chr9: 107.639250 | 0.185  |
| 6<br><input type="checkbox"/>  | MA_M2M_0706_R | <a href="#">1438736_at</a>   | <i>Thoc2</i>    | THO complex 2; four exons                                                                     | ChrX: 41.822401  | 8.389  | 45 | 8.7  | Chr3: 53.053282  | -0.152 |
| 7<br><input type="checkbox"/>  | MA_M2M_0706_R | <a href="#">1440486_at</a>   | <i>C12orf41</i> | human chromosome 12 open reading frame 41; far 3' UTR                                         | Chr15: 98.517815 | 7.542  | 45 | 8.7  | Chr13: 3.150000  | 0.081  |
| 8<br><input type="checkbox"/>  | MA_M2M_0706_R | <a href="#">1423341_at</a>   | <i>Cspg4</i>    | chondroitin sulfate proteoglycan 4                                                            | Chr9: 56.899348  | 8.585  | 45 | 11.4 | Chr6: 40.799296  | 0.151  |
| 9<br><input type="checkbox"/>  | MA_M2M_0706_R | <a href="#">1457304_at</a>   | <i>Jarid2</i>   | jumonji, AT rich interactive domain 2                                                         | Chr13: 44.756689 | 5.955  | 45 | 7.4  | Chr5: 24.321400  | 0.076  |
| 10<br><input type="checkbox"/> | MA_M2M_0706_R | <a href="#">1439661_at</a>   | <i>Slc16a14</i> | RIKEN cDNA 1110004H10 gene                                                                    | Chr1: 84.905979  | 8.885  | 45 | 16.1 | Chr3: 65.524002  | -0.349 |
| 11<br><input type="checkbox"/> | MA_M2M_0706_R | <a href="#">1457639_at</a>   | <i>Atp6v1h</i>  | ATPase, H+ transporting, lysosomal, V1 subunit H; intronic or alternative splicing (AK081492) | Chr1: 5.099623   | 6.534  | 45 | 9.4  | Chr2: 69.342849  | 0.116  |
| 12<br><input type="checkbox"/> | MA_M2M_0706_R | <a href="#">1459392_at</a>   | <i>Phf8</i>     | PHD finger protein 8                                                                          | ChrX: 151.625300 | 7.100  | 45 | 11.4 | Chr6: 125.820102 | 0.082  |
| 13<br><input type="checkbox"/> | MA_M2M_0706_R | <a href="#">1436874_x_at</a> | <i>Slc25a5</i>  | solute carrier family 25 (mitochondrial carrier, adenine nucleotide translocator),            | ChrX: 36.797832  | 16.402 | 45 | 8.3  | ChrX: 102.414526 | 0.081  |

|         |               |                              |                 |                                                                                                                                                                                   |                  |        |    |      |                  |        |
|---------|---------------|------------------------------|-----------------|-----------------------------------------------------------------------------------------------------------------------------------------------------------------------------------|------------------|--------|----|------|------------------|--------|
|         |               |                              |                 | member 5; last two exons and 3' UTR                                                                                                                                               |                  |        |    |      |                  |        |
| 14<br>☐ | MA_M2M_0706_R | <a href="#">1456717_at</a>   | <i>Tead1</i>    | TEA domain family member 1 (SV40 transcriptional enhancer factor, Sveinsson's chorioretinal atrophy)                                                                              | Chr7: 112.681339 | 5.970  | 45 | 8.6  | Chr3: 129.497470 | 0.148  |
| 15<br>☐ | MA_M2M_0706_R | <a href="#">1442251_at</a>   | <i>Vcpip1</i>   | valosin containing protein (p97)/p47 complex interacting protein 1                                                                                                                | Chr1: 9.744461   | 5.641  | 45 | 9.7  | Chr9: 29.939029  | -0.041 |
| 16<br>☐ | MA_M2M_0706_R | <a href="#">1442277_at</a>   | <i>Chka</i>     | choline kinase alpha; last intron or 3' UTR                                                                                                                                       | Chr19: 3.865325  | 8.170  | 45 | 8.2  | Chr2: 69.724603  | 0.171  |
| 17<br>☐ | MA_M2M_0706_R | <a href="#">1415878_at</a>   | <i>Rrm1</i>     | ribonucleotide reductase M1                                                                                                                                                       | Chr7: 102.468420 | 8.552  | 45 | 12.5 | Chr1: 80.325854  | 0.073  |
| 18<br>☐ | MA_M2M_0706_R | <a href="#">1460151_at</a>   | --              | polymorphic LTR element; NACHT, leucine rich repeat and PYD containing 1                                                                                                          | Chr1: 13.621363  | 8.231  | 45 | 24.6 | Chr1: 13.073341  | -0.322 |
| 19<br>☐ | MA_M2M_0706_R | <a href="#">1451458_at</a>   | <i>Tmem2</i>    | transmembrane protein 2; 4 exons                                                                                                                                                  | Chr19: 21.852229 | 8.663  | 45 | 7.4  | Chr1: 58.115573  | -0.157 |
| 20<br>☐ | MA_M2M_0706_R | <a href="#">1457106_at</a>   | <i>BC052885</i> | 10 days neonate cerebellum cDNA, RIKEN full-length enriched library, clone:6530405K19 product:similar to DEATH RECEPTOR-INTERACTING PROTEIN [Homo sapiens], full insert sequence. | Chr17: 84.191519 | 7.275  | 45 | 10.6 | Chr3: 57.334874  | 0.077  |
| 21<br>☐ | MA_M2M_0706_R | <a href="#">1450849_at</a>   | <i>Hnrnpu</i>   | heterogeneous nuclear ribonucleoprotein U; five central exons                                                                                                                     | Chr1: 178.330821 | 12.202 | 45 | 13.8 | Chr7: 24.937915  | 0.416  |
| 22<br>☐ | MA_M2M_0706_R | <a href="#">1437082_at</a>   | <i>Akap9</i>    | A kinase (PRKA) anchor protein (yotiao) 9; exons 3, 4, and 5 and distal end of intron 3                                                                                           | Chr5: 3.954395   | 6.823  | 45 | 13.1 | Chr2: 178.717318 | 0.120  |
| 23<br>☐ | MA_M2M_0706_R | <a href="#">1422495_a_at</a> | <i>Hmgn1</i>    | high mobility group nucleosomal binding domain 1; mid 3' UTR                                                                                                                      | Chr16: 18.938220 | 13.533 | 45 | 9.3  | Chr10: 87.643399 | -0.098 |



|                                |               |                            |                      |                                                                                                                             |                   |        |    |      |                   |        |
|--------------------------------|---------------|----------------------------|----------------------|-----------------------------------------------------------------------------------------------------------------------------|-------------------|--------|----|------|-------------------|--------|
| 24<br><input type="checkbox"/> | MA_M2M_0706_R | <a href="#">1424084_at</a> | <i>Rod1</i>          | ROD1 regulator of differentiation 1 (S. pombe)                                                                              | Chr4: 59.475963   | 5.859  | 45 | 12.5 | Chr1: 62.725845   | -0.111 |
| 25<br><input type="checkbox"/> | MA_M2M_0706_R | <a href="#">1441580_at</a> | <i>Sgpp2</i>         | sphingosine-1-phosphate phosphatase 2                                                                                       | Chr1: 78.392722   | 7.537  | 45 | 11.8 | Chr4: 131.999242  | -0.078 |
| 26<br><input type="checkbox"/> | MA_M2M_0706_R | <a href="#">1421412_at</a> | <i>Gsc</i>           | goosecoid                                                                                                                   | Chr12: 104.471487 | 6.271  | 45 | 11.5 | Chr6: 23.372761   | 0.050  |
| 27<br><input type="checkbox"/> | MA_M2M_0706_R | <a href="#">1417231_at</a> | <i>Cldn2</i>         | claudin 2                                                                                                                   | ChrX: 139.810790  | 14.468 | 45 | 15.5 | Chr15: 93.021696  | 0.130  |
| 28<br><input type="checkbox"/> | MA_M2M_0706_R | <a href="#">1436746_at</a> | <i>Prkwnk1</i>       | protein kinase, lysine deficient 1; exons 4, 6 and 7                                                                        | Chr6: 119.969525  | 9.367  | 45 | 9.9  | Chr2: 18.263847   | -0.355 |
| 29<br><input type="checkbox"/> | MA_M2M_0706_R | <a href="#">1436157_at</a> | <i>Ccar1</i>         | cell division cycle and apoptosis regulator; exons 14 through 17                                                            | Chr10: 62.753390  | 11.141 | 45 | 13.6 | Chr2: 18.263847   | -0.257 |
| 30<br><input type="checkbox"/> | MA_M2M_0706_R | <a href="#">1436747_at</a> | <i>LOC280487</i>     | pol polyprotein                                                                                                             | Chr11: 116.438594 | 12.033 | 45 | 13.7 | Chr13: 103.949936 | -0.144 |
| 31<br><input type="checkbox"/> | MA_M2M_0706_R | <a href="#">1420500_at</a> | <i>Dnajc1</i>        | DnaJ (Hsp40) homolog, subfamily C, member 1; last 2 exons and 3' UTR                                                        | Chr2: 18.217204   | 8.557  | 45 | 12.0 | Chr13: 103.949936 | 0.169  |
| 32<br><input type="checkbox"/> | MA_M2M_0706_R | <a href="#">1456979_at</a> | <i>Zhx3</i>          | zinc fingers and homeoboxes 3                                                                                               | Chr2: 160.856133  | 8.270  | 45 | 6.8  | Chr9: 68.339182   | 0.120  |
| 33<br><input type="checkbox"/> | MA_M2M_0706_R | <a href="#">1446201_at</a> | <i>6430519O13Rik</i> | 0 day neonate eyeball cDNA, RIKEN full-length enriched library, clone:E130116B10 product:unknown EST, full insert sequence. | Chr9: 9.220662    | 7.465  | 45 | 12.2 | Chr1: 62.725845   | -0.169 |
| 34<br><input type="checkbox"/> | MA_M2M_0706_R | <a href="#">1424098_at</a> | <i>Elov17</i>        | ELOVL family member 7, elongation of long chain fatty acids (yeast); mid 3' UTR                                             | Chr13: 108.283633 | 8.726  | 45 | 11.8 | Chr5: 24.371012   | 0.203  |
| 35<br><input type="checkbox"/> | MA_M2M_0706_R | <a href="#">1458028_at</a> | <i>LOC231291</i>     | hypothetical protein LOC231291                                                                                              | Chr11: 78.846291  | 8.093  | 45 | 11.9 | Chr6: 125.820102  | 0.077  |

|                                |               |                              |                      |                                                                                                                          |                  |        |    |      |                  |        |
|--------------------------------|---------------|------------------------------|----------------------|--------------------------------------------------------------------------------------------------------------------------|------------------|--------|----|------|------------------|--------|
| 36<br><input type="checkbox"/> | MA_M2M_0706_R | <a href="#">1445669_at</a>   | <i>Spry4</i>         | sprouty homolog 4 (Drosophila)                                                                                           | Chr18: 38.586291 | 6.072  | 45 | 6.5  | Chr9: 29.939029  | -0.054 |
| 37<br><input type="checkbox"/> | MA_M2M_0706_R | <a href="#">1456340_at</a>   | <i>2610205E22Rik</i> | RIKEN cDNA 2610205E22 gene                                                                                               | Chr2: 30.817111  | 8.020  | 45 | 11.7 | Chr2: 78.100320  | 0.207  |
| 38<br><input type="checkbox"/> | MA_M2M_0706_R | <a href="#">1449439_at</a>   | <i>Klf7</i>          | Kruppel-like factor 7 (ubiquitous); far 3' UTR                                                                           | Chr1: 64.032879  | 7.895  | 45 | 12.1 | Chr5: 131.541036 | -0.136 |
| 39<br><input type="checkbox"/> | MA_M2M_0706_R | <a href="#">1445144_at</a>   | <i>A630075K04Rik</i> | RIKEN cDNA A630075K04 (similar to putative histidine kinase)                                                             | Chr15: 55.840826 | 7.347  | 45 | 17.2 | Chr6: 43.826811  | 0.052  |
| 40<br><input type="checkbox"/> | MA_M2M_0706_R | <a href="#">1426586_at</a>   | <i>Slc25a11</i>      | solute carrier family 25 (mitochondrial carrier; oxoglutarate carrier), member 11; exons 5,6, and 8, and proximal 3' UTR | Chr11: 70.644618 | 13.209 | 45 | 13.3 | Chr2: 104.427306 | -0.113 |
| 41<br><input type="checkbox"/> | MA_M2M_0706_R | <a href="#">1450650_at</a>   | <i>Myo10</i>         | myosin X (conventional non-muscle myosin heavy chain IIB, May-Hegglin anomaly); last three exons and 3' UTR              | Chr15: 25.808154 | 9.524  | 45 | 10.2 | Chr1: 37.639250  | -0.209 |
| 42<br><input type="checkbox"/> | MA_M2M_0706_R | <a href="#">1430820_a_at</a> | <i>Bbx</i>           | bobby sox HMG-BOX transcription factor; exons 6, 7, and 8                                                                | Chr16: 50.224892 | 7.643  | 45 | 11.2 | Chr5: 25.445855  | 0.271  |
| 43<br><input type="checkbox"/> | MA_M2M_0706_R | <a href="#">1437862_at</a>   | <i>Rbm25</i>         | RNA binding motif protein 25; distal 3' UTR of short form message                                                        | Chr12: 83.663292 | 9.099  | 45 | 16.1 | Chr7: 6.024860   | 0.409  |
| 44<br><input type="checkbox"/> | MA_M2M_0706_R | <a href="#">1425836_a_at</a> | <i>Limk1</i>         | LIM-domain containing, protein kinase; mid 3' UTR (putative miR-134 target)                                              | Chr5: 134.656678 | 9.628  | 45 | 11.2 | Chr2: 80.327515  | -0.130 |
| 45<br><input type="checkbox"/> | MA_M2M_0706_R | <a href="#">1436983_at</a>   | <i>Crebbp</i>        | CREB binding protein; two exons toward 3' end of gene                                                                    | Chr16: 4.093487  | 8.419  | 45 | 11.1 | Chr2: 78.100320  | 0.285  |
| 46<br><input type="checkbox"/> | MA_M2M_0706_R | <a href="#">1441100_at</a>   | <i>Mbtd1</i>         | mbt domain containing 1                                                                                                  | Chr11: 93.912698 | 7.041  | 45 | 8.6  | Chr4: 121.044402 | -0.174 |
| 47<br><input type="checkbox"/> | MA_M2M_0706_R | <a href="#">1418024_at</a>   | <i>Narg1</i>         | NMDA receptor-regulated gene 1; four central exons                                                                       | Chr3: 51.458625  | 8.303  | 45 | 13.8 | Chr2: 70.716531  | 0.283  |

|                                |               |                              |                      |                                                                                                                     |                  |        |    |      |                  |        |
|--------------------------------|---------------|------------------------------|----------------------|---------------------------------------------------------------------------------------------------------------------|------------------|--------|----|------|------------------|--------|
| 48<br><input type="checkbox"/> | MA_M2M_0706_R | <a href="#">1443053_at</a>   | <i>Ptprd</i>         | protein tyrosine phosphatase, receptor type, D; intron 1 (from EST AK053007)                                        | Chr4: 76.435514  | 7.633  | 45 | 33.9 | Chr4: 75.840751  | -0.372 |
| 49<br><input type="checkbox"/> | MA_M2M_0706_R | <a href="#">1439832_at</a>   | <i>Wasl</i>          | Wiskott-Aldrich syndrome-like (human)                                                                               | Chr6: 24.621920  | 7.056  | 45 | 9.6  | Chr2: 178.717318 | 0.142  |
| 50<br><input type="checkbox"/> | MA_M2M_0706_R | <a href="#">1430542_a_at</a> | <i>Slc25a5</i>       | solute carrier family 25 (mitochondrial carrier, adenine nucleotide translocator), member 5                         | ChrX: 36.798388  | 16.091 | 45 | 10.0 | Chr7: 71.696966  | 0.089  |
| 51<br><input type="checkbox"/> | MA_M2M_0706_R | <a href="#">1423137_at</a>   | <i>Rala</i>          | v-ral simian leukemia viral oncogene homolog A (ras related); first three exons                                     | Chr13: 17.888504 | 9.009  | 45 | 11.5 | Chr3: 57.673432  | -0.262 |
| 52<br><input type="checkbox"/> | MA_M2M_0706_R | <a href="#">1449292_at</a>   | <i>Rb1cc1</i>        | RB1-inducible coiled-coil 1; exon 13                                                                                | Chr1: 6.248798   | 7.287  | 45 | 7.9  | Chr7: 6.024860   | 0.269  |
| 53<br><input type="checkbox"/> | MA_M2M_0706_R | <a href="#">1440083_at</a>   | <i>Cdc42</i>         | cell division cycle 42 (activator of Rac); intron 1                                                                 | Chr4: 137.336477 | 7.239  | 45 | 10.4 | Chr2: 70.495989  | 0.102  |
| 54<br><input type="checkbox"/> | MA_M2M_0706_R | <a href="#">1450054_at</a>   | <i>Add1</i>          | adducin 1 (alpha, calmodulin-binding, spectrin-actin network assembly protein); distal 3' UTR (long variant 3' UTR) | Chr5: 34.631716  | 12.257 | 45 | 13.4 | Chr5: 139.505838 | 0.081  |
| 55<br><input type="checkbox"/> | MA_M2M_0706_R | <a href="#">1435899_at</a>   | <i>9430079B08Rik</i> | RIKEN cDNA 9430079B08 gene                                                                                          | Chr1: 106.721229 | 7.541  | 45 | 8.6  | Chr6: 51.246390  | 0.115  |
| 56<br><input type="checkbox"/> | MA_M2M_0706_R | <a href="#">1448803_at</a>   | <i>Golga4</i>        | golgi autoantigen, golgin subfamily a, 4                                                                            | Chr9: 118.556220 | 8.990  | 45 | 10.5 | Chr7: 6.024860   | 0.285  |
| 57<br><input type="checkbox"/> | MA_M2M_0706_R | <a href="#">1448996_at</a>   | <i>Rom1</i>          | rod outer segment membrane protein 1 (retinitis pigmentosa, peripherin-related, digenic)                            | Chr19: 8.927670  | 7.606  | 45 | 11.8 | Chr12: 46.420986 | -0.069 |
| 58<br><input type="checkbox"/> | MA_M2M_0706_R | <a href="#">1425565_at</a>   | <i>Rest</i>          | RE1-silencing transcription factor; last exon (5' end)                                                              | Chr5: 77.280782  | 9.446  | 45 | 8.4  | Chr2: 18.263847  | -0.156 |
| 59<br><input type="checkbox"/> | MA_M2M_0706_R | <a href="#">1437457_a_at</a> | <i>Mtpn</i>          | myotrophin; mid-distal 3' UTR                                                                                       | Chr6: 35.509968  | 9.714  | 45 | 7.3  | Chr5: 25.445855  | 0.215  |

|    |                          |               |                              |                      |                                                                                                           |                   |        |    |      |                  |        |
|----|--------------------------|---------------|------------------------------|----------------------|-----------------------------------------------------------------------------------------------------------|-------------------|--------|----|------|------------------|--------|
| 60 | <input type="checkbox"/> | MA_M2M_0706_R | <a href="#">1454287_at</a>   | <i>4931428A05Rik</i> | RIKEN cDNA 4931428A05 gene                                                                                | Chr1: 90.758673   | 7.086  | 45 | 10.5 | Chr1: 3.010274   | 0.121  |
| 61 | <input type="checkbox"/> | MA_M2M_0706_R | <a href="#">1417000_at</a>   | <i>Abtb1</i>         | ankyrin repeat and BTB (POZ) domain containing 1                                                          | Chr6: 88.836073   | 8.863  | 45 | 7.9  | Chr11: 120.95690 | -0.115 |
| 62 | <input type="checkbox"/> | MA_M2M_0706_R | <a href="#">1416309_at</a>   | <i>Nusap1</i>        | nucleolar and spindle associated protein 1                                                                | Chr2: 119.649197  | 6.993  | 45 | 15.9 | Chr9: 107.650604 | 0.133  |
| 63 | <input type="checkbox"/> | MA_M2M_0706_R | <a href="#">1436982_at</a>   | <i>AI848765</i>      | expressed sequence AI848765                                                                               | Chr15: 80.940450  | 8.744  | 45 | 9.3  | Chr3: 53.053282  | -0.197 |
| 64 | <input type="checkbox"/> | MA_M2M_0706_R | <a href="#">1418414_at</a>   | <i>Kcnh1</i>         | potassium voltage-gated channel, subfamily H (eag-related), member 1                                      | Chr1: 192.506537  | 7.515  | 45 | 8.5  | Chr14: 42.240278 | 0.093  |
| 65 | <input type="checkbox"/> | MA_M2M_0706_R | <a href="#">1448883_at</a>   | <i>Lgmn</i>          | legumain cysteine protease; last two exons and proximal 3' UTR                                            | Chr12: 102.394497 | 13.431 | 45 | 10.4 | Chr15: 91.405127 | 0.186  |
| 66 | <input type="checkbox"/> | MA_M2M_0706_R | <a href="#">1436875_at</a>   | <i>Dnm3</i>          | dynamamin 3; mid 3' UTR                                                                                   | Chr1: 161.990252  | 5.813  | 45 | 22.6 | Chr2: 70.716531  | 0.098  |
| 67 | <input type="checkbox"/> | MA_M2M_0706_R | <a href="#">1456822_at</a>   | <i>Rad23b</i>        | RAD23b homolog (S. cerevisiae)                                                                            | Chr4: 55.368023   | 5.938  | 45 | 12.2 | Chr2: 69.724603  | 0.087  |
| 68 | <input type="checkbox"/> | MA_M2M_0706_R | <a href="#">1420384_at</a>   | <i>Col4a3bp</i>      | procollagen, type IV, alpha 3 (Goodpasture antigen) binding protein                                       | Chr13: 96.638320  | 7.742  | 45 | 12.0 | Chr5: 25.445855  | 0.228  |
| 69 | <input type="checkbox"/> | MA_M2M_0706_R | <a href="#">1446330_at</a>   | <i>BC042698</i>      | cDNA sequence BC042698 in DENN/MADD domain containing 1B; from EST AK031618 in Dennd1b 5' UTR or promoter | Chr1: 138.971274  | 6.366  | 45 | 10.5 | Chr7: 89.835648  | -0.073 |
| 70 | <input type="checkbox"/> | MA_M2M_0706_R | <a href="#">1438634_x_at</a> | <i>Lasp1</i>         | LIM and SH3 protein 1; distal 3' UTR                                                                      | Chr11: 97.838653  | 11.906 | 45 | 10.7 | Chr2: 113.445288 | 0.199  |
| 71 | <input type="checkbox"/> | MA_M2M_0706_R | <a href="#">1445481_at</a>   | <i>Slc8a1</i>        | solute carrier family 8 (sodium/calcium exchanger), member 1                                              | Chr17: 81.515399  | 7.508  | 45 | 12.7 | Chr2: 107.153805 | 0.231  |
| 72 | <input type="checkbox"/> | MA_M2M_0706_R | <a href="#">1443926_at</a>   | <i>Mrg1</i>          | myeloid ecotropic viral integration                                                                       | Chr2: 116.046304  | 6.209  | 45 | 13.4 | Chr14:           | -0.106 |

|                                |                   |                              |                 |                                                                                           |                      |            |    |      |                     |            |
|--------------------------------|-------------------|------------------------------|-----------------|-------------------------------------------------------------------------------------------|----------------------|------------|----|------|---------------------|------------|
|                                |                   |                              |                 | site-related gene 1;<br>intron 7                                                          |                      |            |    |      | 78.38<br>3350       |            |
| 73<br><input type="checkbox"/> | MA_M2M<br>_0706_R | <a href="#">1457505_at</a>   | <i>Utrn</i>     | utrophin; first intron                                                                    | Chr10:<br>12.788878  | 6.5<br>31  | 45 | 10.5 | Chr9:<br>118.00000  | -<br>0.064 |
| 74<br><input type="checkbox"/> | MA_M2M<br>_0706_R | <a href="#">1444563_at</a>   | <i>AW494124</i> | ESTs                                                                                      | Chr2:<br>167.348354  | 8.0<br>82  | 45 | 12.3 | Chr2:<br>80.327515  | -<br>0.125 |
| 75<br><input type="checkbox"/> | MA_M2M<br>_0706_R | <a href="#">1457233_at</a>   | <i>Dnaja2</i>   | DnaJ (Hsp40)<br>homolog, subfamily<br>A, member 2                                         | Chr8:<br>85.554238   | 8.7<br>31  | 45 | 17.9 | Chr8:<br>83.183208  | -<br>0.170 |
| 76<br><input type="checkbox"/> | MA_M2M<br>_0706_R | <a href="#">1440013_at</a>   | <i>Trim44</i>   | tripartite motif-<br>containing 44                                                        | Chr2:<br>102.326920  | 7.3<br>96  | 45 | 11.1 | Chr2:<br>169.891672 | 0.114      |
| 77<br><input type="checkbox"/> | MA_M2M<br>_0706_R | <a href="#">1442381_at</a>   | <i>Mkln1</i>    | muskelin 1,<br>intracellular<br>mediator containing<br>kelch motifs; last<br>intron       | Chr6:<br>31.505617   | 6.1<br>79  | 45 | 14.7 | Chr11:<br>48.117381 | 0.071      |
| 78<br><input type="checkbox"/> | MA_M2M<br>_0706_R | <a href="#">1423939_a_at</a> | <i>Yif1</i>     | Yip1 interacting<br>factor homolog (S.<br>cerevisiae)                                     | Chr19:<br>5.092408   | 12.<br>686 | 45 | 10.8 | Chr2:<br>78.100320  | -<br>0.107 |
| 79<br><input type="checkbox"/> | MA_M2M<br>_0706_R | <a href="#">1423714_at</a>   | <i>Asf1b</i>    | ASF1 anti-silencing<br>function 1 homolog<br>B (histone<br>chaperone); 3' UTR             | Chr8:<br>83.969636   | 8.0<br>22  | 45 | 11.1 | ChrX:<br>115.338127 | 0.073      |
| 80<br><input type="checkbox"/> | MA_M2M<br>_0706_R | <a href="#">1429764_at</a>   | <i>Fam101b</i>  | family with<br>sequence similarity<br>101 member B<br>(regulator of filamin<br>protein B) | Chr11:<br>76.021768  | 10.<br>851 | 45 | 10.7 | Chr17:<br>16.345499 | -<br>0.226 |
| 81<br><input type="checkbox"/> | MA_M2M<br>_0706_R | <a href="#">1455463_at</a>   | <i>Phyhip</i>   | phytanoyl-CoA<br>hydroxylase<br>interacting protein;<br>distal 3' UTR                     | Chr14:<br>70.468254  | 7.4<br>22  | 45 | 9.1  | Chr5:<br>139.505838 | 0.176      |
| 82<br><input type="checkbox"/> | MA_M2M<br>_0706_R | <a href="#">1424013_at</a>   | <i>Etf1</i>     | eukaryotic<br>translation<br>termination factor 1;<br>far 3' UTR                          | Chr18:<br>34.902978  | 10.<br>839 | 45 | 13.8 | Chr2:<br>100.989316 | -<br>0.089 |
| 83<br><input type="checkbox"/> | MA_M2M<br>_0706_R | <a href="#">1437577_at</a>   | <i>Bicd1</i>    | bicaudal D homolog<br>1 (Drosophila)                                                      | Chr11:<br>23.342425  | 7.3<br>99  | 45 | 10.2 | Chr14:<br>39.833599 | -<br>0.138 |
| 84<br><input type="checkbox"/> | MA_M2M<br>_0706_R | <a href="#">1454608_x_at</a> | <i>Ttr</i>      | transthyretin<br>(prealbumin);<br>proximal 3' UTR                                         | Chr18:<br>20.673768  | 11.<br>921 | 45 | 46.6 | Chr18:<br>16.414681 | -<br>3.283 |
| 85<br><input type="checkbox"/> | MA_M2M<br>_0706_R | <a href="#">1452392_a_at</a> | <i>Wipi1</i>    | WD repeat domain<br>phosphoinositide-<br>interacting protein 1                            | Chr11:<br>109.576654 | 7.2<br>17  | 45 | 10.3 | Chr5:<br>131.5      | -<br>0.099 |

|                                |               |                              |                      |                                                                                                        |                  |        |    |      |                  |        |
|--------------------------------|---------------|------------------------------|----------------------|--------------------------------------------------------------------------------------------------------|------------------|--------|----|------|------------------|--------|
|                                |               |                              |                      |                                                                                                        |                  |        |    |      | 41036            |        |
| 86<br><input type="checkbox"/> | MA_M2M_0706_R | <a href="#">1420583_a_at</a> | <i>Rora</i>          | retinoic acid receptor-related orphan receptor alpha; last four exons and proximal 3' UTR              | Chr9: 69.374033  | 9.232  | 45 | 13.6 | Chr4: 96.896949  | -0.202 |
| 87<br><input type="checkbox"/> | MA_M2M_0706_R | <a href="#">1415990_at</a>   | <i>Vdac2</i>         | voltage-dependent anion channel 2; exons 8 and 10 and 3' UTR                                           | Chr14: 21.840474 | 14.070 | 45 | 14.1 | Chr4: 142.912003 | -0.122 |
| 88<br><input type="checkbox"/> | MA_M2M_0706_R | <a href="#">1444175_at</a>   | <i>Arfgef1</i>       | ADP-ribosylation factor guanine nucleotide-exchange factor 1(brefeldin A-inhibited); intron (SNP-free) | Chr1: 10.197091  | 6.092  | 45 | 10.8 | Chr2: 166.630386 | 0.076  |
| 89<br><input type="checkbox"/> | MA_M2M_0706_R | <a href="#">1426485_at</a>   | <i>Ubx2</i>          | UBX domain containing 2                                                                                | Chr1: 128.258830 | 10.472 | 45 | 12.3 | Chr2: 145.281646 | 0.237  |
| 90<br><input type="checkbox"/> | MA_M2M_0706_R | <a href="#">1455998_at</a>   | <i>G630041M05Rik</i> | RIKEN cDNA G630041M05 gene                                                                             | Chr1: 133.659801 | 7.579  | 45 | 11.5 | Chr17: 78.355391 | -0.105 |
| 91<br><input type="checkbox"/> | MA_M2M_0706_R | <a href="#">1425523_at</a>   | <i>Rbm25</i>         | RNA binding motif protein 25; exons 1, 2, 3, 4, and 5                                                  | Chr12: 83.644398 | 9.929  | 45 | 8.8  | Chr2: 159.542988 | 0.208  |
| 92<br><input type="checkbox"/> | MA_M2M_0706_R | <a href="#">1456357_at</a>   | <i>Scai</i>          | Scai suppressor of cancer cell invasion; mid 3' UTR (long UTR)                                         | Chr2: 39.069183  | 8.707  | 45 | 12.0 | Chr2: 145.281646 | 0.198  |
| 93<br><input type="checkbox"/> | MA_M2M_0706_R | <a href="#">1421508_at</a>   | <i>Odz1</i>          | odd Oz/ten-m homolog 1                                                                                 | ChrX: 42.532423  | 6.489  | 45 | 17.2 | Chr6: 51.246390  | 0.085  |
| 94<br><input type="checkbox"/> | MA_M2M_0706_R | <a href="#">1426697_a_at</a> | <i>Lrpap1</i>        | low density lipoprotein receptor-related protein associated protein 1; distal 3'UTR                    | Chr5: 35.091708  | 12.273 | 45 | 13.9 | Chr2: 80.327515  | -0.154 |
| 95<br><input type="checkbox"/> | MA_M2M_0706_R | <a href="#">1454338_at</a>   | <i>E130112L15Rik</i> | RIKEN cDNA E130112L15 gene                                                                             | Chr1: 162.713021 | 7.070  | 45 | 13.3 | Chr2: 75.132893  | 0.113  |
| 96<br><input type="checkbox"/> | MA_M2M_0706_R | <a href="#">1448842_at</a>   | <i>Cdo1</i>          | cysteine dioxygenase 1, cytosolic                                                                      | Chr18: 46.713542 | 12.520 | 45 | 19.8 | Chr18: 46.275839 | 0.240  |
| 97<br><input type="checkbox"/> | MA_M2M_0706_R | <a href="#">1423659_a_at</a> | <i>Tbc1d17</i>       | TBC1 domain family, member 17; 3' UTR or last 3 exons                                                  | Chr7: 44.841352  | 9.173  | 45 | 17.6 | Chr3: 54.220900  | 0.119  |

|                                 |               |                              |                      |                                                                                                                        |                   |                |    |      |                  |                |
|---------------------------------|---------------|------------------------------|----------------------|------------------------------------------------------------------------------------------------------------------------|-------------------|----------------|----|------|------------------|----------------|
| 98<br><input type="checkbox"/>  | MA_M2M_0706_R | <a href="#">1446811_at</a>   | <i>9430023B2ORik</i> | RIKEN cDNA 9430023B20 gene                                                                                             | Chr18: 6.964283   | 6.3<br>57      | 45 | 8.3  | Chr5: 131.541036 | 0.0<br>52      |
| 99<br><input type="checkbox"/>  | MA_M2M_0706_R | <a href="#">1453841_at</a>   | <i>Laf4</i>          | lymphoid nuclear protein related to AF4                                                                                | Chr1: 38.554285   | 5.9<br>80      | 45 | 10.6 | Chr6: 43.826811  | 0.0<br>56      |
| 100<br><input type="checkbox"/> | MA_M2M_0706_R | <a href="#">1439304_at</a>   | <i>Pam</i>           | peptidylglycine alpha-amidating monooxygenase; intron 1                                                                | Chr1: 98.045829   | 7.0<br>52      | 45 | 8.7  | Chr4: 156.121747 | 0.1<br>42      |
| 101<br><input type="checkbox"/> | MA_M2M_0706_R | <a href="#">1433862_at</a>   | <i>Espl1</i>         | extra spindle poles-like 1 (S. cerevisiae)                                                                             | Chr15: 102.324051 | 6.4<br>35      | 45 | 9.1  | Chr3: 69.025720  | 0.0<br>55      |
| 102<br><input type="checkbox"/> | MA_M2M_0706_R | <a href="#">1436076_at</a>   | <i>Dlgap1</i>        | discs, large (Drosophila) homolog-associated protein 1; far 3' UTR                                                     | Chr17: 70.820832  | 5.6<br>15      | 45 | 13.6 | Chr2: 70.495989  | 0.0<br>29      |
| 103<br><input type="checkbox"/> | MA_M2M_0706_R | <a href="#">1434637_x_at</a> | <i>Sin3b</i>         | transcriptional regulator, SIN3B (yeast)                                                                               | Chr8: 72.733446   | 10.<br>68<br>0 | 45 | 14.6 | Chr6: 133.936670 | 0.1<br>28      |
| 104<br><input type="checkbox"/> | MA_M2M_0706_R | <a href="#">1453773_at</a>   | <i>4931406I20Rik</i> | RIKEN cDNA 4931406I20 gene                                                                                             | Chr4: 117.285261  | 6.6<br>50      | 45 | 10.3 | Chr2: 70.613187  | -<br>0.0<br>74 |
| 105<br><input type="checkbox"/> | MA_M2M_0706_R | <a href="#">1455913_x_at</a> | <i>Ttr</i>           | transthyretin (prealbumin); proximal 3' UTR                                                                            | Chr18: 20.673783  | 11.<br>07<br>9 | 45 | 48.6 | Chr18: 16.414681 | -<br>3.4<br>71 |
| 106<br><input type="checkbox"/> | MA_M2M_0706_R | <a href="#">1456159_at</a>   | <i>2900045N06Rik</i> | RIKEN cDNA 2900045N06; intron (from EST AK042057)                                                                      | Chr6: 113.131441  | 6.9<br>26      | 45 | 11.9 | Chr11: 50.383261 | 0.0<br>82      |
| 107<br><input type="checkbox"/> | MA_M2M_0706_R | <a href="#">1452270_s_at</a> | <i>Cubn</i>          | cubilin (intrinsic factor-cobalamin receptor)                                                                          | Chr2: 13.276377   | 14.<br>22<br>8 | 45 | 17.2 | ChrX: 102.126656 | 0.1<br>86      |
| 108<br><input type="checkbox"/> | MA_M2M_0706_R | <a href="#">1434801_x_at</a> | <i>Slc25a5</i>       | solute carrier family 25 (mitochondrial carrier, adenine nucleotide translocator), member 5; last two exons and 3' UTR | ChrX: 36.797782   | 15.<br>74<br>6 | 45 | 11.8 | Chr17: 64.993854 | -<br>0.0<br>97 |
| 109<br><input type="checkbox"/> | MA_M2M_0706_R | <a href="#">1456677_at</a>   | <i>Herc4</i>         | hect domain and RLD 4                                                                                                  | Chr10: 63.247211  | 6.3<br>39      | 45 | 10.1 | Chr3: 151.382601 | 0.0<br>66      |
| 110<br><input type="checkbox"/> | MA_M2M_0706_R | <a href="#">1425156_at</a>   | <i>Gbp7</i>          | guanylate binding protein 7                                                                                            | Chr3: 142.546476  | 8.0<br>22      | 45 | 13.7 | Chr3: 139.354330 | 0.1<br>51      |

|     |               |                            |                      |                                                                                              |                   |       |    |      |                   |        |
|-----|---------------|----------------------------|----------------------|----------------------------------------------------------------------------------------------|-------------------|-------|----|------|-------------------|--------|
| 111 | MA_M2M_0706_R | <a href="#">1450324_at</a> | <i>4930521E07Rik</i> | RIKEN cDNA 4930521E07 gene                                                                   | Chr19: 40.605396  | 7.354 | 45 | 10.2 | Chr12: 37.639776  | -0.100 |
| 112 | MA_M2M_0706_R | <a href="#">1430606_at</a> | <i>2310020F24Rik</i> | RIKEN cDNA 2310020F24 gene                                                                   | Chr6: 38.626778   | 8.797 | 45 | 13.9 | Chr1: 62.609193   | 0.112  |
| 113 | MA_M2M_0706_R | <a href="#">1442935_at</a> | <i>C81452</i>        | expressed sequence C81452                                                                    | Chr18: 68.865805  | 6.999 | 45 | 15.0 | Chr16: 44.143640  | 0.079  |
| 114 | MA_M2M_0706_R | <a href="#">1416360_at</a> | <i>Snag1</i>         | sorting nexin associated golgi protein 1 (intracellular trafficking); proximal to mid 3' UTR | Chr13: 113.593598 | 9.791 | 45 | 8.3  | Chr1: 12.938444   | -0.127 |
| 115 | MA_M2M_0706_R | <a href="#">1456831_at</a> | <i>Arid5b</i>        | AT rich interactive domain 5B (Mrf1 like)                                                    | Chr10: 68.152649  | 7.337 | 45 | 9.9  | Chr2: 70.716531   | 0.092  |
| 116 | MA_M2M_0706_R | <a href="#">1436752_at</a> | <i>Tbccd1</i>        | TBCC domain containing 1; 3' UTR                                                             | Chr16: 22.813672  | 8.385 | 45 | 13.2 | Chr6: 16.056743   | -0.110 |
| 117 | MA_M2M_0706_R | <a href="#">1454551_at</a> | <i>9530034D02Rik</i> | RIKEN cDNA 9530034D02 gene                                                                   | Chr6: 31.331295   | 6.427 | 45 | 10.8 | Chr6: 124.528197  | -0.058 |
| 118 | MA_M2M_0706_R | <a href="#">1446692_at</a> | <i>BM115381</i>      | ESTs, Highly similar to S12207 hypothetical protein (B2 element) - mouse [M.musculus]        | Chr11: 77.696209  | 6.167 | 45 | 11.9 | Chr6: 9.348282    | -0.074 |
| 119 | MA_M2M_0706_R | <a href="#">1439816_at</a> | <i>4930418G15Rik</i> | RIKEN cDNA 4930418G15 gene; far 3' UTR or unknown neighboring gene                           | Chr1: 9.960201    | 7.671 | 45 | 47.9 | Chr1: 10.162992   | -0.715 |
| 120 | MA_M2M_0706_R | <a href="#">1442109_at</a> | <i>Fubp1</i>         | far upstream element (FUSE) binding protein 1                                                | Chr3: 152.230778  | 6.470 | 45 | 9.9  | Chr7: 19.429957   | 0.152  |
| 121 | MA_M2M_0706_R | <a href="#">1432448_at</a> | <i>2600006K01Rik</i> | RIKEN cDNA 2600006K01 gene                                                                   | Chr2: 29.868759   | 6.842 | 45 | 8.0  | Chr12: 115.550550 | 0.069  |
| 122 | MA_M2M_0706_R | <a href="#">1438265_at</a> | <i>4930413O22Rik</i> | RIKEN cDNA 4930413O22 gene                                                                   | Chr1: 10.070038   | 7.737 | 45 | 9.4  | Chr2: 76.018672   | 0.180  |
| 123 | MA_M2M_0706_R | <a href="#">1418432_at</a> | <i>Cab39</i>         | calcium binding protein 39                                                                   | Chr1: 85.849462   | 9.316 | 45 | 9.9  | Chr2: 70.716531   | 0.174  |



|                                 |               |                              |                  |                                                                                                                            |                  |        |    |      |                   |        |
|---------------------------------|---------------|------------------------------|------------------|----------------------------------------------------------------------------------------------------------------------------|------------------|--------|----|------|-------------------|--------|
| 124<br><input type="checkbox"/> | MA_M2M_0706_R | <a href="#">1460380_at</a>   | <i>Dsg2</i>      | desmoglein 2 (calcium-binding transmembrane glycoprotein, arrhythmogenic right ventricular dysplasia, familial 10)         | Chr18: 20.602254 | 7.394  | 45 | 8.0  | Chr15: 102.320887 | 0.069  |
| 125<br><input type="checkbox"/> | MA_M2M_0706_R | <a href="#">1431616_at</a>   | <i>Catsperg2</i> | catsper channel auxiliary subunit gamma 2                                                                                  | Chr7: 29.723821  | 6.441  | 45 | 11.8 | Chr12: 37.639776  | -0.074 |
| 126<br><input type="checkbox"/> | MA_M2M_0706_R | <a href="#">1451494_at</a>   | <i>Wac</i>       | WW domain containing adaptor with coiled-coil; exons 12 and 14, and proximal 3' UTR                                        | Chr18: 7.926111  | 10.545 | 45 | 11.2 | Chr18: 61.000000  | -0.172 |
| 127<br><input type="checkbox"/> | MA_M2M_0706_R | <a href="#">1458239_at</a>   | <i>E2f1</i>      | adult male testis cDNA, RIKEN full-length enriched library, clone:4930408L20 product:unclassifiable, full insert sequence. | Chr7: 24.131364  | 6.375  | 45 | 12.3 | Chr10: 110.416695 | -0.093 |
| 128<br><input type="checkbox"/> | MA_M2M_0706_R | <a href="#">1446556_at</a>   | <i>Kcnd1</i>     | potassium voltage-gated channel, Shal-related family, member 1                                                             | ChrX: 7.837757   | 7.036  | 45 | 11.2 | Chr6: 43.826811   | 0.080  |
| 129<br><input type="checkbox"/> | MA_M2M_0706_R | <a href="#">1444852_at</a>   | <i>Fmo4</i>      | flavin containing monooxygenase 4; antisense in 5' UTR                                                                     | Chr1: 162.812624 | 6.618  | 45 | 17.0 | Chr2: 79.343444   | -0.056 |
| 130<br><input type="checkbox"/> | MA_M2M_0706_R | <a href="#">1444660_at</a>   | <i>Kiaa1109</i>  | transmembrane protein KIAA1109; intronic or AK085090                                                                       | Chr3: 37.023574  | 7.665  | 45 | 13.8 | Chr7: 107.293974  | -0.159 |
| 131<br><input type="checkbox"/> | MA_M2M_0706_R | <a href="#">1420326_s_at</a> | <i>Cramp1l</i>   | Crm, cramped-like; putative far 3' UTR (from Homo CRAMP1L)                                                                 | Chr17: 24.961389 | 8.842  | 45 | 11.3 | Chr6: 124.528197  | -0.124 |
| 132<br><input type="checkbox"/> | MA_M2M_0706_R | <a href="#">1455122_at</a>   | <i>Ptchd2</i>    | patched domain containing 2; distal 3' UTR                                                                                 | Chr4: 148.240780 | 7.440  | 45 | 9.6  | Chr6: 125.820102  | 0.106  |
| 133<br><input type="checkbox"/> | MA_M2M_0706_R | <a href="#">1434088_at</a>   | <i>Zkscan17</i>  | zinc finger with KRAB and SCAN domains 17; distal 3' UTR                                                                   | Chr11: 59.485589 | 9.209  | 45 | 15.2 | Chr1: 17.259053   | 0.102  |
| 134<br><input type="checkbox"/> | MA_M2M_0706_R | <a href="#">1448856_a_at</a> | <i>Msra</i>      | methionine sulfoxide reductase A; 3' UTR                                                                                   | Chr14: 64.122780 | 13.992 | 45 | 13.2 | Chr15: 93.021696  | 0.125  |

|                                 |               |                              |                |                                                                                                                        |                  |        |    |      |                    |        |
|---------------------------------|---------------|------------------------------|----------------|------------------------------------------------------------------------------------------------------------------------|------------------|--------|----|------|--------------------|--------|
| 135<br><input type="checkbox"/> | MA_M2M_0706_R | <a href="#">1423772_x_at</a> | <i>Slc25a5</i> | solute carrier family 25 (mitochondrial carrier, adenine nucleotide translocator), member 5; last two exons and 3' UTR | ChrX: 36.797736  | 16.017 | 45 | 12.0 | Chr14 : 39.833599  | 0.090  |
| 136<br><input type="checkbox"/> | MA_M2M_0706_R | <a href="#">1427309_at</a>   | <i>Pars2</i>   | prolyl-tRNA synthetase (mitochondrial); 3' UTR                                                                         | Chr4: 106.654706 | 8.910  | 45 | 12.3 | Chr5: 21.026344    | -0.110 |
| 137<br><input type="checkbox"/> | MA_M2M_0706_R | <a href="#">1456898_at</a>   | <i>Pura</i>    | purine rich element binding protein A; far 3' UTR element associated with Pura                                         | Chr18: 36.292229 | 10.045 | 45 | 9.8  | Chr2: 11.785864    | -0.197 |
| 138<br><input type="checkbox"/> | MA_M2M_0706_R | <a href="#">1452094_at</a>   | <i>P4ha1</i>   | procollagen-proline, 2-oxoglutarate 4-dioxygenase (proline 4-hydroxylase), alpha 1 polypeptide                         | Chr10: 59.371376 | 8.772  | 45 | 11.6 | Chr2: 131.056131   | 0.185  |
| 139<br><input type="checkbox"/> | MA_M2M_0706_R | <a href="#">1451485_at</a>   | <i>Luc7l3</i>  | LUC7-like 3 (cAMP regulatory element-associated protein 1); exons 4, 5, and 7                                          | Chr11: 94.297787 | 7.421  | 45 | 15.0 | Chr2: 178.717318   | 0.227  |
| 140<br><input type="checkbox"/> | MA_M2M_0706_R | <a href="#">1452734_at</a>   | <i>Rnaset2</i> | ribonuclease T2                                                                                                        | Chr17: 6.988754  | 14.725 | 45 | 13.7 | Chr17 : 9.373070   | 0.112  |
| 141<br><input type="checkbox"/> | MA_M2M_0706_R | <a href="#">1417131_at</a>   | <i>Cdc25a</i>  | cell division cycle 25 homolog A (S. cerevisiae)                                                                       | Chr9: 109.892195 | 7.953  | 45 | 12.3 | Chr2: 70.495989    | 0.092  |
| 142<br><input type="checkbox"/> | MA_M2M_0706_R | <a href="#">1457122_at</a>   | <i>Glmr</i>    | ESTs                                                                                                                   | Chr2: 48.971554  | 5.635  | 45 | 11.0 | Chr7: 6.024860     | 0.073  |
| 143<br><input type="checkbox"/> | MA_M2M_0706_R | <a href="#">1436535_at</a>   | <i>Ssa2</i>    | Sjogren syndrome antigen A2                                                                                            | Chr1: 143.752721 | 8.332  | 45 | 14.8 | Chr2: 78.100320    | 0.272  |
| 144<br><input type="checkbox"/> | MA_M2M_0706_R | <a href="#">1424089_a_at</a> | <i>Tcf4</i>    | transcription factor 4; last three exons and proximal 3' UTR                                                           | Chr18: 69.681618 | 7.593  | 45 | 12.9 | Chr10 : 115.872274 | 0.131  |
| 145<br><input type="checkbox"/> | MA_M2M_0706_R | <a href="#">1423160_at</a>   | <i>Spred1</i>  | sprouty protein with EVH-1 domain 1, related sequence                                                                  | Chr2: 117.180081 | 10.174 | 45 | 12.1 | Chr12 : 38.632033  | 0.109  |
| 146<br><input type="checkbox"/> | MA_M2M_0706_R | <a href="#">1425505_at</a>   | <i>Mylk</i>    | myosin, light polypeptide kinase; last 3 exons                                                                         | Chr16: 34.995087 | 8.931  | 45 | 16.5 | Chr10 : 111.073834 | 0.188  |

|                                 |               |                              |                      |                                                                                                                                                                              |                   |        |    |      |                  |        |
|---------------------------------|---------------|------------------------------|----------------------|------------------------------------------------------------------------------------------------------------------------------------------------------------------------------|-------------------|--------|----|------|------------------|--------|
| 147<br><input type="checkbox"/> | MA_M2M_0706_R | <a href="#">1441575_at</a>   | <i>A630049H14Rik</i> | 12 days embryo male wolffian duct includes surrounding region cDNA, RIKEN full-length enriched library, clone:6720485J18 product:hypothetical protein, full insert sequence. | Chr10: 9.532566   | 6.187  | 45 | 7.0  | Chr1: 98.793301  | 0.036  |
| 148<br><input type="checkbox"/> | MA_M2M_0706_R | <a href="#">1440841_at</a>   | <i>Ywhae</i>         | tyrosine 3-monooxygenase/tryptophan 5-monooxygenase activation protein, epsilon polypeptide                                                                                  | Chr11: 75.743295  | 8.181  | 45 | 7.8  | Chr7: 104.149021 | -0.171 |
| 149<br><input type="checkbox"/> | MA_M2M_0706_R | <a href="#">1429505_at</a>   | <i>2310076G13Rik</i> | RIKEN cDNA 2310076G13 gene                                                                                                                                                   | Chr1: 60.336817   | 10.283 | 45 | 15.7 | Chr2: 76.018672  | 0.293  |
| 150<br><input type="checkbox"/> | MA_M2M_0706_R | <a href="#">1459218_at</a>   | <i>D330001F17Rik</i> | RIKEN cDNA D330001F17 gene                                                                                                                                                   | Chr15: 76.409024  | 6.705  | 45 | 11.1 | Chr1: 62.609193  | 0.098  |
| 151<br><input type="checkbox"/> | MA_M2M_0706_R | <a href="#">1429969_at</a>   | <i>Gimap5</i>        | GTPase, IMAP family member 5                                                                                                                                                 | Chr6: 48.755881   | 6.371  | 45 | 15.8 | Chr6: 9.348282   | 0.054  |
| 152<br><input type="checkbox"/> | MA_M2M_0706_R | <a href="#">1425686_at</a>   | <i>Cflar</i>         | CASP8 and FADD-like apoptosis regulator                                                                                                                                      | Chr1: 58.754123   | 9.561  | 45 | 9.5  | Chr2: 159.542988 | 0.297  |
| 153<br><input type="checkbox"/> | MA_M2M_0706_R | <a href="#">1455560_at</a>   | <i>AK154427</i>      | AK154427 thymus EST                                                                                                                                                          | Chr9: 22.085563   | 7.087  | 45 | 9.1  | Chr3: 65.524002  | 0.100  |
| 154<br><input type="checkbox"/> | MA_M2M_0706_R | <a href="#">1418331_at</a>   | <i>1110031I02Rik</i> | RIKEN cDNA 1110031I02 gene                                                                                                                                                   | Chr11: 121.177920 | 10.929 | 45 | 9.5  | Chr1: 22.104486  | 0.094  |
| 155<br><input type="checkbox"/> | MA_M2M_0706_R | <a href="#">1455580_at</a>   | <i>Usp6nl</i>        | USP6 N-terminal like; distal 3' UTR                                                                                                                                          | Chr2: 6.443279    | 9.892  | 45 | 10.5 | Chr6: 6.060085   | -0.094 |
| 156<br><input type="checkbox"/> | MA_M2M_0706_R | <a href="#">1454178_at</a>   | <i>2610027F03Rik</i> | RIKEN cDNA 2610027F03 gene                                                                                                                                                   | Chr1: 120.688646  | 7.548  | 45 | 14.2 | Chr5: 27.285288  | 0.055  |
| 157<br><input type="checkbox"/> | MA_M2M_0706_R | <a href="#">1438669_at</a>   | <i>Dcaf12</i>        | DDB1 and CUL4 associated factor 12; mid-distal 3' UTR                                                                                                                        | Chr4: 41.291464   | 9.815  | 45 | 13.2 | Chr2: 70.716531  | 0.142  |
| 158<br><input type="checkbox"/> | MA_M2M_0706_R | <a href="#">1450359_at</a>   | <i>Fut1</i>          | fucosyltransferase 1                                                                                                                                                         | Chr7: 45.619178   | 6.890  | 45 | 10.6 | Chr5: 139.505838 | 0.109  |
| 159<br><input type="checkbox"/> | MA_M2M_0706_R | <a href="#">1419572_a_at</a> | <i>Abcd4</i>         | ATP-binding cassette, sub-family D (ALD), member 4;                                                                                                                          | Chr12: 84.602794  | 8.811  | 45 | 9.5  | Chr2: 69.342849  | -0.138 |

|          |               |                              |                      |                                                                                                           |                   |        |    |      |                   |        |
|----------|---------------|------------------------------|----------------------|-----------------------------------------------------------------------------------------------------------|-------------------|--------|----|------|-------------------|--------|
|          |               |                              |                      | last two exons and 3' UTR                                                                                 |                   |        |    |      |                   |        |
| 160<br>☐ | MA_M2M_0706_R | <a href="#">142677_a_at</a>  | <i>Wasl</i>          | Wiskott-Aldrich syndrome-like (human)                                                                     | Chr6: 24.637670   | 10.201 | 45 | 10.4 | Chr2: 145.281646  | 0.256  |
| 161<br>☐ | MA_M2M_0706_R | <a href="#">1437091_at</a>   | <i>Accn4</i>         | amiloride-sensitive cation channel 4, pituitary; 3' UTR                                                   | Chr1: 75.473751   | 7.866  | 45 | 9.5  | Chr4: 121.044402  | 0.116  |
| 162<br>☐ | MA_M2M_0706_R | <a href="#">1457392_at</a>   | <i>Sfrs12</i>        | splicing factor, arginine/serine-rich 12                                                                  | Chr13: 103.740866 | 6.700  | 45 | 13.0 | Chr15: 101.561023 | -0.064 |
| 163<br>☐ | MA_M2M_0706_R | <a href="#">1423775_s_at</a> | <i>Prc1</i>          | protein regulator of cytokinesis 1                                                                        | Chr7: 80.315784   | 7.776  | 45 | 9.4  | Chr3: 65.524002   | 0.073  |
| 164<br>☐ | MA_M2M_0706_R | <a href="#">1447571_at</a>   | <i>Elk4</i>          | ELK4, member of ETS oncogene family                                                                       | Chr1: 132.026246  | 10.159 | 45 | 8.4  | Chr2: 70.613187   | -0.089 |
| 165<br>☐ | MA_M2M_0706_R | <a href="#">1455585_at</a>   | <i>Rnf168</i>        | ring finger protein 168                                                                                   | Chr16: 32.300484  | 8.277  | 45 | 11.7 | Chr5: 133.062783  | -0.099 |
| 166<br>☐ | MA_M2M_0706_R | <a href="#">1417892_a_at</a> | <i>Sirt3</i>         | sirtuin 3 (NAD-dependent deacetylase); second to last exon and 3' UTR                                     | Chr7: 140.863700  | 12.082 | 45 | 10.4 | Chr15: 93.360915  | 0.139  |
| 167<br>☐ | MA_M2M_0706_R | <a href="#">1450968_at</a>   | <i>Uqcrrf1</i>       | ubiquinol-cytochrome c reductase, Rieske iron-sulfur polypeptide 1; exon and 3'UTR                        | Chr13: 30.540651  | 15.420 | 45 | 7.5  | Chr6: 124.528197  | 0.070  |
| 168<br>☐ | MA_M2M_0706_R | <a href="#">1449995_at</a>   | <i>4933421I07Rik</i> | RIKEN cDNA 4933421I07 gene                                                                                | Chr7: 42.445522   | 7.164  | 45 | 8.4  | Chr14: 39.724852  | 0.115  |
| 169<br>☐ | MA_M2M_0706_R | <a href="#">1457041_at</a>   | <i>1700026B2ORik</i> | small nucleolar RNA host gene (non-protein coding) 10 (similar to human small Cajal body-specific RNA 13_ | Chr12: 105.030533 | 7.387  | 45 | 9.7  | Chr1: 37.639250   | 0.093  |
| 170<br>☐ | MA_M2M_0706_R | <a href="#">1458385_at</a>   | <i>Hspa4l</i>        | heat shock protein 4 like                                                                                 | Chr3: 40.791144   | 7.199  | 45 | 13.7 | Chr2: 69.724603   | 0.166  |
| 171<br>☐ | MA_M2M_0706_R | <a href="#">1439890_at</a>   | <i>Fbxl7</i>         | F-box and leucine-rich repeat protein 7                                                                   | Chr15: 26.543518  | 7.782  | 45 | 9.5  | Chr9: 29.939029   | 0.106  |

|                                 |               |                              |                      |                                                                                        |                   |        |    |      |                   |        |
|---------------------------------|---------------|------------------------------|----------------------|----------------------------------------------------------------------------------------|-------------------|--------|----|------|-------------------|--------|
| 172<br><input type="checkbox"/> | MA_M2M_0706_R | <a href="#">1459542_at</a>   | <i>Prkg1</i>         | protein kinase, cGMP-dependent, type I; antisense in intron (poor probe set)           | Chr19: 30.648761  | 5.800  | 45 | 12.8 | Chr1: 3.010274    | 0.060  |
| 173<br><input type="checkbox"/> | MA_M2M_0706_R | <a href="#">1424768_at</a>   | <i>Cald1</i>         | caldesmon 1; mid 3' UTR                                                                | Chr6: 34.773553   | 9.057  | 45 | 11.7 | Chr15: 91.405127  | -0.395 |
| 174<br><input type="checkbox"/> | MA_M2M_0706_R | <a href="#">1447195_at</a>   | <i>Elp4</i>          | elongation protein 4 homolog (S. cerevisiae)                                           | Chr2: 105.732360  | 6.640  | 45 | 6.9  | Chr16: 44.143640  | 0.091  |
| 175<br><input type="checkbox"/> | MA_M2M_0706_R | <a href="#">1456908_at</a>   | <i>BC023202</i>      | clone IMAGE:3986405, mRNA                                                              | Chr12: 24.963801  | 8.152  | 45 | 15.1 | Chr2: 159.542988  | -0.084 |
| 176<br><input type="checkbox"/> | MA_M2M_0706_R | <a href="#">1419529_at</a>   | <i>Il23a</i>         | interleukin 23, alpha subunit p19                                                      | Chr10: 128.296260 | 6.355  | 45 | 9.5  | Chr2: 18.263847   | 0.054  |
| 177<br><input type="checkbox"/> | MA_M2M_0706_R | <a href="#">1415864_at</a>   | <i>Bpgm</i>          | 2,3-bisphosphoglycerate mutase; proximal 3' UTR (possible 3' UTR length variants)      | Chr6: 34.504547   | 8.883  | 45 | 11.5 | Chr14: 39.196761  | -0.210 |
| 178<br><input type="checkbox"/> | MA_M2M_0706_R | <a href="#">1453565_at</a>   | <i>Ndufab1</i>       | NADH dehydrogenase (ubiquinone) 1, alpha/beta subcomplex, 1                            | Chr7: 122.086560  | 5.941  | 45 | 9.5  | Chr2: 70.495989   | 0.102  |
| 179<br><input type="checkbox"/> | MA_M2M_0706_R | <a href="#">1448021_at</a>   | <i>Fam46c</i>        | family with sequence similarity 46, member C (protein LOC54855); far 3' UTR (putative) | Chr3: 100.468088  | 6.889  | 45 | 14.0 | Chr17: 71.025688  | 0.201  |
| 180<br><input type="checkbox"/> | MA_M2M_0706_R | <a href="#">1453176_a_at</a> | <i>4933404M02Rik</i> | RIKEN cDNA 4933404M02 gene                                                             | Chr2: 70.531732   | 6.606  | 45 | 9.5  | Chr5: 139.505838  | 0.094  |
| 181<br><input type="checkbox"/> | MA_M2M_0706_R | <a href="#">1415814_at</a>   | <i>Atp6v1b2</i>      | ATPase, H+ transporting, V1 subunit B, isoform 2; distal half of 3' UTR                | Chr8: 69.113124   | 13.207 | 45 | 10.5 | Chr15: 93.021696  | 0.121  |
| 182<br><input type="checkbox"/> | MA_M2M_0706_R | <a href="#">1452378_at</a>   | <i>Ramp2</i>         | receptor (calcitonin) activity modifying protein 2                                     | Chr19: 5.800664   | 8.889  | 45 | 7.1  | Chr2: 69.724603   | 0.276  |
| 183<br><input type="checkbox"/> | MA_M2M_0706_R | <a href="#">1443212_at</a>   | <i>Large</i>         | like-glycosyltransferase; intron 1                                                     | Chr8: 73.329777   | 6.474  | 45 | 17.2 | Chr10: 116.134021 | 0.055  |

|                                 |               |                            |                      |                                                                                                                                  |                   |       |    |      |                   |        |
|---------------------------------|---------------|----------------------------|----------------------|----------------------------------------------------------------------------------------------------------------------------------|-------------------|-------|----|------|-------------------|--------|
| 184<br><input type="checkbox"/> | MA_M2M_0706_R | <a href="#">1425315_at</a> | <i>Sox12</i>         | SRY-box containing gene 12                                                                                                       | Chr4: 98.992637   | 5.972 | 45 | 9.0  | Chr2: 18.263847   | -0.077 |
| 185<br><input type="checkbox"/> | MA_M2M_0706_R | <a href="#">1439840_at</a> | <i>Polb</i>          | polymerase (DNA directed), beta                                                                                                  | Chr8: 22.644913   | 6.740 | 45 | 13.5 | Chr15: 93.360915  | -0.174 |
| 186<br><input type="checkbox"/> | MA_M2M_0706_R | <a href="#">1459888_at</a> | <i>AI429562</i>      | oviduct EST AK143260                                                                                                             | Chr18: 61.647204  | 7.503 | 45 | 10.8 | Chr1: 39.140420   | 0.101  |
| 187<br><input type="checkbox"/> | MA_M2M_0706_R | <a href="#">1426817_at</a> | <i>Mki67</i>         | Mki67 protein (stem cell marker); last exon and proximal 3' UTR                                                                  | Chr7: 135.689846  | 7.079 | 45 | 11.6 | Chr2: 157.995222  | -0.110 |
| 188<br><input type="checkbox"/> | MA_M2M_0706_R | <a href="#">1444971_at</a> | <i>Rbm5</i>          | RNA binding motif protein 5 (renal carcinoma antigen NY-REN-9); rare transcript                                                  | Chr9: 107.764397  | 6.503 | 45 | 13.5 | Chr4: 59.850763   | -0.112 |
| 189<br><input type="checkbox"/> | MA_M2M_0706_R | <a href="#">1446508_at</a> | <i>D430017M14Rik</i> | 13 days embryo male testis cDNA, RIKEN full-length enriched library, clone:6030447N08 product:unknown EST, full insert sequence. | Chr15: 68.343881  | 7.051 | 45 | 17.1 | Chr4: 88.045738   | -0.120 |
| 190<br><input type="checkbox"/> | MA_M2M_0706_R | <a href="#">1444678_at</a> | <i>2810403D21Rik</i> | RIKEN cDNA 2810403D21 gene                                                                                                       | ChrX: 108.874391  | 5.599 | 45 | 14.1 | Chr9: 105.774381  | 0.035  |
| 191<br><input type="checkbox"/> | MA_M2M_0706_R | <a href="#">1439638_at</a> | <i>ErbB2ip</i>       | ErbB2 interacting protein                                                                                                        | Chr13: 103.825620 | 6.490 | 45 | 8.9  | Chr2: 78.100320   | 0.161  |
| 192<br><input type="checkbox"/> | MA_M2M_0706_R | <a href="#">1458818_at</a> | <i>D3ErtD162e</i>    | DNA segment, Chr 3, ERATO Doi 162, expressed                                                                                     | Chr3: 132.353460  | 7.555 | 45 | 9.1  | Chr5: 139.505838  | 0.098  |
| 193<br><input type="checkbox"/> | MA_M2M_0706_R | <a href="#">1442322_at</a> | <i>Slit2</i>         | slit guidance ligand 2; intron                                                                                                   | Chr5: 48.103982   | 7.037 | 45 | 12.7 | Chr13: 103.151983 | 0.076  |
| 194<br><input type="checkbox"/> | MA_M2M_0706_R | <a href="#">1456796_at</a> | <i>Snai3</i>         | snail homolog 3 (Drosophila)                                                                                                     | Chr8: 122.454257  | 7.737 | 45 | 11.3 | Chr2: 134.800968  | -0.059 |
| 195<br><input type="checkbox"/> | MA_M2M_0706_R | <a href="#">1445337_at</a> | <i>Dnajc13</i>       | DnaJ (Hsp40) homolog, subfamily C, member 13; three central exons                                                                | Chr9: 104.228418  | 8.083 | 45 | 12.2 | Chr1: 12.938444   | -0.245 |

|     |               |                              |                      |                                                                                                                                  |                  |        |    |      |                   |        |
|-----|---------------|------------------------------|----------------------|----------------------------------------------------------------------------------------------------------------------------------|------------------|--------|----|------|-------------------|--------|
| 196 | MA_M2M_0706_R | <a href="#">1444004_at</a>   | <i>Thoc2</i>         | THO complex 2 (TREX (transcription/export complex); three exons of a short form variant                                          | ChrX: 41.827241  | 8.640  | 45 | 16.9 | Chr7: 6.677334    | 0.428  |
| 197 | MA_M2M_0706_R | <a href="#">1439095_at</a>   | <i>Sfrs11</i>        | splicing factor, arginine/serine-rich 11                                                                                         | Chr3: 158.024742 | 8.110  | 45 | 8.5  | Chr5: 21.748772   | 0.131  |
| 198 | MA_M2M_0706_R | <a href="#">1460726_at</a>   | <i>Adss</i>          | adenylosuccinate synthetase, non muscle                                                                                          | Chr1: 177.763572 | 11.601 | 45 | 12.8 | Chr2: 15.000000   | 0.133  |
| 199 | MA_M2M_0706_R | <a href="#">1444090_at</a>   | <i>4632424B03Rik</i> | RIKEN cDNA 4632423N09 gene                                                                                                       | Chr17: 33.644988 | 7.559  | 45 | 8.3  | Chr6: 125.820102  | 0.091  |
| 200 | MA_M2M_0706_R | <a href="#">1442595_at</a>   | <i>5830405N20Rik</i> | RIKEN cDNA 5830405N20 gene                                                                                                       | Chr7: 84.580663  | 6.321  | 45 | 13.6 | Chr3: 53.269732   | 0.092  |
| 201 | MA_M2M_0706_R | <a href="#">1460619_at</a>   | <i>4931419K03Rik</i> | RIKEN cDNA 4931419K03 gene                                                                                                       | Chr1: 40.772316  | 8.816  | 45 | 10.6 | ChrX: 50.932422   | 0.187  |
| 202 | MA_M2M_0706_R | <a href="#">1431008_at</a>   | <i>H2-Q1</i>         | histocompatibility 2, Q region locus 1                                                                                           | Chr17: 35.384916 | 10.084 | 45 | 21.0 | Chr13: 110.449360 | -0.462 |
| 203 | MA_M2M_0706_R | <a href="#">1451449_at</a>   | <i>4933407N01Rik</i> | RIKEN cDNA 4933407N01 gene                                                                                                       | Chr11: 30.931644 | 10.554 | 45 | 11.5 | Chr7: 36.693524   | -0.159 |
| 204 | MA_M2M_0706_R | <a href="#">1450646_at</a>   | <i>Cyp51a1</i>       | cytochrome P450, family 51, subfamily A, polypeptide 1 (endoplasmic reticulum, lanosterol 14-alpha demethylase); proximal 3' UTR | Chr5: 4.082591   | 11.949 | 45 | 14.1 | Chr12: 84.895759  | 0.217  |
| 205 | MA_M2M_0706_R | <a href="#">1427302_at</a>   | <i>Enpp3</i>         | ectonucleotide pyrophosphatase/phosphodiesterase 3                                                                               | Chr10: 24.774787 | 10.693 | 45 | 21.0 | Chr8: 86.388770   | 0.168  |
| 206 | MA_M2M_0706_R | <a href="#">1425776_a_at</a> | <i>C87436</i>        | expressed sequence C87436                                                                                                        | Chr6: 86.469778  | 7.815  | 45 | 10.8 | Chr9: 115.524788  | 0.097  |
| 207 | MA_M2M_0706_R | <a href="#">1444826_at</a>   | <i>4933427D06</i>    | ESTs                                                                                                                             | Chr7: 78.892287  | 6.043  | 45 | 10.5 | Chr8: 127.830308  | 0.053  |
| 208 | MA_M2M_0706_R | <a href="#">1429278_at</a>   | <i>2410170E07Rik</i> | RIKEN cDNA 2410170E07 gene                                                                                                       | Chr7: 140.992613 | 10.465 | 45 | 8.2  | Chr5: 130.3       | 0.097  |

|          |                   |                                        |                |                                                                                                                                                             |                          |                |    |      |                              |                |
|----------|-------------------|----------------------------------------|----------------|-------------------------------------------------------------------------------------------------------------------------------------------------------------|--------------------------|----------------|----|------|------------------------------|----------------|
|          |                   |                                        |                |                                                                                                                                                             |                          |                |    |      | 4052<br>2                    |                |
| 209<br>☐ | MA_M2M<br>_0706_R | <a href="#">14371<br/>51_at</a>        | <i>Usp22</i>   | ubiquitin specific<br>protease 22                                                                                                                           | Chr11:<br>61.15215<br>5  | 10.<br>09<br>3 | 45 | 16.3 | Chr19:<br>28.40<br>3278      | -<br>0.1<br>26 |
| 210<br>☐ | MA_M2M<br>_0706_R | <a href="#">14427<br/>66_at</a>        | <i>Ppp4r1</i>  | ESTs                                                                                                                                                        | Chr17:<br>65.81985<br>9  | 7.9<br>00      | 45 | 7.7  | Chr8:<br>123.2<br>8992<br>5  | -<br>0.0<br>78 |
| 211<br>☐ | MA_M2M<br>_0706_R | <a href="#">14229<br/>19_at</a>        | <i>Hrasls</i>  | HRAS-like<br>suppressor                                                                                                                                     | Chr16:<br>29.21767<br>4  | 6.3<br>15      | 45 | 8.7  | ChrX:<br>57.76<br>8447       | 0.0<br>54      |
| 212<br>☐ | MA_M2M<br>_0706_R | <a href="#">14587<br/>61_at</a>        | <i>Itpa</i>    | inosine<br>triphosphatase<br>(nucleoside<br>triphosphate<br>pyrophosphatase)                                                                                | Chr2:<br>130.6651<br>63  | 5.7<br>32      | 45 | 15.8 | Chr15:<br>12.68<br>7693      | -<br>0.0<br>43 |
| 213<br>☐ | MA_M2M<br>_0706_R | <a href="#">14390<br/>16_x_<br/>at</a> | <i>Sprr2a</i>  | small proline-rich<br>protein 2A                                                                                                                            | Chr3:<br>92.21921<br>7   | 10.<br>34<br>3 | 45 | 21.3 | Chr4:<br>33.74<br>8049       | -<br>0.2<br>55 |
| 214<br>☐ | MA_M2M<br>_0706_R | <a href="#">14510<br/>05_at</a>        | <i>Sumo1</i>   | small ubiquitin-like<br>modifier 1 (SMT3<br>suppressor of mif<br>two 3 homolog 1);<br>proximal and mid 3'<br>UTR                                            | Chr1:<br>59.63973<br>4   | 12.<br>00<br>0 | 45 | 11.6 | Chr5:<br>127.6<br>1713<br>3  | 0.1<br>12      |
| 215<br>☐ | MA_M2M<br>_0706_R | <a href="#">14522<br/>37_at</a>        | <i>Hrb</i>     | HIV-1 Rev binding<br>protein; mid-distal<br>3' UTR                                                                                                          | Chr1:<br>82.89581<br>1   | 7.7<br>92      | 45 | 11.6 | Chr18:<br>80.00<br>0000      | 0.2<br>06      |
| 216<br>☐ | MA_M2M<br>_0706_R | <a href="#">14435<br/>44_at</a>        | <i>C18orf1</i> | transmembrane<br>neocortically<br>enriched protein<br>with low density<br>lipoprotein receptor<br>domain, human<br>chromosome 18<br>open reading frame<br>1 | Chr18:<br>67.97776<br>3  | 7.0<br>44      | 45 | 14.7 | Chr1:<br>91.10<br>0378       | -<br>0.0<br>99 |
| 217<br>☐ | MA_M2M<br>_0706_R | <a href="#">14438<br/>70_at</a>        | <i>Abcc4</i>   | ATP-binding<br>cassette, sub-family<br>C (CFTR/MRP),<br>member 4; distal 3'<br>UTR                                                                          | Chr14:<br>118.4827<br>29 | 8.6<br>98      | 45 | 11.2 | Chr13:<br>50.00<br>0000      | 0.2<br>18      |
| 218<br>☐ | MA_M2M<br>_0706_R | <a href="#">14494<br/>38_at</a>        | <i>Dpm1</i>    | dolichol-phosphate<br>(beta-D)<br>mannosyltransferase<br>1                                                                                                  | Chr2:<br>168.2114<br>18  | 11.<br>49<br>6 | 45 | 11.1 | Chr12:<br>107.5<br>4795<br>1 | 0.1<br>12      |
| 219<br>☐ | MA_M2M<br>_0706_R | <a href="#">14202<br/>02_at</a>        | <i>S100a3</i>  | Mus musculus<br>transcribed<br>sequence                                                                                                                     | --                       | 5.5<br>77      | 45 | 12.5 | Chr19:<br>:                  | -<br>0.0<br>43 |



|          |                   |                            |                      |                                                                                              |                         |                |    |      |                              |                |
|----------|-------------------|----------------------------|----------------------|----------------------------------------------------------------------------------------------|-------------------------|----------------|----|------|------------------------------|----------------|
|          |                   |                            |                      |                                                                                              |                         |                |    |      | 27.53<br>1578                |                |
| 220<br>☐ | MA_M2M<br>_0706_R | <a href="#">1428213_at</a> | <i>2410003A14Rik</i> | RIKEN cDNA<br>2410003A14 gene                                                                | Chr7:<br>130.5335<br>76 | 11.<br>43<br>6 | 45 | 15.4 | Chr4:<br>88.04<br>5738       | 0.1<br>14      |
| 221<br>☐ | MA_M2M<br>_0706_R | <a href="#">1417025_at</a> | <i>H2-Eb1</i>        | histocompatibility 2,<br>class II antigen E<br>beta                                          | Chr17:<br>34.31435<br>7 | 10.<br>96<br>2 | 45 | 14.4 | Chr8:<br>123.2<br>8992<br>5  | -<br>0.2<br>79 |
| 222<br>☐ | MA_M2M<br>_0706_R | <a href="#">1451840_at</a> | <i>Kcnp4</i>         | Kv channel<br>interacting protein 4<br>(A-type potassium<br>channel modulatory<br>protein 4) | Chr5:<br>48.39013<br>5  | 5.8<br>91      | 45 | 9.1  | Chr11:<br>100.4<br>1203<br>1 | 0.0<br>31      |
| 223<br>☐ | MA_M2M<br>_0706_R | <a href="#">1430617_at</a> | <i>5730547N13Rik</i> | RIKEN cDNA<br>5730547N13 gene                                                                | Chr2:<br>119.6098<br>57 | 6.4<br>28      | 45 | 8.3  | Chr9:<br>103.6<br>2546<br>7  | 0.0<br>34      |
| 224<br>☐ | MA_M2M<br>_0706_R | <a href="#">1452135_at</a> | <i>Gpx6</i>          | glutathione<br>peroxidase 6                                                                  | Chr13:<br>21.31901<br>1 | 10.<br>09<br>6 | 45 | 14.7 | Chr3:<br>25.04<br>1091       | -<br>0.2<br>20 |
| 225<br>☐ | MA_M2M<br>_0706_R | <a href="#">1433622_at</a> | <i>Gemin4</i>        | gem (nuclear<br>organelle)<br>associated protein 4                                           | Chr11:<br>76.21087<br>8 | 7.8<br>66      | 45 | 10.1 | Chr7:<br>3.078<br>244        | -<br>0.0<br>97 |
| 226<br>☐ | MA_M2M<br>_0706_R | <a href="#">1430490_at</a> | <i>Tcfap2a</i>       | transcription factor<br>AP-2, alpha;<br>antisense in 5' UTR<br>(from AK017409)               | Chr13:<br>40.73460<br>9 | 6.1<br>73      | 45 | 8.8  | Chr4:<br>88.80<br>7538       | 0.0<br>45      |
| 227<br>☐ | MA_M2M<br>_0706_R | <a href="#">1448860_at</a> | <i>Rem2</i>          | rad and gem related<br>GTP binding protein<br>2; 3' UTR                                      | Chr14:<br>54.47991<br>2 | 8.1<br>98      | 45 | 9.6  | Chr16:<br>10.59<br>5499      | 0.0<br>99      |
| 228<br>☐ | MA_M2M<br>_0706_R | <a href="#">1442897_at</a> | <i>2610024E20Rik</i> | RIKEN cDNA<br>2610024E20 gene                                                                | Chr18:<br>34.49572<br>5 | 7.4<br>84      | 45 | 13.5 | Chr19:<br>32.73<br>8270      | 0.1<br>09      |
| 229<br>☐ | MA_M2M<br>_0706_R | <a href="#">1443042_at</a> | <i>D130047N11Rik</i> | RIKEN cDNA<br>D130047N11 gene                                                                | Chr16:<br>72.81761<br>9 | 6.7<br>95      | 45 | 11.7 | Chr9:<br>95.32<br>9897       | -<br>0.0<br>66 |
| 230<br>☐ | MA_M2M<br>_0706_R | <a href="#">1432866_at</a> | <i>Rbbp5</i>         | retinoblastoma<br>binding protein 5                                                          | Chr1:<br>132.4764<br>81 | 6.1<br>12      | 45 | 9.5  | Chr12:<br>107.5<br>4795<br>1 | 0.0<br>49      |
| 231<br>☐ | MA_M2M<br>_0706_R | <a href="#">1423767_at</a> | <i>Aip1</i>          | A interacting protein<br>1; last three exons<br>and proximal 3' UTR                          | Chr17:<br>74.29961<br>1 | 10.<br>83<br>8 | 45 | 11.3 | Chr9:<br>107.6<br>3925<br>0  | 0.1<br>10      |
| 232<br>☐ | MA_M2M<br>_0706_R | <a href="#">1417935_at</a> | <i>Mkrn2</i>         | makorin, ring finger<br>protein, 2                                                           | Chr6:<br>115.6180<br>89 | 9.4<br>96      | 45 | 9.9  | Chr5:<br>117.7<br>8965<br>0  | -<br>0.1<br>19 |

|                                 |               |                            |                      |                                                                                                                  |                   |        |    |      |                   |        |
|---------------------------------|---------------|----------------------------|----------------------|------------------------------------------------------------------------------------------------------------------|-------------------|--------|----|------|-------------------|--------|
| 233<br><input type="checkbox"/> | MA_M2M_0706_R | <a href="#">1435637_at</a> | <i>Itfg1</i>         | integrin alpha FG-GAP repeat containing 1 (T-cell immunomodulatory protein); distal 3' UTR                       | Chr8: 85.718072   | 9.959  | 45 | 11.7 | Chr15: 25.732086  | -0.248 |
| 234<br><input type="checkbox"/> | MA_M2M_0706_R | <a href="#">1416845_at</a> | <i>Tmem132a</i>      | transmembrane protein 132A (heat shock protein 5 binding protein 1, GRP78-binding protein); last exon and 3' UTR | Chr19: 10.857981  | 9.248  | 45 | 9.4  | Chr3: 27.192039   | 0.089  |
| 235<br><input type="checkbox"/> | MA_M2M_0706_R | <a href="#">1444048_at</a> | <i>AI666576</i>      | ESTs                                                                                                             | Chr9: 22.440388   | 7.059  | 45 | 12.6 | Chr13: 110.449360 | -0.064 |
| 236<br><input type="checkbox"/> | MA_M2M_0706_R | <a href="#">1434665_at</a> | <i>Aga</i>           | aspartylglucosaminidase; exons 6, 7, and 8                                                                       | Chr8: 53.521136   | 10.866 | 45 | 10.4 | Chr5: 130.340522  | 0.154  |
| 237<br><input type="checkbox"/> | MA_M2M_0706_R | <a href="#">1458209_at</a> | <i>2410012C07Rik</i> | RIKEN cDNA 2410012C07 gene                                                                                       | Chr7: 139.938644  | 6.871  | 45 | 13.4 | Chr8: 69.741264   | -0.063 |
| 238<br><input type="checkbox"/> | MA_M2M_0706_R | <a href="#">1459554_at</a> | <i>Otoa</i>          | ESTs, Weakly similar to L1 repeat, Tf subfamily, member 30 [] [M.musculus]                                       | Chr11: 41.313788  | 5.784  | 45 | 10.8 | Chr13: 105.184837 | 0.042  |
| 239<br><input type="checkbox"/> | MA_M2M_0706_R | <a href="#">1421174_at</a> | <i>Irf4</i>          | interferon regulatory factor 4 (pigmentation)                                                                    | Chr13: 30.761404  | 6.694  | 45 | 11.1 | Chr17: 6.039016   | 0.037  |
| 240<br><input type="checkbox"/> | MA_M2M_0706_R | <a href="#">1440006_at</a> | <i>BC026600</i>      | highly expressed non-coding pituitary and retinal gene BC026600; distal 3' end                                   | Chr17: 24.456563  | 6.108  | 45 | 19.9 | Chr17: 27.061005  | 0.068  |
| 241<br><input type="checkbox"/> | MA_M2M_0706_R | <a href="#">1426290_at</a> | <i>1500031M22Rik</i> | RIKEN cDNA 1500031M22 gene                                                                                       | Chr13: 106.952343 | 7.086  | 45 | 11.0 | Chr9: 105.774381  | 0.058  |
| 242<br><input type="checkbox"/> | MA_M2M_0706_R | <a href="#">1428334_at</a> | <i>Ostm1</i>         | osteopetrosis associated transmembrane protein 1; distal 3'UTR                                                   | Chr10: 42.701869  | 10.087 | 45 | 15.7 | Chr19: 8.707699   | 0.170  |
| 243<br><input type="checkbox"/> | MA_M2M_0706_R | <a href="#">1428812_at</a> | <i>1700040L02Rik</i> | RIKEN cDNA 1700040L02 gene                                                                                       | Chr10: 68.431234  | 7.569  | 45 | 12.7 | Chr13: 101.209232 | 0.151  |

|                                 |               |                              |                      |                                                                                                                      |                  |       |    |      |                   |        |
|---------------------------------|---------------|------------------------------|----------------------|----------------------------------------------------------------------------------------------------------------------|------------------|-------|----|------|-------------------|--------|
| 244<br><input type="checkbox"/> | MA_M2M_0706_R | <a href="#">1421595_at</a>   | <i>AB041544</i>      | hypothetical protein, MNCb-2622; putative 3' UTR (from EST AB041544)                                                 | Chr17: 83.574143 | 6.111 | 45 | 10.4 | Chr8: 117.545014  | 0.036  |
| 245<br><input type="checkbox"/> | MA_M2M_0706_R | <a href="#">1430796_at</a>   | <i>Trim14</i>        | tripartite motif-containing 14                                                                                       | Chr4: 46.509689  | 5.999 | 45 | 10.5 | Chr5: 133.062783  | 0.032  |
| 246<br><input type="checkbox"/> | MA_M2M_0706_R | <a href="#">1447224_at</a>   | <i>Edg5</i>          | endothelial differentiation, sphingolipid G-protein-coupled receptor 5; putative far 3' UTR (possible neighbor gene) | Chr9: 20.962394  | 6.096 | 45 | 10.5 | Chr15: 101.561023 | 0.040  |
| 247<br><input type="checkbox"/> | MA_M2M_0706_R | <a href="#">1441784_at</a>   | <i>Sox14</i>         | ESTs                                                                                                                 | Chr18: 66.319272 | 5.971 | 45 | 8.6  | Chr11: 99.734855  | -0.040 |
| 248<br><input type="checkbox"/> | MA_M2M_0706_R | <a href="#">1429750_at</a>   | <i>Minpp1</i>        | multiple inositol polyphosphate histidine phosphatase 1                                                              | Chr19: 32.487637 | 6.243 | 45 | 13.7 | Chr16: 26.422169  | 0.073  |
| 249<br><input type="checkbox"/> | MA_M2M_0706_R | <a href="#">1417492_at</a>   | <i>Ctsb</i>          | cathepsin B (amyloid precursor protein alpha secretase); mid 3' UTR                                                  | Chr14: 63.144180 | 9.001 | 45 | 12.1 | Chr4: 75.840751   | 0.242  |
| 250<br><input type="checkbox"/> | MA_M2M_0706_R | <a href="#">1455980_a_at</a> | <i>8430435B07Rik</i> | ESTs, Weakly similar to GAS2_MOUSE Growth-arrest-specific protein 2 (GAS-2) [M.musculus]                             | Chr10: 89.412598 | 5.951 | 45 | 11.4 | Chr18: 82.255306  | 0.048  |
| 251<br><input type="checkbox"/> | MA_M2M_0706_R | <a href="#">1442362_at</a>   | <i>Gm104</i>         | predicted gene 104 downstream of Exo1; possible 3' UTR extension of Exo1                                             | Chr1: 175.921524 | 6.516 | 45 | 13.0 | Chr5: 127.781724  | 0.058  |
| 252<br><input type="checkbox"/> | MA_M2M_0706_R | <a href="#">1453419_at</a>   | <i>Mras</i>          | muscle and microspikes RAS; far 3' UTR                                                                               | Chr9: 99.385470  | 9.174 | 45 | 7.6  | Chr15: 22.860400  | 0.087  |
| 253<br><input type="checkbox"/> | MA_M2M_0706_R | <a href="#">1425184_at</a>   | <i>2810433K01Rik</i> | RIKEN cDNA 2810433K01 gene                                                                                           | Chr18: 74.195320 | 6.437 | 45 | 14.9 | Chr14: 81.073940  | 0.052  |
| 254<br><input type="checkbox"/> | MA_M2M_0706_R | <a href="#">1438213_at</a>   | <i>A830018L16Rik</i> | RIKEN cDNA A830018L16 gene                                                                                           | Chr1: 11.598186  | 6.194 | 45 | 13.5 | Chr13: 108.957958 | 0.051  |

|                                 |               |                              |                      |                                                                                                   |                   |        |    |      |                   |        |
|---------------------------------|---------------|------------------------------|----------------------|---------------------------------------------------------------------------------------------------|-------------------|--------|----|------|-------------------|--------|
| 255<br><input type="checkbox"/> | MA_M2M_0706_R | <a href="#">1429390_at</a>   | <i>Acpl2</i>         | acid phosphatase-like 2                                                                           | Chr9: 96.823644   | 7.330  | 45 | 9.1  | Chr18: 78.806816  | 0.124  |
| 256<br><input type="checkbox"/> | MA_M2M_0706_R | <a href="#">1422391_at</a>   | <i>V1rc3</i>         | vomeranosal 1 receptor, C3                                                                        | Chr6: 57.137715   | 5.543  | 45 | 7.1  | Chr16: 97.718129  | -0.026 |
| 257<br><input type="checkbox"/> | MA_M2M_0706_R | <a href="#">1416901_at</a>   | <i>Npc2</i>          | Niemann Pick type C2; proximal 3' UTR                                                             | Chr12: 84.756822  | 12.119 | 45 | 11.1 | ChrX: 114.159505  | 0.083  |
| 258<br><input type="checkbox"/> | MA_M2M_0706_R | <a href="#">1446929_at</a>   | <i>Bach2</i>         | BTB and CNC homology, basic leucine zipper transcription factor 2; intron                         | Chr4: 32.246045   | 6.747  | 45 | 15.2 | Chr5: 131.541036  | -0.061 |
| 259<br><input type="checkbox"/> | MA_M2M_0706_R | <a href="#">1446558_at</a>   | <i>F730015K02Rik</i> | RIKEN cDNA F730015K02 gene                                                                        | Chr9: 64.840586   | 5.732  | 45 | 12.5 | Chr9: 99.750326   | 0.032  |
| 260<br><input type="checkbox"/> | MA_M2M_0706_R | <a href="#">1428415_at</a>   | <i>2310020H19Rik</i> | RIKEN cDNA 2310020H19 gene                                                                        | Chr12: 84.418169  | 7.386  | 45 | 8.5  | Chr9: 21.613311   | -0.103 |
| 261<br><input type="checkbox"/> | MA_M2M_0706_R | <a href="#">1450561_a_at</a> | <i>Surf1</i>         | surfeit gene 1; last four exons (one alternative exon excluded)                                   | Chr2: 26.913441   | 11.000 | 45 | 8.7  | Chr13: 111.021029 | 0.071  |
| 262<br><input type="checkbox"/> | MA_M2M_0706_R | <a href="#">1445038_at</a>   | <i>C730043O17</i>    | hypothetical protein C730043O17                                                                   | Chr18: 35.876721  | 7.222  | 45 | 13.9 | ChrX: 9.334336    | -0.047 |
| 263<br><input type="checkbox"/> | MA_M2M_0706_R | <a href="#">1426291_at</a>   | <i>Dimt1</i>         | DIM1 dimethyladenosine transferase 1-like; mid to distal 3' UTR                                   | Chr13: 106.959073 | 6.754  | 45 | 9.5  | ChrX: 3.231738    | 0.054  |
| 264<br><input type="checkbox"/> | MA_M2M_0706_R | <a href="#">1446111_at</a>   | <i>D14Ert611e</i>    | DNA segment, Chr 14, ERATO Doi 611, expressed                                                     | Chr14: 93.948174  | 5.980  | 45 | 12.5 | Chr5: 118.917989  | -0.042 |
| 265<br><input type="checkbox"/> | MA_M2M_0706_R | <a href="#">1415741_at</a>   | <i>Tmem165</i>       | transmembrane protein 165; 3' UTR                                                                 | Chr5: 76.208683   | 11.195 | 45 | 7.9  | Chr5: 45.290189   | 0.128  |
| 266<br><input type="checkbox"/> | MA_M2M_0706_R | <a href="#">1418146_a_at</a> | <i>Rbl2</i>          | retinoblastoma-like 2; proximal and mid 3' UTR                                                    | Chr8: 91.122460   | 9.162  | 45 | 13.4 | Chr18: 76.826488  | 0.191  |
| 267<br><input type="checkbox"/> | MA_M2M_0706_R | <a href="#">1417344_at</a>   | <i>C15orf24</i>      | putative ATG/GTP binding protein (hyperthrophic cardiomyopathy candidate gene); last three exons, | Chr2: 112.462915  | 13.144 | 45 | 12.3 | Chr12: 48.965551  | -0.086 |

|          |               |                              |                      |                                                                                 |                   |        |    |      |                  |        |
|----------|---------------|------------------------------|----------------------|---------------------------------------------------------------------------------|-------------------|--------|----|------|------------------|--------|
|          |               |                              |                      | proximal and mid 3' UTR                                                         |                   |        |    |      |                  |        |
| 268<br>☐ | MA_M2M_0706_R | <a href="#">1431841_at</a>   | <i>4930434E21Rik</i> | RIKEN cDNA 4930434E21 gene                                                      | Chr5: 149.599205  | 7.581  | 45 | 10.0 | Chr4: 156.100964 | -0.086 |
| 269<br>☐ | MA_M2M_0706_R | <a href="#">1417366_s_at</a> | <i>Calm1</i>         | calmodulin 1; 5' half of exon 3                                                 | Chr12: 100.203574 | 12.116 | 45 | 12.0 | Chr4: 75.840751  | -0.180 |
| 270<br>☐ | MA_M2M_0706_R | <a href="#">1418536_at</a>   | <i>H2-Q7</i>         | H-2 class I histocompatibility antigen, Q7 alpha Q7 to Q5                       | Chr17: 35.398424  | 8.385  | 45 | 51.3 | Chr17: 33.146326 | -0.631 |
| 271<br>☐ | MA_M2M_0706_R | <a href="#">1457806_at</a>   | <i>Dock1</i>         | dedicator of cytokinesis 1; intron of Dock1 (and antisense in C10orf141 3' UTR) | Chr7: 134.883034  | 7.218  | 45 | 13.1 | Chr9: 94.905865  | -0.079 |
| 272<br>☐ | MA_M2M_0706_R | <a href="#">1443846_x_at</a> | <i>Pank2</i>         | pantothenate kinase 2 (Hallervorden-Spatz syndrome)                             | Chr2: 131.283272  | 7.941  | 45 | 8.3  | Chr4: 88.045738  | -0.102 |
| 273<br>☐ | MA_M2M_0706_R | <a href="#">1458240_at</a>   | <i>Baiap1</i>        | brain-specific angiogenesis inhibitor 3                                         | Chr6: 93.705640   | 5.992  | 45 | 10.2 | ChrX: 146.829353 | 0.047  |
| 274<br>☐ | MA_M2M_0706_R | <a href="#">1455013_at</a>   | <i>Arih2</i>         | ariadne RBR E3 ubiquitin protein ligase 2                                       | Chr9: 108.603136  | 9.527  | 45 | 14.8 | Chr9: 107.831131 | 0.121  |
| 275<br>☐ | MA_M2M_0706_R | <a href="#">1419930_at</a>   | <i>D15Ert55e</i>     | DNA segment, Chr 15, ERATO Doi 55, expressed                                    | Chr15: 88.711127  | 5.794  | 45 | 13.9 | Chr17: 26.814001 | 0.033  |
| 276<br>☐ | MA_M2M_0706_R | <a href="#">1425868_at</a>   | <i>Hist2h2bb</i>     | histone cluster 2, H2bb; far 3' UTR (long form)                                 | Chr3: 96.278524   | 6.564  | 45 | 13.8 | Chr18: 78.806816 | 0.058  |
| 277<br>☐ | MA_M2M_0706_R | <a href="#">1424652_at</a>   | <i>Fam176a</i>       | family with sequence similarity 176, member A; mid 3' UTR                       | Chr6: 82.092516   | 10.637 | 45 | 13.8 | Chr5: 69.357018  | 0.145  |
| 278<br>☐ | MA_M2M_0706_R | <a href="#">1457084_at</a>   | <i>Nalp9c</i>        | NACHT, LRR and PYD containing protein 9c; last 3 exons                          | Chr7: 20.048808   | 7.457  | 45 | 9.6  | Chr7: 24.937915  | 0.057  |
| 279<br>☐ | MA_M2M_0706_R | <a href="#">1418658_at</a>   | <i>Rmdn1</i>         | regulator of microtubule dynamics 1; exons 4, 6, 7, 8, 9                        | Chr4: 19.588611   | 9.604  | 45 | 10.1 | Chr1: 189.222535 | -0.141 |
| 280<br>☐ | MA_M2M_0706_R | <a href="#">1416963_at</a>   | <i>Ubadc1</i>        | ubiquitin associated domain containing 1                                        | Chr2: 25.998617   | 10.703 | 45 | 16.0 | Chr12:           | 0.138  |

|                                 |                   |                              |                      |                                                                    |                     |            |    |      |                      |            |
|---------------------------------|-------------------|------------------------------|----------------------|--------------------------------------------------------------------|---------------------|------------|----|------|----------------------|------------|
|                                 |                   |                              |                      |                                                                    |                     |            |    |      | 86.10<br>5698        |            |
| 281<br><input type="checkbox"/> | MA_M2M<br>_0706_R | <a href="#">1436038_a_at</a> | <i>Dscr5</i>         | Down syndrome critical region homolog 5 (human)                    | Chr16:<br>94.364735 | 11.77<br>7 | 45 | 14.2 | Chr12:<br>107.923472 | 0.128      |
| 282<br><input type="checkbox"/> | MA_M2M<br>_0706_R | <a href="#">1451440_at</a>   | <i>Chodl</i>         | chondrolectin                                                      | Chr16:<br>78.951211 | 6.772      | 45 | 10.1 | Chr9:<br>29.939029   | 0.083      |
| 283<br><input type="checkbox"/> | MA_M2M<br>_0706_R | <a href="#">1452191_at</a>   | <i>Prcp</i>          | prolylcarboxypeptidase (angiotensinase C); last three coding exons | Chr7:<br>92.927708  | 9.720      | 45 | 18.9 | Chr3:<br>27.192039   | -<br>0.260 |
| 284<br><input type="checkbox"/> | MA_M2M<br>_0706_R | <a href="#">1431297_a_at</a> | <i>Crnde</i>         | colorectal neoplasia differentially expressed (non-protein coding) | Chr8:<br>92.326387  | 6.501      | 45 | 18.7 | Chr18:<br>78.806816  | -<br>0.079 |
| 285<br><input type="checkbox"/> | MA_M2M<br>_0706_R | <a href="#">1419820_at</a>   | <i>Pkhd1</i>         | polycystic kidney and hepatic disease 1; 3' UTR                    | Chr1:<br>20.057834  | 10.952     | 45 | 9.3  | Chr16:<br>49.849657  | 0.177      |
| 286<br><input type="checkbox"/> | MA_M2M<br>_0706_R | <a href="#">1443962_at</a>   | <i>Tfdp2</i>         | transcription factor Dp 2                                          | Chr9:<br>96.310545  | 8.001      | 45 | 17.9 | Chr9:<br>103.625467  | 0.166      |
| 287<br><input type="checkbox"/> | MA_M2M<br>_0706_R | <a href="#">1416030_a_at</a> | <i>Mcm7</i>          | minichromosome maintenance deficient 7 (S. cerevisiae)             | Chr5:<br>138.165990 | 9.862      | 45 | 14.6 | Chr12:<br>9.742519   | 0.168      |
| 288<br><input type="checkbox"/> | MA_M2M<br>_0706_R | <a href="#">1434771_at</a>   | <i>0610011F06Rik</i> | RIKEN cDNA 0610011F06 gene                                         | Chr17:<br>25.876764 | 12.779     | 45 | 13.8 | Chr18:<br>15.638699  | -<br>0.117 |
| 289<br><input type="checkbox"/> | MA_M2M<br>_0706_R | <a href="#">1459724_at</a>   | <i>Zdhhc20</i>       | zinc finger, DHHC domain containing 20; far 3' UTR                 | Chr14:<br>57.831654 | 8.054      | 45 | 10.5 | Chr8:<br>127.830308  | -<br>0.085 |
| 290<br><input type="checkbox"/> | MA_M2M<br>_0706_R | <a href="#">1423527_at</a>   | <i>4921510H08Rik</i> | RIKEN cDNA 4921510H08 gene                                         | Chr10:<br>97.694208 | 5.788      | 45 | 11.1 | Chr19:<br>32.357503  | -<br>0.040 |
| 291<br><input type="checkbox"/> | MA_M2M<br>_0706_R | <a href="#">1423289_a_at</a> | <i>1810029B16Rik</i> | RIKEN cDNA 1810029B16 gene                                         | Chr8:<br>66.476500  | 6.918      | 45 | 14.0 | Chr18:<br>82.106750  | 0.084      |
| 292<br><input type="checkbox"/> | MA_M2M<br>_0706_R | <a href="#">1423643_at</a>   | <i>Ddx39</i>         | DEAD (Asp-Glu-Ala-Asp) box polypeptide 39                          | Chr8:<br>83.722458  | 9.361      | 45 | 13.2 | Chr15:<br>7.167980   | -<br>0.174 |

|                                 |               |                              |                |                                                                                                                                    |                   |        |    |      |                   |        |
|---------------------------------|---------------|------------------------------|----------------|------------------------------------------------------------------------------------------------------------------------------------|-------------------|--------|----|------|-------------------|--------|
| 293<br><input type="checkbox"/> | MA_M2M_0706_R | <a href="#">1452937_s_at</a> | <i>Ccdc28b</i> | coiled coil domain containing 28B; exon                                                                                            | Chr4: 129.620698  | 7.524  | 45 | 15.8 | Chr19: 35.573941  | -0.123 |
| 294<br><input type="checkbox"/> | MA_M2M_0706_R | <a href="#">1448703_at</a>   | <i>Lsm8</i>    | LSM8 homolog, U6 small nuclear RNA associated (S. cerevisiae)                                                                      | Chr6: 18.851648   | 8.949  | 45 | 11.8 | Chr19: 32.887053  | -0.169 |
| 295<br><input type="checkbox"/> | MA_M2M_0706_R | <a href="#">1422248_at</a>   | <i>Irs4</i>    | insulin receptor substrate 4                                                                                                       | ChrX: 141.721555  | 7.300  | 45 | 9.0  | Chr4: 86.450967   | -0.099 |
| 296<br><input type="checkbox"/> | MA_M2M_0706_R | <a href="#">1457782_at</a>   | <i>Tln1</i>    | talin 1; intron                                                                                                                    | Chr4: 43.552404   | 7.622  | 45 | 11.9 | Chr13: 110.449360 | -0.149 |
| 297<br><input type="checkbox"/> | MA_M2M_0706_R | <a href="#">1422775_at</a>   | <i>Blk</i>     | B lymphoid kinase (oncogene); last exon and proximal half of 3' UTR                                                                | Chr14: 63.373004  | 6.880  | 45 | 9.3  | Chr9: 98.579310   | -0.068 |
| 298<br><input type="checkbox"/> | MA_M2M_0706_R | <a href="#">1433782_at</a>   | <i>Cldn12</i>  | claudin 12; distal 3' UTR                                                                                                          | Chr5: 5.505276    | 10.494 | 45 | 10.5 | Chr16: 38.378085  | -0.124 |
| 299<br><input type="checkbox"/> | MA_M2M_0706_R | <a href="#">1458499_at</a>   | <i>Pde10a</i>  | phosphodiesterase 10A; half distal 3' UTR                                                                                          | Chr17: 8.985059   | 6.988  | 45 | 12.8 | Chr2: 169.897347  | 0.060  |
| 300<br><input type="checkbox"/> | MA_M2M_0706_R | <a href="#">1460331_at</a>   | <i>Tm9sf2</i>  | transmembrane 9 superfamily member 2 (putative endosomal transporter or channel, transferrin receptor associated); last five exons | Chr14: 122.150782 | 12.980 | 45 | 10.7 | Chr19: 25.666449  | -0.137 |
| 301<br><input type="checkbox"/> | MA_M2M_0706_R | <a href="#">1450154_at</a>   | <i>Folh1</i>   | folate hydrolase (glutamate carboxypeptidase 2); last three exons and proximal 3' UTR                                              | Chr7: 86.719611   | 10.133 | 45 | 17.4 | Chr7: 85.068913   | 0.415  |
| 302<br><input type="checkbox"/> | MA_M2M_0706_R | <a href="#">1450411_at</a>   | <i>Fam122a</i> | RIKEN cDNA 2900009I07 gene                                                                                                         | Chr19: 24.475866  | 5.781  | 45 | 10.4 | Chr9: 105.774381  | 0.049  |
| 303<br><input type="checkbox"/> | MA_M2M_0706_R | <a href="#">1452197_at</a>   | <i>Smc4</i>    | structural maintenance of chromosomes 4; last three exons and proximal 3' UTR                                                      | Chr3: 69.033935   | 8.797  | 45 | 9.1  | Chr9: 3.400000    | -0.119 |

|                                 |               |                              |                      |                                                                                           |                  |        |    |      |                    |        |
|---------------------------------|---------------|------------------------------|----------------------|-------------------------------------------------------------------------------------------|------------------|--------|----|------|--------------------|--------|
| 304<br><input type="checkbox"/> | MA_M2M_0706_R | <a href="#">1430325_at</a>   | <i>Ubr1</i>          | ubiquitin protein ligase E3 component n-recognin 1                                        | Chr2: 120.863294 | 7.022  | 45 | 7.3  | Chr19 : 28.403278  | 0.065  |
| 305<br><input type="checkbox"/> | MA_M2M_0706_R | <a href="#">1439762_x_at</a> | <i>Adra2c</i>        | adrenergic receptor, alpha 2c                                                             | Chr5: 35.281602  | 5.645  | 45 | 11.3 | Chr16 : 69.289612  | -0.035 |
| 306<br><input type="checkbox"/> | MA_M2M_0706_R | <a href="#">1447607_at</a>   | <i>Mif</i>           | macrophage migration inhibitory factor (proinflammatory)                                  | Chr10: 97.110884 | 8.739  | 45 | 7.9  | Chr15 : 10.000000  | 0.072  |
| 307<br><input type="checkbox"/> | MA_M2M_0706_R | <a href="#">1428845_at</a>   | <i>Bclaf1</i>        | BCL2-associated transcription factor 1; distal 3' UTR (transQTL on Chr 4 in BXD eye data) | Chr10: 20.341571 | 9.897  | 45 | 10.4 | Chr7: 73.746984    | 0.183  |
| 308<br><input type="checkbox"/> | MA_M2M_0706_R | <a href="#">1459012_at</a>   | <i>A730041O05Rik</i> | RIKEN cDNA A730041O05 gene                                                                | Chr4: 16.165078  | 5.675  | 45 | 8.2  | Chr5: 133.062783   | 0.032  |
| 309<br><input type="checkbox"/> | MA_M2M_0706_R | <a href="#">1451296_x_at</a> | <i>Pabpc4</i>        | poly A binding protein, cytoplasmic 4; last exon and 3' UTR                               | Chr4: 123.297871 | 9.987  | 45 | 12.6 | Chr17 : 21.686210  | 0.101  |
| 310<br><input type="checkbox"/> | MA_M2M_0706_R | <a href="#">1450287_at</a>   | <i>Npas3</i>         | neuronal PAS domain protein 3                                                             | Chr12: 54.069289 | 5.850  | 45 | 10.8 | Chr8: 86.388770    | 0.034  |
| 311<br><input type="checkbox"/> | MA_M2M_0706_R | <a href="#">1416787_at</a>   | <i>Acvr1</i>         | activin A receptor, type 1; antisense in introns                                          | Chr2: 58.479891  | 8.240  | 45 | 9.1  | Chr4: 88.554042    | -0.068 |
| 312<br><input type="checkbox"/> | MA_M2M_0706_R | <a href="#">1458415_at</a>   | <i>Clec2e</i>        | C-type lectin domain family 2, member e                                                   | Chr6: 146.783700 | 7.753  | 45 | 12.4 | Chr7: 46.356949    | 0.090  |
| 313<br><input type="checkbox"/> | MA_M2M_0706_R | <a href="#">1459849_x_at</a> | <i>5730538E15Rik</i> | RIKEN cDNA 5730538E15 gene                                                                | Chr1: 9.720454   | 5.431  | 45 | 12.5 | Chr5: 135.879195   | 0.028  |
| 314<br><input type="checkbox"/> | MA_M2M_0706_R | <a href="#">1416319_at</a>   | <i>Adk</i>           | adenosine kinase; proximal to mid 3' UTR                                                  | Chr14: 21.447972 | 12.030 | 45 | 13.5 | Chr15 : 102.320887 | 0.123  |
| 315<br><input type="checkbox"/> | MA_M2M_0706_R | <a href="#">1431323_at</a>   | <i>Ccr9</i>          | chemokine (C-C motif) receptor 9                                                          | Chr9: 123.695947 | 6.978  | 45 | 13.3 | Chr4: 149.906312   | -0.091 |
| 316<br><input type="checkbox"/> | MA_M2M_0706_R | <a href="#">1453125_at</a>   | <i>Sox11</i>         | SRY-box 11; mid 3' UTR                                                                    | Chr12: 27.337337 | 5.757  | 45 | 12.8 | Chr13 : 103.949936 | 0.043  |



|          |               |                              |                      |                                                                                |                   |        |    |      |                   |        |
|----------|---------------|------------------------------|----------------------|--------------------------------------------------------------------------------|-------------------|--------|----|------|-------------------|--------|
| 317<br>☐ | MA_M2M_0706_R | <a href="#">1436542_at</a>   | <i>Ptger1</i>        | prostaglandin E receptor 1 (subtype EP1)                                       | Chr8: 83.666864   | 9.830  | 45 | 15.1 | Chr8: 80.868085   | -0.144 |
| 318<br>☐ | MA_M2M_0706_R | <a href="#">1424157_at</a>   | <i>Ehd2</i>          | EH-domain containing 2; mid-distal 3' UTR                                      | Chr7: 15.949247   | 8.934  | 45 | 14.8 | Chr17: 21.690414  | -0.124 |
| 319<br>☐ | MA_M2M_0706_R | <a href="#">1416697_at</a>   | <i>Dpp4</i>          | dipeptidylpeptidase 4; mid 3' UTR                                              | Chr2: 62.331853   | 10.157 | 45 | 9.9  | Chr4: 88.045738   | 0.176  |
| 320<br>☐ | MA_M2M_0706_R | <a href="#">1428164_at</a>   | <i>Nudt9</i>         | nudix (nucleoside diphosphate linked moiety X)-type motif 9                    | Chr5: 104.061732  | 10.994 | 45 | 10.7 | Chr15: 25.732086  | -0.128 |
| 321<br>☐ | MA_M2M_0706_R | <a href="#">1427738_at</a>   | <i>D0Kist2</i>       | DNA segment, KIST 2                                                            | Chr7: 61.201731   | 5.790  | 45 | 8.2  | Chr9: 99.750326   | 0.029  |
| 322<br>☐ | MA_M2M_0706_R | <a href="#">1417594_at</a>   | <i>Gkap1</i>         | G kinase anchoring protein 1; last 5 exons and 3' UTR                          | Chr13: 58.233391  | 11.023 | 45 | 14.8 | Chr4: 62.707256   | 0.162  |
| 323<br>☐ | MA_M2M_0706_R | <a href="#">1424347_at</a>   | <i>Ppp6c</i>         | protein phosphatase 6, catalytic subunit                                       | Chr2: 39.194994   | 11.305 | 45 | 7.7  | Chr19: 49.483195  | -0.090 |
| 324<br>☐ | MA_M2M_0706_R | <a href="#">1431422_a_at</a> | <i>Dusp14</i>        | dual specificity phosphatase 14                                                | Chr11: 84.048492  | 9.171  | 45 | 15.4 | Chr3: 39.650830   | -0.176 |
| 325<br>☐ | MA_M2M_0706_R | <a href="#">1433722_at</a>   | <i>5730522G15Rik</i> | RIKEN cDNA 5730522G15 gene                                                     | Chr7: 75.754024   | 10.460 | 45 | 7.6  | Chr4: 40.731591   | 0.112  |
| 326<br>☐ | MA_M2M_0706_R | <a href="#">1439564_at</a>   | <i>1700090G07Rik</i> | RIKEN cDNA 1700090G07 gene                                                     | Chr17: 86.917537  | 8.555  | 45 | 7.5  | Chr9: 64.513351   | 0.093  |
| 327<br>☐ | MA_M2M_0706_R | <a href="#">1444040_at</a>   | <i>Lair1</i>         | leukocyte-associated Ig-like receptor 1                                        | Chr7: 4.007164    | 6.144  | 45 | 9.3  | Chr9: 29.940961   | -0.052 |
| 328<br>☐ | MA_M2M_0706_R | <a href="#">1433846_s_at</a> | <i>Fam175b</i>       | abraxas brother 1, family with sequence similarity 175 member B; distal 3' UTR | Chr7: 132.884531  | 10.297 | 45 | 10.0 | Chr10: 82.045440  | -0.093 |
| 329<br>☐ | MA_M2M_0706_R | <a href="#">1455516_at</a>   | <i>Csrnp3</i>        | cysteine/serine-rich nuclear protein 3; distal 3' UTR                          | Chr2: 66.030963   | 5.936  | 45 | 10.3 | Chr19: 32.738270  | -0.053 |
| 330<br>☐ | MA_M2M_0706_R | <a href="#">1452628_at</a>   | <i>Bag5</i>          | BCL2-associated athanogene 5; exon and 3'UTR                                   | Chr12: 111.709888 | 9.104  | 45 | 22.8 | Chr13: 110.449360 | 0.118  |

|                                 |               |                              |                              |                                                                                                  |                   |        |    |      |                   |        |
|---------------------------------|---------------|------------------------------|------------------------------|--------------------------------------------------------------------------------------------------|-------------------|--------|----|------|-------------------|--------|
| 331<br><input type="checkbox"/> | MA_M2M_0706_R | <a href="#">1459286_at</a>   | <i>1700009F06 Rik</i>        | RIKEN cDNA 1700009F06 gene                                                                       | Chr10: 9.695469   | 5.617  | 45 | 10.4 | Chr5: 130.340522  | 0.027  |
| 332<br><input type="checkbox"/> | MA_M2M_0706_R | <a href="#">1424607_a_at</a> | <i>LOC432823</i>             | endogenous retroviral sequence MGC37588; repetitive element                                      | ChrUn: 1.000000   | 11.045 | 45 | 11.9 | Chr3: 41.542098   | 0.269  |
| 333<br><input type="checkbox"/> | MA_M2M_0706_R | <a href="#">1430268_at</a>   | <i>Trpm3</i>                 | transient receptor potential cation channel, subfamily M, member 3                               | Chr19: 22.554677  | 6.888  | 45 | 11.1 | Chr13: 108.957958 | -0.071 |
| 334<br><input type="checkbox"/> | MA_M2M_0706_R | <a href="#">1442435_at</a>   | <i>AI317223</i>              | expressed sequence AI317223                                                                      | Chr11: 75.085192  | 8.790  | 45 | 11.0 | Chr7: 6.011490    | 0.161  |
| 335<br><input type="checkbox"/> | MA_M2M_0706_R | <a href="#">1445928_at</a>   | <i>March6</i>                | membrane-associated ring finger (C3HC4) 6                                                        | Chr15: 31.484864  | 7.947  | 45 | 9.1  | Chr5: 27.285288   | 0.089  |
| 336<br><input type="checkbox"/> | MA_M2M_0706_R | <a href="#">1457443_at</a>   | <i>Gpatc2</i>                | G patch domain containing 2                                                                      | Chr1: 187.239847  | 5.972  | 45 | 10.0 | Chr2: 79.343444   | 0.031  |
| 337<br><input type="checkbox"/> | MA_M2M_0706_R | <a href="#">1428979_at</a>   | <i>Mtf1</i>                  | metal response element binding transcription factor 1; putative far 3' UTR                       | Chr4: 124.848813  | 8.171  | 45 | 12.0 | Chr11: 21.343911  | -0.129 |
| 338<br><input type="checkbox"/> | MA_M2M_0706_R | <a href="#">1424940_s_at</a> | <i>BC022687</i>              | cDNA sequence BC022687                                                                           | Chr12: 112.815781 | 8.967  | 45 | 10.3 | Chr9: 110.638628  | 0.150  |
| 339<br><input type="checkbox"/> | MA_M2M_0706_R | <a href="#">1442218_at</a>   | <i>Map3k9</i>                | mitogen-activated protein kinase kinase 9 (melanoma-associated); mid distal 3' UTR               | Chr12: 81.717910  | 6.769  | 45 | 13.0 | Chr13: 110.449360 | 0.050  |
| 340<br><input type="checkbox"/> | MA_M2M_0706_R | <a href="#">1459546_s_at</a> | <i>Enpp1</i>                 | ectonucleotide pyrophosphatase/phosphodiesterase 1; last exon and proximal 3' UTR                | Chr10: 24.641520  | 8.278  | 45 | 15.5 | Chr4: 74.391573   | 0.108  |
| 341<br><input type="checkbox"/> | MA_M2M_0706_R | <a href="#">1424609_a_at</a> | <i>LTR_Affy_1424609_a_at</i> | polymorphic long terminal repeat; poor probe specificity                                         | Chr7: 111.565966  | 11.088 | 45 | 11.6 | Chr5: 27.285288   | 0.246  |
| 342<br><input type="checkbox"/> | MA_M2M_0706_R | <a href="#">1448060_at</a>   | <i>Sema6d</i>                | sema domain, transmembrane domain (TM), and cytoplasmic domain, (semaphorin) 6D; proximal 3' UTR | Chr2: 124.665441  | 7.076  | 45 | 8.5  | Chr6: 32.610603   | -0.061 |

|          |               |                            |                      |                                                                                                         |                  |        |    |      |                   |        |
|----------|---------------|----------------------------|----------------------|---------------------------------------------------------------------------------------------------------|------------------|--------|----|------|-------------------|--------|
| 343<br>☐ | MA_M2M_0706_R | <a href="#">1444903_at</a> | <i>March6</i>        | membrane-associated ring finger (C3HC4) 6                                                               | Chr15: 31.519471 | 6.944  | 45 | 8.7  | Chr13: 103.151983 | -0.100 |
| 344<br>☐ | MA_M2M_0706_R | <a href="#">1418929_at</a> | <i>Ift57</i>         | intraflagellar transport 57 (estrogen-related receptor beta like 1); 4 exons and 3'UTR                  | Chr16: 49.763742 | 9.360  | 45 | 13.2 | Chr9: 15.889229   | -0.092 |
| 345<br>☐ | MA_M2M_0706_R | <a href="#">1443791_at</a> | <i>4931406I20Rik</i> | RIKEN cDNA 4931406I20 gene                                                                              | Chr9: 53.401100  | 5.609  | 45 | 10.3 | Chr13: 103.151983 | 0.031  |
| 346<br>☐ | MA_M2M_0706_R | <a href="#">1455376_at</a> | <i>Kiaa0564</i>      | KIAA0564 putative ATP-binding protein; last exon and proximal 3' UTR (major BXD39 strain variant or KO) | Chr14: 79.201722 | 10.413 | 45 | 26.2 | Chr14: 78.383350  | 0.217  |
| 347<br>☐ | MA_M2M_0706_R | <a href="#">1450192_at</a> | <i>Lhcgr</i>         | luteinizing hormone/choriogona dotropin receptor                                                        | Chr17: 88.741574 | 5.952  | 45 | 10.4 | Chr4: 86.450967   | -0.033 |
| 348<br>☐ | MA_M2M_0706_R | <a href="#">1427774_at</a> | <i>Defb7</i>         | defensin beta 7                                                                                         | Chr8: 19.497557  | 5.578  | 45 | 14.3 | Chr15: 101.561023 | 0.037  |
| 349<br>☐ | MA_M2M_0706_R | <a href="#">1423460_at</a> | <i>Perq1</i>         | PERQ amino acid rich, with GYF domain 1                                                                 | Chr5: 137.525506 | 9.329  | 45 | 17.4 | Chr2: 159.542988  | -0.134 |
| 350<br>☐ | MA_M2M_0706_R | <a href="#">1430794_at</a> | <i>4933426K07Rik</i> | RIKEN cDNA 4933426K07 gene                                                                              | Chr11: 57.655491 | 7.035  | 45 | 10.6 | Chr16: 26.422169  | 0.070  |
| 351<br>☐ | MA_M2M_0706_R | <a href="#">1420112_at</a> | <i>Pacs1</i>         | phosphofurin acidic cluster sorting protein 1                                                           | Chr19: 5.263963  | 5.823  | 45 | 13.0 | Chr4: 81.958676   | 0.045  |
| 352<br>☐ | MA_M2M_0706_R | <a href="#">1446052_at</a> | <i>1700082M22Rik</i> | RIKEN cDNA 1700082M22 gene                                                                              | ChrX: 79.408693  | 6.768  | 45 | 12.9 | Chr1: 91.097803   | -0.068 |
| 353<br>☐ | MA_M2M_0706_R | <a href="#">1418294_at</a> | <i>Epb4.1/4b</i>     | erythrocyte protein band 4.1-like 4b                                                                    | Chr4: 57.061849  | 8.437  | 45 | 8.2  | Chr15: 25.698695  | -0.119 |
| 354<br>☐ | MA_M2M_0706_R | <a href="#">1452582_at</a> | <i>Galm</i>          | galactose mutarotase; mid 3' UTR                                                                        | Chr17: 80.184508 | 12.125 | 45 | 12.1 | ChrX: 114.159505  | 0.125  |

|          |                   |                              |                      |                                                                                                                                    |                     |        |    |      |                     |        |
|----------|-------------------|------------------------------|----------------------|------------------------------------------------------------------------------------------------------------------------------------|---------------------|--------|----|------|---------------------|--------|
| 355<br>☐ | MA_M2M<br>_0706_R | <a href="#">1418605_at</a>   | <i>Nr2c1</i>         | nuclear receptor subfamily 2, group C, member 1; last exon and 3' UTR                                                              | Chr10:<br>94.195174 | 6.877  | 45 | 9.4  | Chr18:<br>80.000000 | 0.080  |
| 356<br>☐ | MA_M2M<br>_0706_R | <a href="#">1454647_at</a>   | <i>Nphp3</i>         | nephronophthisis 3 (adolescent, nephronophthisis type 3, tapeto-retinal degeneration); mid 3' UTR (antisense in promoter of Ccrl1) | Chr9:<br>104.127062 | 13.266 | 45 | 12.4 | Chr5:<br>130.340522 | 0.143  |
| 357<br>☐ | MA_M2M<br>_0706_R | <a href="#">1450198_at</a>   | <i>Dusp13</i>        | dual specificity phosphatase 13; last three exons                                                                                  | Chr14:<br>21.733706 | 8.079  | 45 | 12.0 | Chr4:<br>81.958676  | -0.077 |
| 358<br>☐ | MA_M2M<br>_0706_R | <a href="#">1416029_at</a>   | <i>Tiegl</i>         | TGFB inducible early growth response 1; distal 3' UTR                                                                              | Chr15:<br>38.294544 | 7.459  | 45 | 9.6  | Chr19:<br>44.599198 | -0.172 |
| 359<br>☐ | MA_M2M<br>_0706_R | <a href="#">1444135_at</a>   | <i>6332401O19Rik</i> | RIKEN cDNA 6332401O19 gene                                                                                                         | Chr6:<br>24.952549  | 8.893  | 45 | 20.3 | Chr19:<br>25.441462 | 0.088  |
| 360<br>☐ | MA_M2M<br>_0706_R | <a href="#">1454423_at</a>   | <i>4930538D17Rik</i> | hypothetical protein FLJ22529; apparent unspliced intron                                                                           | Chr19:<br>46.367329 | 10.454 | 45 | 10.5 | Chr4:<br>88.045738  | -0.136 |
| 361<br>☐ | MA_M2M<br>_0706_R | <a href="#">1434132_at</a>   | <i>Spg8</i>          | spastic paraplegia 8 (strumpellin); last three exons and proximal 3' UTR                                                           | Chr15:<br>59.332020 | 11.907 | 45 | 9.3  | Chr4:<br>81.958676  | 0.086  |
| 362<br>☐ | MA_M2M<br>_0706_R | <a href="#">1423764_s_at</a> | <i>Mrpl37</i>        | mitochondrial ribosomal protein L37; last three exons                                                                              | Chr4:<br>107.057424 | 10.237 | 45 | 13.5 | Chr8:<br>123.289925 | 0.097  |
| 363<br>☐ | MA_M2M<br>_0706_R | <a href="#">1425336_x_at</a> | <i>H2-K1</i>         | histocompatibility 2, K1, K region (major histocompatibility complex, class I, C); last exon and 3' UTR                            | Chr17:<br>35.266843 | 13.512 | 45 | 18.0 | Chr2:<br>134.462008 | -0.321 |
| 364<br>☐ | MA_M2M<br>_0706_R | <a href="#">1422650_a_at</a> | <i>RioK3</i>         | RIO kinase 3 (yeast)                                                                                                               | Chr18:<br>12.152817 | 9.875  | 45 | 9.6  | Chr18:<br>82.106750 | 0.139  |
| 365<br>☐ | MA_M2M<br>_0706_R | <a href="#">1445251_at</a>   | <i>Tnfsf13b</i>      | tumor necrosis factor (ligand) superfamily, member 13b (B-lymphocyte stimulator, Delta BAFF); far distal 3' UTR                    | Chr8:<br>10.037253  | 6.684  | 45 | 16.9 | Chr8:<br>127.830308 | -0.081 |

|          |               |                            |                      |                                                                                                        |                  |                |    |      |                  |                |
|----------|---------------|----------------------------|----------------------|--------------------------------------------------------------------------------------------------------|------------------|----------------|----|------|------------------|----------------|
| 366<br>☐ | MA_M2M_0706_R | <a href="#">1421767_at</a> | <i>Adk</i>           | adenosine kinase; last two exons and proximal 3' UTR                                                   | Chr14: 21.423505 | 7.2<br>21      | 45 | 11.8 | ChrX: 164.048002 | 0.0<br>67      |
| 367<br>☐ | MA_M2M_0706_R | <a href="#">1443735_at</a> | <i>6720457D02Rik</i> | RIKEN cDNA 6720457D02 gene                                                                             | --               | 5.6<br>37      | 45 | 9.0  | Chr9: 103.625467 | 0.0<br>33      |
| 368<br>☐ | MA_M2M_0706_R | <a href="#">1420919_at</a> | <i>Sgk3</i>          | serum/glucocorticoid regulated kinase 3; distal 3' UTR                                                 | Chr1: 9.899981   | 9.9<br>25      | 45 | 11.7 | Chr9: 98.579310  | 0.1<br>10      |
| 369<br>☐ | MA_M2M_0706_R | <a href="#">1449167_at</a> | <i>Epb41l4a</i>      | erythrocyte protein band 4.1-like 4a                                                                   | Chr18: 33.797013 | 8.4<br>36      | 45 | 11.8 | Chr18: 76.870082 | 0.1<br>58      |
| 370<br>☐ | MA_M2M_0706_R | <a href="#">1426190_at</a> | <i>Aym1</i>          | activator of yeast meiotic promoters 1                                                                 | Chr5: 113.357415 | 8.5<br>53      | 45 | 10.2 | Chr18: 78.806816 | -<br>0.0<br>70 |
| 371<br>☐ | MA_M2M_0706_R | <a href="#">1437492_at</a> | <i>Mkx</i>           | mohawk; distal 3' UTR                                                                                  | Chr18: 6.935145  | 5.9<br>03      | 45 | 10.7 | Chr9: 85.995347  | 0.0<br>47      |
| 372<br>☐ | MA_M2M_0706_R | <a href="#">1448609_at</a> | <i>Tst</i>           | thiosulfate sulfurtransferase, mitochondrial; last 2 exons and 3' UTR                                  | Chr15: 78.399601 | 12.<br>30<br>3 | 45 | 12.0 | Chr5: 118.917989 | -<br>0.1<br>58 |
| 373<br>☐ | MA_M2M_0706_R | <a href="#">1452134_at</a> | <i>Tmem175</i>       | transmembrane protein 175; last exon and proximal 3' UTR                                               | Chr5: 108.646099 | 8.5<br>06      | 45 | 10.1 | Chr18: 78.806816 | 0.1<br>18      |
| 374<br>☐ | MA_M2M_0706_R | <a href="#">1426453_at</a> | <i>Pitrm1</i>        | pitrilysin metalloprotease 1                                                                           | Chr13: 6.578438  | 9.8<br>21      | 45 | 11.5 | Chr1: 133.168278 | -<br>0.1<br>26 |
| 375<br>☐ | MA_M2M_0706_R | <a href="#">1418859_at</a> | <i>Rfxap</i>         | regulatory factor X-associated protein                                                                 | Chr3: 54.804327  | 8.3<br>14      | 45 | 9.8  | Chr2: 131.056131 | 0.1<br>37      |
| 376<br>☐ | MA_M2M_0706_R | <a href="#">1428439_at</a> | <i>Nub1</i>          | Nedd8 ultimate buster 1                                                                                | Chr5: 24.710367  | 8.1<br>05      | 45 | 10.8 | Chr5: 25.115971  | -<br>0.0<br>90 |
| 377<br>☐ | MA_M2M_0706_R | <a href="#">1416181_at</a> | <i>Mesdc2</i>        | mesoderm development candidate 2 (paraventricular medial hypothalamic signature); mid or distal 3' UTR | Chr7: 83.898706  | 11.<br>34<br>5 | 45 | 9.3  | Chr7: 89.123287  | 0.1<br>14      |
| 378<br>☐ | MA_M2M_0706_R | <a href="#">1428461_at</a> | <i>Ppp2r5e</i>       | protein phosphatase 2, regulatory subunit B (B56), epsilon isoform                                     | Chr12: 75.452747 | 9.6<br>09      | 45 | 11.5 | Chr2: 99.825314  | -<br>0.1<br>44 |

|                                 |               |                            |                      |                                                                                                                                                 |                  |        |    |      |                   |        |
|---------------------------------|---------------|----------------------------|----------------------|-------------------------------------------------------------------------------------------------------------------------------------------------|------------------|--------|----|------|-------------------|--------|
| 379<br><input type="checkbox"/> | MA_M2M_0706_R | <a href="#">1424294_at</a> | <i>Ppp4r1</i>        | protein phosphatase 4, regulatory subunit 1                                                                                                     | Chr17: 65.841282 | 10.290 | 45 | 10.6 | Chr13: 108.957958 | 0.123  |
| 380<br><input type="checkbox"/> | MA_M2M_0706_R | <a href="#">1423662_at</a> | <i>Atp6ap2</i>       | ATPase, H+ transporting, lysosomal accessory protein 2; mid 3' UTR                                                                              | ChrX: 12.616164  | 13.176 | 45 | 9.9  | Chr2: 107.153805  | -0.122 |
| 381<br><input type="checkbox"/> | MA_M2M_0706_R | <a href="#">1459406_at</a> | <i>Cept1</i>         | choline/ethanolamin ephosphotransferase 1                                                                                                       | Chr3: 106.536090 | 6.296  | 45 | 9.4  | Chr2: 145.281646  | 0.048  |
| 382<br><input type="checkbox"/> | MA_M2M_0706_R | <a href="#">1425496_at</a> | <i>Abca3</i>         | ATP-binding cassette, sub-family A (ABC1), member 3 (lipid organization and formation of lamellar bodies); last three exons and proximal 3' UTR | Chr17: 24.408551 | 11.751 | 45 | 12.9 | Chr17: 31.632850  | 0.214  |
| 383<br><input type="checkbox"/> | MA_M2M_0706_R | <a href="#">1456947_at</a> | <i>Pafah1b1</i>      | platelet-activating factor acetylhydrolase, isoform 1b, beta 1 subunit (Miller-Dieker lissencephaly); intron 1 (EST AK039862)                   | Chr11: 27.567873 | 7.439  | 45 | 12.2 | Chr7: 89.123287   | -0.124 |
| 384<br><input type="checkbox"/> | MA_M2M_0706_R | <a href="#">1454342_at</a> | <i>C030007D22Rik</i> | RIKEN cDNA C030007D22 gene                                                                                                                      | Chr4: 110.435012 | 5.608  | 45 | 9.7  | Chr8: 11.279405   | -0.029 |
| 385<br><input type="checkbox"/> | MA_M2M_0706_R | <a href="#">1459271_at</a> | <i>Cetn2</i>         | centrin 2                                                                                                                                       | ChrX: 72.911975  | 6.607  | 45 | 11.9 | Chr18: 78.806816  | -0.063 |
| 386<br><input type="checkbox"/> | MA_M2M_0706_R | <a href="#">1423459_at</a> | <i>Cops2</i>         | COP9 (constitutive photomorphogenic) homolog, subunit 2; last exon and proximal 3' UTR                                                          | Chr2: 125.832025 | 10.402 | 45 | 23.6 | Chr5: 130.340522  | 0.205  |
| 387<br><input type="checkbox"/> | MA_M2M_0706_R | <a href="#">1457302_at</a> | <i>Slc20a2</i>       | solute carrier family 20, member 2; intron of Slc20a2, last exon of BC035532                                                                    | Chr8: 22.482842  | 7.279  | 45 | 12.0 | Chr8: 24.305481   | 0.125  |
| 388<br><input type="checkbox"/> | MA_M2M_0706_R | <a href="#">1444081_at</a> | <i>5033428A16Rik</i> | RIKEN cDNA 5033428A16 gene                                                                                                                      | Chr8: 88.127404  | 5.879  | 45 | 11.6 | Chr1: 91.097803   | 0.035  |

|                                 |               |                              |                      |                                                                                                                    |                   |        |    |      |                  |        |
|---------------------------------|---------------|------------------------------|----------------------|--------------------------------------------------------------------------------------------------------------------|-------------------|--------|----|------|------------------|--------|
| 389<br><input type="checkbox"/> | MA_M2M_0706_R | <a href="#">1442072_at</a>   | <i>1110049L02Rik</i> | RIKEN cDNA 1110049L02 gene                                                                                         | Chr9: 56.203799   | 6.309  | 45 | 11.7 | Chr16: 10.595499 | -0.055 |
| 390<br><input type="checkbox"/> | MA_M2M_0706_R | <a href="#">1415708_at</a>   | <i>Tug1</i>          | taurine upregulated gene 1; distal 3' UTR                                                                          | Chr11: 3.640063   | 10.813 | 45 | 10.3 | Chr2: 173.244458 | -0.121 |
| 391<br><input type="checkbox"/> | MA_M2M_0706_R | <a href="#">1449047_at</a>   | <i>1600020H07Rik</i> | RIKEN cDNA 1600020H07 gene                                                                                         | Chr14: 31.615360  | 9.381  | 45 | 16.7 | Chr7: 6.677334   | 0.378  |
| 392<br><input type="checkbox"/> | MA_M2M_0706_R | <a href="#">1428803_at</a>   | <i>Acot6</i>         | acyl-coenzyme A thioesterase 6                                                                                     | Chr12: 84.110781  | 7.725  | 45 | 9.7  | ChrX: 37.500000  | 0.103  |
| 393<br><input type="checkbox"/> | MA_M2M_0706_R | <a href="#">1429556_at</a>   | <i>Tead1</i>         | TEA domain family member 1 (SV40 transcriptional enhancer factor, Sveinsson's chorioretinal atrophy); distal 3'UTR | Chr7: 112.905932  | 10.670 | 45 | 11.0 | Chr15: 94.266750 | -0.156 |
| 394<br><input type="checkbox"/> | MA_M2M_0706_R | <a href="#">1430359_a_at</a> | <i>9130012B15Rik</i> | RIKEN cDNA 9130012B15 gene                                                                                         | Chr7: 143.797823  | 9.595  | 45 | 9.3  | Chr10: 27.031021 | -0.084 |
| 395<br><input type="checkbox"/> | MA_M2M_0706_R | <a href="#">1450777_at</a>   | <i>Xrn2</i>          | 5'-3' exoribonuclease 2; exons 22, 23, 24, and 25                                                                  | Chr2: 147.061459  | 8.907  | 45 | 17.0 | Chr15: 93.021696 | 0.137  |
| 396<br><input type="checkbox"/> | MA_M2M_0706_R | <a href="#">1449067_at</a>   | <i>Slc2a2</i>        | solute carrier family 2 (facilitated glucose transporter), member 2; distal 3' UTR                                 | Chr3: 28.727844   | 13.426 | 45 | 13.1 | Chr17: 21.686210 | 0.282  |
| 397<br><input type="checkbox"/> | MA_M2M_0706_R | <a href="#">1456130_at</a>   | <i>Pcdh7</i>         | protocadherin 7                                                                                                    | Chr6: 12.311625   | 6.255  | 45 | 14.4 | Chr15: 93.021696 | -0.103 |
| 398<br><input type="checkbox"/> | MA_M2M_0706_R | <a href="#">1460221_at</a>   | <i>Ptges3</i>        | prostaglandin E synthase 3 (cytosolic); mid-proximal 3' UTR                                                        | Chr10: 128.076319 | 12.499 | 45 | 11.2 | Chr15: 94.266750 | -0.201 |
| 399<br><input type="checkbox"/> | MA_M2M_0706_R | <a href="#">1418034_at</a>   | <i>Mrps9</i>         | mitochondrial ribosomal protein S9                                                                                 | Chr1: 42.903338   | 8.318  | 45 | 11.1 | Chr7: 24.937915  | -0.138 |
| 400<br><input type="checkbox"/> | MA_M2M_0706_R | <a href="#">1440037_at</a>   | <i>Pbx1</i>          | pre B-cell leukemia transcription factor 1; 3' UTR of short form message (intron 2)                                | Chr1: 168.424573  | 10.578 | 45 | 13.7 | Chr3: 27.192039  | 0.282  |

|                                 |               |                              |                      |                                                                                                                                    |                   |        |    |      |                  |        |
|---------------------------------|---------------|------------------------------|----------------------|------------------------------------------------------------------------------------------------------------------------------------|-------------------|--------|----|------|------------------|--------|
| 401<br><input type="checkbox"/> | MA_M2M_0706_R | <a href="#">1451742_a_at</a> | <i>Ugp2</i>          | UDP-glucose pyrophosphorylase 2                                                                                                    | Chr11: 21.323220  | 13.374 | 45 | 12.4 | Chr6: 34.483299  | 0.146  |
| 402<br><input type="checkbox"/> | MA_M2M_0706_R | <a href="#">1460165_at</a>   | <i>Ppp1ca</i>        | protein phosphatase 1, catalytic subunit, alpha isoform; last exon and proximal half of 3' UTR                                     | Chr19: 4.195010   | 13.664 | 45 | 10.0 | Chr2: 75.132893  | -0.103 |
| 403<br><input type="checkbox"/> | MA_M2M_0706_R | <a href="#">1460575_at</a>   | <i>D3Erttd194e</i>   | DNA segment, Chr 3, ERATO Doi 194, expressed                                                                                       | Chr3: 58.555538   | 8.811  | 45 | 12.5 | Chr15: 95.949674 | 0.123  |
| 404<br><input type="checkbox"/> | MA_M2M_0706_R | <a href="#">1423080_at</a>   | <i>Tomm20</i>        | translocase of outer mitochondrial membrane 20                                                                                     | Chr8: 20.392462   | 13.652 | 45 | 14.3 | Chr2: 78.100320  | -0.110 |
| 405<br><input type="checkbox"/> | MA_M2M_0706_R | <a href="#">1425933_a_at</a> | <i>Nt5c2</i>         | 5'-nucleotidase, cytosolic II; exons 12, 13, 14, and 15                                                                            | Chr19: 46.889826  | 9.237  | 45 | 12.0 | Chr5: 93.156983  | -0.266 |
| 406<br><input type="checkbox"/> | MA_M2M_0706_R | <a href="#">1438718_at</a>   | <i>Fgf9</i>          | fibroblast growth factor 9; distal half of 3' UTR                                                                                  | Chr14: 58.109862  | 7.584  | 45 | 9.4  | ChrX: 102.126656 | -0.129 |
| 407<br><input type="checkbox"/> | MA_M2M_0706_R | <a href="#">1457073_at</a>   | <i>Ogt</i>           | O-linked N-acetylglucosamine (GlcNAc) transferase (UDP-N-acetylglucosamine:polypeptide-N-acetylglucosaminyl transferase); intron 5 | ChrX: 101.662586  | 8.687  | 45 | 11.6 | ChrX: 167.394896 | -0.139 |
| 408<br><input type="checkbox"/> | MA_M2M_0706_R | <a href="#">1455979_at</a>   | <i>Arid1b</i>        | AT rich interactive domain 1B (Swi1 like)                                                                                          | Chr17: 5.343789   | 9.384  | 45 | 9.8  | Chr5: 97.810458  | 0.139  |
| 409<br><input type="checkbox"/> | MA_M2M_0706_R | <a href="#">1437024_at</a>   | <i>4122402O22Rik</i> | RIKEN cDNA 4122402O22 gene                                                                                                         | Chr16: 17.644384  | 6.339  | 45 | 9.3  | Chr6: 25.228330  | 0.037  |
| 410<br><input type="checkbox"/> | MA_M2M_0706_R | <a href="#">1450674_at</a>   | <i>Cdk5</i>          | cyclin-dependent kinase 5; last five exons                                                                                         | Chr5: 24.419433   | 9.876  | 45 | 11.7 | Chr5: 23.184735  | -0.120 |
| 411<br><input type="checkbox"/> | MA_M2M_0706_R | <a href="#">1453623_a_at</a> | <i>Rad23a</i>        | RAD23a homolog (S. cerevisiae)                                                                                                     | Chr8: 84.840492   | 7.922  | 45 | 12.4 | Chr8: 80.868085  | 0.239  |
| 412<br><input type="checkbox"/> | MA_M2M_0706_R | <a href="#">1423809_at</a>   | <i>Tcf19</i>         | transcription factor 19                                                                                                            | Chr17: 35.512810  | 7.752  | 45 | 20.9 | Chr9: 3.400000   | -0.102 |
| 413<br><input type="checkbox"/> | MA_M2M_0706_R | <a href="#">1451825_a_at</a> | <i>Copz1</i>         | coatamer protein complex, subunit zeta 1                                                                                           | Chr15: 103.299251 | 11.799 | 45 | 12.5 | Chr12: 36.689834 | 0.086  |



|                                 |               |                            |                      |                                                                                                                                                   |                   |        |    |      |                  |        |
|---------------------------------|---------------|----------------------------|----------------------|---------------------------------------------------------------------------------------------------------------------------------------------------|-------------------|--------|----|------|------------------|--------|
| 414<br><input type="checkbox"/> | MA_M2M_0706_R | <a href="#">1434748_at</a> | <i>Ckap2</i>         | cytoskeleton associated protein 2                                                                                                                 | Chr8: 22.168836   | 6.856  | 45 | 11.9 | Chr15: 7.167980  | -0.061 |
| 415<br><input type="checkbox"/> | MA_M2M_0706_R | <a href="#">1434701_at</a> | <i>Alkbh5</i>        | alkB, alkylation repair homolog 5; distal 3' UTR                                                                                                  | Chr11: 60.557920  | 12.396 | 45 | 9.9  | Chr18: 82.106750 | -0.119 |
| 416<br><input type="checkbox"/> | MA_M2M_0706_R | <a href="#">1418517_at</a> | <i>Irx3</i>          | Iroquois related homeobox 3                                                                                                                       | Chr8: 91.798530   | 11.401 | 45 | 8.5  | Chr18: 16.414681 | -0.151 |
| 417<br><input type="checkbox"/> | MA_M2M_0706_R | <a href="#">1429636_at</a> | <i>1700010D01Rik</i> | RIKEN cDNA 1700010D01 gene                                                                                                                        | ChrX: 92.490095   | 6.768  | 45 | 6.7  | Chr2: 165.782727 | 0.056  |
| 418<br><input type="checkbox"/> | MA_M2M_0706_R | <a href="#">1415917_at</a> | <i>Mthfd1</i>        | methylenetetrahydrofolate dehydrogenase (NADP+ dependent), methenyltetrahydrofolate cyclohydrolase, formyltetrahydrofolate synthase; last 3 exons | Chr12: 76.314424  | 12.892 | 45 | 11.4 | Chr7: 73.746984  | 0.098  |
| 419<br><input type="checkbox"/> | MA_M2M_0706_R | <a href="#">1449481_at</a> | <i>Slc25a13</i>      | solute carrier family 25 (mitochondrial carrier, adenine nucleotide translocator), member 13 (citrin deficiency associated)                       | Chr6: 6.041795    | 11.836 | 45 | 18.1 | Chr6: 23.242013  | 0.192  |
| 420<br><input type="checkbox"/> | MA_M2M_0706_R | <a href="#">1417383_at</a> | <i>Entpd5</i>        | ectonucleoside triphosphate diphosphohydrolase 5                                                                                                  | Chr12: 84.375162  | 11.256 | 45 | 9.2  | ChrX: 47.328644  | 0.182  |
| 421<br><input type="checkbox"/> | MA_M2M_0706_R | <a href="#">1442406_at</a> | <i>Mcart1</i>        | mitochondrial carrier triple repeat 1                                                                                                             | Chr4: 45.406475   | 7.885  | 45 | 6.7  | Chr2: 168.436299 | 0.109  |
| 422<br><input type="checkbox"/> | MA_M2M_0706_R | <a href="#">1454611_at</a> | <i>Calm1</i>         | calmodulin 1; proximal to mid 3'UTR                                                                                                               | Chr12: 100.207086 | 13.046 | 45 | 12.8 | ChrX: 102.126656 | -0.143 |
| 423<br><input type="checkbox"/> | MA_M2M_0706_R | <a href="#">1423940_at</a> | <i>Yif1</i>          | Yip1 interacting factor homolog; exons 1, 2, 3, 4, and 5                                                                                          | Chr19: 5.090017   | 11.972 | 45 | 18.4 | ChrX: 47.328644  | 0.108  |

|                                                                                            |               |                              |                 |                                                                                                            |                  |        |    |      |                  |        |
|--------------------------------------------------------------------------------------------|---------------|------------------------------|-----------------|------------------------------------------------------------------------------------------------------------|------------------|--------|----|------|------------------|--------|
| 424<br>   | MA_M2M_0706_R | <a href="#">1460336_at</a>   | <i>Ppargc1a</i> | peroxisome proliferative activated receptor, gamma, coactivator 1 alpha; last three exons including 3' UTR | Chr5: 51.458065  | 10.285 | 45 | 11.2 | Chr15: 97.657322 | -0.269 |
| 425<br>   | MA_M2M_0706_R | <a href="#">1449369_at</a>   | <i>Tmprss2</i>  | transmembrane protease, serine 2; exons 10, 11, and 12                                                     | Chr16: 97.567022 | 9.278  | 45 | 9.0  | Chr2: 15.000000  | 0.140  |
| 426<br>   | MA_M2M_0706_R | <a href="#">1426008_a_at</a> | <i>Slc7a2</i>   | solute carrier family 7 (cationic amino acid transporter, y+ system), member 2                             | Chr8: 40.916661  | 6.702  | 45 | 6.5  | ChrX: 164.513167 | -0.046 |
| 427<br>   | MA_M2M_0706_R | <a href="#">1453195_at</a>   | <i>Snopc4</i>   | small nuclear RNA activating complex, polypeptide 4                                                        | Chr2: 26.382936  | 9.293  | 45 | 14.0 | Chr15: 91.405127 | 0.121  |
| 428<br>   | MA_M2M_0706_R | <a href="#">1460406_at</a>   | <i>Trpc1</i>    | transient receptor potential cation channel, subfamily C, member 1                                         | Chr9: 95.752943  | 11.106 | 45 | 9.8  | Chr11: 99.734855 | 0.134  |
| 429<br> | MA_M2M_0706_R | <a href="#">1423296_at</a>   | <i>Psmid8</i>   | proteasome (prosome, macropain) 26S subunit, non-ATPase, 8; exons 3, 4, and 5                              | Chr7: 29.176073  | 13.070 | 45 | 13.5 | Chr1: 184.323105 | 0.122  |
| 430<br> | MA_M2M_0706_R | <a href="#">1424392_at</a>   | <i>Adhfe1</i>   | alcohol dehydrogenase, iron containing, 1                                                                  | Chr1: 9.566898   | 13.553 | 45 | 11.5 | ChrX: 102.414526 | 0.133  |
| 431<br> | MA_M2M_0706_R | <a href="#">1417559_at</a>   | <i>Sfxn1</i>    | sideroflexin 1 (flexed tail, tricarboxylate carrier protein, iron homeostasis)                             | Chr13: 54.093053 | 12.597 | 45 | 7.7  | Chr18: 76.826488 | 0.184  |
| 432<br> | MA_M2M_0706_R | <a href="#">1453851_a_at</a> | <i>Gadd45g</i>  | growth arrest and DNA-damage-inducible 45 gamma                                                            | Chr13: 51.847877 | 9.356  | 45 | 13.0 | Chr5: 77.779809  | -0.305 |
| 433<br> | MA_M2M_0706_R | <a href="#">1419975_at</a>   | <i>Scp2</i>     | sterol carrier protein 2, liver; mid-distal 3' UTR                                                         | Chr4: 108.043986 | 10.166 | 45 | 10.2 | ChrX: 50.730573  | -0.297 |
| 434<br> | MA_M2M_0706_R | <a href="#">1426990_at</a>   | <i>Cubn</i>     | cubilin (intrinsic factor-cobalamin receptor)                                                              | Chr2: 13.278386  | 13.765 | 45 | 17.9 | ChrX: 102.126656 | 0.214  |
| 435<br> | MA_M2M_0706_R | <a href="#">1415674_a_at</a> | <i>Trappc4</i>  | trafficking protein particle complex 4; exons 3 and 4                                                      | Chr9: 44.404406  | 10.457 | 45 | 17.7 | Chr7: 24.937915  | -0.170 |

|     |               |                              |                      |                                                                                           |                  |        |    |      |                   |        |
|-----|---------------|------------------------------|----------------------|-------------------------------------------------------------------------------------------|------------------|--------|----|------|-------------------|--------|
| 436 | MA_M2M_0706_R | <a href="#">1426456_a_at</a> | <i>Miz1</i>          | Msx-interacting-zinc finger; exons 8, 9, 10, and 11                                       | Chr18: 77.133220 | 9.441  | 45 | 18.9 | Chr18: 78.806816  | 0.147  |
| 437 | MA_M2M_0706_R | <a href="#">1425020_at</a>   | <i>Ubx2a</i>         | UBX domain protein 2A (p97 adaptor protein); far 3' UTR                                   | Chr12: 4.877133  | 13.142 | 45 | 16.4 | Chr11: 62.251912  | 0.118  |
| 438 | MA_M2M_0706_R | <a href="#">1427705_a_at</a> | <i>Nfkb1</i>         | nuclear factor of kappa light chain gene enhancer in B-cells 1, p105; mid proximal 3' UTR | Chr3: 135.584947 | 9.357  | 45 | 14.9 | Chr1: 178.156680  | 0.085  |
| 439 | MA_M2M_0706_R | <a href="#">1459417_at</a>   | <i>Zfp609</i>        | zinc finger protein 609                                                                   | Chr9: 65.714936  | 7.320  | 45 | 9.9  | Chr8: 24.382366   | -0.043 |
| 440 | MA_M2M_0706_R | <a href="#">1451747_a_at</a> | <i>Apg12</i>         | autophagy related 12; mid distal 3' UTR                                                   | Chr18: 46.732550 | 10.396 | 45 | 15.2 | Chr2: 134.462008  | 0.134  |
| 441 | MA_M2M_0706_R | <a href="#">1423906_at</a>   | <i>Hsbp1</i>         | heat shock factor binding protein 1; mid 3' UTR                                           | Chr8: 119.348382 | 10.672 | 45 | 12.6 | Chr12: 76.378311  | 0.113  |
| 442 | MA_M2M_0706_R | <a href="#">1458525_at</a>   | <i>App</i>           | amyloid beta (A4) precursor protein; intron 1                                             | Chr16: 85.155282 | 9.076  | 45 | 13.1 | Chr13: 119.390734 | -0.185 |
| 443 | MA_M2M_0706_R | <a href="#">1426656_at</a>   | <i>4930504E06Rik</i> | RIKEN cDNA 4930504E06 gene                                                                | Chr3: 95.295369  | 11.232 | 45 | 15.5 | Chr7: 31.360167   | -0.131 |
| 444 | MA_M2M_0706_R | <a href="#">1433166_at</a>   | <i>4930485E13Rik</i> | RIKEN cDNA 4930485E13 gene                                                                | ChrUn: 1.000000  | 6.878  | 45 | 10.7 | Chr5: 85.578195   | -0.037 |
| 445 | MA_M2M_0706_R | <a href="#">1452246_at</a>   | <i>Ostf1</i>         | osteoclast stimulating factor 1                                                           | Chr19: 18.584675 | 10.691 | 45 | 28.3 | Chr19: 18.172211  | 0.253  |
| 446 | MA_M2M_0706_R | <a href="#">1434696_at</a>   | <i>BC037708</i>      | cDNA sequence BC037708                                                                    | Chr2: 163.045339 | 9.762  | 45 | 14.4 | Chr6: 24.108037   | 0.140  |
| 447 | MA_M2M_0706_R | <a href="#">1451149_at</a>   | <i>Pgm2</i>          | phosphoglucomutase 2; last exon and 3' UTR                                                | Chr4: 99.986729  | 11.267 | 45 | 10.5 | Chr9: 99.750326   | 0.105  |
| 448 | MA_M2M_0706_R | <a href="#">1437267_x_at</a> | <i>Hnrnp1</i>        | heterogeneous nuclear ribonucleoprotein H1; distal 3' UTR                                 | Chr11: 50.386367 | 7.915  | 45 | 9.6  | ChrX: 42.224690   | -0.092 |
| 449 | MA_M2M_0706_R | <a href="#">1436502_at</a>   | <i>Mtus1</i>         | mitochondrial tumor suppressor 1; last                                                    | Chr8: 40.993209  | 8.455  | 45 | 9.9  | Chr11:            | -0.154 |

|                                 |               |                              |                      |                                                                                   |                   |        |    |      |                   |            |
|---------------------------------|---------------|------------------------------|----------------------|-----------------------------------------------------------------------------------|-------------------|--------|----|------|-------------------|------------|
|                                 |               |                              |                      | exon and proximal 3' UTR                                                          |                   |        |    |      | 73.26<br>8056     |            |
| 450<br><input type="checkbox"/> | MA_M2M_0706_R | <a href="#">1416096_at</a>   | <i>AI413782</i>      | protein LOC63894; mid 3' UTR                                                      | Chr12: 87.239058  | 10.360 | 45 | 12.8 | Chr11: 42.818374  | -<br>0.104 |
| 451<br><input type="checkbox"/> | MA_M2M_0706_R | <a href="#">1446538_at</a>   | <i>Kpna3</i>         | karyopherin (importin) alpha 3; intron (from EST AK083505)                        | Chr14: 61.405964  | 7.335  | 45 | 9.7  | Chr6: 24.108037   | -<br>0.075 |
| 452<br><input type="checkbox"/> | MA_M2M_0706_R | <a href="#">1448200_at</a>   | <i>Tcn2</i>          | transcobalamin 2; last 2 exons and 3' UTR                                         | Chr11: 3.917372   | 16.251 | 45 | 15.8 | Chr15: 91.405127  | 0.127      |
| 453<br><input type="checkbox"/> | MA_M2M_0706_R | <a href="#">1459150_at</a>   | <i>Lrch1</i>         | leucine-rich repeats and calponin homology (CH) domain containing 1; first intron | Chr14: 74.875130  | 6.007  | 45 | 10.2 | Chr3: 54.220588   | -<br>0.039 |
| 454<br><input type="checkbox"/> | MA_M2M_0706_R | <a href="#">1455571_x_at</a> | <i>Calm1</i>         | calmodulin 1; mid proximal 3' UTR                                                 | Chr12: 100.207059 | 13.160 | 45 | 9.2  | Chr13: 72.874773  | -<br>0.113 |
| 455<br><input type="checkbox"/> | MA_M2M_0706_R | <a href="#">1426593_a_at</a> | <i>Fbxo22</i>        | F-box only protein 22                                                             | Chr9: 55.224277   | 12.590 | 45 | 11.6 | Chr11: 62.251912  | 0.123      |
| 456<br><input type="checkbox"/> | MA_M2M_0706_R | <a href="#">1448422_at</a>   | <i>Tmed4</i>         | transmembrane emp24 protein transport domain containing 4                         | Chr11: 6.270832   | 13.128 | 45 | 9.2  | Chr17: 47.728777  | -<br>0.080 |
| 457<br><input type="checkbox"/> | MA_M2M_0706_R | <a href="#">1430339_at</a>   | <i>2610021K21Rik</i> | RIKEN cDNA 2610021K21 gene                                                        | Chr12: 99.717612  | 5.746  | 45 | 11.8 | Chr4: 88.045738   | 0.033      |
| 458<br><input type="checkbox"/> | MA_M2M_0706_R | <a href="#">1452504_s_at</a> | <i>Ctbs</i>          | chitinase, di-N-acetyl-                                                           | Chr3: 146.458794  | 10.421 | 45 | 7.6  | Chr9: 98.579310   | 0.193      |
| 459<br><input type="checkbox"/> | MA_M2M_0706_R | <a href="#">1423670_a_at</a> | <i>Srpr</i>          | signal recognition particle receptor (ER docking protein); mid to distal 3' UTR   | Chr9: 35.216428   | 12.399 | 45 | 10.3 | ChrX: 102.424804  | 0.078      |
| 460<br><input type="checkbox"/> | MA_M2M_0706_R | <a href="#">1428428_at</a>   | <i>Abhd11</i>        | abhydrolase domain containing 11 (Williams syndrome); last 3 exons and 3' UTR     | Chr5: 135.011355  | 11.319 | 45 | 7.7  | Chr7: 40.421635   | -<br>0.083 |
| 461<br><input type="checkbox"/> | MA_M2M_0706_R | <a href="#">1446356_at</a>   | <i>Ppp2r5e</i>       | protein phosphatase 2, regulatory subunit B (B56), epsilon isoform                | Chr12: 75.486681  | 6.896  | 45 | 9.8  | Chr12: 106.833654 | -<br>0.045 |

|     |               |                              |                       |                                                                                                                      |                  |        |    |      |                   |        |
|-----|---------------|------------------------------|-----------------------|----------------------------------------------------------------------------------------------------------------------|------------------|--------|----|------|-------------------|--------|
| 462 | MA_M2M_0706_R | <a href="#">1453307_a_at</a> | <i>Anapc5</i>         | anaphase-promoting complex subunit 5; exon 7                                                                         | Chr5: 10.236971  | 11.245 | 45 | 9.8  | Chr5: 135.879195  | 0.130  |
| 463 | MA_M2M_0706_R | <a href="#">1427885_at</a>   | <i>Pold4</i>          | polymerase (DNA-directed), delta 4                                                                                   | Chr19: 4.232508  | 8.774  | 45 | 11.4 | Chr11: 64.680151  | -0.104 |
| 464 | MA_M2M_0706_R | <a href="#">1449862_a_at</a> | <i>Pi4k2b</i>         | phosphatidylinositol 4-kinase type 2 beta (neuronal calcium sensor-1 effector); exons 8, 9, 11, and 3' UTR           | Chr5: 52.760874  | 7.310  | 45 | 9.3  | Chr9: 15.889229   | -0.086 |
| 465 | MA_M2M_0706_R | <a href="#">1416933_at</a>   | <i>Por</i>            | P450 (cytochrome) oxidoreductase (endoplasmic reticulum, NADPH-cytochrome P450 reductase); last two exons and 3' UTR | Chr5: 135.734627 | 12.861 | 45 | 9.6  | Chr7: 73.746984   | 0.141  |
| 466 | MA_M2M_0706_R | <a href="#">1452193_a_at</a> | <i>Wasl</i>           | Wiskott-Aldrich syndrome-like; distal 3' UTR                                                                         | Chr6: 24.613837  | 12.234 | 45 | 15.2 | Chr11: 62.251912  | 0.162  |
| 467 | MA_M2M_0706_R | <a href="#">1428433_at</a>   | <i>Hipk2</i>          | homeodomain interacting protein kinase 2; distal 3' UTR                                                              | Chr6: 38.687549  | 11.843 | 45 | 9.1  | Chr13: 119.390734 | -0.135 |
| 468 | MA_M2M_0706_R | <a href="#">1455734_at</a>   | <i>Crbn</i>           | cereblon                                                                                                             | Chr6: 106.778989 | 8.809  | 45 | 11.2 | Chr18: 82.106750  | 0.118  |
| 469 | MA_M2M_0706_R | <a href="#">1451765_a_at</a> | <i>Entpd5</i>         | ectonucleoside triphosphate diphosphohydrolase 5                                                                     | Chr12: 84.376957 | 11.326 | 45 | 11.0 | Chr10: 33.257865  | -0.169 |
| 470 | MA_M2M_0706_R | <a href="#">1444140_at</a>   | <i>Pum1</i>           | pumilio 1 (PUF family RNA-binding protein); intron 2 (from EST AK084282)                                             | Chr4: 130.679429 | 6.753  | 45 | 7.8  | Chr2: 168.436299  | 0.088  |
| 471 | MA_M2M_0706_R | <a href="#">1433355_at</a>   | <i>2610021J01 Rik</i> | RIKEN cDNA 2610021J01 gene; possible antisense in Hmgb2 (poor probe specificity)                                     | --               | 6.282  | 45 | 13.1 | ChrX: 115.338127  | -0.038 |
| 472 | MA_M2M_0706_R | <a href="#">1433747_at</a>   | <i>Lnpep</i>          | leucyl/cystinyl aminopeptidase; distal 3' UTR (non-canonical)                                                        | Chr17: 17.521436 | 10.238 | 45 | 13.5 | Chr13: 117.604982 | -0.162 |

|                                 |               |                              |                 |                                                                                      |                   |        |    |      |                   |        |
|---------------------------------|---------------|------------------------------|-----------------|--------------------------------------------------------------------------------------|-------------------|--------|----|------|-------------------|--------|
| 473<br><input type="checkbox"/> | MA_M2M_0706_R | <a href="#">1416340_a_at</a> | <i>Man2b1</i>   | mannosidase 2, alpha B1; last four exons and 3' UTR                                  | Chr8: 85.096414   | 13.168 | 45 | 14.2 | ChrX: 102.126656  | 0.132  |
| 474<br><input type="checkbox"/> | MA_M2M_0706_R | <a href="#">1424780_a_at</a> | <i>Reep3</i>    | receptor accessory protein 3; distal 3' UTR                                          | Chr10: 67.011532  | 11.252 | 45 | 8.7  | ChrX: 69.232896   | -0.147 |
| 475<br><input type="checkbox"/> | MA_M2M_0706_R | <a href="#">1420990_at</a>   | <i>Chd1</i>     | chromodomain helicase DNA binding protein 1; last two exon and proximal 3'-UTR       | Chr17: 15.768611  | 8.886  | 45 | 14.4 | Chr18: 80.000000  | 0.171  |
| 476<br><input type="checkbox"/> | MA_M2M_0706_R | <a href="#">1423164_at</a>   | <i>Tm7sf1</i>   | transmembrane 7 superfamily member 1                                                 | Chr13: 13.358087  | 9.967  | 45 | 15.3 | Chr9: 98.579310   | 0.149  |
| 477<br><input type="checkbox"/> | MA_M2M_0706_R | <a href="#">1425025_at</a>   | <i>Tmem106a</i> | transmembrane protein 106A; last two exons and proximal 3' UTR                       | Chr11: 101.589980 | 12.294 | 45 | 14.4 | Chr15: 93.021696  | 0.200  |
| 478<br><input type="checkbox"/> | MA_M2M_0706_R | <a href="#">1451407_at</a>   | <i>Jam4</i>     | junction adhesion molecule 4                                                         | Chr16: 96.403442  | 10.903 | 45 | 14.1 | Chr15: 97.760642  | 0.211  |
| 479<br><input type="checkbox"/> | MA_M2M_0706_R | <a href="#">1437496_at</a>   | <i>Acad10</i>   | acyl-Coenzyme A dehydrogenase family member 10; last exon and proximal 3' UTR        | Chr5: 121.598449  | 9.307  | 45 | 10.5 | Chr13: 119.390734 | 0.082  |
| 480<br><input type="checkbox"/> | MA_M2M_0706_R | <a href="#">1436184_at</a>   | <i>Uckl1</i>    | uridine-cytidine kinase 1-like 1                                                     | Chr2: 181.582303  | 8.569  | 45 | 10.7 | Chr7: 24.937915   | -0.120 |
| 481<br><input type="checkbox"/> | MA_M2M_0706_R | <a href="#">1417105_at</a>   | <i>Trapp2cl</i> | trafficking protein particle complex 2-like; last four exons and proximal 3' UTR     | Chr8: 122.613103  | 11.957 | 45 | 18.8 | Chr15: 91.405127  | 0.166  |
| 482<br><input type="checkbox"/> | MA_M2M_0706_R | <a href="#">1448309_at</a>   | <i>Ap3m1</i>    | adaptor-related protein complex 3, mu 1 subunit; last four exons and proximal 3' UTR | Chr14: 21.036673  | 8.958  | 45 | 11.2 | Chr8: 123.289925  | 0.176  |
| 483<br><input type="checkbox"/> | MA_M2M_0706_R | <a href="#">1434290_at</a>   | <i>Gtdc1</i>    | glycosyltransferase-like domain containing 1; mid to distal 3'UTR                    | Chr2: 44.564482   | 7.738  | 45 | 16.2 | Chr8: 123.289925  | 0.110  |
| 484<br><input type="checkbox"/> | MA_M2M_0706_R | <a href="#">1430971_a_at</a> | <i>Aqr</i>      | aquarius                                                                             | Chr2: 114.158933  | 5.981  | 45 | 11.8 | Chr11: 24.905498  | -0.059 |
| 485<br><input type="checkbox"/> | MA_M2M_0706_R | <a href="#">1418365_at</a>   | <i>Ctsh</i>     | cathepsin H                                                                          | Chr9: 90.074884   | 13.608 | 45 | 10.8 | Chr8: 76.227149   | 0.115  |

|                                                                                            |               |                              |                 |                                                                                                             |                  |        |    |      |                   |        |
|--------------------------------------------------------------------------------------------|---------------|------------------------------|-----------------|-------------------------------------------------------------------------------------------------------------|------------------|--------|----|------|-------------------|--------|
| 486<br>   | MA_M2M_0706_R | <a href="#">1424007_at</a>   | <i>Gdf10</i>    | growth differentiation factor 10, bone morphogenetic protein 3B (bone inducing, Bergmann glial cell marker) | Chr14: 33.934703 | 8.235  | 45 | 12.8 | Chr11: 50.383261  | 0.153  |
| 487<br>   | MA_M2M_0706_R | <a href="#">1417442_a_at</a> | <i>Pex3</i>     | peroxisomal biogenesis factor 3                                                                             | Chr10: 13.532375 | 9.440  | 45 | 10.1 | Chr13: 117.604982 | 0.155  |
| 488<br>   | MA_M2M_0706_R | <a href="#">1416170_at</a>   | <i>Trap1</i>    | TNF receptor-associated protein 1                                                                           | Chr16: 4.040139  | 12.933 | 45 | 10.2 | Chr4: 102.851020  | 0.100  |
| 489<br>   | MA_M2M_0706_R | <a href="#">1424657_at</a>   | <i>Taok1</i>    | TAO kinase 1; last exon and proximal 3' UTR                                                                 | Chr11: 77.537681 | 10.464 | 45 | 13.1 | Chr5: 27.285288   | 0.228  |
| 490<br>   | MA_M2M_0706_R | <a href="#">1439797_at</a>   | <i>Ppard</i>    | peroxisome proliferator activator receptor delta; distal 3' UTR                                             | Chr17: 28.301070 | 8.829  | 45 | 8.9  | Chr2: 118.881032  | 0.390  |
| 491<br> | MA_M2M_0706_R | <a href="#">1441253_at</a>   | <i>Rfx3</i>     | regulatory factor X, 3 (dentate gyrus expression signature, influences HLA class II expression); intron 1   | Chr19: 27.992455 | 8.076  | 45 | 9.8  | Chr3: 27.192039   | 0.112  |
| 492<br> | MA_M2M_0706_R | <a href="#">1441312_at</a>   | <i>Cnnm1</i>    | cyclin M1; distal 3' UTR                                                                                    | Chr19: 43.496088 | 6.919  | 45 | 13.1 | Chr1: 193.481242  | 0.082  |
| 493<br> | MA_M2M_0706_R | <a href="#">1421613_at</a>   | <i>H2afy2</i>   | H2A histone family, member Y2                                                                               | Chr15: 62.217666 | 5.902  | 45 | 9.6  | ChrX: 115.338127  | 0.050  |
| 494<br> | MA_M2M_0706_R | <a href="#">1434453_at</a>   | <i>BC053071</i> | hypothetical protein MGC62420                                                                               | Chr14: 24.448840 | 8.502  | 45 | 14.0 | Chr7: 24.937915   | -0.144 |
| 495<br> | MA_M2M_0706_R | <a href="#">1431394_a_at</a> | <i>Lrrk2</i>    | leucine-rich repeat kinase 2 (Parkinson disease 8, autosomal dominant); last exons and proximal 3' UTR      | Chr15: 91.812217 | 11.222 | 45 | 13.9 | Chr6: 36.747330   | 0.209  |
| 496<br> | MA_M2M_0706_R | <a href="#">1425022_at</a>   | <i>Usp3</i>     | ubiquitin specific protease 3; last 4 exons and proximal 3' UTR                                             | Chr9: 66.518371  | 10.102 | 45 | 12.8 | Chr12: 12.602500  | 0.149  |

|                                 |               |                              |                      |                                                                                                                                 |                  |        |    |      |                  |        |
|---------------------------------|---------------|------------------------------|----------------------|---------------------------------------------------------------------------------------------------------------------------------|------------------|--------|----|------|------------------|--------|
| 497<br><input type="checkbox"/> | MA_M2M_0706_R | <a href="#">1431216_s_at</a> | <i>Dnajc6</i>        | DnaJ (Hsp40) homolog, subfamily C, member 6; proximal 3' UTR                                                                    | Chr4: 101.640739 | 6.677  | 45 | 13.1 | Chr8: 88.711457  | 0.091  |
| 498<br><input type="checkbox"/> | MA_M2M_0706_R | <a href="#">1434050_at</a>   | <i>AI315068</i>      | expressed sequence AI315068                                                                                                     | Chr16: 21.640728 | 9.564  | 45 | 10.2 | Chr10: 27.579570 | -0.184 |
| 499<br><input type="checkbox"/> | MA_M2M_0706_R | <a href="#">1457949_at</a>   | <i>Nt5c2</i>         | 5'-nucleotidase, cytosolic II; putative exon                                                                                    | Chr19: 46.885497 | 7.837  | 45 | 20.5 | Chr11: 62.251912 | -0.122 |
| 500<br><input type="checkbox"/> | MA_M2M_0706_R | <a href="#">1456669_at</a>   | <i>AK044157</i>      | fat expressed non-coding sequence AK044157; 3' end of sequence (antisense in last intron of Ptgis)                              | Chr2: 166.883175 | 6.832  | 45 | 7.4  | Chr5: 106.818409 | 0.075  |
| 501<br><input type="checkbox"/> | MA_M2M_0706_R | <a href="#">1445747_at</a>   | <i>Osx</i>           | ESTs                                                                                                                            | ChrX: 162.735296 | 6.628  | 45 | 12.8 | ChrX: 139.352577 | -0.067 |
| 502<br><input type="checkbox"/> | MA_M2M_0706_R | <a href="#">1425997_at</a>   | <i>Pign</i>          | phosphatidylinositol glycan, class N                                                                                            | Chr1: 105.557466 | 7.725  | 45 | 8.5  | Chr16: 37.101961 | 0.064  |
| 503<br><input type="checkbox"/> | MA_M2M_0706_R | <a href="#">1426410_at</a>   | <i>Pdk3</i>          | pyruvate dehydrogenase kinase, isoenzyme 3; exons 9, 10, and 11 and proximal 3' UTR (transQTL on Chr 1 in BXD hippocampus data) | ChrX: 93.768916  | 10.872 | 45 | 11.4 | Chr13: 45.202912 | -0.206 |
| 504<br><input type="checkbox"/> | MA_M2M_0706_R | <a href="#">1439254_at</a>   | <i>Akap13</i>        | A kinase (PRKA) anchor protein 13                                                                                               | Chr7: 75.609839  | 6.396  | 45 | 7.7  | Chr7: 6.011490   | 0.132  |
| 505<br><input type="checkbox"/> | MA_M2M_0706_R | <a href="#">1417844_at</a>   | <i>Vdrip</i>         | vitamin D receptor interacting protein                                                                                          | Chr14: 73.517967 | 8.799  | 45 | 11.1 | Chr17: 75.881027 | 0.117  |
| 506<br><input type="checkbox"/> | MA_M2M_0706_R | <a href="#">1430682_at</a>   | <i>4930555I21Rik</i> | RIKEN cDNA 4930555I21 gene                                                                                                      | Chr4: 135.537270 | 6.665  | 45 | 11.1 | Chr16: 11.886422 | -0.043 |
| 507<br><input type="checkbox"/> | MA_M2M_0706_R | <a href="#">1428028_at</a>   | <i>Gt4-1</i>         | gene trap insertion site 4-1                                                                                                    | Chr16: 13.326470 | 7.529  | 45 | 10.3 | Chr2: 176.00000  | 0.082  |
| 508<br><input type="checkbox"/> | MA_M2M_0706_R | <a href="#">1428380_at</a>   | <i>Apr3</i>          | apoptosis-related protein 3 (human chromosome 2 open                                                                            | Chr5: 31.052528  | 12.591 | 45 | 11.0 | Chr5: 127.781724 | 0.121  |



|                                 |                   |                              |                      |                                                                                                   |                  |        |    |      |                  |        |
|---------------------------------|-------------------|------------------------------|----------------------|---------------------------------------------------------------------------------------------------|------------------|--------|----|------|------------------|--------|
|                                 |                   |                              |                      | reading frame 28);<br>last three exons                                                            |                  |        |    |      |                  |        |
| 509<br><input type="checkbox"/> | MA_M2M<br>_0706_R | <a href="#">1421848_at</a>   | <i>Slc22a5</i>       | solute carrier family 22 (organic cation transporter), member 5; last 4 exons and proximal 3' UTR | Chr11: 53.865710 | 11.860 | 45 | 7.4  | Chr2: 159.447549 | 0.192  |
| 510<br><input type="checkbox"/> | MA_M2M<br>_0706_R | <a href="#">1454609_x_at</a> | <i>6430527G18Rik</i> | RIKEN cDNA 6430527G18 gene                                                                        | Chr12: 86.881028 | 9.633  | 45 | 8.5  | Chr13: 53.477510 | -0.112 |
| 511<br><input type="checkbox"/> | MA_M2M<br>_0706_R | <a href="#">1452920_a_at</a> | <i>Ppil2</i>         | peptidylprolyl isomerase (cyclophilin)-like 2; 6 exons                                            | Chr16: 17.088829 | 10.168 | 45 | 8.3  | Chr1: 98.793301  | 0.110  |
| 512<br><input type="checkbox"/> | MA_M2M<br>_0706_R | <a href="#">1419173_at</a>   | <i>Acy1</i>          | aminoacylase 1; last three exons and mid 3' UTR                                                   | Chr9: 106.433027 | 12.598 | 45 | 43.0 | Chr9: 105.774381 | 0.579  |
| 513<br><input type="checkbox"/> | MA_M2M<br>_0706_R | <a href="#">1451622_at</a>   | <i>Lmbrd1</i>        | LMBR1 domain containing 1; last three exons and proximal 3' UTR                                   | Chr1: 24.748801  | 11.389 | 45 | 10.5 | Chr11: 7.130166  | 0.099  |
| 514<br><input type="checkbox"/> | MA_M2M<br>_0706_R | <a href="#">1441208_at</a>   | <i>Hdhd2</i>         | haloacid dehalogenase-like hydrolase domain containing; putative deep 3' UTR                      | Chr18: 76.973281 | 8.228  | 45 | 13.8 | Chr11: 73.268056 | -0.101 |
| 515<br><input type="checkbox"/> | MA_M2M<br>_0706_R | <a href="#">1420509_at</a>   | <i>2810036K01Rik</i> | RIKEN cDNA 2810036E22 gene                                                                        | Chr18: 52.488921 | 8.640  | 45 | 13.5 | Chr12: 12.791300 | 0.109  |
| 516<br><input type="checkbox"/> | MA_M2M<br>_0706_R | <a href="#">1441220_at</a>   | <i>Magi2</i>         | membrane associated guanylate kinase, WW and PDZ domain containing 2; putative intron             | Chr5: 19.786584  | 8.027  | 45 | 14.9 | Chr3: 27.192039  | 0.132  |
| 517<br><input type="checkbox"/> | MA_M2M<br>_0706_R | <a href="#">1456668_at</a>   | <i>Zcchc11</i>       | zinc finger, CCHC domain containing 11; intron (from EST AK033820 AND 9230115F04Rik)              | Chr4: 108.538206 | 6.276  | 45 | 16.8 | Chr2: 35.013636  | -0.045 |
| 518<br><input type="checkbox"/> | MA_M2M<br>_0706_R | <a href="#">1451276_at</a>   | <i>Uhrf1bp1l</i>     | UHRF1 (ICBP90) binding protein 1-like                                                             | Chr10: 89.819273 | 10.926 | 45 | 7.9  | Chr2: 109.782694 | -0.116 |
| 519<br><input type="checkbox"/> | MA_M2M<br>_0706_R | <a href="#">1420618_at</a>   | <i>Cpeb4</i>         | cytoplasmic polyadenylation element binding protein 4; distal 3' UTR                              | Chr11: 31.935120 | 13.126 | 45 | 10.1 | Chr3: 113.087963 | 0.187  |

|     |               |            |               |                                  |                   |       |    |      |                  |        |
|-----|---------------|------------|---------------|----------------------------------|-------------------|-------|----|------|------------------|--------|
| 520 | MA_M2M_0706_R | 143289_at  | 4930544L18Rik | RIKEN cDNA 4930544L18 gene       | Chr14: 118.665020 | 6.126 | 45 | 13.6 | Chr7: 71.410581  | 0.050  |
| 521 | MA_M2M_0706_R | 1434189_at | Stag1         | stromal antigen 1; distal 3' UTR | Chr9: 100.958100  | 9.193 | 45 | 10.9 | Chr8: 3.500000   | 0.086  |
| 522 | MA_M2M_0706_R | 1443162_at | 2310031L18Rik | RIKEN cDNA 2310031L18 gene       | Chr4: 57.213165   | 6.624 | 45 | 8.3  | Chr15: 93.021696 | -0.065 |

Supplemental Figure S1. Expression levels of Adam17 in kidney between female and male

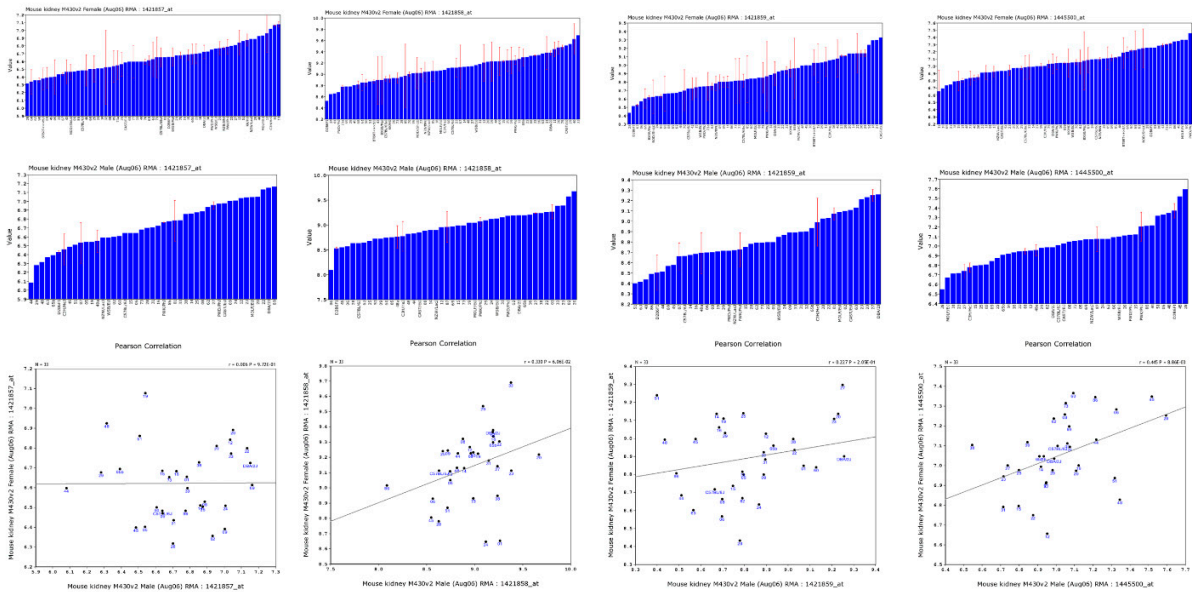

Supplemental Figure S2. Expression levels of Tmprss2 in kidney between female and male

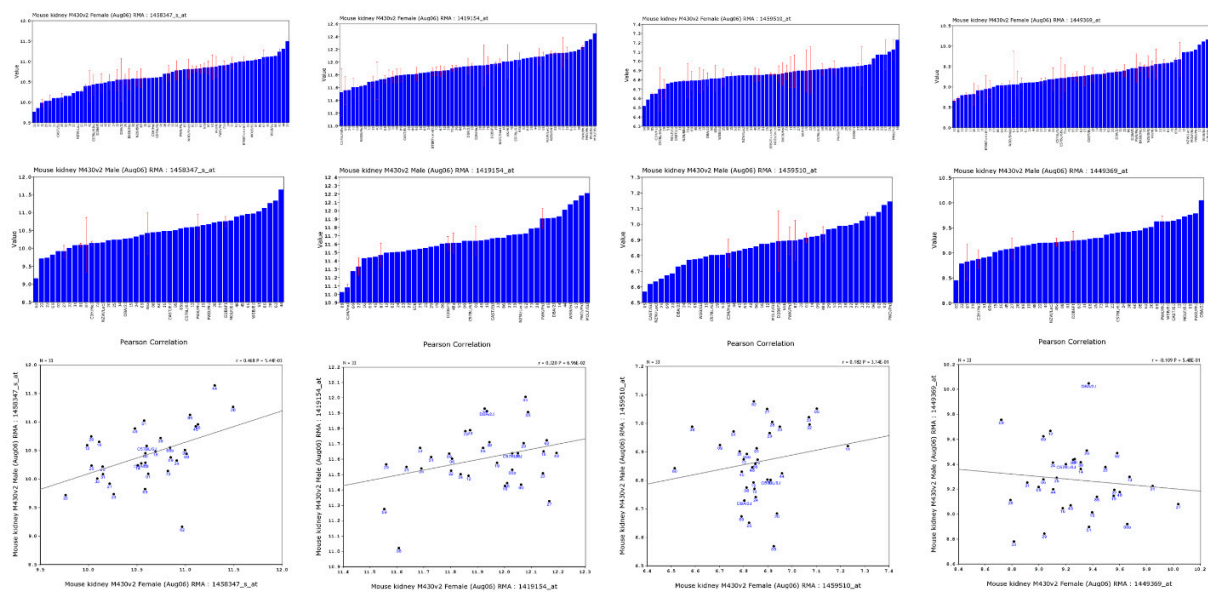

**Supplemental Figure S3. Expression levels of Mcam (CD146) in kidney between female and male**

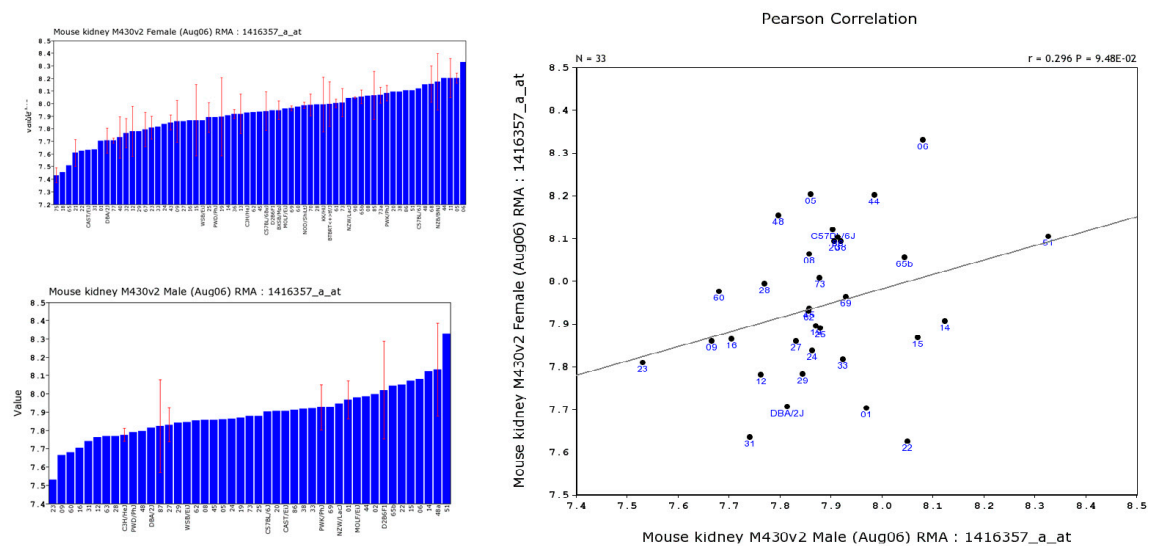

Supplement: s1 [file s1]
